# Supplementary material for: Hidden long-range memories of growth and cycle speed correlate cell cycles in lineage trees
Source: PubMed Central journal article supplement (PMC7018508; doi:10.7554/elife.51002), 2020-01-23
Supplement: elife-51002-fig1-data1.pdf [file elife-51002-fig1-data1.pdf]

| Experiment ID | Cell line | Perturbation                                      | Obs. time | Total generations | Corrected | Figures |
|---------------|-----------|---------------------------------------------------|-----------|-------------------|-----------|---------|
| rep1          | TET21N    | <i>MYCN</i> -overexpression                       | 140h      | 10                | 6         | Fig. 1  |
| rep2          |           |                                                   | 141h      | 11                | 7         |         |
| rep3          |           |                                                   | 120h      | 9                 | 5         |         |
| -myc1         |           | <i>MYCN</i> -inhibition, 1 $\mu$ g/ml doxycycline | 166h      | 9                 | 5         | Fig. 4  |
| -myc2         |           | <i>MYCN</i> -inhibition, 1 $\mu$ g/ml doxycycline | 141h      | 8                 | 5         |         |
| rap1          |           | <i>mTOR</i> -inhibition, 40nM rapamycin           | 117h      | 8                 | 5         | Fig. 4  |
| rap2          |           | <i>mTOR</i> -inhibition, 20nM rapamycin           | 115h      | 7                 | 5         |         |
| esc1          | R1 mESCs  | non-transformed                                   | >103h     | 7                 |           | Fig. 5  |
| esc2          |           |                                                   | >101h     | 10                |           |         |
| esc1          |           |                                                   | >86h      | 8                 |           |         |
