# Supplementary material for: Hidden long-range memories of growth and cycle speed correlate cell cycles in lineage trees
Source: PubMed Central journal article supplement (PMC7018508; doi:10.7554/elife.51002), 2020-01-23
Supplement: elife-51002-fig3-data1.pdf [file elife-51002-fig3-data1.pdf]

| Experiment ID          | $k$     | $\sigma_g$ | $a$  | $\gamma$ | $\mu$  | $\sigma_p$ |
|------------------------|---------|------------|------|----------|--------|------------|
| rep1                   | 0.0375  | 0.02       | 0.56 | 0.8      | 2.7    | 0.4        |
| rep2                   | 0.045   | 0.02       | 0.16 | 0.6      | 2.66   | 0.2        |
| rep3                   | 0.0405  | 0.02       | 0.27 | 0.58     | 2.76   | 0.22       |
| -myc1 (logistic)       | 0.0315  | 0.04       | 0.6  | 0.65     | 3.14   | 0.18       |
| -myc2 (logistic)       | 0.033   | 0.02       | 0.3  | 0.6      | 3.14   | 0.22       |
| rap1                   | 0.037   | 0.05       | 0.94 | 0.96     | 2.66   | 0.4        |
| rap2                   | 0.0285  | 0.04       | 0.82 | 0.84     | 2.89   | 0.44       |
| esc1                   | 0.057   | 0.05       | 0.72 | 0.92     | 2.26   | 0.38       |
| esc2                   | 0.0695  | 0.07       | 0.89 | 0.98     | 2.09   | 0.41       |
| esc3                   | 0.0685  | 0.04       | 0.8  | 0.8      | 1.78   | 0.62       |
| rep1 ( $k - 10\%$ )    | 0.03375 | 0.02       | 0.56 | 0.8      | 2.7    | 0.4        |
| rep1 ( $\mu + 7.5\%$ ) | 0.0375  | 0.02       | 0.56 | 0.8      | 2.9025 | 0.4        |
