# Supplementary material for: Hidden long-range memories of growth and cycle speed correlate cell cycles in lineage trees
Source: eLife. 2020 Jan 23;9:e51002. doi: 10.7554/eLife.51002 (PMC7018508; doi:10.7554/eLife.51002)
Supplement: Figure 1—source data 2. [file elife-51002-fig1-data2.xlsx]

## Sheet: rep1
Lineage ID	Sibling 1 cycle length	Sibling 1 time to death	Sibling 1 time to cell loss	Sibling 2 cycle length	Sibling 2 time to death	Sibling 2 time to cell loss	Birth time	Sibling 1 ID	Sibling 2 ID	Mother ID	Birth x position sibling 1	Birth y position sibling 1	Birth x position sibling 2	Birth y position sibling 2	Generation	Mother cycle length	Grandmother cycle length	Grandmother ID
1	NaN	46.1667	NaN	20.5	NaN	NaN	11.5	10102	10103	10101	1018.64	483.355	1006.66	477.762	2	NaN	NaN	101000
1	31.5	NaN	NaN	25.5	NaN	NaN	32	101010	10109	10103	858.054	557.655	871.636	586.417	3	20.5	NaN	10101
1	26.5	NaN	NaN	17.1667	NaN	NaN	63.5	101012	101013	101010	1190.41	559.253	1169.64	565.645	4	31.5	20.5	10103
1	17	NaN	NaN	17	NaN	NaN	90	101015	101016	101012	1118.51	210.918	1103.33	206.924	5	26.5	31.5	101010
1	14.5	NaN	NaN	14.1667	NaN	NaN	107	101018	101019	101015	1223.97	321.171	1212.78	334.753	6	17	26.5	101012
1	15.5	NaN	NaN	16.1667	NaN	NaN	121.5	101021	101022	101018	1108.12	288.415	1088.95	278.029	7	14.5	17	101015
1	NaN	NaN	3.5	NaN	NaN	3.5	137	101024	101025	101021	1274.3	453.794	1256.72	453.794	8	15.5	14.5	101018
1	NaN	NaN	2.83333	NaN	NaN	2.83333	137.667	101029	101030	101022	1323.03	227.696	1308.65	231.691	8	16.1667	14.5	101018
1	NaN	NaN	19.3333	15.3333	NaN	NaN	121.167	101034	101035	101019	1108.79	486.95	1092.81	501.331	7	14.1667	17	101015
1	NaN	NaN	4	NaN	NaN	4	136.5	101039	101040	101035	1178.03	473.901	1164.71	478.162	8	15.3333	14.1667	101019
1	15.5	NaN	NaN	NaN	NaN	3.83333	107	101044	101045	101016	1058.45	65.113	1023.83	54.993	6	17	26.5	101012
1	NaN	5.83333	NaN	NaN	NaN	12.3333	122.5	101047	101048	101044	1136.75	85.885	1120.24	95.473	7	15.5	17	101016
1	15.3333	NaN	NaN	15.5	NaN	NaN	80.6667	101055	101056	101013	1050.2	469.64	1033.15	462.183	5	17.1667	31.5	101010
1	16.1667	NaN	NaN	13.3333	NaN	NaN	96	101058	101059	101055	1098.67	398.535	1078.96	395.339	6	15.3333	17.1667	101013
1	18.1667	NaN	NaN	18	NaN	NaN	112.167	101061	101062	101058	1094.4	464.047	1090.68	483.221	7	16.1667	15.3333	101055
1	NaN	NaN	10.1667	NaN	NaN	2.83333	130.333	101064	101065	101061	1262.71	283.222	1247.27	288.548	8	18.1667	16.1667	101058
1	NaN	NaN	10.3333	NaN	NaN	10.3333	130.167	101069	101070	101062	1143.94	286.418	1121.57	277.363	8	18	16.1667	101058
1	15.8333	NaN	NaN	16.5	NaN	NaN	109.333	101074	101075	101059	1130.89	562.848	1123.97	554.327	7	13.3333	15.3333	101055
1	NaN	NaN	15.3333	NaN	NaN	15.3333	125.167	101077	101078	101074	1217.97	762.049	1217.97	772.169	8	15.8333	13.3333	101059
1	NaN	NaN	14.6667	NaN	NaN	14.6667	125.833	101082	101083	101075	1158.85	561.251	1154.06	580.958	8	16.5	13.3333	101059
1	14.6667	NaN	NaN	14.6667	NaN	NaN	96.1667	101088	101089	101056	899.466	483.754	886.15	494.407	6	15.5	17.1667	101013
1	16.8333	NaN	NaN	16.6667	NaN	NaN	110.833	101091	101092	101089	764.18	728.228	752.462	740.478	7	14.6667	15.5	101056
1	NaN	NaN	12.8333	NaN	NaN	12.8333	127.667	101094	101095	101091	697.602	676.563	690.678	660.052	8	16.8333	14.6667	101089
1	NaN	NaN	13	NaN	NaN	13	127.5	1010100	1010101	101092	631.024	730.624	632.089	746.071	8	16.6667	14.6667	101089
1	16.8333	NaN	NaN	16.1667	NaN	NaN	110.833	1010105	1010106	101088	770.039	491.743	757.256	498.135	7	14.6667	15.5	101056
1	NaN	NaN	12.8333	NaN	NaN	12.8333	127.667	1010108	1010109	1010105	613.714	758.321	601.464	762.582	8	16.8333	14.6667	101088
1	NaN	NaN	13.5	NaN	NaN	13.5	127	1010115	1010116	1010106	774.299	690.411	770.571	678.694	8	16.1667	14.6667	101088
1	18.1667	NaN	NaN	14.3333	NaN	NaN	57.5	1010120	1010121	10109	828.361	494.673	802.795	486.684	4	25.5	20.5	10103
1	NaN	24.5	NaN	21.1667	NaN	NaN	75.6667	1010127	1010126	1010120	969.239	320.505	982.555	333.288	5	18.1667	25.5	10109
1	NaN	NaN	43.6667	NaN	NaN	43.6667	96.8333	1010132	1010133	1010126	1077.89	466.444	1053.93	479.227	6	21.1667	18.1667	1010120
1	16.3333	NaN	NaN	16.3333	NaN	NaN	71.8333	1010124	1010125	1010121	971.37	408.122	963.38	391.078	5	14.3333	25.5	10109
1	15.6667	NaN	NaN	14.8333	NaN	NaN	88.1667	1010142	1010143	1010124	986.816	494.673	969.239	498.934	6	16.3333	14.3333	1010121
1	17.5	NaN	NaN	19	NaN	NaN	103	1010190	1010191	1010143	1110.92	701.064	1097.6	704.26	7	14.8333	16.3333	1010124
1	NaN	NaN	20	NaN	NaN	20	120.5	1010193	1010194	1010190	1091.21	734.087	1082.15	748.467	8	17.5	14.8333	1010143
1	16.6667	NaN	NaN	18.3333	NaN	NaN	122	1010200	1010201	1010191	912.781	435.285	906.39	427.829	8	19	14.8333	1010143
1	NaN	NaN	1.83333	NaN	NaN	1.83333	138.667	1010203	1010204	1010200	882.422	469.373	870.171	474.7	9	16.6667	19	1010191
1	NaN	NaN	0.166667	NaN	NaN	0.166667	140.333	1010208	1010209	1010201	1010.25	440.079	1000.66	443.275	9	18.3333	19	1010191
1	15.3333	NaN	NaN	18.6667	NaN	NaN	103.833	1010145	1010146	1010142	1040.88	661.117	1044.07	676.563	7	15.6667	16.3333	1010124
1	17.1667	NaN	NaN	17	NaN	NaN	119.167	1010148	1010149	1010145	1039.81	552.462	1033.42	539.679	8	15.3333	15.6667	1010142
1	NaN	NaN	4.16667	NaN	NaN	4.16667	136.333	1010151	1010152	1010148	918.374	568.974	911.45	580.691	9	17.1667	15.3333	1010145
1	NaN	NaN	4.33333	NaN	NaN	4.33333	136.167	1010156	1010157	1010149	977.495	656.856	957.255	648.334	9	17	15.3333	1010145
1	NaN	NaN	18	NaN	NaN	18	122.5	1010160	1010161	1010146	952.462	594.007	940.211	598.8	8	18.6667	15.6667	1010142
1	15.6667	NaN	NaN	15.3333	NaN	NaN	88.1667	1010166	1010167	1010125	1115.98	249.134	1108.52	240.612	6	16.3333	14.3333	1010121
1	19.3333	NaN	NaN	17.1667	NaN	NaN	103.833	1010169	1010170	1010166	1031.02	143.941	1019.31	130.093	7	15.6667	16.3333	1010125
1	NaN	NaN	17.3333	NaN	NaN	17.3333	123.167	1010172	1010173	1010169	1246.73	165.779	1233.95	161.518	8	19.3333	15.6667	1010166
1	NaN	NaN	2	NaN	NaN	2.5	121	1010179	1010180	1010170	892.009	125.832	885.085	136.484	8	17.1667	15.6667	1010166
1	NaN	NaN	1.16667	NaN	NaN	6	103.5	1010184	1010185	1010167	1074.96	43.276	1061.12	49.134	7	15.3333	16.3333	1010125
2	20.8333	NaN	NaN	16.6667	NaN	NaN	7.66667	10202	10203	10201	1080.96	856.456	1063.38	854.859	2	NaN	NaN	102000
2	16	NaN	NaN	17.5	NaN	NaN	28.5	10205	10206	10202	944.339	827.695	925.964	841.277	3	20.8333	NaN	10201
2	14	NaN	NaN	15.3333	NaN	NaN	44.5	10208	10209	10205	1067.38	866.044	1052.99	844.472	4	16	20.8333	10202
2	16.1667	NaN	NaN	15.1667	NaN	NaN	58.5	102012	102013	10208	1056.99	741.41	1055.39	725.431	5	14	16	10205
2	15.3333	NaN	NaN	18.5	NaN	NaN	59.8333	102014	102015	10209	1023.43	768.574	1013.05	762.981	5	15.3333	16	10205
2	17	NaN	NaN	15.3333	NaN	NaN	75.1667	102019	102020	102014	1041.81	743.807	1035.42	758.188	6	15.3333	15.3333	10209
2	21.1667	NaN	NaN	18.5	NaN	NaN	92.1667	102022	102023	102019	1084.15	803.727	1074.57	803.727	7	17	15.3333	102014
2	16.3333	NaN	NaN	16.1667	NaN	NaN	113.333	102025	102026	102022	886.15	853.128	884.552	869.106	8	21.1667	17	102019
2	NaN	NaN	10.8333	NaN	NaN	10.8333	129.667	102028	102029	102025	912.249	903.727	895.205	897.868	9	16.3333	21.1667	102022
2	NaN	NaN	11	NaN	NaN	11	129.5	102033	102034	102026	1011.32	850.997	993.207	855.258	9	16.1667	21.1667	102022
2	23.3333	NaN	NaN	20	NaN	NaN	110.667	102039	102040	102023	1233.42	681.623	1216.91	673.634	8	18.5	17	102019
2	NaN	NaN	6.5	NaN	NaN	6.5	134	102042	102043	102039	1003.33	797.735	992.142	786.55	9	23.3333	18.5	102023
2	NaN	NaN	9.83333	NaN	NaN	9.83333	130.667	102047	102048	102040	1285.08	647.535	1267.51	648.601	9	20	18.5	102023
2	17.3333	NaN	NaN	15.5	NaN	NaN	90.5	102052	102053	102020	916.243	611.317	906.656	620.372	7	15.3333	15.3333	102014
2	22.3333	NaN	NaN	21.6667	NaN	NaN	107.833	102055	102056	102052	965.245	394.007	949.798	383.887	8	17.3333	15.3333	102020
2	NaN	NaN	10.3333	NaN	NaN	10.3333	130.167	102058	102059	102055	817.975	238.748	818.507	229.693	9	22.3333	17.3333	102052
2	NaN	NaN	11	NaN	NaN	11	129.5	102063	102064	102056	824.899	193.475	813.181	181.225	9	21.6667	17.3333	102052
2	18.5	NaN	NaN	18.8333	NaN	NaN	106	102068	102069	102053	1093.34	651.93	1093.34	643.141	8	15.5	15.3333	102020
2	NaN	NaN	16	NaN	NaN	16	124.5	102071	102072	102068	1236.35	933.953	1227.56	944.739	9	18.5	15.5	102053
2	NaN	NaN	15.6667	NaN	NaN	15.6667	124.833	102078	102079	102069	1117.31	867.242	1105.32	862.049	9	18.8333	15.5	102053
2	17.6667	NaN	NaN	14.8333	NaN	NaN	74.6667	102084	102085	102012	1117.31	616.377	1101.33	599.599	6	16.1667	14	10208
2	17.5	NaN	NaN	21.3333	NaN	NaN	89.5	102090	102091	102085	1159.65	581.224	1151.26	588.814	7	14.8333	16.1667	102012
2	19.5	NaN	NaN	21	NaN	NaN	107	102093	102094	102090	1060.98	659.919	1058.59	677.096	8	17.5	14.8333	102085
2	NaN	NaN	14	NaN	NaN	14	126.5	102096	102097	102093	1097.34	669.107	1087.35	687.083	9	19.5	17.5	102090
2	NaN	NaN	12.5	NaN	NaN	12.5	128	1020103	1020104	102094	1010.65	605.591	996.27	599.2	9	21	17.5	102090
2	23	NaN	NaN	22.3333	NaN	NaN	110.833	1020108	1020109	102091	1061.38	632.356	1037.02	637.549	8	21.3333	14.8333	102085
2	NaN	NaN	6.66667	NaN	NaN	6.66667	133.833	1020111	1020112	1020108	1049	675.898	1028.23	673.9	9	23	21.3333	102091
2	NaN	NaN	7.33333	NaN	NaN	7.33333	133.167	1020116	1020117	1020109	1144.21	607.589	1127.69	597.203	9	22.3333	21.3333	102091
2	28.8333	NaN	NaN	24.5	NaN	NaN	92.3333	102087	102088	102084	1217.57	521.304	1216.38	508.122	7	17.6667	16.1667	102012
2	NaN	NaN	19.3333	NaN	NaN	19.3333	121.167	1020121	1020122	102087	1205.99	575.365	1202.53	588.681	8	28.8333	17.6667	102084
2	21.1667	NaN	NaN	NaN	NaN	23.6667	116.833	1020128	1020129	102088	1253.53	677.495	1240.74	685.485	8	24.5	17.6667	102084
2	NaN	NaN	2.5	NaN	NaN	2.5	138	1020131	1020132	1020128	1032.09	613.98	1020.37	616.643	9	21.1667	24.5	102088
2	24.1667	NaN	NaN	19.8333	NaN	NaN	73.6667	1020136	1020137	102013	1154.86	399.467	1148.47	409.453	6	15.1667	14	10208
2	29.8333	NaN	NaN	26	NaN	NaN	97.8333	1020139	1020140	1020136	981.49	307.19	967.908	298.801	7	24.1667	15.1667	102013
2	NaN	NaN	12.8333	NaN	NaN	12.8333	127.667	1020142	1020143	1020139	1074.57	250.066	1056.19	234.087	8	29.8333	24.1667	1020136
2	NaN	NaN	0.333333	NaN	NaN	0.333333	123.833	1020147	1020148	1020140	984.685	256.857	991.876	240.079	8	26	24.1667	1020136
2	21.6667	NaN	NaN	NaN	NaN	18.3333	93.5	1020150	1020151	1020137	1184.42	471.77	1179.22	454.992	7	19.8333	15.1667	102013
2	NaN	NaN	17	NaN	NaN	25.3333	115.167	1020153	1020154	1020150	1307.45	478.561	1291.48	484.154	8	21.6667	19.8333	1020137
2	NaN	NaN	7.16667	17.6667	NaN	NaN	24.3333	1020162	1020163	10203	1298.67	685.884	1287.88	683.487	3	16.6667	NaN	10201
2	18	NaN	NaN	NaN	NaN	12.5	42	1020167	1020168	1020163	1279.49	521.703	1275.5	539.679	4	17.6667	16.6667	10203
2	NaN	NaN	4.33333	NaN	NaN	5.16667	60	1020170	1020171	1020167	1388.94	353.927	1375.36	343.941	5	18	17.6667	1020163
2	17.3333	NaN	NaN	17.6667	NaN	NaN	46	1020177	1020178	10206	891.61	711.45	875.631	704.26	4	17.5	20.8333	10202
2	NaN	29	NaN	19.1667	NaN	NaN	63.3333	1020180	1020181	1020177	814.113	758.987	800.931	767.775	5	17.3333	17.5	10206
2	18.8333	NaN	NaN	24.8333	NaN	NaN	82.5	1020185	1020186	1020181	948.334	996.669	944.339	1009.85	6	19.1667	17.3333	1020177
2	23	NaN	NaN	22.1667	NaN	NaN	101.333	1020188	1020189	1020185	969.506	872.835	952.328	868.84	7	18.8333	19.1667	1020181
2	NaN	NaN	16.1667	NaN	NaN	16.1667	124.333	1020192	1020193	1020188	949.133	969.106	947.934	987.482	8	23	18.8333	1020185
2	NaN	NaN	17	NaN	NaN	17	123.5	1020196	1020197	1020189	994.272	1012.65	972.302	1003.86	8	22.1667	18.8333	1020185
2	NaN	NaN	33.1667	30	NaN	NaN	107.333	1020201	1020202	1020186	901.197	1086.95	885.618	1086.15	7	24.8333	19.1667	1020181
2	NaN	NaN	3.16667	NaN	NaN	3.16667	137.333	1020206	1020207	1020202	951.53	1040.61	949.133	1051.8	8	30	24.8333	1020186
2	20.3333	NaN	NaN	20.5	NaN	NaN	63.6667	1020211	1020212	1020178	1007.85	555.259	998.667	553.261	5	17.6667	17.5	10206
2	20.8333	NaN	NaN	19.8333	NaN	NaN	84	1020214	1020215	1020211	1115.71	628.361	1102.53	632.755	6	20.3333	17.6667	1020178
2	21.3333	NaN	NaN	22.3333	NaN	NaN	104.833	1020217	1020218	1020214	1011.45	663.914	1010.25	647.935	7	20.8333	20.3333	1020211
2	NaN	NaN	14.3333	NaN	NaN	14.3333	126.167	1020220	1020221	1020217	1007.46	755.391	997.868	736.217	8	21.3333	20.8333	1020214
2	NaN	NaN	13.3333	NaN	NaN	13.3333	127.167	1020225	1020226	1020218	972.302	589.213	962.715	573.634	8	22.3333	20.8333	1020214
2	19.5	NaN	NaN	24.1667	NaN	NaN	84.1667	1020230	1020231	1020212	1023.03	490.146	1023.03	508.521	6	20.5	17.6667	1020178
2	24.3333	NaN	NaN	27.3333	NaN	NaN	108.333	1020234	1020235	1020231	1022.63	423.435	1014.25	412.25	7	24.1667	20.5	1020212
2	NaN	NaN	7.83333	NaN	NaN	7.83333	132.667	1020237	1020238	1020234	1109.72	656.723	1104.13	675.498	8	24.3333	24.1667	1020231
2	22	NaN	NaN	22.6667	NaN	NaN	78.3333	1020245	1020246	102015	998.267	689.879	990.278	683.088	6	18.5	15.3333	10209
2	21.6667	NaN	NaN	22	NaN	NaN	100.333	1020248	1020249	1020245	1066.97	832.888	1053.79	828.494	7	22	18.5	102015
2	12	NaN	NaN	18	NaN	NaN	122	1020251	1020252	1020248	963.114	898.4	947.135	898.001	8	21.6667	22	1020245
2	NaN	NaN	6.5	NaN	NaN	6.5	134	1020254	1020255	1020251	885.218	896.403	882.022	907.588	9	12	21.6667	1020248
2	NaN	NaN	0.5	NaN	NaN	0.5	140	1020259	1020260	1020252	1038.21	907.588	1031.42	917.175	9	18	21.6667	1020248
2	NaN	NaN	7.33333	22.1667	NaN	NaN	101	1020262	1020263	1020246	1370.3	836.883	1340.48	838.48	7	22.6667	18.5	102015
2	NaN	NaN	17.3333	NaN	NaN	17.3333	123.167	1020266	1020267	1020263	1257.39	821.703	1244.07	833.421	8	22.1667	22.6667	1020246
2	23	NaN	NaN	21.8333	NaN	NaN	103.833	1020273	1020274	1020215	1036.62	377.496	1037.15	388.681	7	19.8333	20.3333	1020211
2	NaN	NaN	13.6667	NaN	NaN	13.6667	126.833	1020276	1020277	1020273	1266.18	229.96	1254.99	243.808	8	23	19.8333	1020215
2	NaN	NaN	14.8333	NaN	NaN	14.8333	125.667	1020281	1020282	1020274	1136.48	436.351	1118.37	450.199	8	21.8333	19.8333	1020215
2	NaN	NaN	4.83333	NaN	NaN	4.83333	135.667	1020288	1020287	1020235	1142.34	399.067	1158.85	405.459	8	27.3333	24.1667	1020231
2	21.8333	NaN	NaN	23.5	NaN	NaN	103.667	1020241	1020242	1020230	949.133	516.51	950.731	535.285	7	19.5	20.5	1020212
2	NaN	NaN	15	NaN	NaN	15	125.5	1020292	1020293	1020241	1103.46	500.798	1097.07	509.853	8	21.8333	19.5	1020230
2	NaN	NaN	13.3333	NaN	NaN	13.3333	127.167	1020298	1020299	1020242	771.636	588.681	756.723	575.898	8	23.5	19.5	1020230
2	NaN	NaN	18.1667	NaN	NaN	18.1667	122.333	1020303	1020304	1020249	1200.4	783.887	1179.62	787.615	8	22	22	1020245
3	31.6667	NaN	NaN	NaN	NaN	14.8333	13.8333	10302	10303	10301	341.943	349.933	329.161	369.107	2	NaN	NaN	103000
3	19	NaN	NaN	17.8333	NaN	NaN	45.5	10304	10305	10302	324.367	659.919	309.986	667.908	3	31.6667	NaN	10301
3	18	NaN	NaN	19.5	NaN	NaN	64.5	10307	10308	10304	370.039	864.845	360.452	855.791	4	19	31.6667	10302
3	14.8333	NaN	NaN	15.8333	NaN	NaN	82.5	10309	103010	10307	355.126	649.133	348.202	635.285	5	18	19	10304
3	13.6667	NaN	NaN	16.6667	NaN	NaN	97.3333	103011	103012	10309	378.029	571.37	372.702	561.251	6	14.8333	18	10307
3	14.8333	NaN	NaN	14	NaN	NaN	111	103013	103014	103011	274.7	631.024	270.439	617.709	7	13.6667	14.8333	10309
3	NaN	NaN	14.6667	NaN	NaN	14.6667	125.833	103015	103016	103013	386.018	776.43	380.159	788.68	8	14.8333	13.6667	103011
3	NaN	NaN	11.6667	NaN	NaN	10.1667	125	103018	103019	103014	78.429	708.787	69.374	722.103	8	14	13.6667	103011
3	16.5	NaN	NaN	21	NaN	NaN	114	103022	103023	103012	294.673	303.994	287.217	319.973	7	16.6667	14.8333	10309
3	NaN	NaN	10	NaN	NaN	9.33333	130.5	103024	103025	103022	257.39	530.891	254.194	520.239	8	16.5	16.6667	103012
3	NaN	NaN	0.333333	NaN	NaN	0.333333	135	103028	103029	103023	316.244	229.427	301.864	234.753	8	21	16.6667	103012
3	16.8333	NaN	NaN	16.3333	NaN	NaN	98.3333	103030	103031	103010	332.489	265.645	310.119	269.906	6	15.8333	18	10307
3	15.1667	NaN	NaN	16.6667	NaN	NaN	115.167	103032	103033	103030	429.959	305.059	412.915	300.798	7	16.8333	15.8333	103010
3	NaN	NaN	10.1667	NaN	NaN	10.1667	130.333	103034	103035	103032	565.512	364.447	564.446	376.164	8	15.1667	16.8333	103030
3	NaN	NaN	0.333333	NaN	NaN	0.333333	131.833	103037	103038	103033	744.473	342.609	730.624	319.706	8	16.6667	16.8333	103030
3	18.6667	NaN	NaN	16.8333	NaN	NaN	114.667	103039	103040	103031	333.022	470.705	314.913	464.313	7	16.3333	15.8333	103010
3	NaN	NaN	0.333333	NaN	NaN	0.333333	133.333	103041	103042	103039	269.374	256.857	256.591	243.009	8	18.6667	16.3333	103031
3	NaN	NaN	0.333333	NaN	NaN	0.333333	131.5	103043	103044	103040	184.154	245.672	166.578	246.205	8	16.8333	16.3333	103031
3	14.8333	NaN	NaN	15.5	NaN	NaN	84	103045	103046	10308	230.492	792.675	225.166	778.827	5	19.5	19	10304
3	15.1667	NaN	NaN	16.6667	NaN	NaN	98.8333	103047	103048	103045	245.672	586.018	228.628	589.746	6	14.8333	19.5	10308
3	NaN	NaN	1	NaN	NaN	1	114	103049	103050	103047	23.569	592.942	18.775	579.093	7	15.1667	14.8333	103045
3	NaN	NaN	13.1667	15.5	NaN	NaN	115.5	103053	103054	103048	194.54	575.365	185.486	560.984	7	16.6667	14.8333	103045
3	NaN	NaN	0.5	NaN	NaN	0.5	131	103056	103057	103054	439.546	690.944	427.829	689.346	8	15.5	16.6667	103048
3	NaN	NaN	11.6667	16	NaN	NaN	99.5	103058	103059	103046	240.878	606.79	226.498	602.529	6	15.5	19.5	10308
3	24.8333	NaN	NaN	22.8333	NaN	NaN	115.5	103061	103062	103059	253.661	567.376	240.878	560.984	7	16	15.5	103046
3	NaN	NaN	0.166667	NaN	NaN	0.166667	140.333	103063	103064	103061	521.038	740.212	510.385	747.136	8	24.8333	16	103059
3	NaN	NaN	0.333333	NaN	NaN	0.333333	138.333	103065	103066	103062	169.773	593.208	162.849	577.762	8	22.8333	16	103059
3	20	NaN	NaN	20.6667	NaN	NaN	63.3333	103067	103068	10305	365.246	546.337	349.8	539.946	4	17.8333	31.6667	10302
3	17	NaN	NaN	15.8333	NaN	NaN	83.3333	103069	103070	103067	299.733	425.965	281.624	408.921	5	20	17.8333	10305
3	NaN	NaN	0.333333	NaN	NaN	0.333333	100.333	103071	103072	103069	110.919	272.303	104.527	255.259	6	17	20	103067
3	NaN	NaN	0.333333	NaN	NaN	0.333333	99.1667	103073	103074	103070	235.818	515.179	220.372	507.189	6	15.8333	20	103067
3	15.6667	NaN	NaN	15.6667	NaN	NaN	84	103075	103076	103068	390.812	323.967	375.365	321.837	5	20.6667	17.8333	10305
3	NaN	NaN	0.333333	NaN	NaN	0.333333	99.6667	103077	103078	103075	183.355	146.072	173.768	154.594	6	15.6667	20.6667	103068
3	NaN	NaN	0.333333	NaN	NaN	0.333333	99.6667	103079	103080	103076	270.173	103.994	269.107	91.212	6	15.6667	20.6667	103068
4	19.5	NaN	NaN	17.5	NaN	NaN	6.66667	10402	10401	10403	588.015	416.244	560.851	413.048	2	NaN	NaN	104000
4	14.6667	NaN	NaN	17.3333	NaN	NaN	26.1667	10404	10405	10402	327.563	322.769	307.589	308.388	3	19.5	NaN	10403
4	14.6667	NaN	NaN	16.8333	NaN	NaN	40.8333	10406	10407	10404	237.283	459.387	214.913	461.783	4	14.6667	19.5	10402
4	14.5	NaN	NaN	15.5	NaN	NaN	55.5	10408	10409	10406	127.829	754.992	127.03	740.611	5	14.6667	14.6667	10404
4	21.8333	NaN	NaN	18.3333	NaN	NaN	70	104010	104011	10408	164.58	874.033	147.004	878.827	6	14.5	14.6667	10406
4	14.3333	NaN	NaN	14.5	NaN	NaN	91.8333	104012	104013	104010	296.404	1159.25	283.621	1172.04	7	21.8333	14.5	10408
4	16.3333	NaN	NaN	16.5	NaN	NaN	106.167	104014	104015	104012	237.283	1206.39	225.299	1205.59	8	14.3333	21.8333	104010
4	17.1667	NaN	NaN	14.8333	NaN	NaN	122.5	104016	104017	104014	249.933	1060.05	237.683	1054.19	9	16.3333	14.3333	104012
4	NaN	NaN	0.333333	NaN	NaN	0.333333	139.667	104018	104019	104016	260.585	1062.18	244.607	1076.03	10	17.1667	16.3333	104014
4	NaN	NaN	0.333333	NaN	NaN	0.333333	137.333	104020	104021	104017	233.422	1191.61	238.215	1175.63	10	14.8333	16.3333	104014
4	NaN	NaN	17.8333	NaN	NaN	17.8333	122.667	104022	104023	104015	343.674	1156.99	328.761	1168.71	9	16.5	14.3333	104012
4	16.3333	NaN	NaN	18.1667	NaN	NaN	106.333	104026	104027	104013	278.428	1069.11	267.243	1086.15	8	14.5	21.8333	104010
4	17.1667	NaN	NaN	15	NaN	NaN	122.667	104028	104029	104026	278.961	1314.64	276.298	1335.42	9	16.3333	14.5	104013
4	NaN	NaN	0.666667	NaN	NaN	0.666667	139.833	104030	104031	104028	352.463	1412.12	340.212	1404.12	10	17.1667	16.3333	104026
4	NaN	NaN	0.333333	NaN	NaN	0.333333	137.667	104032	104033	104029	65.646	1225.7	54.993	1213.98	10	15	16.3333	104026
4	14.6667	NaN	NaN	15.1667	NaN	NaN	124.5	104034	104035	104027	298.934	1013.71	293.075	998.8	9	18.1667	14.5	104013
4	NaN	NaN	0.166667	NaN	NaN	0.166667	139.167	104036	104037	104034	133.289	1220.1	131.691	1209.45	10	14.6667	18.1667	104027
4	NaN	NaN	0.333333	NaN	NaN	0.333333	139.667	104038	104039	104035	275.765	798.267	264.047	788.148	10	15.1667	18.1667	104027
4	18.1667	NaN	NaN	15.3333	NaN	NaN	88.3333	104040	104041	104011	151.132	997.468	137.283	992.142	7	18.3333	14.5	10408
4	18.8333	NaN	NaN	16.8333	NaN	NaN	106.5	104042	104043	104040	119.174	979.892	106.391	971.37	8	18.1667	18.3333	104011
4	NaN	NaN	15.1667	NaN	NaN	0.833333	125.333	104044	104045	104042	152.729	950.065	152.729	938.347	9	18.8333	18.1667	104040
4	NaN	NaN	0.333333	NaN	NaN	0.333333	123.333	104047	104048	104043	243.808	993.207	228.362	991.077	9	16.8333	18.1667	104040
4	20	NaN	NaN	16.6667	NaN	NaN	103.667	104049	104050	104041	318.375	819.04	311.451	827.562	8	15.3333	18.3333	104011
4	NaN	NaN	0.333333	NaN	NaN	0.333333	123.667	104051	104052	104049	437.416	669.906	431.024	658.188	9	20	15.3333	104041
4	NaN	NaN	0.5	NaN	NaN	0.5	120.333	104053	104054	104050	167.909	863.247	157.789	865.378	9	16.6667	15.3333	104041
4	17.8333	NaN	NaN	16.6667	NaN	NaN	24.1667	104055	104056	10401	586.95	454.859	586.95	474.034	3	17.5	NaN	10403
4	16	NaN	NaN	16.8333	NaN	NaN	42	104057	104058	104055	452.995	504.926	444.207	488.148	4	17.8333	17.5	10401
4	16.1667	NaN	NaN	16.6667	NaN	NaN	58	104059	104060	104057	547.269	592.808	533.687	584.819	5	16	17.8333	104055
4	15.8333	NaN	NaN	15.5	NaN	NaN	74.1667	104061	104062	104059	963.514	498.534	950.731	512.116	6	16.1667	16	104057
4	21	NaN	NaN	15.5	NaN	NaN	90	104063	104064	104061	897.202	411.451	896.403	428.228	7	15.8333	16.1667	104059
4	16	NaN	NaN	17.8333	NaN	NaN	111	104065	104066	104063	1060.98	488.947	1045.01	484.952	8	21	15.8333	104061
4	NaN	NaN	0.333333	NaN	NaN	8	127	104067	104068	104065	1261.65	663.248	1251.53	669.107	9	16	21	104063
4	NaN	NaN	0.333333	NaN	NaN	0.333333	128.833	104070	104071	104066	810.518	399.333	803.061	388.148	9	17.8333	21	104063
4	NaN	NaN	6.16667	18	NaN	NaN	105.5	104074	104075	104064	880.558	197.203	864.579	186.551	8	15.5	15.8333	104061
4	NaN	NaN	0.333333	NaN	NaN	0.333333	123.5	104077	104078	104075	903.46	181.225	884.286	190.812	9	18	15.5	104064
4	15.6667	NaN	NaN	16.3333	NaN	NaN	89.6667	104072	104073	104062	963.38	549	942.608	536.217	7	15.5	16.1667	104059
4	17.8333	NaN	NaN	16.6667	NaN	NaN	105.333	104079	104080	104072	824.632	451.264	824.1	464.58	8	15.6667	15.5	104062
4	16.6667	NaN	NaN	15.8333	NaN	NaN	123.167	104081	104082	104079	941.809	156.724	929.026	165.779	9	17.8333	15.6667	104072
4	NaN	NaN	0.666667	NaN	NaN	0.666667	139.833	104083	104084	104081	1064.31	97.07	1052.06	89.081	10	16.6667	17.8333	104079
4	NaN	NaN	1.5	NaN	NaN	1.5	139	104085	104086	104082	942.874	325.565	932.755	338.348	10	15.8333	17.8333	104079
4	17.1667	NaN	NaN	NaN	NaN	18.5	122	104087	104088	104080	850.731	557.789	839.546	545.006	9	16.6667	15.6667	104072
4	NaN	NaN	1.33333	NaN	NaN	1.33333	139.167	104089	104090	104087	989.213	515.711	987.615	530.625	10	17.1667	16.6667	104080
4	16.1667	NaN	NaN	18.3333	NaN	NaN	74.6667	104092	104093	104060	466.71	390.545	456.59	402.263	6	16.6667	16	104057
4	14.8333	NaN	NaN	16.1667	NaN	NaN	90.8333	104094	104095	104092	552.995	506.657	546.604	524.766	7	16.1667	16.6667	104060
4	17.1667	NaN	NaN	19.8333	NaN	NaN	105.667	104096	104097	104094	630.225	292.543	619.573	283.488	8	14.8333	16.1667	104092
4	16.8333	NaN	NaN	NaN	NaN	15.3333	122.833	104098	104099	104096	542.343	368.175	522.636	374.034	9	17.1667	14.8333	104094
4	NaN	NaN	0.833333	NaN	NaN	0.833333	139.667	1040100	1040101	104098	523.168	454.46	522.636	436.351	10	16.8333	17.1667	104096
4	18	NaN	NaN	16.1667	NaN	NaN	107	1040103	1040104	104095	352.196	644.606	337.816	654.193	8	16.1667	16.1667	104092
4	NaN	NaN	0.5	NaN	NaN	0.5	125	1040105	1040106	1040103	273.901	727.961	258.988	729.559	9	18	16.1667	104095
4	NaN	NaN	17.3333	NaN	NaN	17.3333	123.167	1040107	1040108	1040104	202.53	350.332	190.812	351.93	9	16.1667	16.1667	104095
4	16	NaN	NaN	16.5	NaN	NaN	93	1040111	1040112	104093	286.684	495.738	284.553	478.694	7	18.3333	16.6667	104060
4	18	NaN	NaN	17.3333	NaN	NaN	109	1040113	1040114	1040111	148.735	351.397	137.017	373.768	8	16	18.3333	104093
4	NaN	NaN	0.333333	NaN	NaN	0.333333	127	1040115	1040116	1040113	263.781	203.861	245.672	209.72	9	18	16	1040111
4	NaN	NaN	0.333333	NaN	NaN	0.333333	126.333	1040117	1040118	1040114	206.258	421.704	196.671	433.421	9	17.3333	16	1040111
4	NaN	NaN	15	NaN	NaN	15	125.5	1040119	1040120	104097	653.661	256.058	636.617	257.123	9	19.8333	14.8333	104094
4	18.8333	NaN	NaN	16.1667	NaN	NaN	40.8333	1040123	1040124	104056	387.083	777.229	372.702	781.49	4	16.6667	17.5	10401
4	16.8333	NaN	NaN	17	NaN	NaN	57	1040127	1040128	1040124	432.09	628.095	419.307	637.682	5	16.1667	16.6667	104056
4	18	NaN	NaN	15.8333	NaN	NaN	73.8333	1040129	1040130	1040127	457.123	691.477	441.144	684.553	6	16.8333	16.1667	1040124
4	16.6667	NaN	NaN	17.5	NaN	NaN	91.8333	1040131	1040132	1040129	551.93	523.168	549.799	533.288	7	18	16.8333	1040127
4	19.3333	NaN	NaN	19.5	NaN	NaN	108.5	1040133	1040134	1040131	537.016	557.789	518.907	554.06	8	16.6667	18	1040129
4	NaN	NaN	0.833333	NaN	NaN	0.833333	127.833	1040135	1040136	1040133	342.609	534.353	323.435	539.147	9	19.3333	16.6667	1040131
4	NaN	NaN	0.333333	NaN	NaN	0.333333	128	1040137	1040138	1040134	714.379	532.223	708.521	518.375	9	19.5	16.6667	1040131
4	16	NaN	NaN	16.6667	NaN	NaN	109.333	1040139	1040140	1040132	493.874	570.572	485.885	552.995	8	17.5	18	1040129
4	NaN	NaN	0.5	NaN	NaN	0.5	125.333	1040141	1040142	1040139	560.984	353.262	545.006	344.74	9	16	17.5	1040132
4	NaN	NaN	0.333333	NaN	NaN	0.333333	126	1040143	1040144	1040140	483.221	546.604	471.504	534.353	9	16.6667	17.5	1040132
4	15.6667	NaN	NaN	16.3333	NaN	NaN	59.6667	1040125	1040126	1040123	414.513	768.174	398.002	767.109	5	18.8333	16.6667	104056
4	15	NaN	NaN	15.1667	NaN	NaN	75.3333	1040146	1040145	1040125	416.644	867.775	419.307	883.753	6	15.6667	18.8333	1040123
4	16.3333	NaN	NaN	16.1667	NaN	NaN	90.3333	1040147	1040148	1040146	519.44	930.091	503.461	927.961	7	15	15.6667	1040125
4	16.5	NaN	NaN	17.1667	NaN	NaN	106.667	1040149	1040150	1040147	405.459	965.245	395.339	952.994	8	16.3333	15	1040146
4	NaN	NaN	0.333333	NaN	NaN	0.333333	123.167	1040151	1040152	1040149	241.411	920.771	237.683	906.39	9	16.5	16.3333	1040147
4	NaN	NaN	0.333333	NaN	NaN	0.333333	123.833	1040153	1040154	1040150	165.246	815.844	157.789	808.92	9	17.1667	16.3333	1040147
4	15	NaN	NaN	17	NaN	NaN	106.5	1040155	1040156	1040148	565.778	981.49	549.799	982.555	8	16.1667	15	1040146
4	15.5	NaN	NaN	17.5	NaN	NaN	121.5	1040157	1040158	1040155	432.356	740.478	421.704	749.533	9	15	16.1667	1040148
4	NaN	NaN	0.333333	NaN	NaN	0.333333	137	1040159	1040160	1040157	425.965	934.885	412.649	928.494	10	15.5	15	1040155
4	NaN	NaN	0.333333	NaN	NaN	0.333333	139	1040161	1040162	1040158	296.005	868.307	293.874	883.221	10	17.5	15	1040155
4	NaN	NaN	17	NaN	NaN	9.83333	123.5	1040163	1040164	1040156	445.672	1110.92	435.019	1116.78	9	17	16.1667	1040148
4	19.1667	NaN	NaN	14.3333	NaN	NaN	76	1040542	1040543	1040126	487.349	721.437	480.958	735.019	6	16.3333	18.8333	1040123
4	18.8333	NaN	NaN	20.6667	NaN	NaN	95.1667	1040545	1040546	1040542	561.251	933.554	547.269	930.757	7	19.1667	16.3333	1040126
4	16.5	NaN	NaN	18.8333	NaN	NaN	114	1040548	1040549	1040545	462.183	890.012	448.601	886.816	8	18.8333	19.1667	1040542
4	NaN	NaN	10	NaN	NaN	10	130.5	1040551	1040552	1040548	569.639	998.267	561.251	998.267	9	16.5	18.8333	1040545
4	NaN	NaN	7.66667	NaN	NaN	7.66667	132.833	1040556	1040557	1040549	420.638	923.966	425.032	937.149	9	18.8333	18.8333	1040545
4	15.8333	NaN	NaN	17.5	NaN	NaN	115.833	1040560	1040561	1040546	556.457	792.142	547.269	800.931	8	20.6667	19.1667	1040542
4	NaN	NaN	8.83333	NaN	NaN	8.83333	131.667	1040563	1040564	1040560	701.064	754.992	684.686	753.394	9	15.8333	20.6667	1040546
4	16.8333	NaN	NaN	15.5	NaN	NaN	90.3333	1040568	1040569	1040543	178.961	678.694	171.371	689.08	7	14.3333	16.3333	1040126
4	17.3333	NaN	NaN	16.8333	NaN	NaN	107.167	1040571	1040572	1040568	248.468	563.647	236.085	569.639	8	16.8333	14.3333	1040543
4	NaN	NaN	16	NaN	NaN	16	124.5	1040574	1040575	1040571	419.44	408.654	411.451	402.263	9	17.3333	16.8333	1040568
4	NaN	NaN	16.5	NaN	NaN	16.5	124	1040580	1040581	1040572	70.706	479.759	61.917	464.18	9	16.8333	16.8333	1040568
4	13.3333	NaN	NaN	18	NaN	NaN	105.833	1040585	1040586	1040569	207.323	739.812	202.929	768.574	8	15.5	14.3333	1040543
4	NaN	NaN	16.6667	NaN	NaN	16.6667	123.833	1040589	1040590	1040586	346.87	699.732	330.892	718.374	9	18	15.5	1040569
4	NaN	NaN	7.16667	NaN	NaN	7.16667	133.333	1040595	1040596	1040561	751.796	721.437	736.616	727.828	9	17.5	20.6667	1040546
4	13	NaN	NaN	15	NaN	NaN	119.167	1040601	1040600	1040585	44.74	835.285	50.732	821.303	9	13.3333	15.5	1040569
4	NaN	NaN	0.5	NaN	NaN	2.33333	132.167	1040603	1040604	1040601	18.775	1011.45	1.598	1003.86	10	13	13.3333	1040585
4	NaN	NaN	1	NaN	NaN	6.33333	134.167	1040607	1040608	1040600	16.778	650.731	13.582	665.112	10	15	13.3333	1040585
4	18	NaN	NaN	17.1667	NaN	NaN	74	1040170	1040171	1040128	488.015	578.295	480.558	593.741	6	17	16.1667	1040124
4	17.3333	NaN	NaN	15.6667	NaN	NaN	92	1040172	1040173	1040170	619.04	654.992	619.573	668.308	7	18	17	1040128
4	16.3333	NaN	NaN	18.1667	NaN	NaN	109.333	1040174	1040175	1040172	480.026	687.482	461.917	705.591	8	17.3333	18	1040170
4	NaN	NaN	0.333333	NaN	NaN	0.333333	125.667	1040176	1040177	1040174	559.919	543.674	542.343	544.739	9	16.3333	17.3333	1040172
4	NaN	NaN	0.333333	NaN	NaN	0.333333	127.5	1040178	1040179	1040175	322.37	569.24	299.467	566.044	9	18.1667	17.3333	1040172
4	15.1667	NaN	NaN	16	NaN	NaN	107.667	1040180	1040181	1040173	727.162	784.419	714.912	791.876	8	15.6667	18	1040170
4	NaN	NaN	17.6667	NaN	NaN	0.5	122.833	1040182	1040183	1040180	737.815	672.036	734.087	658.188	9	15.1667	15.6667	1040173
4	NaN	NaN	16.8333	NaN	NaN	16.8333	123.667	1040185	1040186	1040181	571.903	1105.59	563.914	1110.38	9	16	15.6667	1040173
4	15.1667	NaN	NaN	16.1667	NaN	NaN	91.1667	1040189	1040190	1040171	577.762	637.682	563.381	646.736	7	17.1667	17	1040128
4	16.5	NaN	NaN	17.8333	NaN	NaN	106.333	1040191	1040192	1040189	652.329	566.843	647.535	581.757	8	15.1667	17.1667	1040171
4	NaN	NaN	0.5	NaN	NaN	0.5	122.833	1040193	1040194	1040191	433.954	533.288	419.573	531.157	9	16.5	15.1667	1040189
4	NaN	NaN	0.333333	NaN	NaN	0.333333	124.167	1040195	1040196	1040192	898.933	570.838	895.205	545.805	9	17.8333	15.1667	1040189
4	16.3333	NaN	NaN	16.3333	NaN	NaN	107.333	1040197	1040198	1040190	648.334	562.582	640.878	554.06	8	16.1667	17.1667	1040171
4	NaN	NaN	0.333333	NaN	NaN	0.333333	123.667	1040199	1040200	1040197	688.814	579.093	677.096	591.876	9	16.3333	16.1667	1040190
4	NaN	NaN	0.333333	NaN	NaN	0.333333	123.667	1040201	1040202	1040198	448.601	625.432	439.014	642.476	9	16.3333	16.1667	1040190
4	15.8333	NaN	NaN	16.1667	NaN	NaN	90.5	1040203	1040204	1040145	438.748	1079.76	424.367	1068.04	7	15.1667	15.6667	1040125
4	15.6667	NaN	NaN	16	NaN	NaN	106.333	1040205	1040206	1040203	477.363	986.549	456.058	979.093	8	15.8333	15.1667	1040145
4	13.8333	NaN	NaN	13.6667	NaN	NaN	122	1040207	1040208	1040205	634.486	848.6	625.432	834.752	9	15.6667	15.8333	1040203
4	NaN	NaN	0.333333	NaN	NaN	0.333333	135.833	1040209	1040210	1040207	639.812	645.671	624.366	646.204	10	13.8333	15.6667	1040205
4	NaN	NaN	0.333333	NaN	NaN	0.333333	135.667	1040211	1040212	1040208	612.649	522.103	608.92	544.473	10	13.6667	15.6667	1040205
4	16.3333	NaN	NaN	15.5	NaN	NaN	106.667	1040213	1040214	1040204	511.45	851.53	498.135	837.149	8	16.1667	15.1667	1040145
4	17	NaN	NaN	16.6667	NaN	NaN	123	1040215	1040216	1040213	358.055	753.261	352.729	737.815	9	16.3333	16.1667	1040204
4	NaN	NaN	0.5	NaN	NaN	0.5	140	1040217	1040218	1040215	347.935	948.733	337.816	959.386	10	17	16.3333	1040213
4	NaN	NaN	0.833333	NaN	NaN	0.833333	139.667	1040219	1040220	1040216	421.437	692.009	405.991	696.27	10	16.6667	16.3333	1040213
4	17.1667	NaN	NaN	15.5	NaN	NaN	122.333	1040221	1040222	1040206	432.622	800.132	417.709	794.805	9	16	15.8333	1040203
4	NaN	NaN	1	NaN	NaN	1	139.5	1040223	1040224	1040221	454.992	721.836	440.612	730.358	10	17.1667	16	1040206
4	NaN	NaN	0.5	NaN	NaN	0.5	137.833	1040225	1040226	1040222	547.136	716.51	533.288	727.162	10	15.5	16	1040206
4	16.1667	NaN	NaN	14.6667	NaN	NaN	122.167	1040227	1040228	1040214	557.256	847.002	540.212	844.872	9	15.5	16.1667	1040204
4	NaN	NaN	0.333333	NaN	NaN	0.333333	138.333	1040229	1040230	1040227	649.932	653.128	638.747	658.454	10	16.1667	15.5	1040214
4	NaN	NaN	0.333333	NaN	NaN	0.333333	136.833	1040231	1040232	1040228	514.114	807.056	516.777	818.773	10	14.6667	15.5	1040214
4	15.8333	NaN	NaN	19.8333	NaN	NaN	58.8333	1040233	1040234	104058	395.072	491.211	383.887	499.733	5	16.8333	17.8333	104055
4	16.1667	NaN	NaN	17.5	NaN	NaN	74.6667	1040235	1040236	1040233	396.67	458.188	381.224	460.319	6	15.8333	16.8333	104058
4	14.6667	NaN	NaN	18	NaN	NaN	90.8333	1040237	1040238	1040235	430.758	221.171	422.236	232.889	7	16.1667	15.8333	1040233
4	13.1667	NaN	NaN	13	NaN	NaN	105.5	1040239	1040240	1040237	551.131	510.918	545.272	499.733	8	14.6667	16.1667	1040235
4	15.1667	NaN	NaN	14.8333	NaN	NaN	118.667	1040241	1040242	1040239	567.109	490.678	555.392	482.689	9	13.1667	14.6667	1040237
4	NaN	NaN	0.333333	NaN	NaN	0.333333	133.833	1040243	1040244	1040241	529.826	635.551	525.565	644.606	10	15.1667	13.1667	1040239
4	NaN	NaN	0.333333	NaN	NaN	0.333333	133.5	1040245	1040246	1040242	845.937	473.102	835.285	480.558	10	14.8333	13.1667	1040239
4	13.8333	NaN	NaN	16.5	NaN	NaN	118.5	1040247	1040248	1040240	535.951	472.036	538.614	492.276	9	13	14.6667	1040237
4	NaN	NaN	0.333333	NaN	NaN	0.333333	132.333	1040249	1040250	1040247	559.253	548.068	550.465	557.655	10	13.8333	13	1040240
4	NaN	NaN	0.333333	NaN	NaN	0.333333	135	1040251	1040252	1040248	496.138	396.271	485.751	401.863	10	16.5	13	1040240
4	14	NaN	NaN	15.5	NaN	NaN	92.1667	1040253	1040254	1040236	449.799	495.339	435.419	494.54	7	17.5	15.8333	1040233
4	14.3333	NaN	NaN	14.1667	NaN	NaN	106.167	1040255	1040256	1040253	568.974	525.565	554.593	528.228	8	14	17.5	1040236
4	15.8333	NaN	NaN	14.3333	NaN	NaN	120.5	1040257	1040258	1040255	741.277	470.971	726.896	472.569	9	14.3333	14	1040253
4	NaN	NaN	0.333333	NaN	NaN	0.333333	136.333	1040259	1040260	1040257	905.325	446.471	905.325	436.883	10	15.8333	14.3333	1040255
4	NaN	NaN	0.333333	NaN	NaN	0.333333	134.833	1040261	1040262	1040258	925.564	441.144	912.781	439.546	10	14.3333	14.3333	1040255
4	16.3333	NaN	NaN	15	NaN	NaN	120.333	1040263	1040264	1040256	453.661	697.069	438.215	693.874	9	14.1667	14	1040253
4	NaN	NaN	0.333333	NaN	NaN	0.333333	136.667	1040265	1040266	1040263	621.703	739.146	608.92	737.016	10	16.3333	14.1667	1040256
4	15.6667	NaN	NaN	15.3333	NaN	NaN	107.667	1040267	1040268	1040254	412.915	584.42	394.806	587.083	8	15.5	17.5	1040236
4	15.5	NaN	NaN	16	NaN	NaN	123.333	1040269	1040270	1040267	333.555	411.317	330.359	431.024	9	15.6667	15.5	1040254
4	NaN	NaN	0.333333	NaN	NaN	0.333333	139.333	1040272	1040273	1040270	366.311	233.688	355.658	244.873	10	16	15.6667	1040267
4	NaN	NaN	0.333333	NaN	NaN	0.333333	138.833	1040274	1040275	1040269	350.865	635.285	341.278	625.698	10	15.5	15.6667	1040267
4	NaN	NaN	0.333333	NaN	NaN	0.333333	135.333	1040276	1040277	1040264	554.859	686.949	546.87	692.276	10	15	14.1667	1040256
4	17.1667	NaN	NaN	24	NaN	NaN	78.6667	1040278	1040279	1040234	172.703	483.488	168.974	501.064	6	19.8333	16.8333	104058
4	15.3333	NaN	NaN	15.1667	NaN	NaN	95.8333	1040280	1040281	1040278	397.469	584.153	393.208	602.795	7	17.1667	19.8333	1040234
4	15.5	NaN	NaN	15.1667	NaN	NaN	111.167	1040282	1040283	1040280	428.361	625.165	419.839	614.513	8	15.3333	17.1667	1040278
4	NaN	NaN	0.333333	NaN	NaN	0.333333	126.667	1040284	1040285	1040282	613.714	653.128	604.127	644.073	9	15.5	15.3333	1040280
4	NaN	NaN	0.333333	NaN	NaN	0.333333	126.333	1040286	1040287	1040283	480.558	509.853	465.645	515.711	9	15.1667	15.3333	1040280
4	12.8333	NaN	NaN	13.1667	NaN	NaN	111	1040288	1040289	1040281	303.195	723.434	290.945	722.369	8	15.1667	17.1667	1040278
4	14.1667	NaN	NaN	NaN	NaN	16.6667	123.833	1040290	1040291	1040288	323.967	687.216	312.782	682.955	9	12.8333	15.1667	1040281
4	NaN	NaN	0.333333	NaN	NaN	0.333333	138	1040292	1040293	1040290	412.383	520.505	408.122	536.484	10	14.1667	12.8333	1040288
4	NaN	NaN	16.3333	NaN	NaN	16.3333	124.167	1040295	1040296	1040289	326.631	460.585	317.043	469.107	9	13.1667	15.1667	1040281
4	16.3333	NaN	NaN	15.6667	NaN	NaN	102.667	1040299	1040300	1040279	283.488	543.674	261.118	538.348	7	24	19.8333	1040234
4	16.1667	NaN	NaN	17.6667	NaN	NaN	119	1040301	1040302	1040299	88.016	537.815	73.102	530.891	8	16.3333	24	1040279
4	NaN	NaN	0.333333	NaN	NaN	0.333333	135.167	1040303	1040304	1040301	116.777	613.448	111.984	625.165	9	16.1667	16.3333	1040299
4	NaN	NaN	0.333333	NaN	NaN	0.333333	136.667	1040305	1040306	1040302	11.318	431.823	3.329	434.487	9	17.6667	16.3333	1040299
4	13.6667	NaN	NaN	NaN	NaN	8.5	118.333	1040307	1040308	1040300	133.289	583.088	135.952	595.338	8	15.6667	24	1040279
4	NaN	NaN	0.333333	NaN	NaN	0.333333	132	1040309	1040310	1040307	141.811	715.711	129.56	720.505	9	13.6667	15.6667	1040300
4	16.8333	NaN	NaN	18.5	NaN	NaN	108.833	1040313	1040312	1040238	350.599	395.339	364.979	404.393	8	18	16.1667	1040235
4	NaN	NaN	0.666667	NaN	NaN	14.8333	125.667	1040314	1040315	1040313	573.235	330.892	561.517	320.772	9	16.8333	18	1040238
4	NaN	NaN	0.333333	NaN	NaN	0.333333	127.333	1040317	1040318	1040312	159.92	356.457	152.996	356.457	9	18.5	18	1040238
4	15.6667	NaN	NaN	16.1667	NaN	NaN	43.5	1040319	1040320	10405	560.452	118.908	543.94	116.777	4	17.3333	19.5	10402
4	NaN	NaN	3.16667	16.6667	NaN	NaN	59.1667	1040322	1040321	1040319	452.329	44.341	464.047	59.787	5	15.6667	17.3333	10405
4	15.6667	NaN	NaN	NaN	NaN	10.8333	75.8333	1040324	1040325	1040321	328.228	144.207	313.848	121.305	6	16.6667	15.6667	1040319
4	16.1667	NaN	NaN	15.5	NaN	NaN	91.5	1040326	1040327	1040324	204.127	185.752	199.334	171.904	7	15.6667	16.6667	1040321
4	21.1667	NaN	NaN	19.8333	NaN	NaN	107.667	1040328	1040329	1040326	292.543	151.664	294.673	168.708	8	16.1667	15.6667	1040324
4	NaN	NaN	0.333333	NaN	NaN	0.333333	128.833	1040330	1040331	1040328	127.43	145.805	125.299	160.186	9	21.1667	16.1667	1040326
4	NaN	NaN	0.333333	NaN	NaN	0.333333	127.5	1040332	1040333	1040329	423.568	215.046	410.252	213.981	9	19.8333	16.1667	1040326
4	NaN	NaN	4.66667	NaN	NaN	11.3333	107	1040334	1040335	1040327	226.498	57.923	222.237	66.977	8	15.5	15.6667	1040324
4	15.8333	NaN	NaN	15.6667	NaN	NaN	59.6667	1040339	1040340	1040320	593.208	321.304	572.968	326.631	5	16.1667	17.3333	10405
4	17.3333	NaN	NaN	16.6667	NaN	NaN	75.5	1040341	1040342	1040339	574.034	333.555	575.099	353.794	6	15.8333	16.1667	1040320
4	17	NaN	NaN	15.8333	NaN	NaN	92.8333	1040343	1040344	1040341	751.13	90.679	741.011	75.233	7	17.3333	15.8333	1040339
4	16.1667	NaN	NaN	17	NaN	NaN	109.833	1040345	1040346	1040343	632.356	230.759	625.432	214.78	8	17	17.3333	1040341
4	NaN	NaN	0.333333	NaN	NaN	0.333333	126	1040347	1040348	1040345	759.652	345.805	755.391	359.653	9	16.1667	17	1040343
4	NaN	NaN	0.333333	NaN	NaN	0.333333	126.833	1040349	1040350	1040346	687.216	190.279	672.302	185.486	9	17	17	1040343
4	14.6667	NaN	NaN	17	NaN	NaN	92.1667	1040351	1040352	1040342	656.856	598.534	644.606	611.85	7	16.6667	15.8333	1040339
4	16.1667	NaN	NaN	16.6667	NaN	NaN	106.833	1040353	1040354	1040351	694.672	573.501	685.618	579.36	8	14.6667	16.6667	1040342
4	16	NaN	NaN	17	NaN	NaN	123	1040355	1040356	1040353	587.083	802.262	583.354	815.045	9	16.1667	14.6667	1040351
4	NaN	NaN	0.333333	NaN	NaN	0.333333	139	1040357	1040358	1040355	815.045	688.281	803.327	690.944	10	16	16.1667	1040353
4	NaN	NaN	17	NaN	NaN	0.333333	123.5	1040359	1040360	1040354	622.768	766.576	611.583	756.457	9	16.6667	14.6667	1040351
4	16.1667	NaN	NaN	14.8333	NaN	NaN	109.167	1040362	1040363	1040352	612.116	454.46	601.996	459.253	8	17	16.6667	1040342
4	NaN	NaN	0.333333	NaN	NaN	0.333333	125.333	1040364	1040365	1040362	701.064	440.612	698.401	454.46	9	16.1667	17	1040352
4	NaN	NaN	0.666667	NaN	NaN	16.5	124	1040366	1040367	1040363	664.313	448.068	656.856	436.351	9	14.8333	17	1040352
4	13.3333	NaN	NaN	14.8333	NaN	NaN	108.667	1040369	1040370	1040344	628.627	171.637	614.247	167.909	8	15.8333	17.3333	1040341
4	13.8333	NaN	NaN	NaN	NaN	18.5	122	1040371	1040372	1040369	599.333	239.281	582.822	239.281	9	13.3333	15.8333	1040344
4	NaN	NaN	0.333333	NaN	NaN	0.333333	135.833	1040373	1040374	1040371	534.353	236.085	524.766	223.834	10	13.8333	13.3333	1040369
4	NaN	NaN	0.333333	NaN	NaN	0.333333	123.5	1040376	1040377	1040370	691.477	180.692	688.281	167.909	9	14.8333	15.8333	1040344
4	18.6667	NaN	NaN	16.3333	NaN	NaN	75.3333	1040378	1040379	1040340	572.702	434.487	567.908	454.726	6	15.6667	16.1667	1040320
4	17.1667	NaN	NaN	17.1667	NaN	NaN	94	1040380	1040381	1040378	701.33	357.256	689.613	370.572	7	18.6667	15.6667	1040340
4	17.5	NaN	NaN	NaN	NaN	9.66667	111.167	1040382	1040383	1040380	776.963	250.998	765.245	261.651	8	17.1667	18.6667	1040378
4	NaN	NaN	0.333333	NaN	NaN	0.333333	128.667	1040384	1040385	1040382	601.73	125.299	587.882	108.255	9	17.5	17.1667	1040380
4	19.3333	NaN	NaN	19.1667	NaN	NaN	111.167	1040386	1040387	1040381	1101.06	156.724	1100	173.768	8	17.1667	18.6667	1040378
4	NaN	NaN	0.333333	NaN	NaN	0.333333	130.5	1040389	1040388	1040386	1181.49	113.582	1184.15	129.56	9	19.3333	17.1667	1040381
4	NaN	NaN	0.333333	NaN	NaN	0.333333	130.333	1040390	1040391	1040387	978.56	273.901	964.179	280.292	9	19.1667	17.1667	1040381
4	16.5	NaN	NaN	18.5	NaN	NaN	57.6667	1040392	1040393	10407	325.565	563.647	319.706	549.799	5	16.8333	14.6667	10404
4	17	NaN	NaN	17	NaN	NaN	74.1667	1040395	1040394	1040392	255.259	505.059	262.183	518.907	6	16.5	16.8333	10407
4	NaN	NaN	0.333333	NaN	NaN	0.333333	91.1667	1040396	1040397	1040395	101.864	643.008	89.614	651.53	7	17	16.5	1040392
4	18.8333	NaN	NaN	17.1667	NaN	NaN	76.1667	1040398	1040399	1040393	322.37	440.079	286.151	421.437	6	18.5	16.8333	10407
4	18.1667	NaN	NaN	17.3333	NaN	NaN	95	1040400	1040401	1040398	352.729	492.276	323.435	488.015	7	18.8333	18.5	1040393
4	15.3333	NaN	NaN	17.3333	NaN	NaN	113.167	1040402	1040403	1040400	213.182	519.972	204.66	522.103	8	18.1667	18.8333	1040398
4	NaN	NaN	0.333333	NaN	NaN	0.333333	128.5	1040404	1040405	1040402	150.333	665.911	142.343	662.715	9	15.3333	18.1667	1040400
4	NaN	NaN	0.333333	NaN	NaN	0.333333	130.5	1040406	1040407	1040403	151.398	603.594	136.484	602.529	9	17.3333	18.1667	1040400
4	15	NaN	NaN	15.1667	NaN	NaN	112.333	1040409	1040408	1040401	230.759	384.686	240.346	398.535	8	17.3333	18.8333	1040398
4	NaN	NaN	0.333333	NaN	NaN	0.333333	127.333	1040410	1040411	1040409	27.297	475.232	27.297	488.548	9	15	17.3333	1040401
4	NaN	NaN	0.333333	NaN	NaN	0.333333	127.5	1040412	1040413	1040408	169.507	233.422	157.789	244.074	9	15.1667	17.3333	1040401
4	NaN	NaN	4.33333	15.6667	NaN	NaN	91.1667	1040414	1040415	1040394	70.972	549.799	63.515	548.734	7	17	16.5	1040392
4	17	NaN	NaN	15.1667	NaN	NaN	106.833	1040417	1040418	1040415	137.55	431.024	139.148	445.405	8	15.6667	17	1040394
4	NaN	NaN	9.5	NaN	NaN	0.333333	123.833	1040419	1040420	1040417	13.449	320.772	15.579	334.62	9	17	15.6667	1040415
4	NaN	NaN	13.1667	NaN	NaN	0.333333	122	1040422	1040423	1040418	240.346	575.898	238.748	591.344	9	15.1667	15.6667	1040415
4	16.1667	NaN	NaN	15.5	NaN	NaN	93.3333	1040425	1040426	1040399	268.042	388.947	254.727	387.882	7	17.1667	18.5	1040393
4	16	NaN	NaN	16.5	NaN	NaN	109.5	1040428	1040427	1040425	294.673	434.22	297.869	417.709	8	16.1667	17.1667	1040399
4	NaN	NaN	0.333333	NaN	NaN	0.333333	125.5	1040429	1040430	1040428	344.207	683.487	332.489	695.205	9	16	16.1667	1040425
4	NaN	NaN	0.333333	NaN	NaN	0.333333	126	1040431	1040432	1040427	269.64	434.22	258.455	436.883	9	16.5	16.1667	1040425
4	14.6667	NaN	NaN	17.1667	NaN	NaN	108.833	1040433	1040434	1040426	204.127	369.773	199.866	355.392	8	15.5	17.1667	1040399
4	NaN	NaN	0.333333	NaN	NaN	17	123.5	1040435	1040436	1040433	203.062	536.484	181.225	533.288	9	14.6667	15.5	1040426
4	NaN	NaN	0.333333	NaN	NaN	0.333333	126	1040438	1040439	1040434	188.149	214.247	185.486	223.302	9	17.1667	15.5	1040426
4	17.1667	NaN	NaN	15.3333	NaN	NaN	71	1040440	1040441	10409	65.113	630.492	49.134	620.904	6	15.5	14.6667	10406
4	15	NaN	NaN	16.3333	NaN	NaN	88.1667	1040442	1040443	1040440	157.257	557.522	145.539	566.577	7	17.1667	15.5	10409
4	14.6667	NaN	NaN	NaN	NaN	10.3333	103.167	1040444	1040445	1040442	156.724	403.062	139.148	408.921	8	15	17.1667	1040440
4	16.1667	NaN	NaN	14.8333	NaN	NaN	117.833	1040446	1040447	1040444	240.878	429.427	224.9	433.155	9	14.6667	15	1040442
4	NaN	NaN	0.333333	NaN	NaN	0.333333	134	1040448	1040449	1040446	360.186	604.127	362.849	611.583	10	16.1667	14.6667	1040444
4	NaN	NaN	0.333333	NaN	NaN	0.333333	132.667	1040450	1040451	1040447	233.954	575.365	224.9	584.42	10	14.8333	14.6667	1040444
4	NaN	NaN	4	16	NaN	NaN	104.5	1040452	1040453	1040443	81.092	585.219	75.233	572.436	8	16.3333	17.1667	1040440
4	15.5	NaN	NaN	18.5	NaN	NaN	120.5	1040455	1040456	1040453	201.997	652.862	203.595	637.948	9	16	16.3333	1040443
4	NaN	NaN	0.333333	NaN	NaN	0.333333	136	1040457	1040458	1040455	333.022	483.488	322.37	488.814	10	15.5	16	1040453
4	NaN	NaN	0.333333	NaN	NaN	0.333333	139	1040459	1040460	1040456	173.768	362.05	171.105	380.159	10	18.5	16	1040453
4	14.5	NaN	NaN	13.6667	NaN	NaN	86.3333	1040461	1040462	1040441	423.568	547.136	402.796	547.669	7	15.3333	15.5	10409
4	16.3333	NaN	NaN	16	NaN	NaN	100.833	1040463	1040464	1040461	331.424	689.879	313.848	692.009	8	14.5	15.3333	1040441
4	19.3333	NaN	NaN	15.6667	NaN	NaN	117.167	1040465	1040466	1040463	252.063	736.75	241.944	749	9	16.3333	14.5	1040461
4	NaN	NaN	0.333333	NaN	NaN	0.333333	136.5	1040467	1040468	1040465	383.621	780.957	376.164	771.903	10	19.3333	16.3333	1040463
4	NaN	NaN	0.333333	NaN	NaN	0.333333	132.833	1040469	1040470	1040466	189.747	769.772	188.681	753.794	10	15.6667	16.3333	1040463
4	14.5	NaN	NaN	13.5	NaN	NaN	100	1040471	1040472	1040462	396.138	725.298	379.626	719.439	8	13.6667	15.3333	1040441
4	17.1667	NaN	NaN	18.1667	NaN	NaN	114.5	1040473	1040474	1040471	406.258	822.768	392.942	807.855	9	14.5	13.6667	1040462
4	NaN	NaN	0.333333	NaN	NaN	0.333333	131.667	1040475	1040476	1040473	365.778	1129.03	354.593	1111.45	10	17.1667	14.5	1040471
4	NaN	NaN	0.333333	NaN	NaN	0.333333	132.667	1040477	1040478	1040474	526.63	1093.87	526.63	1107.19	10	18.1667	14.5	1040471
4	16.5	NaN	NaN	NaN	NaN	15.5	113.5	1040479	1040480	1040472	165.246	781.756	159.387	767.908	9	13.5	13.6667	1040462
4	NaN	NaN	0.333333	NaN	NaN	0.333333	130	1040481	1040482	1040479	242.476	539.413	240.878	550.598	10	16.5	13.5	1040472
4	19.1667	NaN	NaN	15.5	NaN	NaN	89.6667	1040488	1040489	1040130	519.44	523.967	502.396	534.62	7	15.8333	16.8333	1040127
4	16.3333	NaN	NaN	17	NaN	NaN	108.833	1040490	1040491	1040488	400.665	644.872	401.73	662.449	8	19.1667	15.8333	1040130
4	NaN	NaN	0.333333	NaN	NaN	0.333333	125.167	1040492	1040493	1040490	532.223	708.254	518.907	702.395	9	16.3333	19.1667	1040488
4	18	NaN	NaN	16.1667	NaN	NaN	105.167	1040494	1040495	1040489	341.011	645.405	346.87	664.579	8	15.5	15.8333	1040130
4	NaN	NaN	0.333333	NaN	NaN	0.333333	123.167	1040496	1040497	1040494	656.59	595.072	644.34	601.996	9	18	15.5	1040489
4	NaN	NaN	0.333333	NaN	NaN	0.333333	125.833	1040499	1040498	1040491	260.852	937.548	283.754	950.331	9	17	19.1667	1040488
4	18.8333	NaN	NaN	16.8333	NaN	NaN	121.333	1040500	1040501	1040495	371.105	411.317	354.061	411.85	9	16.1667	15.5	1040489
4	NaN	NaN	0.333333	NaN	NaN	0.333333	140.167	1040502	1040503	1040500	332.756	478.428	328.495	491.743	10	18.8333	16.1667	1040495
4	NaN	NaN	0.333333	NaN	NaN	0.333333	138.167	1040504	1040505	1040501	383.355	398.535	370.572	388.947	10	16.8333	16.1667	1040495
4	NaN	NaN	0.5	NaN	NaN	0.5	91.6667	1040506	1040507	1040379	351.93	380.958	355.126	401.198	7	16.3333	15.6667	1040340
4	14.5	NaN	NaN	16	NaN	NaN	106	1040509	1040510	104073	976.163	352.995	960.717	355.126	8	16.3333	15.5	104062
4	16.6667	NaN	NaN	NaN	NaN	20	120.5	1040511	1040512	1040509	1087.48	408.388	1084.29	398.268	9	14.5	16.3333	104073
4	NaN	NaN	0.333333	NaN	NaN	0.333333	137.167	1040513	1040514	1040511	1258.99	257.656	1244.61	253.395	10	16.6667	14.5	1040509
4	NaN	NaN	18.5	17.6667	NaN	NaN	122	1040516	1040517	1040510	1093.87	469.107	1075.76	473.368	9	16	16.3333	104073
4	NaN	NaN	0.333333	NaN	NaN	0.333333	139.667	1040519	1040520	1040517	1033.15	387.616	1021.44	400.931	10	17.6667	16	1040510
4	16.6667	NaN	NaN	18.3333	NaN	NaN	109.5	1040521	1040522	1040112	276.564	675.232	272.303	654.459	8	16.5	18.3333	104093
4	NaN	NaN	0.333333	NaN	NaN	0.333333	126.167	1040523	1040524	1040521	513.581	499.466	500.798	491.477	9	16.6667	16.5	1040112
4	NaN	NaN	0.333333	NaN	NaN	0.333333	127.833	1040525	1040526	1040522	138.082	549.799	127.43	543.94	9	18.3333	16.5	1040112
4	16.1667	NaN	NaN	16	NaN	NaN	116.833	1040527	1040528	1040464	320.772	654.193	298.934	641.41	9	16	14.5	1040461
4	NaN	NaN	0.333333	NaN	NaN	0.333333	133	1040529	1040530	1040527	310.918	1016.64	302.929	1005.46	10	16.1667	16	1040464
4	NaN	NaN	0.333333	NaN	NaN	0.333333	132.833	1040531	1040532	1040528	342.609	410.519	334.087	425.432	10	16	16	1040464
4	NaN	NaN	0.5	NaN	NaN	0.5	140	1040533	1040534	1040356	529.826	565.245	525.565	579.093	10	17	16.1667	1040353
4	17.3333	NaN	NaN	NaN	NaN	17.5	123	1040535	1040536	1040268	476.031	592.942	476.564	577.496	9	15.3333	15.5	1040254
4	NaN	NaN	0.166667	NaN	NaN	0.166667	140.333	1040537	1040538	1040535	542.609	785.751	529.826	783.62	10	17.3333	15.3333	1040268
5	24	NaN	NaN	19	NaN	NaN	14.1667	10502	10503	10501	583.754	501.73	591.211	520.904	2	NaN	NaN	105000
5	24.1667	NaN	NaN	21.8333	NaN	NaN	38.1667	10505	10506	10502	745.671	289.746	728.627	302.529	3	24	NaN	10501
5	16	NaN	NaN	16.1667	NaN	NaN	62.3333	10508	10509	10505	715.844	486.817	710.518	469.773	4	24.1667	24	10502
5	13.6667	NaN	NaN	22.1667	NaN	NaN	78.3333	105011	105012	10508	1037.55	614.646	1016.24	627.429	5	16	24.1667	10505
5	NaN	NaN	8.5	14.8333	NaN	NaN	92	105014	105015	105011	1183.89	703.993	1166.31	705.059	6	13.6667	16	10508
5	NaN	NaN	33.6667	NaN	NaN	33.6667	106.833	105019	105020	105015	1040.61	791.876	1033.15	780.158	7	14.8333	13.6667	105011
5	23	NaN	NaN	17.8333	NaN	NaN	100.5	105023	105024	105012	896.803	453.661	890.411	471.77	6	22.1667	16	10508
5	NaN	7.33333	NaN	NaN	NaN	17	123.5	105026	105027	105023	680.824	508.255	674.965	525.299	7	23	22.1667	105012
5	17.6667	NaN	NaN	18.6667	NaN	NaN	33.1667	105032	105033	10503	405.059	547.269	393.874	568.84	3	19	NaN	10501
5	25.1667	NaN	NaN	19.6667	NaN	NaN	50.8333	105035	105036	105032	453.794	692.675	449.799	680.691	4	17.6667	19	10503
5	21.5	NaN	NaN	24.1667	NaN	NaN	76	105038	105039	105035	448.202	613.581	443.408	627.962	5	25.1667	17.6667	105032
5	20.5	NaN	NaN	22.1667	NaN	NaN	97.5	105041	105042	105038	708.654	661.117	693.874	652.728	6	21.5	25.1667	105035
5	18.5	NaN	NaN	21.3333	NaN	NaN	118	105044	105045	105041	563.248	702.662	563.248	716.244	7	20.5	21.5	105038
5	NaN	NaN	4	NaN	NaN	4	136.5	105047	105048	105044	880.025	425.032	866.044	412.25	8	18.5	20.5	105041
5	16.5	NaN	NaN	15.8333	NaN	NaN	78.5	105052	105053	10509	625.565	371.105	609.586	377.496	5	16.1667	24.1667	10505
5	17.8333	NaN	NaN	NaN	NaN	4.83333	95	105055	105056	105052	1062.18	93.076	1060.58	80.293	6	16.5	16.1667	10509
5	NaN	5.83333	NaN	NaN	5.83333	NaN	112.833	105058	105059	105055	1299.86	104.261	1292.67	96.671	7	17.8333	16.5	105052
5	15.6667	NaN	NaN	18.5	NaN	NaN	100.167	105063	105064	105039	278.961	777.762	269.374	791.61	6	24.1667	25.1667	105035
5	NaN	NaN	0.333333	NaN	NaN	0.333333	115.833	105066	105067	105063	77.097	892.408	68.509	888.214	7	15.6667	24.1667	105039
5	21.8333	NaN	NaN	20.8333	NaN	NaN	70.5	105069	105070	105036	689.879	642.476	676.563	631.29	5	19.6667	17.6667	105032
5	NaN	NaN	48.1667	NaN	NaN	48.1667	92.3333	105072	105073	105069	955.924	577.629	943.94	587.615	6	21.8333	19.6667	105036
5	18.8333	NaN	NaN	23.3333	NaN	NaN	60	105077	105078	10506	605.458	586.018	586.284	584.686	4	21.8333	24	10502
5	19.5	NaN	NaN	19.1667	NaN	NaN	78.8333	1050364	1050365	105077	876.03	558.055	869.239	570.039	5	18.8333	21.8333	10506
5	17.6667	NaN	NaN	16.8333	NaN	NaN	98.3333	1050367	1050368	1050364	897.202	435.419	883.221	424.234	6	19.5	18.8333	105077
5	14.5	NaN	NaN	13.5	NaN	NaN	116	1050370	1050371	1050367	804.126	256.458	786.949	234.886	7	17.6667	19.5	1050364
5	NaN	NaN	10	NaN	NaN	10	130.5	1050373	1050374	1050370	812.915	336.75	812.515	324.766	8	14.5	17.6667	1050367
5	16.1667	NaN	NaN	15.8333	NaN	NaN	98	1050378	1050379	1050365	1027.03	834.219	1016.91	830.491	6	19.1667	18.8333	105077
5	15.6667	NaN	NaN	15.8333	NaN	NaN	114.167	1050381	1050382	1050378	1098.93	854.992	1091.48	865.644	7	16.1667	19.1667	1050365
5	NaN	NaN	10.6667	NaN	NaN	10.6667	129.833	1050384	1050385	1050381	1075.5	806.523	1063.78	820.371	8	15.6667	16.1667	1050378
5	NaN	NaN	10.5	NaN	NaN	10.5	130	1050389	1050390	1050382	1007.85	966.31	1004.13	946.603	8	15.8333	16.1667	1050378
5	16	NaN	NaN	15.8333	NaN	NaN	115.167	1050394	1050395	1050368	1011.85	513.315	1004.39	526.098	7	16.8333	19.5	1050364
5	NaN	NaN	9.33333	NaN	NaN	9.33333	131.167	1050397	1050398	1050394	1042.74	492.809	1033.15	469.906	8	16	16.8333	1050368
5	NaN	NaN	9.5	NaN	NaN	9.5	131	1050402	1050403	1050395	1053.13	692.542	1041.41	691.477	8	15.8333	16.8333	1050368
5	NaN	NaN	11	NaN	NaN	11	129.5	1050407	1050408	1050371	715.178	114.114	700.265	127.962	8	13.5	17.6667	1050367
5	18.8333	NaN	NaN	19	NaN	NaN	113.833	1050412	1050413	1050379	887.748	865.112	882.954	878.96	7	15.8333	19.1667	1050365
5	NaN	NaN	7.83333	NaN	NaN	7.83333	132.667	1050415	1050416	1050412	847.002	784.419	845.937	798.267	8	18.8333	15.8333	1050379
5	NaN	NaN	7.66667	NaN	NaN	7.66667	132.833	1050419	1050420	1050413	775.098	795.072	764.446	807.855	8	19	15.8333	1050379
5	19.8333	NaN	NaN	19.8333	NaN	NaN	51.8333	105094	105095	105033	294.007	649.133	281.624	655.525	4	18.6667	19	10503
5	21.6667	NaN	NaN	23.5	NaN	NaN	71.6667	105097	105098	105094	401.863	561.65	401.064	581.623	5	19.8333	18.6667	105033
5	13.1667	NaN	NaN	14	NaN	NaN	93.3333	1050100	1050101	105097	334.953	381.091	325.765	386.883	6	21.6667	19.8333	105094
5	19.3333	NaN	NaN	17.8333	NaN	NaN	106.5	1050103	1050104	1050100	120.239	335.153	106.924	356.724	7	13.1667	21.6667	105097
5	NaN	NaN	6.5	NaN	NaN	5.16667	125.833	1050106	1050107	1050103	15.579	152.996	14.514	139.68	8	19.3333	13.1667	1050100
5	20	NaN	NaN	NaN	NaN	6.33333	107.333	1050111	1050112	1050101	152.996	387.349	140.479	383.355	7	14	21.6667	105097
5	NaN	NaN	13.1667	NaN	NaN	13.1667	127.333	1050114	1050115	1050111	133.289	360.718	127.164	350.599	8	20	14	1050101
5	16.6667	NaN	NaN	15.3333	NaN	NaN	83.3333	1050120	1050121	105078	617.176	498.135	616.776	483.754	5	23.3333	21.8333	10506
5	17.6667	NaN	NaN	16	NaN	NaN	100	1050123	1050124	1050120	762.182	405.059	752.995	407.056	6	16.6667	23.3333	105078
5	20.8333	NaN	NaN	20.5	NaN	NaN	117.667	1050126	1050127	1050123	1117.31	254.061	1096.14	258.055	7	17.6667	16.6667	1050120
5	NaN	NaN	2	NaN	NaN	2	138.5	1050129	1050130	1050126	1127.3	520.505	1116.11	511.317	8	20.8333	17.6667	1050123
5	NaN	NaN	2.33333	NaN	NaN	2.33333	138.167	1050134	1050135	1050127	1098.93	331.557	1090.94	339.547	8	20.5	17.6667	1050123
5	20.6667	NaN	NaN	19.8333	NaN	NaN	91.3333	1050155	1050156	105070	458.987	666.71	450.199	676.696	6	20.8333	19.6667	105036
5	18.3333	NaN	NaN	17.5	NaN	NaN	112	1050158	1050159	1050155	468.175	667.908	448.601	668.707	7	20.6667	20.8333	105070
5	NaN	NaN	10.1667	NaN	NaN	10.1667	130.333	1050161	1050162	1050158	496.936	742.608	485.751	736.616	8	18.3333	20.6667	1050155
5	NaN	NaN	21.8333	NaN	NaN	21.8333	118.667	1050166	1050167	105064	85.086	864.446	84.287	854.859	7	18.5	24.1667	105039
5	NaN	NaN	16.1667	NaN	NaN	16.1667	124.333	1050171	1050172	1050104	47.936	569.639	33.555	566.044	8	17.8333	13.1667	1050100
5	21.6667	NaN	NaN	18.3333	NaN	NaN	111.167	1050185	1050186	1050156	580.159	732.755	574.3	744.206	7	19.8333	20.8333	105070
5	NaN	NaN	7.66667	NaN	NaN	7.66667	132.833	1050189	1050190	1050185	581.49	521.038	567.376	527.429	8	21.6667	19.8333	1050156
5	NaN	NaN	22.1667	NaN	NaN	22.1667	118.333	1050202	1050203	105024	982.821	577.762	985.484	589.746	7	17.8333	22.1667	105012
5	17.3333	NaN	NaN	17.5	NaN	NaN	119.667	1050221	1050222	105042	873.101	403.861	864.845	393.475	7	22.1667	21.5	105038
5	NaN	NaN	3.5	NaN	NaN	3.5	137	1050225	1050226	1050221	809.985	586.284	799.333	590.012	8	17.3333	22.1667	105042
5	NaN	NaN	11	NaN	NaN	11	129.5	1050232	1050233	1050159	411.051	562.582	396.937	561.783	8	17.5	20.6667	1050155
5	NaN	NaN	24.5	NaN	NaN	24.5	116	1050238	1050239	1050124	685.618	448.601	671.237	444.606	7	16	16.6667	1050120
5	NaN	NaN	11	NaN	NaN	11	129.5	1050253	1050254	1050186	388.947	952.195	371.903	949.266	8	18.3333	19.8333	1050156
5	23.6667	NaN	NaN	22.6667	NaN	NaN	95.1667	1050259	1050260	105098	492.276	561.783	472.569	551.131	6	23.5	19.8333	105094
5	18.8333	NaN	NaN	18.6667	NaN	NaN	118.833	1050263	1050264	1050259	321.304	513.048	310.119	508.521	7	23.6667	23.5	105098
5	NaN	NaN	2.83333	NaN	NaN	2.83333	137.667	1050267	1050268	1050263	196.671	528.761	179.893	531.956	8	18.8333	23.6667	1050259
5	NaN	NaN	12.5	22.5	NaN	NaN	71.6667	1050272	1050273	105095	99.068	399.866	87.084	390.279	5	19.8333	18.6667	105033
5	NaN	NaN	14.6667	23.8333	NaN	NaN	94.1667	1050277	1050278	1050273	114.647	449.4	98.269	457.789	6	22.5	19.8333	105095
5	NaN	NaN	22.5	NaN	NaN	22.5	118	1050282	1050283	1050278	257.656	582.023	247.27	595.605	7	23.8333	22.5	1050273
5	18.3333	NaN	NaN	18.8333	NaN	NaN	94.3333	1050293	1050292	105053	704.659	446.204	714.646	437.016	6	15.8333	16.1667	10509
5	NaN	NaN	27.8333	NaN	7.33333	NaN	112.667	1050296	1050297	1050293	594.406	372.702	594.406	358.322	7	18.3333	15.8333	105053
5	NaN	NaN	27.3333	NaN	NaN	27.3333	113.167	1050305	1050306	1050292	758.987	590.412	741.81	600.798	7	18.8333	15.8333	105053
5	17.5	NaN	NaN	16.3333	NaN	NaN	98.6667	1050311	1050312	1050121	736.217	411.85	726.23	407.056	6	15.3333	23.3333	105078
5	NaN	NaN	24.3333	NaN	NaN	24.3333	116.167	1050315	1050316	1050311	547.269	369.906	547.669	354.327	7	17.5	15.3333	1050121
5	20.5	NaN	NaN	20	NaN	NaN	115	1050321	1050322	1050312	685.485	386.684	688.68	373.501	7	16.3333	15.3333	1050121
5	NaN	NaN	5	NaN	NaN	5	135.5	1050325	1050326	1050321	824.1	618.774	813.314	625.165	8	20.5	16.3333	1050312
5	NaN	NaN	1.16667	NaN	NaN	1.16667	139.333	1050329	1050330	105045	655.125	846.47	648.334	862.049	8	21.3333	20.5	105041
5	NaN	NaN	5.5	NaN	NaN	5.5	135	1050333	1050334	1050322	668.707	218.908	649.932	211.318	8	20	16.3333	1050312
5	NaN	NaN	3	NaN	NaN	3	137.5	1050337	1050338	1050264	414.247	395.472	399.866	400.665	8	18.6667	23.6667	1050259
5	19.8333	NaN	NaN	18	NaN	NaN	117.833	1050341	1050342	1050260	708.787	783.088	699.466	795.604	7	22.6667	23.5	105098
5	NaN	NaN	2.83333	NaN	NaN	2.83333	137.667	1050346	1050345	1050341	799.333	1031.56	799.333	1044.07	8	19.8333	22.6667	1050260
5	NaN	NaN	4.66667	NaN	NaN	4.66667	135.833	1050349	1050350	1050342	751.13	807.322	732.755	803.594	8	18	22.6667	1050260
5	NaN	NaN	3.33333	NaN	NaN	3.33333	137.167	1050353	1050354	1050222	1069.9	325.299	1060.32	338.615	8	17.5	22.1667	105042
6	21.1667	NaN	NaN	22.3333	NaN	NaN	10.6667	10601	10602	10603	1084.29	723.967	1076.3	734.619	2	NaN	NaN	106000
6	NaN	NaN	11.6667	NaN	NaN	1.83333	31.8333	10607	10606	10601	1415.58	758.587	1417.17	771.37	3	21.1667	NaN	10603
6	15.6667	NaN	NaN	20.1667	NaN	NaN	33	106014	106015	10602	1266.31	518.508	1258.72	507.722	3	22.3333	NaN	10603
6	NaN	NaN	3	NaN	NaN	9.83333	48.6667	106018	106019	106014	1326.63	366.71	1326.63	354.726	4	15.6667	22.3333	10602
6	17.6667	NaN	NaN	NaN	NaN	19.6667	53.1667	106024	106025	106015	1309.85	622.768	1310.65	604.792	4	20.1667	22.3333	10602
6	17	NaN	NaN	NaN	NaN	17	70.8333	106028	106029	106024	1237.95	564.846	1240.34	583.221	5	17.6667	20.1667	106015
6	18.5	NaN	NaN	19	NaN	NaN	87.8333	106032	106033	106028	1355.79	663.514	1343.41	651.53	6	17	17.6667	106024
6	19.1667	NaN	NaN	18.5	NaN	NaN	106.333	106036	106037	106032	1348.2	642.742	1339.81	627.163	7	18.5	17	106028
6	NaN	NaN	15	NaN	NaN	15	125.5	106040	106041	106036	1267.51	736.616	1265.11	750.598	8	19.1667	18.5	106032
6	NaN	NaN	15.6667	NaN	NaN	15.6667	124.833	106050	106051	106037	1277.1	588.814	1256.72	582.822	8	18.5	18.5	106032
6	19	NaN	NaN	NaN	NaN	15.8333	106.833	106060	106061	106033	1300.66	801.73	1292.28	787.748	7	19	17	106028
6	NaN	NaN	14.6667	NaN	NaN	14.6667	125.833	106064	106065	106060	1264.31	766.976	1260.72	785.751	8	19	19	106033
7	18.1667	NaN	NaN	19.3333	NaN	NaN	15.5	10701	10702	10703	495.339	1101.46	481.49	1078.03	2	NaN	NaN	107000
7	13.8333	NaN	NaN	18.6667	NaN	NaN	33.6667	10708	10709	10701	690.411	1124.23	666.443	1124.23	3	18.1667	NaN	10703
7	16	NaN	NaN	18.1667	NaN	NaN	47.5	107012	107013	10708	582.822	994.805	575.365	1003.33	4	13.8333	18.1667	10701
7	18.1667	NaN	NaN	14.5	NaN	NaN	63.5	107016	107017	107012	424.1	978.826	401.198	980.957	5	16	13.8333	10708
7	22.8333	NaN	NaN	26.6667	NaN	NaN	81.6667	107020	107021	107016	575.898	1023.57	577.496	1008.65	6	18.1667	16	107012
7	28.1667	NaN	NaN	30	NaN	NaN	104.5	107024	107025	107020	350.066	918.64	345.805	907.988	7	22.8333	18.1667	107016
7	NaN	NaN	7.83333	NaN	NaN	7.83333	132.667	107028	107029	107024	342.077	1047.54	333.022	1038.48	8	28.1667	22.8333	107020
7	NaN	NaN	6	NaN	NaN	6	134.5	107033	107034	107025	276.564	997.734	268.575	1011.05	8	30	22.8333	107020
7	NaN	14.1667	NaN	28	NaN	NaN	108.333	107042	107043	107021	709.32	1031.29	703.993	1040.34	7	26.6667	18.1667	107016
7	NaN	NaN	4.16667	NaN	NaN	4.16667	136.333	107049	107050	107043	846.736	1191.08	830.225	1205.99	8	28	26.6667	107021
7	NaN	26.3333	NaN	15.1667	NaN	NaN	78	107055	107056	107017	432.09	941.809	427.829	954.592	6	14.5	16	107012
7	15.6667	NaN	NaN	21.6667	NaN	NaN	93.1667	107062	107063	107056	517.309	1156.99	502.396	1164.44	7	15.1667	14.5	107017
7	25.3333	NaN	NaN	21.3333	NaN	NaN	108.833	107066	107067	107062	585.219	1096.54	575.099	1083.22	8	15.6667	15.1667	107056
7	NaN	NaN	6.33333	NaN	NaN	6.33333	134.167	107070	107071	107066	621.97	1247.27	609.719	1240.34	9	25.3333	15.6667	107062
7	NaN	NaN	10.3333	NaN	NaN	10.3333	130.167	107076	107077	107067	683.754	1128.49	672.569	1113.58	9	21.3333	15.6667	107062
7	19	NaN	NaN	20.5	NaN	NaN	114.833	107086	107087	107063	351.397	1229.69	350.865	1214.24	8	21.6667	15.1667	107056
7	NaN	NaN	6.66667	NaN	NaN	6.66667	133.833	107090	107091	107086	406.79	1197.73	396.138	1186.02	9	19	21.6667	107063
7	NaN	NaN	5.16667	NaN	NaN	5.16667	135.333	107098	107099	107087	409.986	1222.23	406.79	1203.06	9	20.5	21.6667	107063
7	18.6667	NaN	NaN	16.5	NaN	NaN	65.6667	1070104	1070105	107013	739.679	1098.13	723.7	1105.06	5	18.1667	13.8333	10708
7	24	NaN	NaN	26	NaN	NaN	84.3333	1070108	1070109	1070104	758.321	973.5	757.256	956.456	6	18.6667	18.1667	107013
7	21.1667	NaN	NaN	20.1667	NaN	NaN	108.333	1070112	1070113	1070108	803.594	1061.91	797.202	1048.6	7	24	18.6667	1070104
7	NaN	NaN	11	NaN	NaN	11	129.5	1070116	1070117	1070112	825.964	1115.18	806.257	1111.45	8	21.1667	24	1070108
7	NaN	NaN	12	NaN	NaN	12	128.5	1070123	1070124	1070113	803.061	1037.41	800.931	1027.83	8	20.1667	24	1070108
7	16.8333	NaN	NaN	17	NaN	NaN	110.333	1070129	1070130	1070109	737.016	954.326	729.559	971.37	7	26	18.6667	1070104
7	NaN	NaN	13.3333	NaN	NaN	13.3333	127.167	1070133	1070134	1070129	669.906	889.346	655.525	883.487	8	16.8333	26	1070109
7	NaN	NaN	13.1667	NaN	NaN	13.1667	127.333	1070139	1070140	1070130	675.232	934.086	665.112	935.151	8	17	26	1070109
7	19.3333	NaN	NaN	19.1667	NaN	NaN	82.1667	1070145	1070146	1070105	835.018	884.552	816.909	878.693	6	16.5	18.1667	107013
7	23.1667	NaN	NaN	21.6667	NaN	NaN	101.5	1070149	1070150	1070145	849.666	828.094	833.687	835.551	7	19.3333	16.5	1070105
7	14.8333	NaN	NaN	NaN	NaN	15.8333	124.667	1070153	1070154	1070149	1034.48	715.178	1020.11	730.092	8	23.1667	19.3333	1070145
7	NaN	NaN	1	NaN	NaN	1	139.5	1070157	1070158	1070153	934.352	692.808	920.504	674.699	9	14.8333	23.1667	1070149
7	NaN	NaN	17.3333	NaN	NaN	17.3333	123.167	1070166	1070167	1070150	819.306	862.182	803.86	868.041	8	21.6667	19.3333	1070145
7	17.8333	NaN	NaN	18.3333	NaN	NaN	101.333	1070176	1070177	1070146	670.172	766.843	664.846	756.723	7	19.1667	16.5	1070105
7	NaN	6.16667	NaN	NaN	NaN	5.83333	119.167	1070180	1070181	1070176	778.028	917.575	775.897	907.455	8	17.8333	19.1667	1070146
7	NaN	NaN	20.8333	NaN	NaN	20.8333	119.667	1070185	1070186	1070177	629.959	778.028	613.448	768.441	8	18.3333	19.1667	1070146
7	19.5	NaN	NaN	16.8333	NaN	NaN	52.3333	1070195	1070196	10709	555.924	1163.65	554.859	1148.73	4	18.6667	18.1667	10701
7	NaN	11.1667	NaN	NaN	NaN	11	69.1667	1070203	1070204	1070196	473.368	1047	461.65	1042.21	5	16.8333	18.6667	10709
7	31.3333	NaN	NaN	29	NaN	NaN	71.8333	1070200	1070199	1070195	755.125	1143.94	769.506	1133.82	5	19.5	18.6667	10709
7	NaN	NaN	37.3333	NaN	NaN	37.3333	103.167	1070210	1070211	1070200	807.322	1073.1	801.996	1092.28	6	31.3333	19.5	1070195
7	28.6667	NaN	NaN	32.8333	NaN	NaN	100.833	1070218	1070219	1070199	926.629	1151.4	913.846	1148.73	6	29	19.5	1070195
7	NaN	NaN	11	NaN	NaN	11	129.5	1070222	1070223	1070218	1037.95	1346.34	1016.11	1359.12	7	28.6667	29	1070199
7	NaN	NaN	6.83333	NaN	NaN	6.83333	133.667	1070228	1070229	1070219	784.686	1325.03	780.957	1340.48	7	32.8333	29	1070199
7	18.8333	NaN	NaN	18.1667	NaN	NaN	34.8333	1070234	1070235	10702	670.971	1130.09	662.981	1143.94	3	19.3333	NaN	10703
7	NaN	NaN	19.1667	18.6667	NaN	NaN	53.6667	1070238	1070239	1070234	530.891	1111.45	524.5	1132.75	4	18.8333	19.3333	10702
7	18	NaN	NaN	20.6667	NaN	NaN	72.3333	1070245	1070246	1070239	426.63	933.953	411.451	929.958	5	18.6667	18.8333	1070234
7	18.5	NaN	NaN	17.3333	NaN	NaN	90.3333	1070253	1070254	1070245	451.797	740.611	451.797	754.992	6	18	18.6667	1070239
7	NaN	NaN	32.8333	21.8333	NaN	NaN	107.667	1070261	1070262	1070254	389.08	745.405	382.689	733.021	7	17.3333	18	1070245
7	NaN	NaN	11	NaN	NaN	11	129.5	1070269	1070270	1070262	484.154	625.165	472.968	612.382	8	21.8333	17.3333	1070254
7	NaN	NaN	31.6667	NaN	NaN	31.6667	108.833	1070259	1070260	1070253	466.976	916.776	459.786	907.189	7	18.5	18	1070245
7	18.1667	NaN	NaN	NaN	33.5	NaN	93	1070251	1070252	1070246	614.779	1004.26	608.787	986.283	6	20.6667	18.6667	1070239
7	24	NaN	NaN	NaN	NaN	29.3333	111.167	1070279	1070280	1070251	479.759	844.073	468.974	826.896	7	18.1667	20.6667	1070246
7	NaN	NaN	5.33333	NaN	NaN	5.33333	135.167	1070283	1070284	1070279	701.463	711.85	685.884	701.863	8	24	18.1667	1070251
7	20.8333	NaN	NaN	20.6667	NaN	NaN	53	1070297	1070298	1070235	718.108	1271.77	709.586	1287.75	4	18.1667	19.3333	10702
7	19.1667	NaN	NaN	21.1667	NaN	NaN	73.6667	1070303	1070304	1070298	673.101	1217.44	666.71	1232.89	5	20.6667	18.1667	1070235
7	25.3333	NaN	NaN	19.3333	NaN	NaN	94.8333	1070311	1070312	1070304	998.001	1165.24	984.685	1176.43	6	21.1667	20.6667	1070298
7	NaN	NaN	20.3333	NaN	NaN	20.3333	120.167	1070316	1070317	1070311	1154.59	1155.12	1149.8	1141.81	7	25.3333	21.1667	1070304
7	27	NaN	NaN	23.3333	NaN	NaN	92.8333	1070320	1070321	1070303	677.362	1126.89	669.906	1141.28	6	19.1667	20.6667	1070298
7	NaN	NaN	20.6667	NaN	NaN	20.6667	119.833	1070324	1070325	1070320	746.071	977.761	745.538	956.456	7	27	19.1667	1070303
7	NaN	13.5	NaN	NaN	NaN	13.3333	116.167	1070334	1070335	1070321	849.399	1321.3	836.084	1310.12	7	23.3333	19.1667	1070303
7	NaN	NaN	14.5	NaN	NaN	14.3333	114.167	1070341	1070342	1070312	943.141	1320.24	931.956	1338.35	7	19.3333	21.1667	1070304
7	23	NaN	NaN	23	NaN	NaN	73.8333	1070305	1070306	1070297	813.181	1195.07	816.377	1172.7	5	20.8333	18.1667	1070235
7	NaN	NaN	43.6667	19.1667	NaN	NaN	96.8333	1070347	1070348	1070305	694.939	1261.65	693.874	1241.41	6	23	20.8333	1070297
7	18.8333	NaN	NaN	21.8333	NaN	NaN	116	1070352	1070353	1070348	713.048	1080.03	696.004	1080.03	7	19.1667	23	1070305
7	NaN	NaN	5.66667	NaN	NaN	5.66667	134.833	1070356	1070357	1070352	896.536	1011.85	880.558	995.338	8	18.8333	19.1667	1070348
7	NaN	NaN	2.66667	NaN	NaN	2.66667	137.833	1070361	1070362	1070353	676.031	956.989	664.846	949	8	21.8333	19.1667	1070348
7	NaN	NaN	17.6667	NaN	NaN	17.6667	96.8333	1070368	1070367	1070306	890.145	1173.23	903.46	1171.64	6	23	20.8333	1070297
8	NaN	NaN	3.5	18.5	NaN	NaN	7.16667	10801	10802	10803	116.112	667.908	117.177	650.864	2	NaN	NaN	108000
8	NaN	NaN	0.333333	NaN	NaN	0.333333	25.6667	10807	10808	10802	29.827	674.3	25.566	694.539	3	18.5	NaN	10803
9	NaN	NaN	5.33333	21.8333	NaN	NaN	8.83333	10902	10903	10901	127.829	465.512	104.394	466.577	2	NaN	NaN	109000
9	25.5	NaN	NaN	31	NaN	NaN	30.6667	10907	10908	10903	363.248	545.405	355.792	565.645	3	21.8333	NaN	10901
9	NaN	NaN	84.3333	NaN	NaN	84.3333	56.1667	109011	109012	10907	378.162	445.272	377.097	435.685	4	25.5	21.8333	10903
9	48.3333	NaN	NaN	NaN	NaN	78.8333	61.6667	109019	109020	10908	354.327	256.324	340.479	248.868	4	31	21.8333	10903
9	NaN	23.6667	NaN	NaN	NaN	30.5	110	109023	109024	109019	482.156	414.513	478.96	395.871	5	48.3333	31	10908
10	29.8333	NaN	NaN	20.6667	NaN	NaN	15.6667	101002	101003	101001	731.823	662.582	717.975	673.234	2	NaN	NaN	1010000
10	17.8333	NaN	NaN	18.1667	NaN	NaN	45.5	101006	101007	101002	333.954	652.728	322.769	653.128	3	29.8333	NaN	101001
10	14.5	NaN	NaN	14.1667	NaN	NaN	63.3333	1010010	1010011	101006	206.791	583.088	186.018	599.599	4	17.8333	29.8333	101002
10	21.1667	NaN	NaN	16.8333	NaN	NaN	63.6667	1010014	1010015	101007	387.349	904.792	379.893	895.737	4	18.1667	29.8333	101002
10	19	NaN	NaN	17.5	NaN	NaN	84.8333	1010018	1010019	1010014	590.811	1148.47	576.963	1135.15	5	21.1667	18.1667	101007
10	17.6667	NaN	NaN	16.3333	NaN	NaN	103.833	1010022	1010023	1010018	694.672	1259.52	673.368	1252.59	6	19	21.1667	1010014
10	17.8333	NaN	NaN	17.3333	NaN	NaN	121.5	1010026	1010027	1010022	721.304	1230.22	708.521	1228.63	7	17.6667	19	1010018
10	NaN	NaN	1.16667	NaN	NaN	1.16667	139.333	1010030	1010031	1010026	807.322	1231.29	794.007	1237.68	8	17.8333	17.6667	1010022
10	13.5	NaN	NaN	13.8333	NaN	NaN	77.8333	1010061	1010062	1010010	219.041	729.027	203.595	723.168	5	14.5	17.8333	101006
10	17.1667	NaN	NaN	18.6667	NaN	NaN	91.3333	1010065	1010066	1010061	184.42	673.634	172.17	689.08	6	13.5	14.5	1010010
10	16	NaN	NaN	14.5	NaN	NaN	108.5	1010069	1010070	1010065	233.954	668.308	223.302	677.362	7	17.1667	13.5	1010061
10	NaN	NaN	16	NaN	NaN	16	124.5	1010073	1010074	1010069	153.528	662.981	145.539	672.569	8	16	17.1667	1010065
10	16.6667	NaN	NaN	NaN	NaN	9.83333	123	1010080	1010081	1010070	88.016	633.421	84.82	613.181	8	14.5	17.1667	1010065
10	NaN	NaN	0.833333	NaN	NaN	0.833333	139.667	1010084	1010085	1010080	159.92	643.541	153.528	652.063	9	16.6667	14.5	1010070
10	15.3333	NaN	NaN	19.6667	NaN	NaN	110	1010091	1010092	1010066	191.345	647.269	182.29	652.063	7	18.6667	13.5	1010061
10	NaN	NaN	15.1667	NaN	NaN	10.5	125.333	1010095	1010096	1010091	183.355	715.445	184.953	698.933	8	15.3333	18.6667	1010066
10	14.1667	NaN	NaN	13.8333	NaN	NaN	77.5	10100102	10100103	1010011	228.095	451.797	208.388	454.992	5	14.1667	17.8333	101006
10	14.8333	NaN	NaN	16.5	NaN	NaN	91.6667	10100106	10100107	10100102	308.521	240.878	308.521	223.834	6	14.1667	14.1667	1010011
10	17.3333	NaN	NaN	20.6667	NaN	NaN	106.5	10100110	10100111	10100106	262.183	152.996	255.792	134.887	7	14.8333	14.1667	10100102
10	NaN	NaN	16.6667	NaN	NaN	16.6667	123.833	10100114	10100115	10100110	358.055	98.668	342.609	108.255	8	17.3333	14.8333	10100106
10	NaN	NaN	1.33333	15.5	NaN	NaN	91.6667	10100121	10100122	1010062	35.286	836.084	31.558	852.595	6	13.8333	14.5	1010010
10	18.5	NaN	NaN	16.8333	NaN	NaN	107.167	10100126	10100127	10100122	238.748	974.033	212.117	971.37	7	15.5	13.8333	1010062
10	NaN	NaN	14.8333	NaN	NaN	14.8333	125.667	10100130	10100131	10100126	149.401	924.366	133.022	940.744	8	18.5	15.5	10100122
10	15.3333	NaN	NaN	15.3333	NaN	NaN	80.5	10100158	10100159	1010015	301.997	810.518	292.809	794.539	5	16.8333	18.1667	101007
10	16.5	NaN	NaN	18	NaN	NaN	95.8333	10100162	10100163	10100158	248.868	755.391	241.278	748.201	6	15.3333	16.8333	1010015
10	16.1667	NaN	NaN	18.3333	NaN	NaN	112.333	10100166	10100167	10100162	289.613	746.204	279.227	748.201	7	16.5	15.3333	10100158
10	NaN	NaN	12	NaN	NaN	12	128.5	10100170	10100171	10100166	357.922	733.021	332.356	740.611	8	16.1667	16.5	10100162
10	16.8333	NaN	NaN	15.1667	NaN	NaN	102.333	10100176	10100177	1010019	734.619	1113.71	719.839	1118.91	6	17.5	21.1667	1010014
10	16.5	NaN	NaN	17.8333	NaN	NaN	119.167	10100180	10100181	10100176	794.539	1025.83	786.15	1011.85	7	16.8333	17.5	1010019
10	NaN	NaN	4.83333	NaN	NaN	4.83333	135.667	10100184	10100185	10100180	854.859	1102.53	846.07	1090.94	8	16.5	16.8333	10100176
10	17.6667	NaN	NaN	16.6667	NaN	NaN	120.167	10100190	10100191	1010023	694.672	1146.07	677.895	1147.27	7	16.3333	19	1010018
10	NaN	NaN	2.66667	NaN	NaN	2.66667	137.833	10100194	10100195	10100190	913.98	1143.27	904.392	1155.66	8	17.6667	16.3333	1010023
10	NaN	NaN	1.66667	NaN	NaN	1.66667	138.833	10100200	10100201	1010027	813.314	1342.61	800.531	1345	8	17.3333	17.6667	1010022
10	NaN	NaN	10.8333	NaN	NaN	10.8333	129.667	10100240	10100241	1010092	150.199	467.376	136.218	472.17	8	19.6667	18.6667	1010066
10	15.1667	NaN	NaN	15.6667	NaN	NaN	91.3333	10100248	10100249	10100103	347.935	512.915	341.145	528.494	6	13.8333	14.1667	1010011
10	15.6667	NaN	NaN	17.1667	NaN	NaN	106.5	10100252	10100253	10100248	208.921	469.373	200.932	480.159	7	15.1667	13.8333	10100103
10	17.1667	NaN	NaN	17.6667	NaN	NaN	122.167	10100260	10100261	10100252	183.755	518.508	163.781	501.73	8	15.6667	15.1667	10100248
10	NaN	NaN	1.16667	NaN	NaN	1.16667	139.333	10100264	10100265	10100260	272.037	621.97	270.039	634.353	9	17.1667	15.6667	10100252
10	14.3333	NaN	NaN	14.1667	NaN	NaN	108.167	10100270	10100271	10100107	389.879	326.364	364.713	329.161	7	16.5	14.1667	10100102
10	NaN	NaN	18	NaN	NaN	18	122.5	10100274	10100275	10100270	619.173	157.789	615.978	176.165	8	14.3333	16.5	10100107
10	NaN	NaN	13.3333	NaN	NaN	13.3333	127.167	10100281	10100282	10100111	188.948	199.334	178.562	204.926	8	20.6667	14.8333	10100106
10	NaN	NaN	11.8333	NaN	NaN	16.5	124	10100289	10100290	10100127	141.411	851.263	126.231	848.068	8	16.8333	15.5	10100122
10	17.3333	NaN	NaN	NaN	NaN	13.3333	95.8333	10100318	10100319	10100159	207.323	1020.24	193.342	1017.84	6	15.3333	16.8333	1010015
10	NaN	NaN	17.6667	NaN	NaN	23.6667	113.167	10100322	10100323	10100318	182.157	1091.74	171.771	1076.16	7	17.3333	15.3333	10100159
10	17.6667	NaN	NaN	14.1667	NaN	NaN	113.833	10100331	10100332	10100163	161.784	840.877	158.189	827.695	7	18	15.3333	10100158
10	NaN	NaN	9	NaN	NaN	9	131.5	10100335	10100336	10100331	147.403	828.094	142.21	818.108	8	17.6667	18	10100163
10	NaN	NaN	9.83333	NaN	NaN	9.83333	130.667	10100340	10100341	10100167	387.083	661.517	371.105	649.133	8	18.3333	16.5	10100162
10	15.1667	NaN	NaN	14.1667	NaN	NaN	117.5	10100345	10100346	10100177	659.12	1010.65	645.538	1007.46	7	15.1667	17.5	1010019
10	NaN	NaN	7.83333	NaN	NaN	7.83333	132.667	10100349	10100350	10100345	796.137	896.004	782.555	889.612	8	15.1667	15.1667	10100177
10	NaN	NaN	3.5	NaN	NaN	3.5	137	10100354	10100355	10100181	696.67	1080.56	691.876	1104.13	8	17.8333	16.8333	10100176
10	NaN	NaN	3.66667	NaN	NaN	3.66667	136.833	10100360	10100361	10100191	623.567	1052.99	613.581	1043.01	8	16.6667	16.3333	1010023
10	15	NaN	NaN	18.3333	NaN	NaN	107	10100407	10100406	10100249	155.659	517.309	170.04	516.777	7	15.6667	13.8333	10100103
10	NaN	NaN	15.1667	NaN	NaN	15.1667	125.333	10100412	10100413	10100406	176.964	400.132	167.909	385.752	8	18.3333	15.6667	10100249
10	NaN	NaN	18.5	NaN	NaN	18.5	122	10100415	10100416	10100407	217.976	367.11	213.715	380.425	8	15	15.6667	10100249
10	NaN	NaN	0.666667	NaN	NaN	0.666667	139.833	10100422	10100423	10100261	115.845	547.269	113.449	562.05	9	17.6667	15.6667	10100252
10	NaN	NaN	16.8333	NaN	NaN	16.8333	123.667	10100258	10100259	10100253	276.031	552.862	262.45	539.679	8	17.1667	15.1667	10100248
10	NaN	NaN	18.1667	NaN	NaN	18.1667	122.333	10100434	10100435	10100271	429.427	275.632	408.654	288.814	8	14.1667	16.5	10100107
10	NaN	NaN	12.5	NaN	NaN	12.5	128	10100455	10100456	10100332	231.691	679.892	220.905	673.501	8	14.1667	18	10100163
10	NaN	NaN	8.83333	NaN	NaN	8.83333	131.667	10100467	10100468	10100346	810.118	1112.91	793.74	1101.73	8	14.1667	15.1667	10100177
10	32.3333	NaN	NaN	27.6667	NaN	NaN	36.3333	1010036	1010037	101003	775.098	855.791	768.174	845.138	3	20.6667	NaN	101001
10	16.8333	NaN	NaN	16.6667	NaN	NaN	68.6667	10100520	10100521	1010036	842.475	582.289	835.018	566.843	4	32.3333	20.6667	101003
10	14.8333	NaN	NaN	17	NaN	NaN	85.5	10100523	10100524	10100520	935.684	641.41	917.575	643.008	5	16.8333	32.3333	1010036
10	20.3333	NaN	NaN	15.8333	NaN	NaN	100.333	10100526	10100527	10100523	1008.65	580.159	1007.05	590.811	6	14.8333	16.8333	10100520
10	19	NaN	NaN	NaN	NaN	19.8333	120.667	10100529	10100530	10100526	1218.51	702.662	1208.92	719.173	7	20.3333	14.8333	10100523
10	NaN	NaN	0.833333	NaN	NaN	0.833333	139.667	10100532	10100533	10100529	1236.08	726.097	1219.57	725.565	8	19	20.3333	10100526
10	17.3333	NaN	NaN	14.3333	NaN	NaN	85.3333	10100537	10100538	10100521	822.768	668.041	813.714	669.639	5	16.6667	32.3333	1010036
10	NaN	NaN	37.8333	NaN	NaN	37.8333	102.667	10100540	10100541	10100537	1062.45	712.249	1042.74	710.651	6	17.3333	16.6667	10100521
10	15.5	NaN	NaN	16.3333	NaN	NaN	102.5	10100544	10100545	10100524	661.916	726.63	650.731	731.423	6	17	16.8333	10100520
10	18.6667	NaN	NaN	NaN	NaN	22.5	118	10100547	10100548	10100544	809.453	607.322	800.931	621.171	7	15.5	17	10100524
10	NaN	NaN	3.83333	NaN	NaN	3.83333	136.667	10100550	10100551	10100547	907.988	601.464	888.813	607.855	8	18.6667	15.5	10100544
10	19.8333	NaN	NaN	20.5	NaN	NaN	118.833	10100560	10100561	10100545	705.059	887.748	701.33	876.03	7	16.3333	17	10100524
10	NaN	NaN	1.83333	NaN	NaN	1.83333	138.667	10100563	10100564	10100560	806.523	1180.42	789.479	1174.03	8	19.8333	16.3333	10100545
10	16.8333	NaN	NaN	16.8333	NaN	NaN	99.6667	10100571	10100572	10100538	781.224	540.745	780.691	564.18	6	14.3333	16.6667	10100521
10	15.8333	NaN	NaN	15.8333	NaN	NaN	116.5	10100574	10100575	10100571	721.037	653.128	709.32	653.661	7	16.8333	14.3333	10100538
10	NaN	NaN	8.16667	NaN	NaN	8.16667	132.333	10100578	10100579	10100574	373.501	453.927	358.055	447.003	8	15.8333	16.8333	10100571
10	17	NaN	NaN	16.6667	NaN	NaN	116.167	10100554	10100555	10100527	1118.91	678.694	1114.11	663.248	7	15.8333	14.8333	10100523
10	NaN	NaN	7.33333	NaN	NaN	7.33333	133.167	10100582	10100583	10100554	952.462	630.758	954.592	649.4	8	17	15.8333	10100527
10	NaN	NaN	7.66667	NaN	NaN	7.66667	132.833	10100586	10100587	10100555	1238.48	709.053	1228.36	717.043	8	16.6667	15.8333	10100527
10	NaN	NaN	1.16667	NaN	NaN	1.16667	139.333	10100591	10100592	10100561	886.949	653.394	872.036	661.384	8	20.5	16.3333	10100545
10	17.3333	NaN	NaN	18.5	NaN	NaN	116.5	10100596	10100597	10100572	967.641	242.21	966.043	227.297	7	16.8333	14.3333	10100538
10	NaN	NaN	6.66667	NaN	NaN	6.66667	133.833	10100599	10100600	10100596	1070.44	575.365	1068.84	558.321	8	17.3333	16.8333	10100572
10	NaN	NaN	4.5	NaN	NaN	5.5	135	10100603	10100604	10100597	1358.05	497.869	1349	494.673	8	18.5	16.8333	10100572
10	NaN	NaN	8.16667	NaN	NaN	8.16667	132.333	10100607	10100608	10100575	692.808	598.8	690.145	587.083	8	15.8333	16.8333	10100571
10	18.5	NaN	NaN	19.8333	NaN	NaN	64	10100615	10100616	1010037	480.558	864.845	478.428	846.203	4	27.6667	20.6667	101003
10	15.1667	NaN	NaN	15.5	NaN	NaN	82.5	10100618	10100619	10100615	720.238	737.549	704.792	741.81	5	18.5	27.6667	1010037
10	15.8333	NaN	NaN	14.6667	NaN	NaN	97.6667	10100621	10100622	10100618	941.543	739.413	928.76	747.935	6	15.1667	18.5	10100615
10	18.8333	NaN	NaN	17.8333	NaN	NaN	113.5	10100624	10100625	10100621	759.919	864.579	758.321	846.47	7	15.8333	15.1667	10100618
10	NaN	NaN	8.16667	NaN	NaN	8.16667	132.333	10100627	10100628	10100624	571.37	913.58	551.663	911.45	8	18.8333	15.8333	10100621
10	NaN	NaN	9.16667	NaN	NaN	9.16667	131.333	10100632	10100633	10100625	705.059	653.661	709.32	668.574	8	17.8333	15.8333	10100621
10	18	NaN	NaN	17	NaN	NaN	112.333	10100637	10100638	10100622	591.077	696.803	572.436	696.803	7	14.6667	15.1667	10100618
10	NaN	NaN	10.1667	NaN	NaN	10.1667	130.333	10100640	10100641	10100637	691.21	703.194	680.025	688.814	8	18	14.6667	10100622
10	15.6667	NaN	NaN	28.6667	NaN	NaN	83.8333	10100644	10100645	10100616	580.691	614.247	573.235	637.682	5	19.8333	27.6667	1010037
10	14.8333	NaN	NaN	14.8333	NaN	NaN	99.5	10100647	10100648	10100644	747.935	803.327	739.945	796.403	6	15.6667	19.8333	10100616
10	NaN	NaN	26.1667	NaN	NaN	26.1667	114.333	10100650	10100651	10100647	886.416	668.041	874.166	669.107	7	14.8333	15.6667	10100644
10	16.8333	NaN	NaN	17.6667	NaN	NaN	114.333	10100656	10100657	10100648	703.461	1036.88	698.667	1020.9	7	14.8333	15.6667	10100644
10	NaN	NaN	9.33333	NaN	NaN	9.33333	131.167	10100659	10100660	10100656	833.953	1048.6	822.768	1064.58	8	16.8333	14.8333	10100648
10	NaN	NaN	28	19.6667	NaN	NaN	112.5	10100664	10100663	10100645	742.875	767.908	752.462	781.756	6	28.6667	19.8333	10100616
10	NaN	NaN	11.1667	NaN	NaN	11.1667	129.333	10100667	10100668	10100638	508.521	676.83	498.401	688.547	8	17	14.6667	10100622
10	NaN	NaN	2.83333	NaN	NaN	2.83333	132.167	10100671	10100672	10100663	593.741	852.062	584.153	860.052	7	19.6667	28.6667	10100645
10	NaN	NaN	8.5	NaN	NaN	3	132	10100675	10100674	10100657	601.73	947.135	603.86	962.581	8	17.6667	14.8333	10100648
10	22.3333	NaN	NaN	19.5	NaN	NaN	98	10100678	10100679	10100619	379.094	762.582	368.974	751.929	6	15.5	18.5	10100615
10	NaN	NaN	20.1667	NaN	NaN	20.1667	120.333	10100681	10100682	10100678	188.415	654.193	180.958	671.237	7	22.3333	15.5	10100619
10	16.6667	NaN	NaN	17.8333	NaN	NaN	117.5	10100686	10100687	10100679	407.056	825.165	397.469	816.11	7	19.5	15.5	10100619
10	NaN	NaN	6.33333	NaN	NaN	6.33333	134.167	10100689	10100690	10100686	263.249	931.956	245.672	933.554	8	16.6667	19.5	10100679
10	NaN	NaN	5.16667	NaN	NaN	5.16667	135.333	10100694	10100695	10100687	334.087	765.245	323.435	773.234	8	17.8333	19.5	10100679
11	22.3333	NaN	NaN	19.5	NaN	NaN	15.1667	101103	101104	101101	642.342	415.445	634.886	433.554	2	NaN	NaN	1011000
11	21.5	NaN	NaN	20.1667	NaN	NaN	37.5	101106	101107	101103	532.888	735.818	512.116	720.638	3	22.3333	NaN	101101
11	22.1667	NaN	NaN	19.1667	NaN	NaN	59	101109	1011010	101106	536.883	951.53	532.09	971.503	4	21.5	22.3333	101103
11	NaN	31.1667	NaN	20.3333	NaN	NaN	81.1667	1011012	1011013	101109	414.247	875.631	416.644	889.213	5	22.1667	21.5	101106
11	18.6667	NaN	NaN	20.1667	NaN	NaN	34.6667	1011017	1011018	101104	705.591	787.349	679.493	777.229	3	19.5	NaN	101101
11	23.1667	NaN	NaN	24.5	NaN	NaN	53.3333	1011022	1011021	1011017	745.272	779.626	753.261	767.908	4	18.6667	19.5	101104
11	18.5	NaN	NaN	18.3333	NaN	NaN	76.5	1011023	1011024	1011022	865.378	957.255	848.867	949.266	5	23.1667	18.6667	1011017
11	19.3333	NaN	NaN	NaN	26.3333	NaN	95	1011025	1011026	1011023	1059.52	934.086	1052.6	943.673	6	18.5	23.1667	1011022
11	20.3333	NaN	NaN	20.3333	NaN	NaN	114.333	1011027	1011028	1011025	1133.02	1051.26	1115.98	1041.68	7	19.3333	18.5	1011023
11	NaN	NaN	5.83333	NaN	NaN	5.83333	134.667	1011031	1011032	1011027	1285.62	939.945	1284.02	956.456	8	20.3333	19.3333	1011025
11	18.8333	NaN	NaN	NaN	28	NaN	54.8333	1011033	1011034	1011018	778.56	787.748	757.788	780.558	4	20.1667	19.5	101104
11	18.5	NaN	NaN	NaN	31.6667	NaN	73.6667	1011036	1011037	1011033	863.247	681.091	863.247	695.072	5	18.8333	20.1667	1011018
11	18.5	NaN	NaN	17	NaN	NaN	92.1667	1011039	1011040	1011036	1092.54	556.457	1090.54	573.634	6	18.5	18.8333	1011033
11	18.8333	NaN	NaN	20.1667	NaN	NaN	110.667	1011042	1011043	1011039	1041.81	520.904	1025.03	529.293	7	18.5	18.5	1011036
11	NaN	NaN	11	NaN	NaN	11	129.5	1011045	1011046	1011042	1191.61	367.11	1175.23	373.102	8	18.8333	18.5	1011039
11	NaN	27.5	NaN	17.5	NaN	NaN	94.8333	1011048	1011049	1011024	799.333	997.468	796.536	1017.04	6	18.3333	23.1667	1011022
11	NaN	NaN	5.83333	NaN	NaN	5.83333	134.667	1011029	1011030	1011028	1224.37	1094.14	1213.98	1113.31	8	20.3333	19.3333	1011025
11	20.3333	NaN	NaN	19.1667	NaN	NaN	77.8333	1011052	1011053	1011021	955.924	1091.74	951.13	1112.52	5	24.5	18.6667	1011017
11	18.8333	NaN	NaN	17.6667	NaN	NaN	98.1667	1011056	1011057	1011052	892.408	1124.9	876.829	1112.12	6	20.3333	24.5	1011021
11	16.5	NaN	NaN	15.6667	NaN	NaN	117	1011059	1011060	1011056	857.655	1162.45	855.658	1142.08	7	18.8333	20.3333	1011052
11	NaN	NaN	7	NaN	NaN	7	133.5	1011062	1011063	1011059	960.318	1054.19	948.733	1059.39	8	16.5	18.8333	1011056
11	19.1667	NaN	NaN	18.3333	NaN	NaN	109.167	1011070	1011071	1011040	964.712	576.83	960.717	567.642	7	17	18.5	1011036
11	NaN	NaN	12.1667	NaN	NaN	12.1667	128.333	1011076	1011077	1011070	1203.99	629.959	1201.6	648.734	8	19.1667	17	1011040
11	NaN	NaN	9.66667	NaN	NaN	9.66667	130.833	1011081	1011082	1011043	872.835	672.302	858.054	659.12	8	20.1667	18.5	1011039
11	18.6667	NaN	NaN	22.1667	NaN	NaN	97	1011083	1011084	1011053	1098.13	1037.02	1082.95	1060.98	6	19.1667	24.5	1011021
11	15.5	NaN	NaN	14.1667	NaN	NaN	115.667	1011086	1011087	1011083	1134.88	1098.93	1121.7	1116.11	7	18.6667	19.1667	1011053
11	NaN	NaN	8.5	NaN	NaN	9.33333	131.167	1011090	1011091	1011086	1079.76	1233.95	1068.97	1220.37	8	15.5	18.6667	1011083
11	NaN	NaN	7.83333	NaN	NaN	7.83333	132.667	1011092	1011093	1011060	881.623	1263.91	867.642	1275.1	8	15.6667	18.8333	1011056
11	18.3333	NaN	NaN	19.6667	NaN	NaN	112.333	1011094	1011095	1011049	887.615	871.636	870.438	871.636	7	17.5	18.3333	1011024
11	NaN	NaN	9.83333	NaN	NaN	9.83333	130.667	1011096	1011097	1011094	965.111	690.678	948.334	687.482	8	18.3333	17.5	1011049
11	16.5	NaN	NaN	14.6667	NaN	NaN	119.167	1011099	10110100	1011084	966.709	1047.8	957.122	1063.78	7	22.1667	19.1667	1011053
11	NaN	NaN	6.66667	NaN	NaN	6.66667	133.833	10110107	10110108	10110100	1079.76	1176.43	1067.38	1182.02	8	14.6667	22.1667	1011084
11	NaN	NaN	4.83333	NaN	NaN	4.83333	135.667	10110105	10110106	1011099	933.554	1133.29	915.578	1121.3	8	16.5	22.1667	1011084
11	NaN	NaN	13	NaN	NaN	13	127.5	10110113	10110114	1011071	953.926	329.56	949.932	343.541	8	18.3333	17	1011040
11	NaN	NaN	10.6667	NaN	NaN	10.6667	129.833	10110116	10110117	1011087	1383.75	1266.31	1369.77	1269.11	8	14.1667	18.6667	1011083
11	17	NaN	NaN	16	NaN	NaN	115.833	10110123	10110124	1011057	796.936	1137.28	793.74	1120.5	7	17.6667	20.3333	1011052
11	NaN	NaN	7.66667	NaN	NaN	7.66667	132.833	10110125	10110126	10110123	920.771	1031.82	908.787	1030.62	8	17	17.6667	1011057
11	NaN	NaN	8.66667	NaN	NaN	8.66667	131.833	10110119	10110120	10110124	863.247	1036.22	859.253	1019.44	8	16	17.6667	1011057
11	NaN	NaN	8.5	NaN	NaN	8.5	132	10110121	10110122	1011095	831.29	998.667	820.105	985.085	8	19.6667	17.5	1011049
11	17.8333	NaN	NaN	19	NaN	NaN	101.5	10110132	10110133	1011013	526.098	751.13	510.119	742.608	6	20.3333	22.1667	101109
11	NaN	NaN	21.1667	16.1667	NaN	NaN	119.333	10110135	10110136	10110132	732.222	613.448	711.45	612.382	7	17.8333	20.3333	1011013
11	NaN	NaN	5	NaN	NaN	5	135.5	10110140	10110141	10110136	847.668	318.774	822.901	323.568	8	16.1667	17.8333	10110132
11	22.1667	NaN	NaN	22.6667	NaN	NaN	78.1667	10110145	10110146	1011010	714.113	840.877	707.722	829.16	5	19.1667	21.5	101106
11	16.5	NaN	NaN	17.5	NaN	NaN	100.333	10110148	10110149	10110145	477.629	868.041	472.835	885.618	6	22.1667	19.1667	1011010
11	18.1667	NaN	NaN	17.6667	NaN	NaN	116.833	10110151	10110152	10110148	662.981	1037.41	654.992	1023.57	7	16.5	22.1667	10110145
11	NaN	NaN	5.5	NaN	NaN	5.5	135	10110154	10110155	10110151	817.975	975.631	813.714	994.272	8	18.1667	16.5	10110148
11	NaN	NaN	6	NaN	NaN	6	134.5	10110159	10110160	10110152	919.439	1235.28	920.504	1222.5	8	17.6667	16.5	10110148
11	19.3333	NaN	NaN	19.8333	NaN	NaN	117.833	10110164	10110165	10110149	353.528	944.739	348.734	928.76	7	17.5	22.1667	10110145
11	NaN	NaN	3.33333	NaN	NaN	3.33333	137.167	10110167	10110168	10110164	437.016	1025.83	423.435	1008.25	8	19.3333	17.5	10110149
11	NaN	NaN	2.83333	NaN	NaN	2.83333	137.667	10110172	10110173	10110165	349.533	1223.57	345.139	1213.98	8	19.8333	17.5	10110149
11	16.5	NaN	NaN	16.3333	NaN	NaN	100.833	10110177	10110178	10110146	698.667	714.912	692.808	710.651	6	22.6667	19.1667	1011010
11	NaN	NaN	23.1667	21.3333	NaN	NaN	117.333	10110180	10110181	10110177	552.196	898.134	530.359	915.178	7	16.5	22.6667	10110146
11	NaN	NaN	1.83333	NaN	NaN	1.83333	138.667	10110185	10110186	10110181	620.105	907.455	617.176	894.938	8	21.3333	16.5	10110177
11	19.5	NaN	NaN	20.8333	NaN	NaN	117.167	10110190	10110191	10110178	568.042	526.896	551.264	517.309	7	16.3333	22.6667	10110146
11	NaN	NaN	3.83333	NaN	NaN	3.83333	136.667	10110193	10110194	10110190	569.24	538.481	558.055	544.473	8	19.5	16.3333	10110178
11	NaN	NaN	2.5	NaN	NaN	2.5	138	10110198	10110199	10110191	754.592	508.521	737.415	528.095	8	20.8333	16.3333	10110178
11	18	NaN	NaN	18.5	NaN	NaN	57.6667	10110201	10110202	101107	764.18	694.273	749.799	685.884	4	20.1667	22.3333	101103
11	23.6667	NaN	NaN	22.6667	NaN	NaN	76.1667	10110205	10110206	10110202	569.24	517.309	556.457	520.106	5	18.5	20.1667	101107
11	22.8333	NaN	NaN	22.5	NaN	NaN	99.8333	10110208	10110209	10110205	453.395	509.719	433.022	506.923	6	23.6667	18.5	10110202
11	17.3333	NaN	NaN	NaN	NaN	16.5	122.667	10110211	10110212	10110208	303.195	528.494	298.002	516.91	7	22.8333	23.6667	10110205
11	NaN	NaN	0.5	NaN	NaN	0.5	140	10110214	10110215	10110211	413.048	581.623	411.051	571.637	8	17.3333	22.8333	10110208
11	17.1667	NaN	NaN	15	NaN	NaN	122.333	10110221	10110222	10110209	529.293	425.831	519.307	439.014	7	22.5	23.6667	10110205
11	NaN	NaN	1	NaN	NaN	1	139.5	10110224	10110225	10110221	579.626	265.645	569.24	270.838	8	17.1667	22.5	10110209
11	NaN	NaN	3.16667	NaN	NaN	3.16667	137.333	10110230	10110229	10110222	326.764	322.37	331.557	337.949	8	15	22.5	10110209
11	18.5	NaN	NaN	NaN	31.3333	NaN	98.8333	10110234	10110235	10110206	508.92	415.845	495.339	406.258	6	22.6667	18.5	10110202
11	19.3333	NaN	NaN	19.5	NaN	NaN	117.333	10110237	10110238	10110234	503.727	421.038	482.955	428.628	7	18.5	22.6667	10110206
11	NaN	NaN	0.333333	NaN	NaN	0.333333	136.667	10110240	10110241	10110237	652.728	349.533	653.927	335.552	8	19.3333	18.5	10110234
11	NaN	NaN	3.66667	NaN	NaN	3.66667	136.833	10110243	10110244	10110238	483.754	433.821	472.569	445.805	8	19.5	18.5	10110234
11	NaN	NaN	20	NaN	NaN	20	120.5	10110249	10110250	10110133	639.946	677.495	627.962	671.104	7	19	20.3333	1011013
11	19.3333	NaN	NaN	18.5	NaN	NaN	75.6667	10110254	10110255	10110201	789.213	692.542	787.615	672.835	5	18	20.1667	101107
11	20.6667	NaN	NaN	20.1667	NaN	NaN	95	10110256	10110257	10110254	545.805	709.32	522.902	704.26	6	19.3333	18	10110201
11	18.5	NaN	NaN	19.6667	NaN	NaN	115.667	10110258	10110259	10110256	478.428	844.606	462.982	854.193	7	20.6667	19.3333	10110254
11	NaN	NaN	6.33333	NaN	NaN	6.33333	134.167	10110260	10110261	10110258	484.287	707.189	473.901	710.385	8	18.5	20.6667	10110256
11	23.3333	NaN	NaN	24.3333	NaN	NaN	94.1667	10110262	10110263	10110255	916.376	667.109	902.395	663.914	6	18.5	18	10110201
11	17	NaN	NaN	17.5	NaN	NaN	117.5	10110264	10110265	10110262	913.181	693.874	893.607	692.675	7	23.3333	18.5	10110255
11	NaN	NaN	6	NaN	NaN	6	134.5	10110266	10110267	10110264	940.344	780.558	922.368	786.949	8	17	23.3333	10110262
11	NaN	NaN	5.5	NaN	NaN	5.5	135	10110268	10110269	10110265	905.591	700.265	882.422	690.678	8	17.5	23.3333	10110262
11	17.8333	NaN	NaN	17.3333	NaN	NaN	115.167	10110270	10110271	10110257	729.426	804.925	733.021	788.547	7	20.1667	19.3333	10110254
11	NaN	NaN	7.5	NaN	NaN	7.5	133	10110272	10110273	10110270	921.57	1021.44	910.384	1016.24	8	17.8333	20.1667	10110257
11	NaN	NaN	8	NaN	NaN	8	132.5	10110289	10110290	10110271	677.895	926.629	674.965	911.982	8	17.3333	20.1667	10110257
11	NaN	NaN	5.16667	NaN	NaN	5.16667	135.333	10110285	10110286	10110259	653.661	692.276	643.274	697.602	8	19.6667	20.6667	10110256
11	15.5	NaN	NaN	14.1667	NaN	NaN	118.5	10110276	10110277	10110263	915.711	532.223	906.39	538.614	7	24.3333	18.5	10110255
11	NaN	NaN	6.5	NaN	NaN	6.5	134	10110280	10110281	10110276	682.156	529.826	674.167	539.147	8	15.5	24.3333	10110263
11	NaN	NaN	7.83333	NaN	NaN	7.83333	132.667	10110283	10110284	10110277	774.566	404.127	760.984	421.704	8	14.1667	24.3333	10110263
12	18	NaN	NaN	NaN	NaN	14.8333	8.66667	101201	101202	101203	791.477	1303.86	785.085	1276.16	2	NaN	NaN	1012000
12	21.5	NaN	NaN	19.6667	NaN	NaN	26.6667	101207	101208	101201	1304.66	1120.1	1294.27	1140.08	3	18	NaN	101203
12	NaN	NaN	42.1667	NaN	NaN	24.6667	48.1667	1012013	1012014	101207	1269.51	1161.65	1264.71	1149.66	4	21.5	18	101201
12	NaN	NaN	9.83333	17	NaN	NaN	46.3333	1012011	1012012	101208	1247.13	1103.33	1229.56	1104.13	4	19.6667	18	101201
12	NaN	NaN	8.16667	17	NaN	NaN	63.3333	1012020	1012021	1012012	1342.21	944.339	1331.82	933.953	5	17	19.6667	101208
12	17	NaN	NaN	17.5	NaN	NaN	80.3333	1012026	1012027	1012021	1295.87	1084.15	1278.29	1086.55	6	17	17	1012012
12	16	NaN	NaN	17.3333	NaN	NaN	97.8333	1012030	1012031	1012027	993.074	1203.99	983.487	1219.97	7	17.5	17	1012021
12	20.6667	NaN	NaN	NaN	NaN	26.6667	113.833	1012034	1012033	1012030	1231.95	1176.03	1255.12	1191.21	8	16	17.5	1012027
12	NaN	NaN	6	NaN	NaN	6	134.5	1012036	1012037	1012034	1322.23	1164.05	1315.84	1182.42	9	20.6667	16	1012030
12	19.3333	NaN	NaN	NaN	NaN	2.66667	115.167	1012040	1012041	1012031	882.954	1201.73	868.041	1200.13	8	17.3333	17.5	1012027
12	NaN	NaN	6	NaN	NaN	6	134.5	1012043	1012044	1012040	967.109	1169.77	962.315	1180.96	9	19.3333	17.3333	1012031
12	19	NaN	NaN	16.3333	NaN	NaN	97.3333	1012047	1012048	1012026	1070.97	1112.25	1052.86	1118.64	7	17	17	1012021
12	NaN	NaN	24.1667	NaN	NaN	24.1667	116.333	1012050	1012051	1012047	1045.14	921.037	1036.62	907.721	8	19	17	1012026
12	NaN	NaN	26.8333	NaN	NaN	26.8333	113.667	1012055	1012056	1012048	996.669	826.763	990.278	812.915	8	16.3333	17	1012026
13	NaN	NaN	98.3333	78.1667	NaN	NaN	22.3333	101302	101303	101301	384.287	14.381	352.33	7.989	2	NaN	NaN	1013000
13	NaN	25.8333	NaN	NaN	NaN	40	100.5	101306	101307	101303	535.285	189.347	522.502	175.765	3	78.1667	NaN	101301
14	NaN	NaN	13.3333	17.6667	NaN	NaN	17.5	101402	101403	101401	547.269	150.998	524.1	145.406	2	NaN	NaN	1014000
14	NaN	NaN	4.33333	19.5	NaN	NaN	35.1667	101408	101407	101403	592.01	150.199	610.385	156.591	3	17.6667	NaN	101401
14	18	NaN	NaN	NaN	27.1667	NaN	54.6667	1014011	1014012	101407	416.244	226.897	404.26	226.098	4	19.5	17.6667	101403
14	NaN	NaN	0.333333	NaN	NaN	0.333333	72.6667	1014014	1014015	1014011	450.598	288.415	439.413	299.6	5	18	19.5	101407
15	17.6667	NaN	NaN	15.8333	NaN	NaN	16.1667	101502	101503	101501	450.598	611.184	438.614	626.364	2	NaN	NaN	1015000
15	24.8333	NaN	NaN	NaN	30.3333	NaN	33.8333	101505	101506	101502	261.251	300.399	256.458	317.177	3	17.6667	NaN	101501
15	16.3333	NaN	NaN	16	NaN	NaN	58.6667	101508	101509	101505	186.151	150.199	184.554	168.575	4	24.8333	17.6667	101502
15	14.3333	NaN	NaN	14.6667	NaN	NaN	75	1015011	1015012	101508	445.006	78.295	440.212	71.105	5	16.3333	24.8333	101505
15	NaN	NaN	11.3333	NaN	NaN	51.1667	89.3333	1015014	1015015	1015011	362.583	195.073	356.191	208.388	6	14.3333	16.3333	101508
15	17.5	NaN	NaN	16.8333	NaN	NaN	89.6667	1015019	1015020	1015012	350.332	215.845	338.615	225.965	6	14.6667	16.3333	101508
15	NaN	NaN	1.16667	17.6667	NaN	NaN	107.167	1015022	1015023	1015019	314.114	17.71	302.396	25.699	7	17.5	14.6667	1015012
15	NaN	NaN	4.83333	NaN	NaN	15.6667	124.833	1015026	1015027	1015023	483.488	118.375	470.705	115.18	8	17.6667	17.5	1015019
15	15	NaN	NaN	16	NaN	NaN	74.6667	1015032	1015033	101509	271.238	279.76	263.781	291.477	5	16	24.8333	101505
15	20	NaN	NaN	19.8333	NaN	NaN	89.6667	1015035	1015036	1015032	404.393	359.121	399.6	343.142	6	15	16	101509
15	NaN	25.6667	NaN	NaN	NaN	30.8333	109.667	1015038	1015039	1015035	345.805	420.372	336.218	419.307	7	20	15	1015032
15	37.3333	NaN	NaN	23.6667	NaN	NaN	32	1015044	1015045	101503	455.791	521.57	438.215	531.157	3	15.8333	NaN	101501
15	16.1667	NaN	NaN	16.1667	NaN	NaN	69.3333	1015047	1015048	1015044	583.088	437.949	569.24	439.546	4	37.3333	15.8333	101503
15	16.6667	NaN	NaN	13.3333	NaN	NaN	85.5	1015051	1015052	1015048	605.991	503.461	582.023	508.255	5	16.1667	37.3333	1015044
15	17	NaN	NaN	NaN	35.3333	NaN	102.167	1015054	1015055	1015051	507.456	590.279	499.466	603.594	6	16.6667	16.1667	1015048
15	NaN	NaN	21.3333	NaN	NaN	21.3333	119.167	1015057	1015058	1015054	406.79	884.286	394.54	888.014	7	17	16.6667	1015051
15	14.1667	NaN	NaN	15	NaN	NaN	106.5	1015063	1015064	1015020	370.306	217.31	356.324	210.918	7	16.8333	14.6667	1015012
15	NaN	NaN	19.8333	NaN	NaN	19.8333	120.667	1015066	1015067	1015063	270.838	204.127	258.055	207.323	8	14.1667	16.8333	1015020
15	29.3333	NaN	NaN	28.8333	NaN	NaN	90.6667	1015071	1015072	1015033	180.159	333.022	181.225	321.304	6	16	16	101509
15	NaN	NaN	17.6667	NaN	15	NaN	120	1015074	1015075	1015071	186.018	247.27	166.311	241.411	7	29.3333	16	1015033
15	19	NaN	NaN	19.1667	NaN	NaN	109.5	1015079	1015080	1015036	415.578	364.979	409.187	379.893	7	19.8333	15	1015032
15	NaN	NaN	12	NaN	NaN	12	128.5	1015082	1015083	1015079	401.73	318.109	390.545	314.913	8	19	19.8333	1015036
15	NaN	NaN	11.8333	NaN	NaN	11.8333	128.667	1015086	1015087	1015080	597.735	288.814	580.159	280.292	8	19.1667	19.8333	1015036
15	15.3333	NaN	NaN	16.8333	NaN	NaN	55.6667	1015094	1015095	1015045	292.809	460.585	283.222	449	4	23.6667	15.8333	101503
15	16.1667	NaN	NaN	14.5	NaN	NaN	71	1015097	1015098	1015094	341.943	552.063	333.954	537.682	5	15.3333	23.6667	1015045
15	17.5	NaN	NaN	16.6667	NaN	NaN	87.1667	10150100	10150101	1015097	482.556	527.296	477.762	508.122	6	16.1667	15.3333	1015094
15	19.1667	NaN	NaN	16.8333	NaN	NaN	104.667	10150103	10150104	10150100	711.051	573.634	695.072	568.84	7	17.5	16.1667	1015097
15	NaN	NaN	16.6667	NaN	NaN	16.6667	123.833	10150106	10150107	10150103	537.283	766.843	526.098	775.897	8	19.1667	17.5	10150100
15	15.8333	NaN	NaN	14	NaN	NaN	85.5	10150109	10150110	1015047	608.121	449.4	594.806	440.345	5	16.1667	37.3333	1015044
15	17.5	NaN	NaN	17	NaN	NaN	101.333	10150112	10150113	10150109	564.979	519.706	562.316	539.413	6	15.8333	16.1667	1015047
15	NaN	NaN	21.6667	15.8333	NaN	NaN	118.833	10150115	10150116	10150112	476.031	643.807	468.574	631.557	7	17.5	15.8333	10150109
15	14.6667	NaN	NaN	13.8333	NaN	NaN	98.8333	10150119	10150120	1015052	729.559	850.464	728.494	835.551	6	13.3333	16.1667	1015048
15	NaN	NaN	27	20.5	NaN	NaN	113.5	10150122	10150123	10150119	888.014	687.482	878.427	675.764	7	14.6667	13.3333	1015052
15	NaN	NaN	19	NaN	NaN	19	121.5	10150128	10150129	1015064	248.335	287.217	234.487	283.488	8	15	16.8333	1015020
15	NaN	NaN	21	NaN	NaN	19.8333	119.5	10150135	10150136	1015072	110.652	419.44	97.869	418.242	7	28.8333	16	1015033
15	19.6667	NaN	NaN	17.5	NaN	NaN	85.5	10150144	10150145	1015098	348.734	410.785	332.756	424.633	6	14.5	15.3333	1015094
15	18	NaN	NaN	17.5	NaN	NaN	105.167	10150147	10150148	10150144	365.778	494.407	359.919	488.548	7	19.6667	14.5	1015098
15	16.3333	NaN	NaN	NaN	NaN	14.1667	123.167	10150150	10150151	10150147	268.575	364.979	257.39	360.186	8	18	19.6667	10150144
15	NaN	NaN	1	NaN	NaN	1	139.5	10150153	10150154	10150150	150.333	285.086	135.952	276.031	9	16.3333	18	10150147
15	14.8333	NaN	NaN	16.5	NaN	NaN	103.833	10150156	10150157	10150101	638.215	492.809	622.236	490.678	7	16.6667	16.1667	1015097
15	20.8333	NaN	NaN	19.3333	NaN	NaN	118.667	10150159	10150160	10150156	598.268	566.311	581.757	559.386	8	14.8333	16.6667	10150101
15	NaN	NaN	1	NaN	NaN	1	139.5	10150162	10150163	10150159	734.087	504.526	731.956	490.146	9	20.8333	14.8333	10150156
15	17.8333	NaN	NaN	17.6667	NaN	NaN	121.5	10150165	10150166	10150104	745.272	442.21	727.695	443.807	8	16.8333	17.5	10150100
15	NaN	NaN	1.16667	NaN	NaN	1.16667	139.333	10150168	10150169	10150165	710.651	613.181	709.053	630.225	9	17.8333	16.8333	10150104
15	NaN	9.83333	NaN	NaN	7.16667	NaN	99.5	10150173	10150174	10150110	587.349	599.067	582.556	579.892	6	14	16.1667	1015047
15	17.8333	NaN	NaN	19.5	NaN	NaN	118.333	10150177	10150178	10150113	478.694	790.278	473.901	803.594	7	17	15.8333	10150109
15	NaN	NaN	4.33333	NaN	NaN	4.33333	136.167	10150180	10150181	10150177	708.254	748.734	696.004	756.19	8	17.8333	17	10150113
15	NaN	NaN	5.83333	NaN	NaN	5.83333	134.667	10150184	10150185	10150116	461.65	912.781	450.465	922.901	8	15.8333	17.5	10150112
15	NaN	24.3333	NaN	NaN	NaN	27.8333	112.667	10150187	10150188	10150120	784.419	936.749	779.626	949	7	13.8333	13.3333	1015052
15	NaN	NaN	6.5	NaN	NaN	6.5	134	10150191	10150192	10150123	576.164	816.377	565.512	806.257	8	20.5	14.6667	10150119
15	15	NaN	NaN	17.6667	NaN	NaN	72.5	10150194	10150195	1015095	288.282	216.111	281.89	229.427	5	16.8333	23.6667	1015045
15	14.8333	NaN	NaN	16.3333	NaN	NaN	90.1667	10150198	10150199	10150195	499.733	93.076	485.352	81.891	6	17.6667	16.8333	1015095
15	NaN	NaN	0.5	NaN	NaN	1.33333	105	10150201	10150202	10150198	508.787	19.308	497.07	33.156	7	14.8333	17.6667	10150195
15	16.5	NaN	NaN	18	NaN	NaN	103	10150206	10150207	10150145	265.645	253.661	251.664	236.484	7	17.5	14.5	1015098
15	16.3333	NaN	NaN	17.8333	NaN	NaN	119.5	10150209	10150210	10150206	313.182	230.492	299.201	242.876	8	16.5	17.5	10150145
15	NaN	NaN	4.66667	NaN	NaN	4.66667	135.833	10150212	10150213	10150209	292.01	172.969	280.026	181.757	9	16.3333	16.5	10150206
15	17.3333	NaN	NaN	17.6667	NaN	NaN	122.667	10150217	10150218	10150148	502.13	574.034	492.143	586.816	8	17.5	19.6667	10150144
15	NaN	NaN	0.5	NaN	NaN	0.5	140	10150220	10150221	10150217	522.502	498.934	506.923	500.132	9	17.3333	17.5	10150148
15	18.1667	NaN	NaN	17.6667	NaN	NaN	120.333	10150225	10150226	10150157	483.754	469.373	471.371	458.188	8	16.5	16.6667	10150101
15	NaN	NaN	2	NaN	NaN	2	138.5	10150228	10150229	10150225	185.353	460.984	174.167	454.992	9	18.1667	16.5	10150157
15	NaN	NaN	2.5	NaN	NaN	2.5	138	10150233	10150234	10150160	659.519	369.906	649.932	378.694	9	19.3333	14.8333	10150156
15	NaN	NaN	2.66667	NaN	NaN	2.66667	137.833	10150237	10150238	10150178	308.788	570.039	300.798	582.822	8	19.5	17	10150113
15	19.3333	NaN	NaN	19.8333	NaN	NaN	106.5	10150243	10150244	10150199	378.694	85.885	356.724	91.078	7	16.3333	17.6667	10150195
15	NaN	NaN	14.6667	NaN	NaN	14.6667	125.833	10150246	10150247	10150243	233.289	139.414	216.511	144.607	8	19.3333	16.3333	10150199
15	NaN	NaN	14.1667	NaN	NaN	14.1667	126.333	10150253	10150254	10150244	581.623	242.476	567.243	229.294	8	19.8333	16.3333	10150199
15	NaN	NaN	2.5	NaN	NaN	2.5	138	10150257	10150258	10150226	406.657	468.574	388.282	450.199	9	17.6667	16.5	10150157
15	NaN	NaN	0.166667	NaN	NaN	0.166667	140.333	10150262	10150263	10150218	422.236	520.106	415.845	510.918	9	17.6667	17.5	10150148
15	NaN	NaN	3.16667	NaN	NaN	3.16667	137.333	10150265	10150266	10150210	226.498	166.578	220.905	180.559	9	17.8333	16.5	10150206
15	15	NaN	NaN	NaN	NaN	4.16667	121	10150270	10150271	10150207	134.221	133.422	131.025	115.845	8	18	17.5	10150145
15	NaN	NaN	4.5	NaN	NaN	4.5	136	10150273	10150274	10150270	116.644	153.395	115.446	141.411	9	15	18	10150207
15	NaN	NaN	1.33333	NaN	NaN	1.33333	139.167	10150280	10150281	10150166	917.841	537.283	909.053	527.429	9	17.6667	16.8333	10150104
15	13.8333	NaN	NaN	14.6667	NaN	NaN	87.5	10150284	10150285	10150194	463.381	111.851	443.408	103.861	6	15	16.8333	1015095
15	16.1667	NaN	NaN	20.3333	NaN	NaN	102.167	10150287	10150288	10150285	425.032	221.704	419.839	220.905	7	14.6667	15	10150194
15	14.3333	NaN	NaN	14.6667	NaN	NaN	118.333	10150290	10150291	10150287	506.923	226.098	491.743	229.294	8	16.1667	14.6667	10150285
15	NaN	NaN	7.83333	NaN	NaN	7.83333	132.667	10150293	10150294	10150290	508.122	172.969	500.132	186.551	9	14.3333	16.1667	10150287
15	NaN	NaN	7.5	NaN	NaN	7.5	133	10150298	10150299	10150291	677.895	323.169	674.3	305.991	9	14.6667	16.1667	10150287
15	15.8333	NaN	NaN	16.8333	NaN	NaN	122.5	10150303	10150304	10150288	473.368	246.87	474.167	261.251	8	20.3333	14.6667	10150285
15	NaN	NaN	2.16667	NaN	NaN	2.16667	138.333	10150306	10150307	10150303	576.031	155.393	571.237	165.779	9	15.8333	20.3333	10150288
15	15.1667	NaN	NaN	16	NaN	NaN	101.333	10150311	10150312	10150284	458.987	203.728	447.403	205.326	7	13.8333	15	10150194
15	16.8333	NaN	NaN	NaN	NaN	7.83333	117.333	10150315	10150316	10150312	454.46	91.212	434.487	98.402	8	16	13.8333	10150284
15	NaN	NaN	6.33333	NaN	NaN	6.33333	134.167	10150318	10150319	10150315	575.631	168.974	558.055	174.966	9	16.8333	16	10150312
15	NaN	NaN	1.16667	NaN	NaN	1.16667	139.333	10150325	10150326	10150304	553.661	282.423	544.872	296.804	9	16.8333	20.3333	10150288
15	14.3333	NaN	NaN	15.1667	NaN	NaN	116.5	10150329	10150330	10150311	472.569	158.322	457.656	165.246	8	15.1667	13.8333	10150284
15	NaN	NaN	9.66667	NaN	NaN	4.66667	130.833	10150332	10150333	10150329	323.435	74.168	319.174	89.614	9	14.3333	15.1667	10150311
15	NaN	NaN	8.83333	NaN	NaN	8.83333	131.667	10150337	10150338	10150330	555.658	118.908	552.462	130.626	9	15.1667	15.1667	10150311
16	19	NaN	NaN	17.1667	NaN	NaN	11	101602	101603	101601	1137.68	1013.05	1119.57	1022.63	2	NaN	NaN	1016000
16	NaN	NaN	1.5	20.6667	NaN	NaN	30	101605	101606	101602	1375.23	928.893	1361.38	921.436	3	19	NaN	101601
16	NaN	NaN	3.16667	18	NaN	NaN	50.6667	101609	1016010	101606	1344.34	660.451	1321.97	648.734	4	20.6667	19	101602
16	24.6667	NaN	NaN	19.3333	NaN	NaN	68.6667	1016013	1016014	1016010	1133.42	565.645	1116.38	574.167	5	18	20.6667	101606
16	28	NaN	NaN	34.3333	NaN	NaN	93.3333	1016016	1016017	1016013	1406.12	376.031	1401.86	360.053	6	24.6667	18	1016010
16	NaN	NaN	19.1667	NaN	NaN	19.1667	121.333	1016019	1016020	1016016	1276.16	265.246	1276.16	249.267	7	28	24.6667	1016013
16	20.3333	NaN	NaN	18.5	NaN	NaN	28.1667	1016025	1016026	101603	1202.66	1247.4	1189.88	1233.55	3	17.1667	NaN	101601
16	NaN	NaN	12.6667	23	NaN	NaN	48.5	1016027	1016028	1016025	1188.81	1402.93	1176.03	1413.58	4	20.3333	17.1667	101603
16	16.1667	NaN	NaN	21.8333	NaN	NaN	88	1016031	1016032	1016014	1280.42	712.648	1272.97	699.866	6	19.3333	18	1016010
16	24.8333	NaN	NaN	17.6667	NaN	NaN	104.167	1016034	1016035	1016031	1328.36	831.956	1313.45	812.781	7	16.1667	19.3333	1016014
16	NaN	NaN	11.5	NaN	NaN	11.5	129	1016036	1016037	1016034	1272.97	919.306	1254.86	922.502	8	24.8333	16.1667	1016031
16	NaN	NaN	2.66667	NaN	NaN	2.66667	127.667	1016040	1016041	1016017	1413.58	208.788	1396.54	207.723	7	34.3333	24.6667	1016013
16	18.8333	NaN	NaN	18.8333	NaN	NaN	46.6667	1016044	1016045	1016026	1068.44	932.089	1049.27	934.219	4	18.5	17.1667	101603
16	NaN	27.6667	NaN	38.5	NaN	NaN	65.5	1016047	1016048	1016044	1166.44	849	1147.27	838.347	5	18.8333	18.5	1016026
16	16.1667	NaN	NaN	17.3333	NaN	NaN	71.5	1016052	1016053	1016028	1053.53	1226.1	1041.81	1241.01	5	23	20.3333	1016025
16	18.1667	NaN	NaN	21.1667	NaN	NaN	87.6667	1016055	1016056	1016052	1235.68	1011.98	1227.16	1029.03	6	16.1667	23	1016028
16	21.8333	NaN	NaN	22	NaN	NaN	105.833	1016057	1016058	1016055	1286.82	1023.7	1279.36	1033.29	7	18.1667	16.1667	1016052
16	NaN	NaN	12.8333	NaN	NaN	12.8333	127.667	1016060	1016061	1016057	1234.62	1147.27	1212.25	1138.75	8	21.8333	18.1667	1016055
16	22.8333	NaN	NaN	26.5	NaN	NaN	109.833	1016063	1016064	1016032	1207.99	681.756	1195.2	672.169	7	21.8333	19.3333	1016014
16	NaN	NaN	7.83333	NaN	NaN	7.83333	132.667	1016066	1016067	1016063	1132.36	789.346	1131.29	802.129	8	22.8333	21.8333	1016032
16	NaN	NaN	18.6667	NaN	NaN	18.6667	121.833	1016069	1016070	1016035	1176.03	937.415	1155.79	936.35	8	17.6667	16.1667	1016031
16	21.1667	NaN	NaN	20.6667	NaN	NaN	65.5	1016075	1016076	1016045	1008.79	834.086	992.808	834.086	5	18.8333	18.5	1016026
16	22.3333	NaN	NaN	25	NaN	NaN	86.1667	1016079	1016080	1016076	1227.16	1015.18	1219.7	1022.63	6	20.6667	18.8333	1016045
16	25.8333	NaN	NaN	27.6667	NaN	NaN	108.5	1016083	1016084	1016079	1167.51	1055.66	1166.44	1069.51	7	22.3333	20.6667	1016076
16	NaN	NaN	6.16667	NaN	NaN	6.16667	134.333	1016086	1016087	1016083	1265.51	1074.83	1261.25	1058.85	8	25.8333	22.3333	1016079
16	NaN	NaN	8.83333	NaN	NaN	29.8333	104	1016089	1016090	1016048	1350.73	863.913	1334.75	851.13	6	38.5	18.8333	1016044
16	18.8333	NaN	NaN	21.6667	NaN	NaN	88.8333	1016093	1016094	1016053	1123.83	1180.29	1112.12	1185.62	6	17.3333	23	1016028
16	20.8333	NaN	NaN	18	NaN	NaN	107.667	1016096	1016097	1016093	1222.9	1149.4	1216.51	1160.05	7	18.8333	17.3333	1016053
16	NaN	NaN	2.66667	NaN	NaN	12	128.5	1016099	10160100	1016096	1373.1	1074.83	1369.9	1057.79	8	20.8333	18.8333	1016093
16	21.1667	NaN	NaN	17.5	NaN	NaN	108.833	10160104	10160105	1016056	1255.92	1212.25	1244.2	1202.66	7	21.1667	16.1667	1016052
16	NaN	NaN	10.5	NaN	NaN	10.5	130	10160106	10160107	10160104	1356.06	1412.51	1335.82	1406.12	8	21.1667	21.1667	1016056
16	NaN	NaN	4.16667	NaN	NaN	4.16667	136.333	10160111	10160112	1016064	1323.03	641.277	1307.06	628.494	8	26.5	21.8333	1016032
16	23.8333	NaN	NaN	29	NaN	NaN	86.6667	1016081	1016082	1016075	1174.96	903.327	1161.12	910.784	6	21.1667	18.8333	1016045
16	21	NaN	NaN	20	NaN	NaN	110.5	10160114	10160115	1016081	1305.86	1031.82	1303.46	1052.19	7	23.8333	21.1667	1016075
16	NaN	NaN	9	NaN	NaN	9	131.5	10160117	10160118	10160114	1266.31	1088.95	1256.32	1100.53	8	21	23.8333	1016081
16	NaN	NaN	10	NaN	NaN	10	130.5	10160122	10160123	10160115	1277.49	794.939	1259.12	778.96	8	20	23.8333	1016081
16	NaN	NaN	2.83333	NaN	NaN	2.83333	126.333	10160127	10160128	10160105	1377.76	1334.62	1364.58	1351.8	8	17.5	21.1667	1016056
16	NaN	NaN	14.8333	NaN	NaN	14.8333	125.667	10160131	10160132	1016097	1283.49	1249.93	1267.91	1250.73	8	18	18.8333	1016093
16	23	NaN	NaN	21	NaN	NaN	110.5	10160137	10160138	1016094	1158.85	1077.36	1149.66	1066.58	7	21.6667	17.3333	1016053
16	NaN	NaN	7	NaN	NaN	7	133.5	10160140	10160141	10160137	1092.14	1025.83	1084.95	1008.25	8	23	21.6667	1016094
16	NaN	NaN	9	NaN	NaN	9	131.5	10160143	10160144	10160138	1124.5	1081.36	1112.12	1095.74	8	21	21.6667	1016094
16	NaN	NaN	4.33333	NaN	NaN	4.33333	136.167	10160147	10160148	1016084	1265.11	959.918	1261.91	945.937	8	27.6667	22.3333	1016079
16	21.3333	NaN	NaN	20.1667	NaN	NaN	111.167	10160150	10160151	1016080	1259.92	997.069	1249.53	981.09	7	25	20.6667	1016076
16	NaN	NaN	8	NaN	NaN	8	132.5	10160153	10160154	10160150	1328.63	986.683	1328.63	1003.46	8	21.3333	25	1016080
16	NaN	NaN	9.16667	NaN	NaN	9.16667	131.333	10160156	10160157	10160151	1397.73	1025.83	1376.96	1036.62	8	20.1667	25	1016080
16	NaN	NaN	12.6667	NaN	NaN	12.6667	127.833	10160158	10160159	1016058	1128.89	982.288	1108.12	979.492	8	22	18.1667	1016055
16	NaN	NaN	24.8333	NaN	NaN	24.8333	115.667	10160162	10160163	1016082	1146.47	854.06	1140.08	865.644	7	29	21.1667	1016075

## Sheet: rep2
Lineage ID	Sibling 1 cycle length	Sibling 1 time to death	Sibling 1 time to cell loss	Sibling 2 cycle length	Sibling 2 time to death	Sibling 2 time to cell loss	Birth time	Sibling 1 ID	Sibling 2 ID	Mother ID	Birth x position sibling 1	Birth y position sibling 1	Birth x position sibling 2	Birth y position sibling 2	Generation	Mother cycle length	Grandmother cycle length	Grandmother ID
1	14.9333	NaN	NaN	15.6	NaN	NaN	6.4	10102	10103	10101	956	688	940	696	2	NaN	NaN	101000
1	14	NaN	NaN	13.3333	NaN	NaN	21.3333	10105	10106	10102	856.167	799.5	836.167	802.167	3	14.9333	NaN	10101
1	13.2	NaN	NaN	13.3333	NaN	NaN	35.3333	10108	10109	10105	1674.67	969.333	1661.33	960	4	14	14.9333	10102
1	NaN	NaN	0.266667	NaN	NaN	0.266667	48.5333	101011	101012	10108	1733.33	1140	1745.33	1141.33	5	13.2	14	10105
1	12	NaN	NaN	13.3333	NaN	NaN	48.6667	101014	101015	10109	1484.17	980.833	1468.17	974.833	5	13.3333	14	10105
1	14.4	NaN	NaN	15.6	NaN	NaN	60.6667	101017	101018	101014	1227.5	752.167	1222.17	770.833	6	12	13.3333	10109
1	14.4	NaN	NaN	16.9333	NaN	NaN	75.0667	101020	101021	101017	1184.17	604.167	1180.83	586.167	7	14.4	12	101014
1	NaN	38.9333	NaN	NaN	44.8	NaN	89.4667	101023	101024	101020	1107.5	444.167	1087.5	444.833	8	14.4	14.4	101017
1	15.0667	NaN	NaN	15.0667	NaN	NaN	22	101027	101028	10103	1248.5	1014.83	1235.17	1018.83	3	15.6	NaN	10101
1	NaN	25.7333	NaN	14.1333	NaN	NaN	37.0667	101030	101031	101027	1351.17	972.167	1339.83	987.5	4	15.0667	15.6	10103
1	12.8	NaN	NaN	14.6667	NaN	NaN	34.6667	101035	101036	10106	1333.33	1021.33	1314.67	1032	4	13.3333	14.9333	10102
1	NaN	NaN	0.266667	NaN	NaN	0.266667	47.4667	101038	101039	101035	1748	1224	1746	1234	5	12.8	13.3333	10106
1	21.2	NaN	NaN	NaN	NaN	10.4	62	101041	101042	101015	1732	1291	1732.5	1307.5	6	13.3333	13.3333	10109
1	14.5333	NaN	NaN	14.6667	NaN	NaN	83.2	101044	101045	101041	1362.5	1159	1350.5	1145.5	7	21.2	13.3333	101015
1	15.2	NaN	NaN	13.4667	NaN	NaN	97.7333	101047	101048	101044	1346.5	1324	1324.5	1337.5	8	14.5333	21.2	101041
1	21.4667	NaN	NaN	17.6	NaN	NaN	112.933	101050	101051	101047	1201	1073	1182	1058	9	15.2	14.5333	101044
1	NaN	NaN	7.06667	NaN	NaN	7.06667	134.4	101052	101053	101050	1381	380	1362.5	374	10	21.4667	15.2	101047
1	17.3333	NaN	NaN	15.4667	NaN	NaN	76.2667	101057	101058	101018	1314	792.5	1297	808	7	15.6	12	101014
1	NaN	31.4667	NaN	NaN	26.8	NaN	93.6	101060	101061	101057	1180	677	1175	653.5	8	17.3333	15.6	101018
1	NaN	NaN	34.6667	NaN	35.8667	NaN	92	101064	101065	101021	1476.5	897	1471	913.5	8	16.9333	14.4	101017
1	NaN	NaN	0.266667	NaN	NaN	0.266667	37.0667	101068	101069	101028	1442	1111	1441	1124	4	15.0667	15.6	10103
1	12.5333	NaN	NaN	NaN	22.5333	NaN	51.2	101071	101072	101031	1555	965	1542	956	5	14.1333	15.0667	101027
1	NaN	NaN	0.266667	NaN	NaN	0.266667	63.7333	101074	101075	101071	1669	965	1669	955	6	12.5333	14.1333	101031
1	16.2667	NaN	NaN	15.6	NaN	NaN	49.3333	101077	101078	101036	1227.5	903	1208	892	5	14.6667	13.3333	10106
1	13.4667	NaN	NaN	16.8	NaN	NaN	65.6	101080	101081	101077	1200.5	939	1190.5	934.5	6	16.2667	14.6667	101036
1	14	NaN	NaN	14.8	NaN	NaN	79.0667	101083	101084	101080	1556	893.5	1544.5	903.5	7	13.4667	16.2667	101077
1	14.8	NaN	NaN	13.7333	NaN	NaN	93.0667	101086	101087	101083	1261.5	947	1243.5	958.5	8	14	13.4667	101080
1	13.6	NaN	NaN	14.8	NaN	NaN	107.867	101089	101090	101086	1168	830.5	1151	830	9	14.8	14	101083
1	NaN	13.8667	NaN	NaN	NaN	20	121.467	101092	101093	101089	1060.5	780	1057.5	761.5	10	13.6	14.8	101086
1	14.6667	NaN	NaN	18.9333	NaN	NaN	97.8667	101098	101099	101045	1177	1095.5	1176.5	1115	8	14.6667	21.2	101041
1	20.1333	NaN	NaN	18.1333	NaN	NaN	112.533	1010101	1010102	101098	1138.5	1142.5	1142	1126	9	14.6667	14.6667	101045
1	NaN	NaN	8.8	NaN	NaN	8.8	132.667	1010104	1010105	1010101	869	1192	861.5	1207	10	20.1333	14.6667	101098
1	18.6667	NaN	NaN	NaN	NaN	30.2667	111.2	1010108	1010109	101048	1161.5	918	1155.5	931.5	9	13.4667	14.5333	101044
1	NaN	NaN	11.6	NaN	NaN	11.6	129.867	1010110	1010111	1010108	810	1278.5	805	1297	10	18.6667	13.4667	101048
1	NaN	NaN	10.9333	NaN	NaN	10.9333	130.533	1010114	1010115	101051	1299	735.5	1288	726.5	10	17.6	15.2	101047
1	15.0667	NaN	NaN	17.4667	NaN	NaN	91.7333	1010118	1010119	101058	1178	1003.5	1170	993	8	15.4667	15.6	101018
1	NaN	19.6	NaN	NaN	31.2	NaN	106.8	1010121	1010122	1010118	1192.5	876	1191.5	865	9	15.0667	15.4667	101058
1	15.8667	NaN	NaN	17.8667	NaN	NaN	64.9333	1010129	1010130	101078	1350.17	875.833	1349.5	859.833	6	15.6	14.6667	101036
1	14.4	NaN	NaN	12.8	NaN	NaN	80.8	1010132	1010133	1010129	1319.5	875.833	1311.5	855.167	7	15.8667	15.6	101078
1	11.7333	NaN	NaN	12.8	NaN	NaN	95.2	1010135	1010136	1010132	1267.5	1228	1241.5	1245.5	8	14.4	15.8667	1010129
1	13.3333	NaN	NaN	12	NaN	NaN	106.933	1010139	1010138	1010135	1058.5	1546.17	1072.83	1553.83	9	11.7333	14.4	1010132
1	17.4667	NaN	NaN	17.7333	NaN	NaN	120.267	1010141	1010142	1010139	933.5	1566.83	930.5	1555.83	10	13.3333	11.7333	1010135
1	NaN	NaN	3.73333	NaN	NaN	3.73333	137.733	1010144	1010145	1010141	957.833	1493.83	951.5	1512.5	11	17.4667	13.3333	1010139
1	13.6	NaN	NaN	15.8667	NaN	NaN	82.4	1010149	1010150	101081	1225	1241.5	1231.5	1221.5	7	16.8	16.2667	101077
1	15.6	NaN	NaN	14.2667	NaN	NaN	96	1010152	1010153	1010149	1183.5	870	1173	854.5	8	13.6	16.8	101081
1	18.6667	NaN	NaN	NaN	NaN	29.8667	111.6	1010155	1010156	1010152	1145.5	622.5	1142	606	9	15.6	13.6	1010149
1	NaN	NaN	11.2	NaN	NaN	11.2	130.267	1010158	1010159	1010155	1018	918	1017.5	934.5	10	18.6667	15.6	1010152
1	15.6	NaN	NaN	18.9333	NaN	NaN	93.8667	1010315	1010316	101084	1484.17	1074.83	1469.5	1078.17	8	14.8	13.4667	101080
1	NaN	NaN	32	NaN	NaN	32	109.467	1010318	1010319	1010315	1595.83	1403.83	1587.83	1411.17	9	15.6	14.8	101084
1	NaN	NaN	28.6667	NaN	NaN	28.6667	112.8	1010321	1010322	1010316	1521.17	999.5	1505.5	986.833	9	18.9333	14.8	101084
1	NaN	NaN	12.9333	13.8667	NaN	NaN	106.8	1010172	1010173	101087	1294	1092.5	1275	1079.5	9	13.7333	14	101083
1	NaN	NaN	18.8	NaN	NaN	18.8	122.667	1010297	1010298	101090	1029.83	1070.5	1015.5	1079.83	10	14.8	14.8	101086
1	23.8667	NaN	NaN	NaN	20.6667	NaN	116.8	1010182	1010183	101099	972.5	1191.83	967.167	1180.83	9	18.9333	14.6667	101045
1	NaN	NaN	0.8	NaN	NaN	0.8	140.667	1010185	1010186	1010182	966.833	1223.5	955.5	1212.83	10	23.8667	18.9333	101099
1	NaN	NaN	10.8	NaN	NaN	10.8	130.667	1010190	1010191	1010102	631.833	978.833	630.833	962.5	10	18.1333	14.6667	101098
1	NaN	13.2	NaN	NaN	22.2667	NaN	109.2	1010198	1010199	1010119	1217.5	840.167	1212.17	859.167	9	17.4667	15.4667	101058
1	12.6667	NaN	NaN	12	NaN	NaN	82.8	1010203	1010204	1010130	1470	1020.5	1462.5	1046.5	7	17.8667	15.6	101078
1	NaN	NaN	13.4667	12.9333	NaN	NaN	95.4667	1010206	1010207	1010203	1525	996.5	1510.5	1003.5	8	12.6667	17.8667	1010130
1	13.0667	NaN	NaN	13.8667	NaN	NaN	93.6	1010211	1010212	1010133	1279.17	795.5	1290.83	779.5	8	12.8	15.8667	1010129
1	14.9333	NaN	NaN	12	NaN	NaN	106.667	1010214	1010215	1010211	1327.17	1008.17	1319.83	1026.5	9	13.0667	12.8	1010133
1	18.6667	NaN	NaN	NaN	NaN	19.8667	121.6	1010217	1010218	1010214	775.167	925.167	772.167	903.833	10	14.9333	13.0667	1010211
1	NaN	NaN	1.2	NaN	NaN	1.2	140.267	1010221	1010222	1010217	757.833	1021.83	752.5	1005.5	11	18.6667	14.9333	1010214
1	12.8	NaN	NaN	NaN	NaN	33.4667	108	1010226	1010227	1010136	1067.17	1383.83	1065.5	1405.5	9	12.8	14.4	1010132
1	NaN	NaN	20.6667	NaN	NaN	20.6667	120.8	1010229	1010230	1010226	1021.5	1525.17	1004.83	1522.5	10	12.8	12.8	1010136
1	NaN	NaN	3.46667	NaN	NaN	3.46667	138	1010236	1010237	1010142	665.5	1588	660.5	1573.5	11	17.7333	13.3333	1010139
1	13.7333	NaN	NaN	12.5333	NaN	NaN	98.2667	1010241	1010242	1010150	1215	1337	1205	1345	8	15.8667	16.8	101081
1	16.5333	NaN	NaN	NaN	NaN	29.4667	112	1010244	1010245	1010241	938.5	1321	906	1327	9	13.7333	15.8667	1010150
1	NaN	NaN	12.9333	NaN	NaN	12.9333	128.533	1010247	1010248	1010244	919.167	1575.83	898.167	1583.5	10	16.5333	13.7333	1010241
1	13.4667	NaN	NaN	NaN	NaN	31.2	110.267	1010251	1010252	1010153	1207.17	1018.17	1205.17	1003.83	9	14.2667	13.6	1010149
1	NaN	NaN	17.7333	NaN	NaN	17.7333	123.733	1010254	1010255	1010251	1064.5	1097.83	1061.83	1080.83	10	13.4667	14.2667	1010153
1	16.5333	NaN	NaN	NaN	NaN	22.8	118.667	1010270	1010271	1010215	1342.83	990.833	1328.17	990.167	10	12	13.0667	1010211
1	NaN	NaN	6.26667	NaN	NaN	6.26667	135.2	1010273	1010274	1010270	1299.17	977.833	1294.83	993.5	11	16.5333	12	1010215
1	NaN	NaN	0.266667	NaN	NaN	0.266667	120.667	1010277	1010278	1010173	1194.5	1107.5	1188.83	1093.5	10	13.8667	13.7333	101087
1	12.5333	NaN	NaN	13.0667	NaN	NaN	94.8	1010284	1010285	1010204	1204.5	1286.5	1200.5	1275	8	12	17.8667	1010130
1	14.2667	NaN	NaN	NaN	NaN	34.1333	107.333	1010287	1010288	1010284	997.167	1396.17	988.833	1408.17	9	12.5333	12	1010204
1	16.9333	NaN	NaN	NaN	NaN	19.8667	121.6	1010290	1010291	1010287	1142.5	1539.17	1144.83	1553.83	10	14.2667	12.5333	1010284
1	NaN	NaN	2.93333	NaN	NaN	2.93333	138.533	1010293	1010294	1010290	1108.17	1577.83	1102.5	1593.83	11	16.9333	14.2667	1010287
1	NaN	NaN	33.0667	NaN	NaN	33.0667	108.4	1010303	1010304	1010207	1632	1047.5	1631.5	1069.5	9	12.9333	12.6667	1010203
1	NaN	NaN	34	NaN	NaN	34	107.467	1010306	1010307	1010212	1111	459	1098	444	9	13.8667	12.8	1010133
1	NaN	NaN	22.5333	NaN	NaN	22.5333	118.933	1010233	1010234	1010138	1127	1448.5	1122	1431.5	10	12	11.7333	1010135
1	NaN	NaN	30.6667	NaN	NaN	30.6667	110.8	1010309	1010310	1010242	1344	1228	1320.5	1231	9	12.5333	15.8667	1010150
1	NaN	NaN	33.6	NaN	NaN	33.6	107.867	1010312	1010313	1010285	1025	1192.5	1009	1191	9	13.0667	12	1010204
2	13.3333	NaN	NaN	13.6	NaN	NaN	7.46667	10202	10203	10201	1111.5	841.167	1110.83	856.5	2	NaN	NaN	102000
2	NaN	NaN	0.266667	NaN	NaN	0.266667	20.8	10205	10206	10202	1160	845.333	1166.67	857.333	3	13.3333	NaN	10201
2	NaN	NaN	0.266667	NaN	NaN	0.266667	21.0667	10208	10209	10203	1255	1117	1251	1106	3	13.6	NaN	10201
3	16.5333	NaN	NaN	17.3333	NaN	NaN	12.8	10302	10303	10301	1230.5	991.5	1224	964.5	2	NaN	NaN	103000
3	NaN	NaN	0.8	NaN	NaN	0.8	29.3333	10304	10305	10302	1345.5	1002	1339	981.5	3	16.5333	NaN	10301
3	14.4	NaN	NaN	15.7333	NaN	NaN	30.1333	10307	10308	10303	1535	969.5	1515.5	962	3	17.3333	NaN	10301
3	NaN	NaN	0.266667	NaN	NaN	0.266667	44.5333	103010	103011	10307	1704	783	1701	790	4	14.4	17.3333	10303
3	15.3333	NaN	NaN	15.4667	NaN	NaN	45.8667	103013	103014	10308	1349.5	831	1348	815.5	4	15.7333	17.3333	10303
3	15.7333	NaN	NaN	15.7333	NaN	NaN	61.2	103016	103017	103013	1420.5	768	1418.5	742	5	15.3333	15.7333	10308
3	15.0667	NaN	NaN	14.6667	NaN	NaN	76.9333	103019	103020	103016	1263	1137	1249.5	1139.5	6	15.7333	15.3333	103013
3	15.0667	NaN	NaN	16.1333	NaN	NaN	92	103022	103023	103019	961	1326	957.5	1311.5	7	15.0667	15.7333	103016
3	14.2667	NaN	NaN	17.7333	NaN	NaN	107.067	103025	103026	103022	1040.5	1489	1021	1494.5	8	15.0667	15.0667	103019
3	14.9333	NaN	NaN	18.2667	NaN	NaN	121.333	103028	103029	103025	833	1442	832.5	1427.5	9	14.2667	15.0667	103022
3	NaN	NaN	5.2	NaN	NaN	5.2	136.267	103031	103032	103028	740.5	1731	738	1750	10	14.9333	14.2667	103025
3	15.8667	NaN	NaN	14.9333	NaN	NaN	61.3333	103035	103036	103014	1463	876.5	1463.5	857.5	5	15.4667	15.7333	10308
3	15.0667	NaN	NaN	15.2	NaN	NaN	77.2	103038	103039	103035	1492	1023.5	1482.5	1031	6	15.8667	15.4667	103014
3	15.8667	NaN	NaN	14.8	NaN	NaN	92.2667	103041	103042	103038	1385.5	1007	1368	1009	7	15.0667	15.8667	103035
3	14.6667	NaN	NaN	16.1333	NaN	NaN	108.133	103044	103045	103041	1375.5	988	1359.5	983	8	15.8667	15.0667	103038
3	NaN	NaN	18.6667	NaN	NaN	18.6667	122.8	103047	103048	103044	1272.17	1192.17	1265.83	1174.83	9	14.6667	15.8667	103041
3	15.8667	NaN	NaN	15.0667	NaN	NaN	76.9333	103052	103053	103017	1296.5	493	1296.5	468	6	15.7333	15.3333	103013
3	16	NaN	NaN	15.4667	NaN	NaN	92.8	103055	103056	103052	1148	573	1128	588	7	15.8667	15.7333	103017
3	NaN	26.2667	NaN	NaN	NaN	32.6667	108.8	103058	103059	103055	1045.5	483	1026	481.5	8	16	15.8667	103052
3	15.0667	NaN	NaN	13.8667	NaN	NaN	91.6	103074	103075	103020	1364.5	1143	1347.5	1143	7	14.6667	15.7333	103016
3	16	NaN	NaN	15.6	NaN	NaN	92	103063	103064	103053	1207	328	1207.5	312	7	15.0667	15.7333	103017
3	15.0667	NaN	NaN	15.7333	NaN	NaN	108	103067	103066	103063	1121	357.5	1127.5	338	8	16	15.0667	103053
3	NaN	NaN	18.4	NaN	NaN	18.4	123.067	103069	103070	103067	952	435.5	935	430.5	9	15.0667	16	103063
3	16.5333	NaN	NaN	15.7333	NaN	NaN	106.667	103077	103078	103074	1156.5	1259	1138.5	1252	8	15.0667	14.6667	103020
3	17.4667	NaN	NaN	15.4667	NaN	NaN	123.2	103080	103081	103077	1099	1340.5	1083	1333.5	9	16.5333	15.0667	103074
3	NaN	NaN	0.8	NaN	NaN	0.8	140.667	103083	103084	103080	778.5	1360	778	1343	10	17.4667	16.5333	103077
3	14.5333	NaN	NaN	16.2667	NaN	NaN	107.6	103088	103089	103064	1141.5	385	1126.5	380.5	8	15.6	15.0667	103053
3	NaN	NaN	19.3333	18.4	NaN	NaN	122.133	103091	103092	103088	1420	326	1409.5	336	9	14.5333	15.6	103064
3	14.9333	NaN	NaN	15.3333	NaN	NaN	108.133	103096	103097	103023	1015.5	1387	1003.5	1373.5	8	16.1333	15.0667	103019
3	NaN	NaN	18.4	NaN	NaN	13.6	123.067	103098	103099	103096	793.5	1480.5	787	1463	9	14.9333	16.1333	103023
3	NaN	NaN	16.6667	NaN	NaN	16.6667	124.8	1030102	1030103	103026	831	1271	829.5	1289	9	17.7333	15.0667	103022
3	NaN	NaN	1.86667	NaN	NaN	1.86667	139.6	1030106	1030107	103029	703	1411	694.5	1430	10	18.2667	14.2667	103025
3	16.2667	NaN	NaN	15.7333	NaN	NaN	76.2667	1030111	1030112	103036	1576	782	1550.5	783	6	14.9333	15.4667	103014
3	NaN	10	NaN	NaN	10	NaN	92.5333	1030114	1030115	1030111	1616.5	695.5	1615	717.5	7	16.2667	14.9333	103036
3	NaN	NaN	3.86667	13.6	NaN	NaN	92.4	1030118	1030119	103039	1642.83	671.167	1629.83	685.833	7	15.2	15.8667	103035
3	NaN	NaN	8.93333	13.8667	NaN	NaN	106	1030122	1030123	1030119	1354.5	657.167	1346.17	670.5	8	13.6	15.2	103039
3	15.4667	NaN	NaN	15.8667	NaN	NaN	107.067	1030126	1030127	103042	1279.83	800.5	1266.17	801.833	8	14.8	15.0667	103038
3	NaN	NaN	18.9333	14.1333	NaN	NaN	122.533	1030129	1030130	1030126	1407.5	959.167	1392.5	962.5	9	15.4667	14.8	103042
3	NaN	NaN	17.2	NaN	NaN	17.2	124.267	1030133	1030134	103045	1149.5	959.833	1133.83	974.833	9	16.1333	15.8667	103041
3	NaN	NaN	33.2	17.2	NaN	NaN	108.267	1030138	1030139	103056	1090.5	444	1076	462	8	15.4667	15.8667	103052
3	14.9333	NaN	NaN	NaN	NaN	11.8667	105.467	1030145	1030146	103075	1433.17	1075.17	1411.17	1068.17	8	13.8667	14.6667	103020
3	NaN	NaN	21.0667	NaN	NaN	21.0667	120.4	1030148	1030149	1030145	1323.83	1254.5	1312.17	1243.83	9	14.9333	13.8667	103075
3	NaN	NaN	19.0667	NaN	NaN	19.0667	122.4	1030154	1030153	103078	1249.5	1580.83	1262.83	1573.83	9	15.7333	15.0667	103074
3	NaN	NaN	18	NaN	NaN	18	123.467	1030158	1030157	103097	1091	1310.5	1095	1331	9	15.3333	16.1333	103023
3	NaN	NaN	17.7333	NaN	NaN	17.7333	123.733	1030162	1030163	103066	1040	219	1037	200.5	9	15.7333	16	103063
3	NaN	NaN	2.8	NaN	NaN	2.8	138.667	1030169	1030168	103081	894.5	1295.83	913.833	1296.83	10	15.4667	16.5333	103077
3	NaN	NaN	0.933333	NaN	NaN	0.933333	140.533	1030173	1030174	103092	1378.5	425.167	1373.17	416.5	10	18.4	14.5333	103088
3	14.5333	NaN	NaN	16.8	NaN	NaN	92	1030178	1030179	1030112	1597	783	1573.5	794	7	15.7333	14.9333	103036
3	NaN	NaN	27.0667	NaN	4.93333	NaN	106.533	1030180	1030181	1030178	1423.5	829.5	1410	821	8	14.5333	15.7333	1030112
3	NaN	NaN	21.6	NaN	NaN	21.6	119.867	1030184	1030185	1030123	1338.5	516	1314	519.5	9	13.8667	13.6	1030119
3	NaN	NaN	18.5333	NaN	NaN	18.5333	122.933	1030188	1030189	1030127	1231.17	742.5	1213.5	735.167	9	15.8667	14.8	103042
3	NaN	NaN	16	NaN	NaN	16	125.467	1030194	1030195	1030139	864.833	533.833	855.833	551.167	9	17.2	15.4667	103056
3	NaN	NaN	4.8	NaN	NaN	4.8	136.667	1030197	1030198	1030130	1366.83	970.167	1353.17	980.833	10	14.1333	15.4667	1030126
3	NaN	14.9333	NaN	NaN	15.4667	NaN	123.867	1030202	1030203	103089	1176	278.5	1172	294.5	9	16.2667	15.6	103064
3	16.8	NaN	NaN	26.6667	NaN	NaN	108.8	1030215	1030216	1030179	1263.83	990.833	1251.5	990.5	8	16.8	15.7333	1030112
3	NaN	NaN	0.266667	NaN	NaN	0.266667	125.6	1030218	1030219	1030215	1287.5	754.833	1284.5	764.5	9	16.8	16.8	1030179
3	NaN	NaN	6	NaN	NaN	6	135.467	1030223	1030224	1030216	1156.17	1054.5	1158.5	1035.83	9	26.6667	16.8	1030179
6	NaN	NaN	0.8	NaN	NaN	0.8	3.6	10602	10603	10601	1730.67	1748	1720	1734.67	2	NaN	NaN	106000
10	14.5333	NaN	NaN	14.4	NaN	NaN	3.73333	101002	101003	101001	601.333	122.667	598.667	108	2	NaN	NaN	1010000
10	NaN	NaN	13.3333	12.8	NaN	NaN	18.2667	101005	101006	101002	866.833	313.5	865.5	294.833	3	14.5333	NaN	101001
10	14.8	NaN	NaN	15.0667	NaN	NaN	18.1333	1010010	1010011	101003	855.833	236.833	853.833	214.167	3	14.4	NaN	101001
10	NaN	NaN	0.266667	NaN	NaN	0.266667	32.9333	1010013	1010014	1010010	1324.83	282.167	1308.17	274.833	4	14.8	14.4	101003
10	14.9333	NaN	NaN	13.4667	NaN	NaN	33.2	1010016	1010017	1010011	775	141	773	124.5	4	15.0667	14.4	101003
10	19.8667	NaN	NaN	18.1333	NaN	NaN	48.1333	1010019	1010020	1010016	792	232	779.5	242.5	5	14.9333	15.0667	1010011
10	15.4667	NaN	NaN	17.6	NaN	NaN	68	1010022	1010023	1010019	950.5	508	927	504	6	19.8667	14.9333	1010016
10	12.4	NaN	NaN	12.8	NaN	NaN	83.4667	1010025	1010026	1010022	920	484.5	909	508	7	15.4667	19.8667	1010019
10	16.9333	NaN	NaN	14.9333	NaN	NaN	96.2667	1010030	1010031	1010026	878.5	676.5	869.5	696.5	8	12.8	15.4667	1010022
10	14.6667	NaN	NaN	14.4	NaN	NaN	95.8667	1010027	1010028	1010025	1002.5	273	982.5	266	8	12.4	15.4667	1010022
10	NaN	NaN	28.2667	NaN	NaN	28.2667	113.2	1010034	1010033	1010030	676	723.5	670	741	9	16.9333	12.8	1010026
10	14.1333	NaN	NaN	15.3333	NaN	NaN	31.0667	1010037	1010038	101006	689	332	674.5	346.5	4	12.8	14.5333	101002
10	12.4	NaN	NaN	14.1333	NaN	NaN	45.2	1010040	1010041	1010037	774.5	405	765.5	389.5	5	14.1333	12.8	101006
10	15.4667	NaN	NaN	18	NaN	NaN	57.6	1010043	1010044	1010040	818.5	235	793.5	231.5	6	12.4	14.1333	1010037
10	14.6667	NaN	NaN	15.2	NaN	NaN	73.0667	1010046	1010047	1010043	855	291.5	843.5	301.5	7	15.4667	12.4	1010040
10	12.9333	NaN	NaN	13.7333	NaN	NaN	87.7333	1010049	1010050	1010046	920	344	910	357	8	14.6667	15.4667	1010043
10	15.2	NaN	NaN	15.4667	NaN	NaN	100.667	1010052	1010053	1010049	995.5	217	982	208.5	9	12.9333	14.6667	1010046
10	17.8667	NaN	NaN	NaN	NaN	25.6	115.867	1010055	1010056	1010052	1162.5	76	1156	87.5	10	15.2	12.9333	1010049
10	NaN	NaN	7.73333	NaN	NaN	7.73333	133.733	1010058	1010059	1010055	1063.5	48.5	1042.5	46.5	11	17.8667	15.2	1010052
10	13.7333	NaN	NaN	14	NaN	NaN	46.6667	1010062	1010063	1010017	823.167	129.5	803.833	122.833	5	13.4667	15.0667	1010011
10	14.2667	NaN	NaN	NaN	NaN	2.66667	60.4	1010065	1010066	1010062	770.5	167.5	763.167	150.833	6	13.7333	13.4667	1010017
10	14.5333	NaN	NaN	NaN	NaN	8.66667	74.6667	1010068	1010069	1010065	804.5	219.5	798.5	210.167	7	14.2667	13.7333	1010062
10	13.8667	NaN	NaN	14.2667	NaN	NaN	89.2	1010071	1010072	1010068	726.833	329.5	711.5	336.833	8	14.5333	14.2667	1010065
10	18.9333	NaN	NaN	15.6	NaN	NaN	103.067	1010074	1010075	1010071	760.167	290.833	746.167	279.5	9	13.8667	14.5333	1010068
10	NaN	NaN	19.4667	NaN	NaN	19.4667	122	1010077	1010078	1010074	511.5	593	506.5	612.5	10	18.9333	13.8667	1010071
10	14.2667	NaN	NaN	16.1333	NaN	NaN	46.4	1010082	1010083	1010038	723.5	551	709	545.5	5	15.3333	12.8	101006
10	14	NaN	NaN	13.8667	NaN	NaN	60.6667	1010085	1010086	1010082	748	731	733.5	731.5	6	14.2667	15.3333	1010038
10	14.9333	NaN	NaN	16.4	NaN	NaN	74.6667	1010088	1010089	1010085	729	995.5	714	1011.5	7	14	14.2667	1010082
10	NaN	NaN	0.266667	NaN	NaN	0.266667	89.6	1010091	1010092	1010088	775	1465	779	1478	8	14.9333	14	1010085
10	17.2	NaN	NaN	11.7333	NaN	NaN	60.6667	1010094	1010095	1010063	1015.5	93.5	1009	110.5	6	14	13.4667	1010017
10	14.4	NaN	NaN	14.6667	NaN	NaN	77.8667	1010097	1010098	1010094	1093	169	1077.5	179	7	17.2	14	1010063
10	14	NaN	NaN	15.3333	NaN	NaN	92.2667	10100100	10100101	1010097	1010.5	470	996.5	459.5	8	14.4	17.2	1010094
10	13.4667	NaN	NaN	NaN	NaN	35.2	106.267	10100103	10100104	10100100	1318	472	1313.5	489	9	14	14.4	1010097
10	NaN	NaN	21.7333	NaN	NaN	21.7333	119.733	10100106	10100107	10100103	1134.5	758.5	1128.5	744	10	13.4667	14	10100100
10	NaN	NaN	0.266667	NaN	NaN	0.266667	66.2667	10100111	10100112	1010020	1424	564	1407	560	6	18.1333	14.9333	1010016
10	12.1333	NaN	NaN	13.4667	NaN	NaN	85.6	10100114	10100115	1010023	1048.5	547.5	1029	560.5	7	17.6	19.8667	1010019
10	12.8	NaN	NaN	13.4667	NaN	NaN	97.7333	10100117	10100118	10100114	1093	601.5	1080.5	591.5	8	12.1333	17.6	1010023
10	15.0667	NaN	NaN	NaN	NaN	30.9333	110.533	10100120	10100121	10100117	1069	509	1073.5	490.5	9	12.8	12.1333	10100114
10	NaN	NaN	11.3333	NaN	NaN	15.8667	125.6	10100123	10100124	10100120	1037.5	238	1024	227	10	15.0667	12.8	10100117
10	18.2667	NaN	NaN	16.8	NaN	NaN	59.3333	10100127	10100128	1010041	1245.17	653.5	1230.17	651.5	6	14.1333	14.1333	1010037
10	NaN	NaN	12	15.6	NaN	NaN	77.6	10100130	10100131	10100127	1136.83	351.833	1118.5	358.5	7	18.2667	14.1333	1010041
10	NaN	NaN	9.06667	NaN	NaN	30.9333	110.533	10100133	10100134	1010027	1033.83	53.5	1019.83	53.833	9	14.6667	12.4	1010025
10	16	NaN	NaN	16.4	NaN	NaN	75.6	10100140	10100141	1010044	413.5	306.167	417.5	288.5	7	18	12.4	1010040
10	17.4667	NaN	NaN	16.6667	NaN	NaN	91.6	10100143	10100144	10100140	410.833	413.833	397.5	399.833	8	16	18	1010044
10	14.8	NaN	NaN	NaN	NaN	32.4	109.067	10100146	10100147	10100143	443.167	493.167	433.167	494.5	9	17.4667	16	10100140
10	NaN	NaN	17.6	NaN	NaN	17.6	123.867	10100149	10100150	10100146	328.5	508.833	331.5	491.833	10	14.8	17.4667	10100143
10	12.6667	NaN	NaN	13.7333	NaN	NaN	88.2667	10100153	10100154	1010047	1001.5	395.833	995.833	382.167	8	15.2	15.4667	1010043
10	17.3333	NaN	NaN	14.8	NaN	NaN	100.933	10100156	10100157	10100153	805.167	210.5	804.167	233.833	9	12.6667	15.2	1010047
10	22.2667	NaN	NaN	NaN	NaN	23.2	118.267	10100159	10100160	10100156	919.833	291.833	906.5	287.167	10	17.3333	12.6667	10100153
10	NaN	NaN	0.933333	NaN	NaN	0.933333	140.533	10100162	10100163	10100159	1086.83	564.167	1071.83	564.167	11	22.2667	17.3333	10100156
10	NaN	22.9333	NaN	NaN	NaN	31.2	110.267	10100167	10100168	1010028	1182.83	193.833	1166.5	189.5	9	14.4	12.4	1010025
10	16.6667	NaN	NaN	NaN	NaN	8.26667	101.467	10100171	10100172	1010050	748.833	177.833	730.833	175.167	9	13.7333	14.6667	1010046
10	NaN	NaN	23.3333	NaN	NaN	23.3333	118.133	10100174	10100175	10100171	823.833	151.5	809.833	172.5	10	16.6667	13.7333	1010050
10	14.2667	NaN	NaN	14.6667	NaN	NaN	99.0667	10100179	10100180	10100115	793.5	542	775	536.5	8	13.4667	17.6	1010023
10	19.7333	NaN	NaN	NaN	NaN	28.1333	113.333	10100182	10100183	10100179	676	620	662.25	605.5	9	14.2667	13.4667	10100115
10	NaN	NaN	8.4	NaN	NaN	8.4	133.067	10100185	10100186	10100182	674.5	522.5	671.167	539.833	10	19.7333	14.2667	10100179
10	16.2667	NaN	NaN	NaN	NaN	30.2667	111.2	10100189	10100190	1010031	996.5	754.833	977.5	770.833	9	14.9333	12.8	1010026
10	NaN	NaN	14	NaN	NaN	14	127.467	10100192	10100193	10100189	774.167	984.5	761.167	996.167	10	16.2667	14.9333	1010031
10	15.2	NaN	NaN	NaN	NaN	25.3333	116.133	10100198	10100199	1010053	931.5	120.833	913.167	121.833	10	15.4667	12.9333	1010049
10	NaN	NaN	10.1333	NaN	NaN	10.1333	131.333	10100201	10100202	10100198	977.5	274.833	962.833	288.5	11	15.2	15.4667	1010053
10	14.6667	NaN	NaN	16.6667	NaN	NaN	103.467	10100207	10100208	1010072	1022	313.5	1004.5	310	9	14.2667	14.5333	1010068
10	17.3333	NaN	NaN	NaN	NaN	23.3333	118.133	10100210	10100211	10100207	938.833	728.5	928.167	737.833	10	14.6667	14.2667	1010072
10	NaN	NaN	6	NaN	NaN	6	135.467	10100213	10100214	10100210	824.167	872.833	821.833	858.833	11	17.3333	14.6667	10100207
10	18	NaN	NaN	NaN	NaN	22.8	118.667	10100218	10100219	1010075	594.5	471.5	592	455	10	15.6	13.8667	1010071
10	NaN	NaN	4.8	NaN	NaN	4.8	136.667	10100221	10100222	10100218	519.5	525.5	506.167	532.167	11	18	15.6	1010075
10	16.9333	NaN	NaN	18.1333	NaN	NaN	62.5333	10100228	10100229	1010083	763.5	425	759.5	410.5	6	16.1333	15.3333	1010038
10	14.1333	NaN	NaN	14.5333	NaN	NaN	79.4667	10100231	10100232	10100228	668	301	666.5	316	7	16.9333	16.1333	1010083
10	12.9333	NaN	NaN	13.2	NaN	NaN	93.6	10100234	10100235	10100231	687	361	675.5	355	8	14.1333	16.9333	10100228
10	13.8667	NaN	NaN	NaN	NaN	34.9333	106.533	10100237	10100238	10100234	790.833	196.5	775.167	203.5	9	12.9333	14.1333	10100231
10	19.2	NaN	NaN	NaN	NaN	21.0667	120.4	10100240	10100241	10100237	479.167	352.5	458.5	352.167	10	13.8667	12.9333	10100234
10	NaN	NaN	1.86667	NaN	NaN	1.86667	139.6	10100243	10100244	10100240	590.5	303.5	580.167	314.167	11	19.2	13.8667	10100237
10	14.2667	NaN	NaN	16.4	NaN	NaN	74.5333	10100248	10100249	1010086	690.833	779.833	685.5	774.167	7	13.8667	14.2667	1010082
10	15.2	NaN	NaN	15.6	NaN	NaN	88.8	10100251	10100252	10100248	399.167	952.833	376.167	948.833	8	14.2667	13.8667	1010086
10	NaN	6.8	NaN	NaN	6.8	NaN	104	10100254	10100255	10100251	149.167	1212.83	133.833	1198.83	9	15.2	14.2667	10100248
10	15.7333	NaN	NaN	16.4	NaN	NaN	104.4	10100390	10100391	10100252	534.5	667.167	517.167	674.5	9	15.6	14.2667	10100248
10	NaN	NaN	21.3333	NaN	NaN	21.3333	120.133	10100393	10100394	10100390	444.167	639.5	433.5	652.833	10	15.7333	15.6	10100252
10	NaN	NaN	20.6667	NaN	NaN	20.6667	120.8	10100396	10100397	10100391	588.167	756.167	570.167	762.833	10	16.4	15.6	10100252
10	15.7333	NaN	NaN	18.5333	NaN	NaN	90.9333	10100382	10100383	10100249	608.5	989.167	599.167	998.5	8	16.4	13.8667	1010086
10	NaN	NaN	34.8	NaN	NaN	34.8	106.667	10100385	10100386	10100382	305.833	993.833	299.167	1014.5	9	15.7333	16.4	10100249
10	NaN	NaN	32	NaN	NaN	32	109.467	10100388	10100389	10100383	430.5	1079.83	415.167	1092.5	9	18.5333	16.4	10100249
10	NaN	NaN	34.6667	NaN	NaN	34.6667	106.8	10100379	10100380	10100235	603.5	619.5	582.167	636.167	9	13.2	14.1333	10100231
10	12.1333	NaN	NaN	12.5333	NaN	NaN	94	10100371	10100372	10100232	437.833	439.167	437.167	451.167	8	14.5333	16.9333	10100228
10	NaN	NaN	35.3333	NaN	NaN	35.3333	106.133	10100374	10100375	10100371	120.833	439.5	110.833	420.167	9	12.1333	14.5333	10100232
10	NaN	NaN	34.9333	NaN	NaN	34.9333	106.533	10100377	10100378	10100372	334.167	523.5	330.833	537.5	9	12.5333	14.5333	10100232
10	13.3333	NaN	NaN	14.1333	NaN	NaN	80.6667	10100352	10100353	10100229	872	512.5	846	505.5	7	18.1333	16.1333	1010083
10	13.2	NaN	NaN	14.8	NaN	NaN	94	10100355	10100356	10100352	932.5	349	915	344	8	13.3333	18.1333	10100229
10	NaN	NaN	34.2667	NaN	NaN	34.2667	107.2	10100357	10100358	10100355	964.5	849.5	950.5	837	9	13.2	13.3333	10100352
10	NaN	NaN	32.6667	NaN	NaN	32.6667	108.8	10100359	10100360	10100356	1014.5	776.167	1003.17	772.167	9	14.8	13.3333	10100352
10	14.1333	NaN	NaN	13.6	NaN	NaN	94.8	10100362	10100363	10100353	709.167	433.5	706.5	417.5	8	14.1333	18.1333	10100229
10	NaN	NaN	32.5333	NaN	NaN	32.5333	108.933	10100365	10100366	10100362	571.833	702.5	569.167	721.167	9	14.1333	14.1333	10100353
10	NaN	NaN	33.0667	NaN	NaN	33.0667	108.4	10100368	10100369	10100363	245.167	672.5	241.167	688.5	9	13.6	14.1333	10100353
10	NaN	NaN	21.3333	NaN	NaN	21.3333	120.133	10100349	10100350	10100208	989	333.5	983.5	320	10	16.6667	14.2667	1010072
10	NaN	NaN	27.7333	NaN	NaN	27.7333	113.733	10100346	10100347	10100180	820.5	473.5	808	487	9	14.6667	13.4667	10100115
10	NaN	NaN	25.7333	NaN	NaN	25.7333	115.733	10100342	10100343	10100157	776.5	337.5	762	349.5	10	14.8	12.6667	10100153
10	17.0667	NaN	NaN	14.6667	NaN	NaN	102	10100333	10100334	10100154	839	370	829	355	9	13.7333	15.2	1010047
10	NaN	NaN	22.4	NaN	NaN	22.4	119.067	10100337	10100336	10100333	618	412	628.5	400	10	17.0667	13.7333	10100154
10	NaN	NaN	24.8	NaN	NaN	24.8	116.667	10100339	10100340	10100334	944.5	76	928	64	10	14.6667	13.7333	10100154
10	13.7333	NaN	NaN	13.2	NaN	NaN	91.0667	10100258	10100259	1010089	1538.5	1740.83	1531.5	1725.17	8	16.4	14	1010085
10	13.8667	NaN	NaN	NaN	NaN	7.33333	104.8	10100261	10100262	10100258	1439.5	1709.5	1418.17	1701.17	9	13.7333	16.4	1010089
10	NaN	NaN	22.8	NaN	NaN	22.8	118.667	10100264	10100265	10100261	1534.5	1595.17	1518.5	1591.83	10	13.8667	13.7333	10100258
10	16.5333	NaN	NaN	NaN	NaN	8.66667	104.267	10100267	10100268	10100259	1525.5	1668.5	1505.5	1675.5	9	13.2	16.4	1010089
10	NaN	NaN	20.6667	NaN	NaN	20.6667	120.8	10100270	10100271	10100267	1406.83	1461.83	1394.83	1472.83	10	16.5333	13.2	10100259
10	NaN	NaN	0.266667	NaN	NaN	0.266667	72.4	10100275	10100276	1010095	1309	105	1308	86	7	11.7333	14	1010063
10	13.0667	NaN	NaN	13.3333	NaN	NaN	92.5333	10100278	10100279	1010098	1393.83	446.167	1375.17	451.5	8	14.6667	17.2	1010094
10	NaN	NaN	35.8667	NaN	NaN	35.8667	105.6	10100281	10100282	10100278	1319.83	417.167	1313.83	439.167	9	13.0667	14.6667	1010098
10	NaN	NaN	35.6	NaN	NaN	35.6	105.867	10100284	10100285	10100279	1225.83	554.5	1212.5	539.167	9	13.3333	14.6667	1010098
10	NaN	NaN	33.8667	NaN	NaN	33.8667	107.6	10100287	10100288	10100101	1132.5	669	1132	687	9	15.3333	14.4	1010097
10	NaN	NaN	30.2667	NaN	NaN	30.2667	111.2	10100290	10100291	10100118	1178.5	529.5	1177	547	9	13.4667	12.1333	10100114
10	20.1333	NaN	NaN	19.3333	NaN	NaN	76.1333	10100293	10100294	10100128	1111.5	449	1092.5	437	7	16.8	14.1333	1010041
10	14.4	NaN	NaN	15.6	NaN	NaN	96.2667	10100296	10100297	10100293	1229.5	589.5	1214.75	562	8	20.1333	16.8	10100128
10	NaN	NaN	30.8	NaN	NaN	30.8	110.667	10100299	10100300	10100296	1286.5	162.833	1279.17	172.833	9	14.4	20.1333	10100293
10	NaN	NaN	29.6	NaN	NaN	29.6	111.867	10100302	10100303	10100297	1188.83	809.5	1185.17	825.5	9	15.6	20.1333	10100293
10	18.6667	NaN	NaN	NaN	NaN	5.6	95.4667	10100305	10100306	10100294	1197.5	248	1193	226.5	8	19.3333	16.8	10100128
10	NaN	NaN	4.66667	NaN	NaN	27.3333	114.133	10100309	10100310	10100305	1044.5	402.5	1042.5	417.5	9	18.6667	19.3333	10100294
10	12.8	NaN	NaN	13.3333	NaN	NaN	93.2	10100313	10100314	10100131	881.5	475	867.5	454.5	8	15.6	18.2667	10100127
10	NaN	NaN	35.4667	NaN	NaN	35.4667	106	10100316	10100317	10100313	831	322	819	320	9	12.8	15.6	10100131
10	NaN	NaN	34.9333	NaN	NaN	34.9333	106.533	10100319	10100320	10100314	897.5	581	889	565.5	9	13.3333	15.6	10100131
10	NaN	NaN	10	13.7333	NaN	NaN	92	10100322	10100323	10100141	199.5	206	185	208	8	16.4	18	1010044
10	NaN	NaN	35.7333	NaN	NaN	35.7333	105.733	10100327	10100328	10100323	73	238	64	216.5	9	13.7333	16.4	10100141
10	NaN	NaN	33.2	NaN	NaN	33.2	108.267	10100330	10100331	10100144	286.5	344	277.5	334	9	16.6667	16	10100140
12	NaN	NaN	2.13333	NaN	NaN	2.13333	5.73333	101202	101203	101201	225.333	12	216	12	2	NaN	NaN	1012000
14	16.2667	NaN	NaN	16.8	NaN	NaN	10.4	101402	101403	101401	802.667	808	794.667	822.667	2	NaN	NaN	1014000
14	18.5333	NaN	NaN	16.5333	NaN	NaN	26.6667	101405	101406	101402	786	933	781.5	929	3	16.2667	NaN	101401
14	16.2667	NaN	NaN	16.9333	NaN	NaN	45.2	101408	101409	101405	643.5	991.5	628	984.5	4	18.5333	16.2667	101402
14	25.4667	NaN	NaN	28.4	NaN	NaN	61.4667	1014011	1014012	101408	721	1294	708	1309.5	5	16.2667	18.5333	101405
14	NaN	29.6	NaN	NaN	13.3333	NaN	86.9333	1014014	1014015	1014011	1047.5	1267	1032	1270.5	6	25.4667	16.2667	101408
14	18.6667	NaN	NaN	15.6	NaN	NaN	27.2	1014019	1014020	101403	1224	978	1216	962	3	16.8	NaN	101401
14	17.7333	NaN	NaN	14.1333	NaN	NaN	45.8667	1014023	1014022	1014019	1250.5	890	1259	875.5	4	18.6667	16.8	101403
14	15.4667	NaN	NaN	15.7333	NaN	NaN	63.6	1014025	1014026	1014023	1020	822	998.5	823.5	5	17.7333	18.6667	1014019
14	15.3333	NaN	NaN	14.9333	NaN	NaN	79.0667	1014028	1014029	1014025	957.5	928	929	914.5	6	15.4667	17.7333	1014023
14	14.8	NaN	NaN	14.8	NaN	NaN	94.4	1014031	1014032	1014028	980.5	787.5	966.5	788	7	15.3333	15.4667	1014025
14	15.3333	NaN	NaN	NaN	NaN	32.2667	109.2	1014034	1014035	1014031	783.5	923.5	764	911.5	8	14.8	15.3333	1014028
14	NaN	NaN	16.9333	NaN	NaN	16.9333	124.533	1014037	1014038	1014034	687.5	583	669.5	580.5	9	15.3333	14.8	1014031
14	14.8	NaN	NaN	14.5333	NaN	NaN	43.2	1014041	1014042	101406	796.5	947	789.5	925.5	4	16.5333	16.2667	101402
14	13.4667	NaN	NaN	14	NaN	NaN	58	1014044	1014045	1014041	841	873	810	869.5	5	14.8	16.5333	101406
14	17.3333	NaN	NaN	17.7333	NaN	NaN	71.4667	1014048	1014049	1014044	1332	1084	1325	1090	6	13.4667	14.8	1014041
14	16.6667	NaN	NaN	17.8667	NaN	NaN	88.8	1014051	1014052	1014048	1269	1269.5	1269	1287.5	7	17.3333	13.4667	1014044
14	16.4	NaN	NaN	NaN	NaN	36	105.467	1014055	1014054	1014051	946	1526	963.5	1526	8	16.6667	17.3333	1014048
14	NaN	NaN	19.6	NaN	NaN	19.6	121.867	1014057	1014058	1014055	540	1565.5	526.5	1572	9	16.4	16.6667	1014051
14	NaN	NaN	2.4	NaN	56.2667	NaN	62.1333	1014062	1014063	101409	1129	1064	1110	1084	5	16.9333	18.5333	101405
14	NaN	NaN	10.1333	NaN	NaN	4.26667	89.8667	1014068	1014069	1014012	1406.17	1710.83	1391.5	1712.17	6	28.4	16.2667	101408
14	17.2	NaN	NaN	18.5333	NaN	NaN	42.8	1014075	1014076	1014020	1311.5	839.833	1305.5	847.167	4	15.6	16.8	101403
14	15.8667	NaN	NaN	14	NaN	NaN	60	1014078	1014079	1014075	1269.5	719.5	1252.5	721	5	17.2	15.6	1014020
14	NaN	37.4667	NaN	16.9333	NaN	NaN	75.8667	1014081	1014082	1014078	1247	975.5	1252.5	955	6	15.8667	17.2	1014075
14	NaN	0.133333	NaN	NaN	0.133333	NaN	60	1014086	1014087	1014022	1406	1107	1406	1098	5	14.1333	18.6667	1014019
14	18.6667	NaN	NaN	18.2667	NaN	NaN	79.3333	1014089	1014090	1014026	1061.5	918.5	1049.5	931	6	15.7333	17.7333	1014023
14	14.2667	NaN	NaN	12.2667	NaN	NaN	98	1014092	1014093	1014089	956.5	1038.5	943	1026.5	7	18.6667	15.7333	1014026
14	14.8	NaN	NaN	NaN	NaN	29.2	112.267	1014095	1014096	1014092	1005	909	1001.5	889.5	8	14.2667	18.6667	1014089
14	NaN	NaN	14.4	NaN	NaN	14.4	127.067	1014098	1014099	1014095	805	1077.5	784.5	1076	9	14.8	14.2667	1014092
14	15.3333	NaN	NaN	16	NaN	NaN	94	10140102	10140103	1014029	1021	960	1005	943.5	7	14.9333	15.4667	1014025
14	14.5333	NaN	NaN	NaN	NaN	32.1333	109.333	10140105	10140106	10140102	900	1240.5	892.5	1251.5	8	15.3333	14.9333	1014029
14	NaN	NaN	17.6	NaN	NaN	17.6	123.867	10140108	10140109	10140105	876	1288	873.5	1311.5	9	14.5333	15.3333	10140102
14	15.3333	NaN	NaN	NaN	NaN	32.2667	109.2	10140112	10140113	1014032	1168	758	1163	776	8	14.8	15.3333	1014028
14	NaN	NaN	16.9333	NaN	NaN	16.9333	124.533	10140115	10140116	10140112	1064	992.5	1039.5	1001	9	15.3333	14.8	1014032
14	12.4	NaN	NaN	13.3333	NaN	NaN	57.7333	10140119	10140120	1014042	788.833	698.167	786.167	715.5	5	14.5333	16.5333	101406
14	18	NaN	NaN	15.8667	NaN	NaN	70.1333	10140121	10140122	10140119	747	778	747.5	799	6	12.4	14.5333	1014042
14	16.1333	NaN	NaN	16.8	NaN	NaN	88.1333	10140124	10140125	10140121	840.5	919	823.5	923.5	7	18	12.4	10140119
14	16.1333	NaN	NaN	16.1333	NaN	NaN	104.267	10140127	10140128	10140124	907.5	816.5	894	828	8	16.1333	18	10140121
14	17.0667	NaN	NaN	NaN	NaN	21.0667	120.4	10140130	10140131	10140127	994.5	779.5	989.5	792.5	9	16.1333	16.1333	10140124
14	NaN	NaN	4	NaN	NaN	4	137.467	10140133	10140134	10140130	986	705.5	967.5	720.5	10	17.0667	16.1333	10140127
14	18.5333	NaN	NaN	17.6	NaN	NaN	71.0667	10140137	10140138	10140120	882.5	720.5	877	703.5	6	13.3333	14.5333	1014042
14	15.0667	NaN	NaN	14	NaN	NaN	89.6	10140140	10140141	10140137	896.5	647	883	640.5	7	18.5333	13.3333	10140120
14	14.9333	NaN	NaN	12.6667	NaN	NaN	104.667	10140143	10140144	10140140	891.5	686.5	875	693.5	8	15.0667	18.5333	10140137
14	14.8	NaN	NaN	NaN	NaN	21.8667	119.6	10140146	10140147	10140143	733	750.5	730	731	9	14.9333	15.0667	10140140
14	NaN	NaN	7.06667	NaN	NaN	7.06667	134.4	10140149	10140150	10140146	759	807	737	813	10	14.8	14.9333	10140143
14	NaN	NaN	0.266667	NaN	NaN	0.266667	72	10140154	10140155	1014045	841	956	817.5	967	6	14	14.8	1014041
14	16.6667	NaN	NaN	14.9333	NaN	NaN	89.2	10140158	10140159	1014049	1400	1195	1375	1194.5	7	17.7333	13.4667	1014044
14	15.3333	NaN	NaN	NaN	NaN	35.6	105.867	10140161	10140162	10140158	1235.5	1247.5	1226	1265.5	8	16.6667	17.7333	1014049
14	18.4	NaN	NaN	NaN	NaN	20.2667	121.2	10140164	10140165	10140161	984	1317	974	1303	9	15.3333	16.6667	10140158
14	NaN	NaN	1.86667	NaN	NaN	1.86667	139.6	10140167	10140168	10140164	917.5	1481	897.5	1460	10	18.4	15.3333	10140161
14	NaN	NaN	34.8	NaN	NaN	34.8	106.667	10140172	10140173	1014052	1239.5	1315.5	1236.5	1336	8	17.8667	17.3333	1014048
14	14.9333	NaN	NaN	17.0667	NaN	NaN	61.3333	10140176	10140177	1014076	1406	786	1377.5	784	5	18.5333	15.6	1014020
14	NaN	NaN	0.266667	NaN	NaN	0.266667	76.2667	10140179	10140180	10140176	1776	731	1773	718.5	6	14.9333	18.5333	1014076
14	14.9333	NaN	NaN	17.0667	NaN	NaN	78.4	10140182	10140183	10140177	1292.5	979.5	1288	999	6	17.0667	18.5333	1014076
14	14.6667	NaN	NaN	14.4	NaN	NaN	93.3333	10140185	10140186	10140182	1316.5	949	1305	966.5	7	14.9333	17.0667	10140177
14	NaN	NaN	33.4667	NaN	NaN	33.4667	108	10140188	10140189	10140185	1298	918.5	1287.5	906.5	8	14.6667	14.9333	10140182
14	16	NaN	NaN	17.0667	NaN	NaN	95.4667	10140191	10140192	10140183	1009	958.5	1004	942.5	7	17.0667	17.0667	10140177
14	NaN	NaN	30	NaN	NaN	30	111.467	10140195	10140194	10140191	981	1186	1002	1178.5	8	16	17.0667	10140183
14	NaN	NaN	33.7333	NaN	NaN	33.7333	107.733	10140197	10140198	10140186	1109.5	1095.5	1100	1121	8	14.4	14.9333	10140182
14	NaN	NaN	28.9333	NaN	NaN	28.9333	112.533	10140200	10140201	10140192	971.5	910	950.5	905.5	8	17.0667	17.0667	10140183
14	15.7333	NaN	NaN	16.5333	NaN	NaN	74	10140203	10140204	1014079	1372.5	810.167	1361.17	820.167	6	14	17.2	1014075
14	16.4	NaN	NaN	18.5333	NaN	NaN	89.7333	10140206	10140207	10140203	1549.17	741.5	1537.83	755.5	7	15.7333	14	1014079
14	NaN	NaN	35.3333	NaN	NaN	35.3333	106.133	10140209	10140210	10140206	1354.5	749	1348	767	8	16.4	15.7333	10140203
14	NaN	NaN	33.2	NaN	NaN	33.2	108.267	10140212	10140213	10140207	1252	908	1246	878.5	8	18.5333	15.7333	10140203
14	13.6	NaN	NaN	12.2667	NaN	NaN	90.5333	10140215	10140216	10140204	1535	738	1529	754.5	7	16.5333	14	1014079
14	14.1333	NaN	NaN	13.0667	NaN	NaN	104.133	10140218	10140219	10140215	1523.83	555.833	1516.5	568.167	8	13.6	16.5333	10140204
14	NaN	NaN	23.2	NaN	NaN	23.2	118.267	10140221	10140222	10140218	1496.5	635.833	1484.17	647.833	9	14.1333	13.6	10140215
14	NaN	NaN	24.2667	NaN	NaN	24.2667	117.2	10140224	10140225	10140219	1592.5	755.5	1573.5	754.167	9	13.0667	13.6	10140215
14	14.6667	NaN	NaN	13.3333	NaN	NaN	102.8	10140228	10140227	10140216	1517.5	814.167	1533.83	826.833	8	12.2667	16.5333	10140204
14	NaN	NaN	24	NaN	NaN	24	117.467	10140230	10140231	10140228	1544.5	934.167	1534.17	923.833	9	14.6667	12.2667	10140216
14	NaN	NaN	25.3333	NaN	NaN	25.3333	116.133	10140233	10140232	10140227	1632.5	910.5	1638.5	897.167	9	13.3333	12.2667	10140216
14	NaN	4.53333	NaN	15.3333	NaN	NaN	92.8	10140235	10140236	1014082	1270.5	1195.17	1253.5	1183.83	7	16.9333	15.8667	1014078
14	NaN	NaN	33.3333	NaN	NaN	33.3333	108.133	10140239	10140240	10140236	1221.5	1053.5	1209.83	1037.17	8	15.3333	16.9333	1014082
14	13.2	NaN	NaN	11.2	NaN	NaN	97.6	10140242	10140243	1014090	1009.83	854.167	1010.5	833.833	7	18.2667	15.7333	1014026
14	NaN	NaN	30.6667	NaN	NaN	30.6667	110.8	10140245	10140246	10140242	1045.5	940.833	1028.17	945.167	8	13.2	18.2667	1014090
14	NaN	NaN	32.6667	NaN	NaN	32.6667	108.8	10140248	10140249	10140243	1109.5	707.833	1098.17	722.167	8	11.2	18.2667	1014090
14	NaN	NaN	31.2	NaN	NaN	31.2	110.267	10140251	10140252	1014093	829.167	1023.83	814.833	1035.83	8	12.2667	18.6667	1014089
14	NaN	NaN	31.4667	NaN	NaN	31.4667	110	10140254	10140255	10140103	986.5	713.833	976.833	698.833	8	16	14.9333	1014029
14	13.7333	NaN	NaN	14.8	NaN	NaN	86	10140257	10140258	10140122	792.833	767.833	781.167	757.5	7	15.8667	12.4	10140119
14	18.1333	NaN	NaN	14.9333	NaN	NaN	99.7333	10140260	10140261	10140257	844.833	876.833	837.167	891.5	8	13.7333	15.8667	10140122
14	NaN	NaN	23.6	NaN	NaN	23.6	117.867	10140263	10140264	10140260	927.5	1170.83	919.5	1190.83	9	18.1333	13.7333	10140257
14	NaN	NaN	26.8	NaN	NaN	26.8	114.667	10140266	10140267	10140261	975.833	764.5	946.167	774.833	9	14.9333	13.7333	10140257
14	15.2	NaN	NaN	16.5333	NaN	NaN	100.8	10140269	10140270	10140258	917.5	748.167	910.5	774.167	8	14.8	15.8667	10140122
14	NaN	NaN	25.4667	NaN	NaN	25.4667	116	10140272	10140273	10140269	848.833	890.5	849.5	912.833	9	15.2	14.8	10140258
14	NaN	NaN	24.1333	NaN	NaN	24.1333	117.333	10140275	10140276	10140270	1006.5	706.167	990.167	693.833	9	16.5333	14.8	10140258
14	12.9333	NaN	NaN	13.8667	NaN	NaN	104.933	10140278	10140279	10140125	603.833	988.5	582.167	984.167	8	16.8	18	10140121
14	NaN	NaN	23.6	NaN	NaN	23.6	117.867	10140281	10140282	10140278	659.5	945.5	640.167	947.167	9	12.9333	16.8	10140125
14	NaN	NaN	22.6667	NaN	NaN	22.6667	118.8	10140284	10140285	10140279	442.833	978.5	415.167	972.5	9	13.8667	16.8	10140125
14	NaN	NaN	21.0667	NaN	NaN	21.0667	120.4	10140287	10140288	10140128	892.5	850.167	879.167	870.5	9	16.1333	16.1333	10140124
14	14.5333	NaN	NaN	13.2	NaN	NaN	88.6667	10140290	10140291	10140138	1041.5	611.167	1037.17	625.167	7	17.6	13.3333	10140120
14	14.1333	NaN	NaN	14	NaN	NaN	103.2	10140293	10140294	10140290	994.167	632.833	988.833	653.5	8	14.5333	17.6	10140138
14	NaN	NaN	24.1333	NaN	NaN	24.1333	117.333	10140296	10140297	10140293	985.833	569.167	963.833	568.167	9	14.1333	14.5333	10140290
14	NaN	NaN	24.2667	NaN	NaN	24.2667	117.2	10140299	10140300	10140294	866.167	633.167	864.5	653.167	9	14	14.5333	10140290
14	13.2	NaN	NaN	14.5333	NaN	NaN	101.867	10140302	10140303	10140291	1028.17	545.5	1009.17	539.5	8	13.2	17.6	10140138
14	NaN	NaN	26.4	NaN	NaN	26.4	115.067	10140305	10140306	10140302	838.833	749.833	823.167	746.833	9	13.2	13.2	10140291
14	NaN	NaN	25.0667	NaN	NaN	25.0667	116.4	10140308	10140309	10140303	1111.83	435.167	1105.5	423.167	9	14.5333	13.2	10140291
14	11.6	NaN	NaN	14.4	NaN	NaN	103.6	10140323	10140324	10140141	1061.5	601.5	1049.17	611.5	8	14	18.5333	10140137
14	NaN	NaN	26.2667	NaN	NaN	26.2667	115.2	10140326	10140327	10140323	1029.17	491.167	1013.17	500.167	9	11.6	14	10140141
14	NaN	NaN	23.4667	NaN	NaN	23.4667	118	10140329	10140330	10140324	896.5	703.833	893.5	722.167	9	14.4	14	10140141
14	NaN	NaN	24.1333	NaN	NaN	24.1333	117.333	10140311	10140312	10140144	932.833	777.167	922.5	768.167	9	12.6667	15.0667	10140140
14	14.4	NaN	NaN	15.4667	NaN	NaN	104.133	10140314	10140315	10140159	1450.5	1409.5	1430.5	1409.5	8	14.9333	17.7333	1014049
14	NaN	NaN	22.9333	NaN	NaN	22.9333	118.533	10140317	10140318	10140314	1339.5	1510.5	1325.83	1523.17	9	14.4	14.9333	10140159
14	NaN	NaN	21.8667	NaN	NaN	21.8667	119.6	10140320	10140321	10140315	1371.5	1320.17	1355.5	1327.83	9	15.4667	14.9333	10140159
15	16.6667	NaN	NaN	12.6667	NaN	NaN	11.8667	101502	101503	101501	807.5	649.5	789.5	652.167	2	NaN	NaN	1015000
15	16.4	NaN	NaN	15.8667	NaN	NaN	28.5333	101504	101505	101502	616.167	480.833	612.167	494.167	3	16.6667	NaN	101501
15	14.9333	NaN	NaN	15.0667	NaN	NaN	44.9333	101507	101508	101504	649.167	378.167	624.5	379.5	4	16.4	16.6667	101502
15	17.4667	NaN	NaN	16.5333	NaN	NaN	59.8667	1015010	1015011	101507	902.167	234.833	895.5	248.167	5	14.9333	16.4	101504
15	16.5333	NaN	NaN	NaN	NaN	15.8667	77.3333	1015013	1015014	1015010	1340.17	228.167	1345.5	208.167	6	17.4667	14.9333	101507
15	14.6667	NaN	NaN	14.2667	NaN	NaN	93.8667	1015016	1015017	1015013	1410.83	196.167	1395.5	202.167	7	16.5333	17.4667	1015010
15	15.4667	NaN	NaN	NaN	NaN	32.9333	108.533	1015019	1015020	1015016	1448.5	164	1450.5	187.5	8	14.6667	16.5333	1015013
15	NaN	NaN	17.4667	NaN	NaN	17.4667	124	1015022	1015023	1015019	1615.5	96	1598.5	100.5	9	15.4667	14.6667	1015016
15	NaN	NaN	0.266667	NaN	NaN	0.266667	24.5333	1015025	1015026	101503	1218.67	724	1224	732	3	12.6667	NaN	101501
15	13.6	NaN	NaN	14.4	NaN	NaN	44.4	1015028	1015029	101505	1266.5	970.5	1257.83	976.5	4	15.8667	16.6667	101502
15	17.2	NaN	NaN	13.3333	NaN	NaN	58	1015031	1015032	1015028	1424.5	1078.83	1432.5	1067.17	5	13.6	15.8667	101505
15	17.0667	NaN	NaN	16.8	NaN	NaN	75.2	1015034	1015035	1015031	1502.17	1090.83	1490.17	1073.83	6	17.2	13.6	1015028
15	14.6667	NaN	NaN	14.1333	NaN	NaN	92.2667	1015037	1015038	1015034	1506.17	1225.17	1487.5	1240.5	7	17.0667	17.2	1015031
15	13.6	NaN	NaN	NaN	NaN	34.5333	106.933	1015040	1015041	1015037	1154.83	1038.83	1141.83	1043.83	8	14.6667	17.0667	1015034
15	18.9333	NaN	NaN	NaN	NaN	20.9333	120.533	1015043	1015044	1015040	1217.17	1201.5	1215.17	1218.17	9	13.6	14.6667	1015037
15	NaN	NaN	2	NaN	NaN	2	139.467	1015045	1015046	1015043	1140.83	1220.83	1127.5	1216.5	10	18.9333	13.6	1015040
15	17.6	NaN	NaN	15.2	NaN	NaN	60	1015050	1015051	101508	948.5	427.5	930.5	408.833	5	15.0667	16.4	101504
15	15.7333	NaN	NaN	15.4667	NaN	NaN	77.6	1015053	1015054	1015050	1029.5	303	1018	320	6	17.6	15.0667	101508
15	15.7333	NaN	NaN	15.4667	NaN	NaN	93.3333	1015056	1015057	1015053	1102.5	358.5	1083	353.5	7	15.7333	17.6	1015050
15	12.5333	NaN	NaN	NaN	NaN	32.4	109.067	1015059	1015060	1015056	907.5	525	891.5	532	8	15.7333	15.7333	1015053
15	NaN	NaN	19.8667	NaN	NaN	19.8667	121.6	1015062	1015063	1015059	825	234.5	816	249	9	12.5333	15.7333	1015056
15	14.2667	NaN	NaN	14.1333	NaN	NaN	58.8	1015067	1015068	1015029	1139	1053	1121.5	1037	5	14.4	15.8667	101505
15	17.7333	NaN	NaN	17.7333	NaN	NaN	73.0667	1015069	1015070	1015067	1282.5	925	1268.5	919	6	14.2667	14.4	1015029
15	14	NaN	NaN	14.8	NaN	NaN	90.8	1015072	1015073	1015069	1086	726	1069	717	7	17.7333	14.2667	1015067
15	14.6667	NaN	NaN	14.6667	NaN	NaN	104.8	1015075	1015076	1015072	924.5	1092.5	905	1083	8	14	17.7333	1015069
15	14.6667	NaN	NaN	NaN	NaN	22	119.467	1015078	1015079	1015075	721	874.5	719	892	9	14.6667	14	1015072
15	NaN	NaN	7.33333	NaN	NaN	7.33333	134.133	1015081	1015082	1015078	820	1053	808.5	1067.5	10	14.6667	14.6667	1015075
15	14.4	NaN	NaN	19.8667	NaN	NaN	75.2	1015085	1015086	1015051	1144.5	452	1128.5	451	6	15.2	15.0667	101508
15	12.1333	NaN	NaN	11.7333	NaN	NaN	89.6	1015088	1015089	1015085	988	685	974.5	704.5	7	14.4	15.2	1015051
15	12.9333	NaN	NaN	12.6667	NaN	NaN	101.733	1015091	1015092	1015088	997.5	593.5	979	577.5	8	12.1333	14.4	1015085
15	NaN	NaN	1.2	14.5333	NaN	NaN	114.667	1015094	1015095	1015091	1111	481.5	1095	475	9	12.9333	12.1333	1015088
15	NaN	NaN	12.2667	NaN	2.93333	NaN	129.2	1015098	1015099	1015095	909	732.5	903.5	717	10	14.5333	12.9333	1015091
15	16.9333	NaN	NaN	14.8	NaN	NaN	72.9333	10150102	10150103	1015068	1572.17	1389.5	1551.5	1394.83	6	14.1333	14.4	1015029
15	15.7333	NaN	NaN	14.5333	NaN	NaN	89.8667	10150105	10150106	10150102	1514.83	1399.5	1488.83	1392.17	7	16.9333	14.1333	1015068
15	NaN	8.13333	NaN	NaN	NaN	35.8667	105.6	10150108	10150109	10150105	1278.5	1164	1257.5	1169.5	8	15.7333	16.9333	10150102
15	NaN	NaN	12.2667	16.2667	NaN	NaN	76.4	10150112	10150113	1015011	905	112.5	891.5	105.5	6	16.5333	14.9333	101507
15	13.8667	NaN	NaN	NaN	NaN	33.3333	108.133	10150119	10150120	1015017	1391.5	220.5	1389	239.5	8	14.2667	16.5333	1015013
15	NaN	11.6	NaN	NaN	NaN	19.4667	122	10150122	10150123	10150119	1621	212	1606.5	212.5	9	13.8667	14.2667	1015017
15	16	NaN	NaN	15.6	NaN	NaN	71.3333	10150127	10150128	1015032	1200	818.5	1194.5	804.5	6	13.3333	13.6	1015028
15	16	NaN	NaN	15.6	NaN	NaN	87.3333	10150130	10150131	10150127	1146	904	1140.5	886.5	7	16	13.3333	1015032
15	14.9333	NaN	NaN	16.1333	NaN	NaN	103.333	10150133	10150134	10150130	1068.5	785	1044.5	788.5	8	16	16	10150127
15	17.7333	NaN	NaN	15.4667	NaN	NaN	95.0667	10150243	10150244	1015086	1341	368.5	1327.5	356.5	7	19.8667	15.2	1015051
15	NaN	NaN	28.6667	NaN	NaN	28.6667	112.8	10150246	10150247	10150243	1300	409	1281	418.5	8	17.7333	19.8667	1015086
15	NaN	NaN	30.9333	NaN	NaN	30.9333	110.533	10150249	10150250	10150244	1200.5	192	1199.5	205	8	15.4667	19.8667	1015086
15	14.5333	NaN	NaN	14.4	NaN	NaN	92	10150146	10150147	1015035	1377.5	929.833	1383.5	915.5	7	16.8	17.2	1015031
15	14.4	NaN	NaN	NaN	NaN	34.9333	106.533	10150149	10150150	10150146	1309.17	738.167	1303.5	717.5	8	14.5333	16.8	1015035
15	16.8	NaN	NaN	NaN	NaN	20.5333	120.933	10150152	10150153	10150149	1148.5	744.167	1137.5	725.167	9	14.4	14.5333	10150146
15	NaN	NaN	3.73333	NaN	NaN	3.73333	137.733	10150155	10150156	10150152	1129.83	681.5	1125.17	666.167	10	16.8	14.4	10150149
15	13.7333	NaN	NaN	14.2667	NaN	NaN	93.0667	10150160	10150161	1015054	909	275	900.5	292	7	15.4667	17.6	1015050
15	15.0667	NaN	NaN	NaN	NaN	34.6667	106.8	10150163	10150164	10150160	606.5	343	595.5	331.5	8	13.7333	15.4667	1015054
15	NaN	NaN	19.6	NaN	NaN	19.6	121.867	10150166	10150167	10150163	660	284.5	645	292.5	9	15.0667	13.7333	10150160
15	13.7333	NaN	NaN	14.9333	NaN	NaN	86.9333	10150171	10150172	10150128	1197.5	657	1186.5	691	7	15.6	13.3333	1015032
15	15.2	NaN	NaN	15.7333	NaN	NaN	100.667	10150174	10150175	10150171	1224	777.5	1207	783.5	8	13.7333	15.6	10150128
15	16.8	NaN	NaN	NaN	NaN	25.6	115.867	10150177	10150178	10150174	1011	1082.5	1000	1073	9	15.2	13.7333	10150171
15	NaN	NaN	8.8	NaN	NaN	8.8	132.667	10150180	10150181	10150177	753	1219.5	754	1240	10	16.8	15.2	10150174
15	13.6	NaN	NaN	14.2667	NaN	NaN	102.933	10150184	10150185	10150131	1224	1003	1200.5	1014.5	8	15.6	16	10150127
15	16.8	NaN	NaN	NaN	NaN	24.9333	116.533	10150186	10150187	10150184	1367.5	1054.5	1369.5	1074	9	13.6	15.6	10150131
15	NaN	NaN	8.13333	NaN	NaN	8.13333	133.333	10150189	10150190	10150186	1428.5	1083	1417	1071.5	10	16.8	13.6	10150184
15	13.8667	NaN	NaN	13.2	NaN	NaN	90.8	10150194	10150195	1015070	1155	800	1148	783	7	17.7333	14.2667	1015067
15	13.7333	NaN	NaN	14.1333	NaN	NaN	104.667	10150197	10150198	10150194	1051.5	872	1033.5	872.5	8	13.8667	17.7333	1015070
15	NaN	NaN	10.5333	NaN	NaN	23.0667	118.4	10150200	10150201	10150197	1081	719	1079	736	9	13.7333	13.8667	10150194
15	NaN	NaN	8.53333	NaN	NaN	35.0667	106.4	10150204	10150205	10150147	1495.5	683	1476.5	677.5	8	14.4	16.8	1015035
15	12.4	NaN	NaN	NaN	NaN	35.0667	106.4	10150208	10150209	1015038	1647.5	1358	1621.5	1364.5	8	14.1333	17.0667	1015034
15	14.9333	NaN	NaN	NaN	NaN	22.6667	118.8	10150211	10150212	10150208	1653	1323.5	1639	1326	9	12.4	14.1333	1015038
15	NaN	NaN	7.73333	NaN	NaN	7.73333	133.733	10150213	10150214	10150211	1689.5	1331.5	1670.5	1348	10	14.9333	12.4	10150208
15	16.5333	NaN	NaN	16.5333	NaN	NaN	87.7333	10150218	10150219	10150103	1620.5	1464	1622	1436.5	7	14.8	14.1333	1015068
15	NaN	NaN	0.266667	NaN	NaN	0.266667	104.267	10150221	10150222	10150218	1583.5	1598	1570.5	1588.5	8	16.5333	14.8	10150103
15	21.2	NaN	NaN	NaN	NaN	22	119.467	10150224	10150225	10150134	1006	719.5	991.5	701.5	9	16.1333	16	10150130
15	NaN	NaN	0.8	NaN	NaN	0.8	140.667	10150227	10150228	10150224	954	706	949	687	10	21.2	16.1333	10150134
15	13.7333	NaN	NaN	NaN	NaN	34.1333	107.333	10150232	10150233	10150161	1216.5	177.5	1198.5	191.5	8	14.2667	15.4667	1015054
15	NaN	NaN	2.26667	16.1333	NaN	NaN	121.067	10150235	10150236	10150232	1065.5	33	1045	35	9	13.7333	14.2667	10150161
15	NaN	NaN	4.26667	NaN	NaN	4.26667	137.2	10150238	10150239	10150236	981.5	84.5	971	72.5	10	16.1333	13.7333	10150232
15	NaN	NaN	32.6667	NaN	NaN	32.6667	108.8	10150252	10150253	1015057	873	274.5	854.5	280.5	8	15.4667	15.7333	1015053
15	NaN	NaN	35.8667	NaN	NaN	35.8667	105.6	10150255	10150256	1015073	1004.17	841.833	989.833	830.167	8	14.8	17.7333	1015069
15	NaN	NaN	22	NaN	NaN	22	119.467	10150261	10150262	1015076	1163.5	1079.17	1154.5	1058.83	9	14.6667	14	1015072
15	14.2667	NaN	NaN	15.2	NaN	NaN	101.333	10150264	10150265	1015089	738.5	975	720.5	974	8	11.7333	14.4	1015085
15	NaN	NaN	25.8667	NaN	NaN	25.8667	115.6	10150267	10150268	10150264	643	1186	633	1170.5	9	14.2667	11.7333	1015089
15	NaN	NaN	24.9333	NaN	NaN	24.9333	116.533	10150270	10150271	10150265	888.5	717.5	886	735.5	9	15.2	11.7333	1015089
15	NaN	NaN	27.0667	NaN	NaN	27.0667	114.4	10150273	10150274	1015092	786	650	773	664.5	9	12.6667	12.1333	1015088
15	15.6	NaN	NaN	NaN	NaN	9.2	104.4	10150276	10150277	10150106	1664.5	1626.5	1652	1620.5	8	14.5333	16.9333	10150102
15	NaN	NaN	21.4667	NaN	NaN	21.4667	120	10150279	10150280	10150276	1418.5	1604.5	1405	1598	9	15.6	14.5333	10150106
15	18.9333	NaN	NaN	NaN	NaN	15.2	92.6667	10150283	10150284	10150113	726.833	286.167	714.5	300.5	7	16.2667	16.5333	1015011
15	NaN	NaN	29.8667	NaN	NaN	29.8667	111.6	10150286	10150287	10150283	755.5	406.5	742.5	433.5	8	18.9333	16.2667	10150113
15	14.4	NaN	NaN	14.6667	NaN	NaN	101.867	10150291	10150292	10150172	1344.5	761	1320	769.5	8	14.9333	15.6	10150128
15	NaN	NaN	25.2	NaN	NaN	25.2	116.267	10150294	10150295	10150291	1328.83	837.167	1319.17	822.833	9	14.4	14.9333	10150172
15	NaN	NaN	24.9333	NaN	NaN	24.9333	116.533	10150297	10150298	10150292	1364.17	934.5	1354.83	947.167	9	14.6667	14.9333	10150172
15	NaN	NaN	23.2	NaN	NaN	23.2	118.267	10150136	10150137	10150133	826.5	792	834	779.5	9	14.9333	16	10150130
15	NaN	NaN	25.0667	NaN	NaN	25.0667	116.4	10150300	10150301	10150175	1058.83	663.5	1031.17	667.5	9	15.7333	13.7333	10150171
15	NaN	NaN	24.2667	NaN	NaN	24.2667	117.2	10150303	10150304	10150185	945.833	778.833	932.5	787.833	9	14.2667	15.6	10150131
15	14	NaN	NaN	13.6	NaN	NaN	104	10150306	10150307	10150195	1209.5	634.167	1198.5	623.5	8	13.2	17.7333	1015070
15	NaN	NaN	23.4667	NaN	NaN	23.4667	118	10150309	10150310	10150306	1000.17	549.167	996.167	564.167	9	14	13.2	10150195
15	NaN	NaN	23.8667	NaN	NaN	23.8667	117.6	10150312	10150313	10150307	1037.83	572.5	1026.83	582.5	9	13.6	13.2	10150195
15	NaN	NaN	22.6667	NaN	NaN	22.6667	118.8	10150259	10150258	10150198	956.833	876.5	975.833	888.5	9	14.1333	13.8667	10150194
15	NaN	NaN	10.1333	NaN	NaN	2.53333	104.267	10150315	10150316	10150219	1561	1580	1548.5	1599.5	8	16.5333	14.8	10150103
16	15.4667	NaN	NaN	13.3333	NaN	NaN	13.3333	101602	101603	101601	1127.5	918	1115.5	921.5	2	NaN	NaN	1016000
16	NaN	NaN	0.133333	NaN	NaN	0.133333	28.8	101604	101605	101602	1506	891	1502	891	3	15.4667	NaN	101601
16	NaN	NaN	0.133333	NaN	NaN	0.133333	26.6667	101606	101607	101603	1452	1119	1446	1130	3	13.3333	NaN	101601
17	20.8	NaN	NaN	68	NaN	NaN	24.9333	101702	101703	101701	541.333	1065.33	532	1069.33	2	NaN	NaN	1017000
17	NaN	NaN	0.266667	NaN	NaN	0.266667	45.7333	101705	101706	101702	830.833	1721.5	827.5	1747.5	3	20.8	NaN	101701
17	NaN	18	NaN	25.6	NaN	NaN	92.9333	101708	101709	101703	1001	825.5	985	806	3	68	NaN	101701
17	NaN	4.4	NaN	NaN	3.6	NaN	118.533	1017012	1017013	101709	787	1244.5	777.5	1262.5	4	25.6	68	101703
18	13.2	NaN	NaN	13.4667	NaN	NaN	14.4	101802	101803	101801	254	239	260	220	2	NaN	NaN	1018000
18	13.2	NaN	NaN	16.6667	NaN	NaN	27.6	101804	101805	101802	190	451	173	450	3	13.2	NaN	101801
18	NaN	30.9333	NaN	14	NaN	NaN	40.8	101807	101808	101804	1267	896	1259.5	902.5	4	13.2	13.2	101802
18	NaN	NaN	0.266667	NaN	NaN	0.266667	27.8667	1018011	1018012	101803	1233.33	833.333	1233.33	842.667	3	13.4667	NaN	101801
18	15.8667	NaN	NaN	13.7333	NaN	NaN	44.2667	1018014	1018015	101805	271.5	317.5	257.5	327.5	4	16.6667	13.2	101802
18	NaN	1.2	NaN	17.0667	NaN	NaN	60.1333	1018017	1018018	1018014	302.833	516.167	290.167	527.5	5	15.8667	16.6667	101805
18	18.2667	NaN	NaN	16.1333	NaN	NaN	77.2	10180212	10180213	1018018	352.167	660.833	340.167	672.167	6	17.0667	15.8667	1018014
18	NaN	14.5333	NaN	NaN	14.5333	NaN	95.4667	1018061	1018062	10180212	1037.5	894.833	1024.17	900.167	7	18.2667	17.0667	1018018
18	14.2667	NaN	NaN	14	NaN	NaN	54.8	1018037	1018038	101808	1361	667.5	1355.5	678.5	5	14	13.2	101804
18	NaN	NaN	3.73333	18.1333	NaN	NaN	69.0667	1018040	1018041	1018037	1765	874	1746	867	6	14.2667	14	101808
18	14.6667	NaN	NaN	13.7333	NaN	NaN	87.2	1018044	1018045	1018041	1609.83	939.167	1611.5	956.167	7	18.1333	14.2667	1018037
18	15.2	NaN	NaN	14.9333	NaN	NaN	101.867	1018047	1018048	1018044	1368.83	1028.17	1351.5	1035.5	8	14.6667	18.1333	1018041
18	24.1333	NaN	NaN	23.2	NaN	NaN	117.067	1018050	1018051	1018047	1229.17	963.5	1211.17	968.167	9	15.2	14.6667	1018044
18	NaN	NaN	0.266667	NaN	NaN	0.266667	141.2	1018052	1018053	1018050	1375.5	1154.5	1363.5	1164.17	10	24.1333	15.2	1018047
18	NaN	NaN	0.133333	NaN	NaN	0.133333	58	1018055	1018056	1018015	460	350.667	454.667	364	5	13.7333	16.6667	101805
18	NaN	9.33333	NaN	NaN	9.33333	NaN	100.933	1018069	1018070	1018045	1697.5	1231	1676	1232.5	8	13.7333	18.1333	1018041
18	16.4	NaN	NaN	15.6	NaN	NaN	116.8	1018074	1018075	1018048	1256.17	1058.17	1245.5	1072.5	9	14.9333	14.6667	1018044
18	NaN	NaN	8.26667	NaN	NaN	8.26667	133.2	1018077	1018078	1018074	1303.5	1033.83	1288.5	1036.5	10	16.4	14.9333	1018048
18	NaN	NaN	1.2	NaN	NaN	1.2	140.267	1018081	1018082	1018051	1204.17	977.5	1187.83	967.5	10	23.2	15.2	1018047
18	18.9333	NaN	NaN	14.1333	NaN	NaN	93.3333	1018058	1018059	10180213	462.5	522	458	514	7	16.1333	17.0667	1018018
18	17.2	NaN	NaN	18.8	NaN	NaN	112.267	1018086	1018087	1018058	459	616.5	440	619.5	8	18.9333	16.1333	10180213
18	NaN	2.53333	NaN	NaN	NaN	12	129.467	1018089	1018090	1018086	463.5	723.833	456.5	740.833	9	17.2	18.9333	1018058
18	15.4667	NaN	NaN	16.1333	NaN	NaN	107.467	1018094	1018095	1018059	373.833	414.833	369.5	431.5	8	14.1333	16.1333	10180213
18	NaN	NaN	18.5333	NaN	NaN	18.5333	122.933	1018097	1018098	1018094	192.833	254.167	192.5	273.167	9	15.4667	14.1333	1018059
18	15.7333	NaN	NaN	14.8	NaN	NaN	68.8	1018066	1018067	1018038	1285.5	705	1282.5	690.5	6	14	14	101808
18	14.2667	NaN	NaN	14.6667	NaN	NaN	84.5333	10180101	10180102	1018066	1381.5	418.167	1368.83	422.167	7	15.7333	14	1018038
18	14.9333	NaN	NaN	15.2	NaN	NaN	98.8	10180104	10180105	10180101	1286.83	257.167	1277.5	237.167	8	14.2667	15.7333	1018066
18	15.3333	NaN	NaN	16.1333	NaN	NaN	113.733	10180107	10180108	10180104	1081.83	303.167	1081.5	278.5	9	14.9333	14.2667	10180101
18	NaN	NaN	12.4	NaN	NaN	12.4	129.067	10180110	10180111	10180107	960.5	331.5	950.5	315.833	10	15.3333	14.9333	10180104
18	14.8	NaN	NaN	13.4667	NaN	NaN	83.6	10180115	10180116	1018067	998	528.5	983	526	7	14.8	14	1018038
18	15.3333	NaN	NaN	14.9333	NaN	NaN	98.4	10180118	10180119	10180115	1142.83	396.5	1120.17	386.833	8	14.8	14.8	1018067
18	19.0667	NaN	NaN	18.9333	NaN	NaN	113.733	10180121	10180122	10180118	1112.83	329.833	1096.83	329.5	9	15.3333	14.8	10180115
18	NaN	NaN	8.66667	NaN	NaN	8.66667	132.8	10180124	10180125	10180121	908.5	181.833	891.167	191.167	10	19.0667	15.3333	10180118
18	NaN	NaN	9.06667	NaN	NaN	9.06667	132.4	10180128	10180129	1018075	1209.83	1168.17	1195.5	1157.5	10	15.6	14.9333	1018048
18	NaN	4.93333	NaN	NaN	NaN	10.4	131.067	10180132	10180133	1018087	437.5	870.833	423.5	868.5	9	18.8	18.9333	1018058
18	NaN	NaN	17.8667	NaN	NaN	17.8667	123.6	10180137	10180138	1018095	580.5	363.833	572.833	377.167	9	16.1333	14.1333	1018059
18	13.7333	NaN	NaN	14.1333	NaN	NaN	99.2	10180143	10180144	10180102	1416.5	498	1410	517	8	14.6667	15.7333	1018066
18	16.2667	NaN	NaN	15.3333	NaN	NaN	114	10180149	10180150	10180105	1179.83	112.833	1176.5	133.5	9	15.2	14.2667	10180101
18	NaN	NaN	1.86667	NaN	NaN	1.86667	130.267	10180151	10180152	10180149	1330.17	316.5	1321.5	300.167	10	16.2667	15.2	10180105
18	NaN	NaN	11.6	NaN	NaN	11.6	129.867	10180155	10180156	10180108	958.167	102.833	943.167	105.167	10	16.1333	14.9333	10180104
18	16	NaN	NaN	NaN	7.73333	NaN	97.0667	10180160	10180161	10180116	750	322.5	742.5	312.5	8	13.4667	14.8	1018067
18	15.2	NaN	NaN	17.3333	NaN	NaN	113.067	10180163	10180164	10180160	955.5	272.5	945	267.5	9	16	13.4667	10180116
18	NaN	NaN	13.2	NaN	NaN	13.2	128.267	10180166	10180167	10180163	823	375	795	367	10	15.2	16	10180160
18	NaN	14.9333	NaN	18.1333	NaN	NaN	113.333	10180170	10180171	10180119	1217.5	366.5	1203	353	9	14.9333	14.8	10180115
18	NaN	NaN	8.8	NaN	NaN	8.8	132.667	10180175	10180176	10180122	1023.5	477.5	1011	475	10	18.9333	15.3333	10180118
18	16	NaN	NaN	15.2	NaN	NaN	113.333	10180180	10180181	10180144	1124.5	408.5	1120	427.5	9	14.1333	14.6667	10180102
18	NaN	NaN	12.1333	NaN	NaN	12.1333	129.333	10180183	10180184	10180180	1105	570.5	1090.5	563	10	16	14.1333	10180144
18	15.4667	NaN	NaN	15.0667	NaN	NaN	112.933	10180146	10180147	10180143	1294.5	694	1294	712.5	9	13.7333	14.6667	10180102
18	NaN	NaN	13.0667	NaN	NaN	13.0667	128.4	10180187	10180188	10180146	1588.83	767.167	1578.83	757.5	10	15.4667	13.7333	10180143
18	NaN	NaN	13.4667	NaN	NaN	13.4667	128	10180191	10180192	10180147	1379.83	710.833	1372.83	702.167	10	15.0667	13.7333	10180143
18	NaN	NaN	12.1333	NaN	NaN	12.1333	129.333	10180195	10180196	10180150	1352	409.25	1342.25	400.75	10	15.3333	15.2	10180105
18	NaN	NaN	11.0667	NaN	NaN	11.0667	130.4	10180201	10180202	10180164	909.5	47.5	896.5	43.5	10	17.3333	16	10180160
18	NaN	NaN	10	NaN	NaN	10	131.467	10180205	10180206	10180171	1283.5	380.167	1270.17	372.833	10	18.1333	14.9333	10180119
18	NaN	NaN	12.9333	NaN	NaN	12.9333	128.533	10180209	10180210	10180181	980.167	495.5	971.167	481.5	10	15.2	14.1333	10180144
19	15.0667	NaN	NaN	NaN	NaN	13.3333	32.2667	101908	101909	1019010	238.5	456.167	219.167	443.833	2	NaN	NaN	1019000
19	15.0667	NaN	NaN	NaN	NaN	7.73333	47.3333	101906	101907	101908	108.5	441.167	93.167	446.167	3	15.0667	NaN	1019010
19	16.9333	NaN	NaN	15.8667	NaN	NaN	62.4	101904	101905	101906	510.833	232.5	503.167	252.833	4	15.0667	15.0667	101908
19	12.9333	NaN	NaN	14.8	NaN	NaN	79.3333	101902	101903	101904	500.75	616.5	494.75	624	5	16.9333	15.0667	101906
19	13.2	NaN	NaN	14.4	NaN	NaN	92.2667	1019011	1019012	101902	443.5	349.5	423	343	6	12.9333	16.9333	101904
19	12.4	NaN	NaN	13.7333	NaN	NaN	105.467	1019014	1019015	1019011	415.5	446	411	430	7	13.2	12.9333	101902
19	17.3333	NaN	NaN	16.9333	NaN	NaN	117.867	1019017	1019018	1019014	506	693	487	703.5	8	12.4	13.2	1019011
19	NaN	NaN	6.26667	NaN	NaN	6.26667	135.2	1019022	1019023	1019017	612.5	664	594.5	670	9	17.3333	12.4	1019014
19	NaN	NaN	6.66667	NaN	NaN	6.66667	134.8	1019025	1019026	1019018	486	632	477	649	9	16.9333	12.4	1019014
19	16.1333	NaN	NaN	16.8	NaN	NaN	106.667	1019036	1019037	1019012	469.833	491.167	467.833	515.167	7	14.4	12.9333	101902
19	NaN	15.6	NaN	NaN	NaN	18.6667	122.8	1019030	1019031	1019036	324.833	666.167	322.833	649.5	8	16.1333	14.4	1019012
19	NaN	NaN	18	NaN	NaN	18	123.467	1019045	1019046	1019037	535	563.5	536	583	8	16.8	14.4	1019012
19	NaN	NaN	22.2667	NaN	21.3333	NaN	119.2	1019038	1019039	1019015	459.833	613.167	447.5	621.167	8	13.7333	13.2	1019011
19	13.8667	NaN	NaN	13.6	NaN	NaN	94.1333	1019050	1019051	101903	207.5	699.5	202	697.5	6	14.8	16.9333	101904
19	14.9333	NaN	NaN	13.3333	NaN	NaN	108	1019053	1019054	1019050	441	852	431	865	7	13.8667	14.8	101903
19	NaN	NaN	18.5333	NaN	NaN	18.5333	122.933	1019056	1019057	1019053	551.5	799	539.5	813	8	14.9333	13.8667	1019050
19	NaN	NaN	20.1333	NaN	NaN	20.1333	121.333	1019061	1019062	1019054	403.5	913.167	386.167	916.5	8	13.3333	13.8667	1019050
19	13.3333	NaN	NaN	13.8667	NaN	NaN	107.733	1019066	1019067	1019051	334.167	1068.17	314.833	1051.5	7	13.6	14.8	101903
19	NaN	NaN	20.4	NaN	NaN	20.4	121.067	1019069	1019070	1019066	382.833	962.167	377.5	948.833	8	13.3333	13.6	1019051
19	18.5333	NaN	NaN	18.9333	NaN	NaN	121.6	1019074	1019075	1019067	178.833	948.167	156.833	947.5	8	13.8667	13.6	1019051
19	NaN	NaN	1.33333	NaN	NaN	1.33333	140.133	1019076	1019077	1019074	89.5	1022.5	80.167	1039.83	9	18.5333	13.8667	1019067
19	NaN	NaN	0.933333	NaN	NaN	0.933333	140.533	1019078	1019079	1019075	62.167	1039.83	40.167	1013.83	9	18.9333	13.8667	1019067
19	14.8	NaN	NaN	14.8	NaN	NaN	78.2667	1019085	1019086	101905	589.5	514.167	568.833	514.833	5	15.8667	15.0667	101906
19	14.6667	NaN	NaN	15.7333	NaN	NaN	93.0667	1019088	1019089	1019085	1432.17	847.5	1413.5	837.5	6	14.8	15.8667	101905
19	14.2667	NaN	NaN	NaN	NaN	0.4	107.733	1019091	1019092	1019088	1378.83	964.5	1376.17	955.833	7	14.6667	14.8	1019085
19	NaN	NaN	19.4667	NaN	NaN	-96.5333	122	1019094	1019095	1019091	1460.83	854.833	1450.5	842.833	8	14.2667	14.6667	1019088
19	14	NaN	NaN	16.4	NaN	NaN	93.0667	1019098	1019099	1019086	1271	765	1266	757.5	6	14.8	15.8667	101905
19	NaN	NaN	7.73333	NaN	NaN	8.4	107.067	10190100	10190101	1019098	1486.83	952.167	1471.5	958.167	7	14	14.8	1019086
19	15.4667	NaN	NaN	15.0667	NaN	NaN	108.8	10190105	10190106	1019089	1268.5	984.167	1252.5	972.167	7	15.7333	14.8	1019085
19	NaN	NaN	17.2	NaN	NaN	17.2	124.267	10190108	10190109	10190105	1187.5	1009.5	1191	1025.5	8	15.4667	15.7333	1019089
19	NaN	NaN	17.6	NaN	NaN	17.6	123.867	10190113	10190114	10190106	1289.25	1143.5	1276.75	1134.25	8	15.0667	15.7333	1019089
19	14.1333	NaN	NaN	13.2	NaN	NaN	109.467	10190119	10190120	1019099	1152.5	817.5	1140.5	810.5	7	16.4	14.8	1019086
19	NaN	NaN	18.8	NaN	NaN	18.8	122.667	10190122	10190123	10190120	1304.83	937.167	1288.17	934.167	8	13.2	16.4	1019099
19	NaN	NaN	17.8667	NaN	NaN	17.8667	123.6	10190127	10190128	10190119	1054.17	887.5	1042.5	872.167	8	14.1333	16.4	1019099
20	21.8667	NaN	NaN	16	NaN	NaN	16.4	102004	102005	102003	1250	1080	1248	1052	2	NaN	NaN	1020000
20	NaN	NaN	0.266667	NaN	NaN	0.266667	32.4	102007	102008	102005	1480	1336	1456	1330	3	16	NaN	102003
20	20.2667	NaN	NaN	17.6	NaN	NaN	38.2667	102001	102002	102004	1251.17	940.167	1223.17	949.5	3	21.8667	NaN	102003
20	13.8667	NaN	NaN	13.7333	NaN	NaN	58.5333	1020011	1020012	102001	1365.17	604.833	1359.83	583.5	4	20.2667	21.8667	102004
20	16.8	NaN	NaN	15.4667	NaN	NaN	72.4	1020013	1020014	1020011	1378.17	568.833	1360.83	576.167	5	13.8667	20.2667	102001
20	18.5333	NaN	NaN	15.2	NaN	NaN	89.2	1020016	1020017	1020013	1456.17	568.167	1442.17	562.167	6	16.8	13.8667	1020011
20	15.6	NaN	NaN	18.6667	NaN	NaN	107.733	1020020	1020021	1020016	1257	634.5	1255	657.5	7	18.5333	16.8	1020013
20	NaN	14.4	NaN	NaN	NaN	1.33333	123.333	1020023	1020024	1020020	1202	602.5	1193	589.5	8	15.6	18.5333	1020016
20	NaN	11.7333	NaN	NaN	NaN	15.0667	126.4	1020028	1020029	1020021	905.5	753	902.5	774.5	8	18.6667	18.5333	1020016
20	14.5333	NaN	NaN	13.8667	NaN	NaN	55.8667	1020033	1020034	102002	1145.5	1003.83	1132.17	1003.83	4	17.6	21.8667	102004
20	16.2667	NaN	NaN	15.7333	NaN	NaN	70.4	1020036	1020037	1020033	1050.5	926.5	1046	901	5	14.5333	17.6	102002
20	13.3333	NaN	NaN	13.4667	NaN	NaN	86.6667	1020039	1020040	1020036	1102	1006.5	1075	1007.5	6	16.2667	14.5333	1020033
20	16	NaN	NaN	14	NaN	NaN	100	1020042	1020043	1020039	1086.5	1007	1089.5	993.5	7	13.3333	16.2667	1020036
20	16.2667	NaN	NaN	17.0667	NaN	NaN	116	1020045	1020046	1020042	1148	965	1140	946	8	16	13.3333	1020039
20	NaN	NaN	9.2	NaN	NaN	9.2	132.267	1020048	1020049	1020045	1105.83	899.167	1100.17	886.167	9	16.2667	16	1020042
20	13.8667	NaN	NaN	17.4667	NaN	NaN	69.7333	1020053	1020054	1020034	1566	1131	1550	1120.33	5	13.8667	17.6	102002
20	19.8667	NaN	NaN	15.0667	NaN	NaN	83.6	1020056	1020057	1020053	1516.5	1278.5	1504.5	1260	6	13.8667	13.8667	1020034
20	12.1333	NaN	NaN	11.7333	NaN	NaN	103.467	1020059	1020060	1020056	1347	1034	1349.5	1049.5	7	19.8667	13.8667	1020053
20	NaN	NaN	18.2667	NaN	NaN	25.8667	115.6	1020062	1020063	1020059	1525	1046	1519.5	1060	8	12.1333	19.8667	1020056
20	12.4	NaN	NaN	12	NaN	NaN	87.2	1020066	1020067	1020054	1490.5	1022	1488.5	1038.5	6	17.4667	13.8667	1020034
20	14.6667	NaN	NaN	14.8	NaN	NaN	99.6	1020069	1020070	1020066	1419	1221	1401	1233.5	7	12.4	17.4667	1020054
20	15.7333	NaN	NaN	NaN	NaN	27.2	114.267	1020072	1020073	1020069	1080	1065.5	1071.5	1077.5	8	14.6667	12.4	1020066
20	NaN	NaN	11.4667	NaN	NaN	11.4667	130	1020075	1020076	1020072	1055.5	1278.5	1047	1261	9	15.7333	14.6667	1020069
20	13.8667	NaN	NaN	14.8	NaN	NaN	86.1333	1020080	1020081	1020037	1185.5	1016.5	1165.5	1010	6	15.7333	14.5333	1020033
20	14.9333	NaN	NaN	14.2667	NaN	NaN	100	1020083	1020084	1020080	1062	952.5	1056	938.5	7	13.8667	15.7333	1020037
20	15.2	NaN	NaN	NaN	NaN	26.5333	114.933	1020086	1020087	1020083	846	814	843	831.5	8	14.9333	13.8667	1020080
20	NaN	NaN	11.3333	NaN	NaN	11.3333	130.133	1020088	1020089	1020086	737.5	790.5	719	787.5	9	15.2	14.9333	1020083
20	14.2667	NaN	NaN	14.6667	NaN	NaN	99.2	1020091	1020092	1020067	1325	893.5	1304.5	882.5	7	12	17.4667	1020054
20	NaN	18.1333	NaN	NaN	NaN	28	113.467	1020094	1020095	1020091	1300.5	965.5	1288.5	944	8	14.2667	12	1020067
20	14.4	NaN	NaN	13.8667	NaN	NaN	98.6667	1020098	1020099	1020057	1293.83	1360.17	1271.83	1372.17	7	15.0667	13.8667	1020053
20	12.2667	NaN	NaN	NaN	NaN	28.4	113.067	10200101	10200102	1020098	1015	1486.5	1002	1472.5	8	14.4	15.0667	1020057
20	NaN	NaN	16.1333	NaN	NaN	16.1333	125.333	10200104	10200105	10200101	676.5	1307	664	1292	9	12.2667	14.4	1020098
20	13.4667	NaN	NaN	15.4667	NaN	NaN	100.933	10200108	10200109	1020081	986.5	1102.5	969	1101	7	14.8	15.7333	1020037
20	17.2	NaN	NaN	15.4667	NaN	NaN	114.4	10200111	10200112	10200108	1033.5	1224	1020.5	1210	8	13.4667	14.8	1020081
20	NaN	NaN	9.86667	NaN	NaN	9.86667	131.6	10200114	10200115	10200111	890.5	1389	878.5	1374.5	9	17.2	13.4667	10200108
20	13.6	NaN	NaN	13.8667	NaN	NaN	100.133	10200118	10200119	1020040	1221.17	1142.5	1204.5	1149.83	7	13.4667	16.2667	1020036
20	15.3333	NaN	NaN	NaN	NaN	27.7333	113.733	10200121	10200122	10200118	1076.17	1256.83	1072.17	1242.17	8	13.6	13.4667	1020040
20	NaN	NaN	12.4	NaN	NaN	12.4	129.067	10200124	10200125	10200121	828.5	1243	814.5	1232	9	15.3333	13.6	10200118
20	14.8	NaN	NaN	15.6	NaN	NaN	114	10200128	10200129	10200119	1308.5	1097	1285.5	1095.5	8	13.8667	13.4667	1020040
20	NaN	NaN	12.6667	NaN	NaN	12.6667	128.8	10200131	10200132	10200128	1269	1092	1262.5	1113	9	14.8	13.8667	10200119
20	18.2667	NaN	NaN	NaN	NaN	27.4667	114	10200135	10200136	1020043	1175	945	1159.5	952	8	14	13.3333	1020039
20	NaN	NaN	9.2	NaN	NaN	9.2	132.267	10200138	10200139	10200135	927.5	967.5	921.833	988.167	9	18.2667	14	1020043
20	NaN	NaN	25.0667	18.6667	NaN	NaN	116.4	10200143	10200144	10200109	1030	1214	1021	1198.5	8	15.4667	14.8	1020081
20	15.2	NaN	NaN	13.8667	NaN	NaN	114.267	10200147	10200148	1020084	1017.5	1135	1015	1119	8	14.2667	13.8667	1020080
20	NaN	NaN	12	NaN	NaN	12	129.467	10200150	10200151	10200147	915	1142	902	1133.5	9	15.2	14.2667	1020084
20	15.7333	NaN	NaN	14.8	NaN	NaN	113.867	10200154	10200155	1020092	1265.5	988.5	1254	999	8	14.6667	12	1020067
20	NaN	NaN	11.8667	NaN	NaN	11.8667	129.6	10200157	10200158	10200154	1077	1028.5	1071	1046.5	9	15.7333	14.6667	1020092
20	16.2667	NaN	NaN	15.2	NaN	NaN	115.2	10200162	10200163	1020060	1206.5	1261.17	1187.17	1251.83	8	11.7333	19.8667	1020056
20	NaN	NaN	10	NaN	NaN	10	131.467	10200165	10200166	10200162	958.833	1312.83	937.5	1308.5	9	16.2667	11.7333	1020060
20	NaN	NaN	8.4	NaN	NaN	8.4	133.067	10200169	10200170	1020046	1154.17	1020.17	1154.5	1004.5	9	17.0667	16	1020042
20	NaN	NaN	11.0667	NaN	NaN	11.0667	130.4	10200174	10200175	10200163	923.5	1196.5	924.167	1215.17	9	15.2	11.7333	1020060
20	NaN	11.4667	NaN	NaN	NaN	12.8	128.667	10200179	10200180	10200155	1219.5	896.167	1212.17	879.5	9	14.8	14.6667	1020092
20	17.6	NaN	NaN	19.7333	NaN	NaN	112.533	10200184	10200185	1020099	1365.5	1467.5	1355	1496.5	8	13.8667	15.0667	1020057
20	NaN	NaN	11.3333	NaN	NaN	11.3333	130.133	10200187	10200188	10200184	1128	1593.5	1117.5	1612.5	9	17.6	13.8667	1020099
20	NaN	NaN	9.2	NaN	NaN	9.2	132.267	10200192	10200193	10200185	1328	1629.5	1320.5	1639	9	19.7333	13.8667	1020099
20	14.8	NaN	NaN	16.1333	NaN	NaN	114.4	10200197	10200198	1020070	1190	1412.5	1191.5	1433.5	8	14.8	12.4	1020066
20	NaN	NaN	12.2667	NaN	NaN	12.2667	129.2	10200200	10200201	10200197	1267.5	1596.5	1257.5	1574.5	9	14.8	14.8	1020070
20	NaN	NaN	0.266667	NaN	NaN	0.266667	72.2667	10200204	10200205	1020012	1460	588	1450	606	5	13.7333	20.2667	102001
20	13.3333	NaN	NaN	14	NaN	NaN	87.8667	10200207	10200208	1020014	1173.5	530.833	1168.83	513.5	6	15.4667	13.8667	1020011
20	13.3333	NaN	NaN	14.5333	NaN	NaN	101.2	10200211	10200212	10200207	1153.17	749.5	1141.17	741.5	7	13.3333	15.4667	1020014
20	18.6667	NaN	NaN	17.2	NaN	NaN	114.533	10200214	10200215	10200211	1105.5	692	1096	681.5	8	13.3333	13.3333	10200207
20	NaN	NaN	8.26667	NaN	NaN	8.26667	133.2	10200218	10200219	10200214	1048.5	594.5	1037.5	608	9	18.6667	13.3333	10200211
20	14.8	NaN	NaN	14.8	NaN	NaN	101.867	10200222	10200223	10200208	957	381	940	375.5	7	14	15.4667	1020014
20	NaN	NaN	10.8	18.1333	NaN	NaN	116.667	10200225	10200226	10200222	1146	159.5	1118.5	165.5	8	14.8	14	10200208
20	15.4667	NaN	NaN	13.8667	NaN	NaN	104.4	10200229	10200230	1020017	1431	533	1411	531.5	7	15.2	16.8	1020013
20	NaN	NaN	21.6	17.7333	NaN	NaN	119.867	10200232	10200233	10200229	1184	588	1175.5	612	8	15.4667	15.2	1020017
20	NaN	8.66667	NaN	16.4	NaN	NaN	115.733	10200236	10200237	10200212	1296.5	785	1284	793.5	8	14.5333	13.3333	10200207
20	20.6667	NaN	NaN	19.2	NaN	NaN	116.667	10200240	10200241	10200223	1091.5	597.5	1071.5	594.167	8	14.8	14	10200208
20	NaN	NaN	4.13333	NaN	NaN	4.13333	137.333	10200243	10200244	10200240	1045.5	366.5	1025	358	9	20.6667	14.8	10200223
20	18.2667	NaN	NaN	18.4	NaN	NaN	118.267	10200248	10200249	10200230	1491	387	1480.5	375	8	13.8667	15.2	1020017
20	NaN	NaN	4.93333	NaN	NaN	4.93333	136.533	10200251	10200252	10200248	1386.5	322	1373.5	315	9	18.2667	13.8667	10200230
20	NaN	NaN	4.8	NaN	NaN	4.8	136.667	10200256	10200257	10200249	1520.5	380.5	1518.5	400	9	18.4	13.8667	10200230
20	NaN	NaN	5.6	NaN	NaN	5.6	135.867	10200261	10200262	10200241	1206.5	568.5	1195.83	582.167	9	19.2	14.8	10200223
20	NaN	NaN	9.33333	NaN	NaN	9.33333	132.133	10200267	10200266	10200237	1344	817.5	1356.5	817	9	16.4	14.5333	10200212
20	NaN	1.33333	NaN	NaN	1.46667	NaN	137.6	10200270	10200271	10200233	1221	620.5	1209	637.5	9	17.7333	15.4667	10200229
20	NaN	NaN	0.266667	NaN	NaN	6.66667	134.8	10200275	10200276	10200226	822.5	6	815	2.5	9	18.1333	14.8	10200222
20	NaN	NaN	9.73333	NaN	NaN	9.73333	131.733	10200279	10200280	10200215	873.5	895	867	879.5	9	17.2	13.3333	10200211
20	NaN	NaN	10.9333	NaN	NaN	10.9333	130.533	10200283	10200284	10200198	921	1546	912.5	1528.5	9	16.1333	14.8	1020070
20	NaN	NaN	1.06667	NaN	NaN	1.06667	128.133	10200287	10200288	10200148	752	1142	740	1132	9	13.8667	14.2667	1020084
20	NaN	NaN	6.4	NaN	NaN	6.4	135.067	10200290	10200291	10200144	939.5	1175	935	1159	9	18.6667	15.4667	10200109
20	NaN	NaN	11.6	NaN	NaN	11.6	129.867	10200295	10200296	10200112	927	1228	918.5	1248.5	9	15.4667	13.4667	10200108
20	NaN	NaN	1.33333	NaN	NaN	1.33333	129.6	10200300	10200301	10200129	1289	1139.5	1278	1122	9	15.6	13.8667	10200119
21	17.7333	NaN	NaN	16.1333	NaN	NaN	23.0667	102102	102103	102101	667	496.5	661.5	488	2	NaN	NaN	1021000
21	17.7333	NaN	NaN	16	NaN	NaN	40.8	102105	102106	102102	1698	822.5	1683.5	820.5	3	17.7333	NaN	102101
21	13.0667	NaN	NaN	14.1333	NaN	NaN	58.5333	102108	102109	102105	1765.5	1240.5	1752	1214	4	17.7333	17.7333	102102
21	NaN	NaN	0.266667	NaN	NaN	0.266667	71.6	1021010	1021011	102108	1626.5	1364.5	1612.5	1371	5	13.0667	17.7333	102105
21	13.7333	NaN	NaN	12.1333	NaN	NaN	39.2	1021013	1021014	102103	933.167	400.167	915.167	402.167	3	16.1333	NaN	102101
21	17.2	NaN	NaN	22.4	NaN	NaN	52.9333	1021016	1021017	1021013	1312	705.5	1288	708.5	4	13.7333	16.1333	102103
21	NaN	NaN	0.266667	NaN	NaN	0.266667	56.8	1021022	1021023	102106	1481.5	1014.5	1464	1010	4	16	17.7333	102102
21	NaN	NaN	2.8	NaN	NaN	2.8	72.6667	1021024	1021025	102109	1744	1432.5	1734.5	1413	5	14.1333	17.7333	102105
21	NaN	NaN	0.266667	NaN	NaN	-13.0667	51.3333	1021028	1021029	1021014	1443.33	666.333	1439.33	654.333	4	12.1333	16.1333	102103
21	14.5333	NaN	NaN	13.8667	NaN	NaN	75.3333	1021031	1021032	1021017	1235	602	1213	600.5	5	22.4	13.7333	1021013
21	13.4667	NaN	NaN	14.8	NaN	NaN	89.8667	1021034	1021035	1021031	1451.5	629	1426	632.5	6	14.5333	22.4	1021017
21	14.4	NaN	NaN	13.0667	NaN	NaN	103.333	1021037	1021038	1021034	1514	651.5	1491.5	665.5	7	13.4667	14.5333	1021031
21	20.1333	NaN	NaN	18.4	NaN	NaN	117.733	1021040	1021041	1021037	1152	430	1150.5	441.5	8	14.4	13.4667	1021034
21	NaN	NaN	3.6	NaN	NaN	3.6	137.867	1021044	1021043	1021040	1101	343	1118.5	335.5	9	20.1333	14.4	1021037
21	34.4	NaN	NaN	13.7333	NaN	NaN	89.2	1021048	1021049	1021032	1434.5	634	1435	621	6	13.8667	22.4	1021017
21	NaN	NaN	0.4	NaN	NaN	0.4	123.6	1021052	1021053	1021048	1091.5	657.5	1087	669.5	7	34.4	13.8667	1021032
21	25.8667	NaN	NaN	16.6667	NaN	NaN	70.1333	1021019	1021020	1021016	1196.5	638.5	1199.5	661	5	17.2	13.7333	1021013
21	NaN	NaN	45.4667	NaN	24.1333	NaN	96	1021054	1021055	1021019	1129	475	1124	457	6	25.8667	17.2	1021016
21	NaN	NaN	54.6667	NaN	NaN	54.6667	86.8	1021057	1021058	1021020	1362.5	603.5	1345.5	607.5	6	16.6667	17.2	1021016
21	13.8667	NaN	NaN	NaN	NaN	0.8	104.667	1021061	1021062	1021035	1656.5	567.167	1655.17	548.5	7	14.8	14.5333	1021031
21	18.8	NaN	NaN	14.5333	NaN	NaN	118.533	1021064	1021065	1021061	1623.17	795.167	1618.5	805.167	8	13.8667	14.8	1021035
21	NaN	NaN	4.13333	NaN	NaN	4.13333	137.333	1021066	1021067	1021064	1613.5	799	1601	791.5	9	18.8	13.8667	1021061
21	NaN	37.8667	NaN	NaN	34.6667	NaN	102.933	1021071	1021072	1021049	1473.5	694.5	1467.5	678.5	7	13.7333	13.8667	1021032
21	21.4667	NaN	NaN	19.7333	NaN	NaN	116.4	1021077	1021078	1021038	1331.17	421.833	1324.83	440.5	8	13.0667	13.4667	1021034
21	NaN	NaN	3.6	NaN	NaN	3.6	137.867	1021080	1021081	1021077	1158.83	532.5	1146.83	544.833	9	21.4667	13.0667	1021038
21	NaN	NaN	5.33333	NaN	NaN	5.33333	136.133	1021086	1021087	1021041	1095.83	278.5	1095.83	258.833	9	18.4	14.4	1021037
21	NaN	6.4	NaN	NaN	6.4	NaN	133.067	1021093	1021094	1021065	1525	833	1525.5	819	9	14.5333	13.8667	1021061
21	NaN	NaN	0.533333	NaN	NaN	0.533333	136.133	1021097	1021098	1021078	1268	395	1262.5	395	9	19.7333	13.0667	1021038
22	14.1333	NaN	NaN	15.6	NaN	NaN	20	102202	102203	102201	705.333	669.333	682.667	665.333	2	NaN	NaN	1022000
22	NaN	NaN	0.266667	NaN	NaN	0.266667	34.1333	102205	102206	102202	712	533.333	718.667	546.667	3	14.1333	NaN	102201
22	16.2667	NaN	NaN	14.1333	NaN	NaN	35.6	102208	102209	102203	725.5	716	700	709.5	3	15.6	NaN	102201
22	14.5333	NaN	NaN	14.9333	NaN	NaN	51.8667	1022011	1022012	102208	656.5	573.5	636.5	575.5	4	16.2667	15.6	102203
22	15.7333	NaN	NaN	21.4667	NaN	NaN	66.4	1022014	1022015	1022011	711.5	475.5	706	487.5	5	14.5333	16.2667	102208
22	16.1333	NaN	NaN	16.9333	NaN	NaN	82.1333	1022017	1022018	1022014	859.5	570	844.5	550	6	15.7333	14.5333	1022011
22	13.7333	NaN	NaN	16.2667	NaN	NaN	99.0667	1022029	1022030	1022018	796.833	531.167	782.833	519.5	7	16.9333	15.7333	1022014
22	NaN	NaN	28.6667	NaN	NaN	28.6667	112.8	1022023	1022024	1022029	736.75	695.5	735.25	709.75	8	13.7333	16.9333	1022018
22	NaN	NaN	26.1333	NaN	NaN	26.1333	115.333	1022026	1022027	1022030	827.833	635.833	829.5	615.5	8	16.2667	16.9333	1022018
22	16.9333	NaN	NaN	14.4	NaN	NaN	98.2667	1022021	1022020	1022017	821.5	523	817	539.5	7	16.1333	15.7333	1022014
22	NaN	NaN	26.2667	NaN	NaN	26.2667	115.2	1022032	1022033	1022021	780.833	599.5	763.833	581.833	8	16.9333	16.1333	1022017
22	NaN	NaN	28.8	NaN	NaN	28.8	112.667	1022036	1022035	1022020	721.167	505.833	740.167	518.833	8	14.4	16.1333	1022017
22	14	NaN	NaN	15.6	NaN	NaN	87.8667	1022038	1022039	1022015	1037.5	662	1025	631.5	6	21.4667	14.5333	1022011
22	13.2	NaN	NaN	10.5333	NaN	NaN	101.867	1022041	1022042	1022038	1106.5	587	1086.5	553.5	7	14	21.4667	1022015
22	NaN	NaN	26.4	NaN	NaN	26.4	115.067	1022043	1022044	1022041	1063.5	870	1063	890	8	13.2	14	1022038
22	NaN	NaN	29.0667	NaN	NaN	29.0667	112.4	1022045	1022046	1022042	1034	405.5	1015	407.5	8	10.5333	14	1022038
22	13.0667	NaN	NaN	13.4667	NaN	NaN	103.467	1022048	1022049	1022039	1076.5	758	1058.5	747	7	15.6	21.4667	1022015
22	NaN	NaN	24.9333	NaN	NaN	24.9333	116.533	1022051	1022052	1022048	1025	947.5	1013	935	8	13.0667	15.6	1022039
22	NaN	NaN	24.5333	NaN	NaN	24.5333	116.933	1022054	1022055	1022049	1059	533	1045.5	538	8	13.4667	15.6	1022039
22	NaN	24.5333	NaN	NaN	19.3333	NaN	66.8	1022057	1022058	1022012	782.833	603.833	769.167	613.5	5	14.9333	16.2667	102208
22	12.6667	NaN	NaN	16	NaN	NaN	49.7333	1022062	1022063	102209	1320	987	1306	999	4	14.1333	15.6	102203
22	14.8	NaN	NaN	16.8	NaN	NaN	62.4	1022065	1022066	1022062	1480.5	1060.5	1477.5	1043.5	5	12.6667	14.1333	102209
22	20.4	NaN	NaN	15.2	NaN	NaN	77.2	1022068	1022069	1022065	1466	1297	1465.5	1319.5	6	14.8	12.6667	1022062
22	15.0667	NaN	NaN	13.8667	NaN	NaN	97.6	1022071	1022072	1022068	1298	997	1279.5	1001.5	7	20.4	14.8	1022065
22	NaN	NaN	28.8	NaN	NaN	28.8	112.667	1022074	1022075	1022071	1178	1124	1162.5	1132	8	15.0667	20.4	1022068
22	NaN	NaN	30	NaN	NaN	30	111.467	1022077	1022078	1022072	1226.5	952.5	1207	944.5	8	13.8667	20.4	1022068
22	13.4667	NaN	NaN	13.2	NaN	NaN	92.4	1022080	1022081	1022069	1437	1369.5	1419.5	1366	7	15.2	14.8	1022065
22	NaN	NaN	35.6	NaN	NaN	35.6	105.867	1022083	1022084	1022080	1120	1329.5	1130	1340.5	8	13.4667	15.2	1022069
22	NaN	NaN	35.8667	NaN	NaN	35.8667	105.6	1022086	1022087	1022081	1333	1529.5	1327	1547.5	8	13.2	15.2	1022069
22	15.2	NaN	NaN	17.3333	NaN	NaN	79.2	1022089	1022090	1022066	1536	907	1529.5	895.5	6	16.8	12.6667	1022062
22	13.6	NaN	NaN	14.1333	NaN	NaN	94.4	1022092	1022093	1022089	1390.25	834	1375	843.5	7	15.2	16.8	1022066
22	NaN	NaN	33.4667	NaN	NaN	33.4667	108	1022095	1022096	1022092	1430.25	697.75	1423.75	709.5	8	13.6	15.2	1022089
22	NaN	NaN	32.9333	NaN	NaN	32.9333	108.533	1022098	1022099	1022093	1213	959.5	1213	977.5	8	14.1333	15.2	1022089
22	15.4667	NaN	NaN	14.5333	NaN	NaN	96.5333	10220110	10220111	1022090	1465.5	978	1455	971.5	7	17.3333	16.8	1022066
22	18.6667	NaN	NaN	16.2667	NaN	NaN	112	10220113	10220114	10220110	1177	884.5	1179	899	8	15.4667	17.3333	1022090
22	NaN	NaN	10.8	NaN	NaN	10.8	130.667	10220116	10220117	10220113	1127.5	902.5	1117.5	905.5	9	18.6667	15.4667	10220110
22	24.2667	NaN	NaN	NaN	NaN	30.4	111.067	10220120	10220121	10220111	1541.5	612.5	1528	591	8	14.5333	17.3333	1022090
22	NaN	NaN	6.13333	NaN	NaN	6.13333	135.333	10220123	10220124	10220120	1540	653	1526	642	9	24.2667	14.5333	10220111
22	NaN	NaN	13.2	NaN	NaN	13.2	128.267	10220127	10220128	10220114	1329.17	1068.17	1315.5	1061.17	9	16.2667	15.4667	10220110
22	17.2	NaN	NaN	15.0667	NaN	NaN	65.7333	10220130	10220131	1022063	1289.5	948.5	1277.5	936.5	5	16	14.1333	102209
22	NaN	NaN	1.06667	NaN	NaN	1.06667	82.9333	10220134	10220135	10220130	1383.5	1085	1365.5	1083.5	6	17.2	16	1022063
22	15.0667	NaN	NaN	14.6667	NaN	NaN	80.8	10220137	10220138	10220131	1239.83	960.167	1220.5	955.833	6	15.0667	16	1022063
22	12.5333	NaN	NaN	14.4	NaN	NaN	95.8667	10220140	10220141	10220137	1073.83	885.5	1053.17	890.833	7	15.0667	15.0667	10220131
22	NaN	NaN	33.0667	NaN	NaN	33.0667	108.4	10220143	10220144	10220140	1157.5	805.5	1139.83	800.833	8	12.5333	15.0667	10220137
22	NaN	NaN	31.2	NaN	NaN	31.2	110.267	10220146	10220147	10220141	1119.83	925.167	1117.5	906.5	8	14.4	15.0667	10220137
22	16.2667	NaN	NaN	16.2667	NaN	NaN	95.4667	10220150	10220149	10220138	1553.5	914.167	1552.17	931.833	7	14.6667	15.0667	10220131
22	NaN	NaN	29.7333	NaN	NaN	29.7333	111.733	10220152	10220153	10220150	1554.5	885.5	1546.5	870.833	8	16.2667	14.6667	10220138
22	NaN	NaN	29.7333	NaN	NaN	29.7333	111.733	10220155	10220156	10220149	1546.5	1072.5	1539.83	1057.83	8	16.2667	14.6667	10220138
23	NaN	NaN	6.8	15.0667	NaN	NaN	15.0667	102302	102303	102301	1706.83	972.167	1708.83	992.167	2	NaN	NaN	1023000
23	NaN	NaN	0.266667	NaN	NaN	0.266667	30.1333	102305	102306	102303	1436.17	1046.17	1424.17	1056.17	3	15.0667	NaN	102301
24	14.4	NaN	NaN	13.6	NaN	NaN	9.46667	102402	102403	102401	150.667	186.667	150.667	205.333	2	NaN	NaN	1024000
24	16.6667	NaN	NaN	16.4	NaN	NaN	23.8667	102405	102406	102402	677.5	472.833	665.5	462.833	3	14.4	NaN	102401
24	16.9333	NaN	NaN	15.4667	NaN	NaN	40.5333	102408	102409	102405	810.167	546.167	788.167	532.833	4	16.6667	14.4	102402
24	16	NaN	NaN	16.9333	NaN	NaN	57.4667	1024011	1024012	102408	803.5	683.5	795.5	669	5	16.9333	16.6667	102405
24	17.4667	NaN	NaN	16.2667	NaN	NaN	73.4667	1024014	1024015	1024011	917.833	881.167	911.167	897.167	6	16	16.9333	102408
24	18.4	NaN	NaN	17.6	NaN	NaN	90.9333	1024017	1024018	1024014	676.167	730.5	679.167	752.833	7	17.4667	16	1024011
24	NaN	NaN	32.1333	NaN	NaN	32.1333	109.333	1024020	1024021	1024017	780.5	845.833	753.167	849.5	8	18.4	17.4667	1024014
24	NaN	NaN	32.9333	NaN	NaN	32.9333	108.533	1024023	1024024	1024018	704.167	964.5	692.833	978.5	8	17.6	17.4667	1024014
24	16.1333	NaN	NaN	15.4667	NaN	NaN	89.7333	1024026	1024027	1024015	975.167	934.833	969.5	951.833	7	16.2667	16	1024011
24	NaN	NaN	35.6	NaN	NaN	35.6	105.867	1024029	1024030	1024026	792.833	999.167	775.833	1016.83	8	16.1333	16.2667	1024015
24	NaN	NaN	36.2667	NaN	NaN	36.2667	105.2	1024032	1024033	1024027	713.5	1035.5	702.833	1051.5	8	15.4667	16.2667	1024015
24	16.2667	NaN	NaN	17.0667	NaN	NaN	74.4	1024035	1024036	1024012	913.5	745.5	892.5	747	6	16.9333	16.9333	102408
24	14.6667	NaN	NaN	16.6667	NaN	NaN	90.6667	1024038	1024039	1024035	805.25	893.75	789.25	903.75	7	16.2667	16.9333	1024012
24	NaN	NaN	36.1333	NaN	NaN	36.1333	105.333	1024041	1024042	1024038	766.5	833.833	747.167	831.833	8	14.6667	16.2667	1024035
24	NaN	NaN	34.1333	NaN	NaN	34.1333	107.333	1024044	1024045	1024039	734.5	813.5	718.167	812.833	8	16.6667	16.2667	1024035
24	12.8	NaN	NaN	14.5333	NaN	NaN	91.4667	1024047	1024048	1024036	852.833	586.167	858.167	546.833	7	17.0667	16.9333	1024012
24	14.5333	NaN	NaN	14.2667	NaN	NaN	104.267	1024050	1024051	1024047	614.167	517.167	591.833	523.5	8	12.8	17.0667	1024036
24	NaN	NaN	22.6667	NaN	NaN	22.6667	118.8	1024053	1024054	1024050	447.5	811.833	451.5	791.5	9	14.5333	12.8	1024047
24	NaN	NaN	22.9333	NaN	NaN	22.9333	118.533	1024056	1024057	1024051	612.167	572.167	597.833	566.5	9	14.2667	12.8	1024047
24	NaN	NaN	35.4667	NaN	NaN	35.4667	106	1024059	1024060	1024048	678	440.5	671.5	456.5	8	14.5333	17.0667	1024036
24	17.2	NaN	NaN	16.5333	NaN	NaN	56	1024062	1024063	102409	563	612	552	625	5	15.4667	16.6667	102405
24	15.4667	NaN	NaN	18.6667	NaN	NaN	73.2	1024065	1024066	1024062	578.5	601.5	559.5	614.5	6	17.2	15.4667	102409
24	13.4667	NaN	NaN	14.1333	NaN	NaN	88.6667	1024068	1024069	1024065	792.5	393	774.5	408	7	15.4667	17.2	1024062
24	17.0667	NaN	NaN	NaN	NaN	12.4	102.133	1024070	1024071	1024068	980.5	472.5	963.5	481	8	13.4667	15.4667	1024065
24	NaN	NaN	22.2667	NaN	NaN	22.2667	119.2	1024073	1024074	1024070	1070	396	1055.5	379.5	9	17.0667	13.4667	1024068
24	15.4667	NaN	NaN	15.7333	NaN	NaN	102.8	1024077	1024078	1024069	1087	422	1079.5	404	8	14.1333	15.4667	1024065
24	NaN	NaN	23.2	NaN	NaN	23.2	118.267	1024080	1024081	1024077	907.5	521.5	901.5	507	9	15.4667	14.1333	1024069
24	NaN	NaN	22.9333	NaN	NaN	22.9333	118.533	1024083	1024084	1024078	968	318.5	965	297	9	15.7333	14.1333	1024069
24	18.6667	NaN	NaN	18.4	NaN	NaN	91.8667	1024086	1024087	1024066	754.5	626.5	739	639.5	7	18.6667	17.2	1024062
24	NaN	NaN	30.9333	NaN	NaN	30.9333	110.533	1024089	1024090	1024086	986.5	546.5	971.5	553	8	18.6667	18.6667	1024066
24	NaN	NaN	31.2	NaN	NaN	31.2	110.267	1024092	1024093	1024087	787	657.5	777.5	636.5	8	18.4	18.6667	1024066
24	13.4667	NaN	NaN	NaN	NaN	0.8	72.5333	1024095	1024096	1024063	625	886.5	610.5	879	6	16.5333	15.4667	102409
24	13.3333	NaN	NaN	12.5333	NaN	NaN	86	1024098	1024099	1024095	891.5	1037.5	872	1028.5	7	13.4667	16.5333	1024063
24	11.7333	NaN	NaN	11.8667	NaN	NaN	99.3333	10240101	10240102	1024098	854	1260	835.5	1269	8	13.3333	13.4667	1024095
24	NaN	NaN	30.4	NaN	NaN	30.4	111.067	10240104	10240105	10240101	710.5	1347	686.5	1347.5	9	11.7333	13.3333	1024098
24	NaN	NaN	30.2667	NaN	NaN	30.2667	111.2	10240107	10240108	10240102	813	1433	794.5	1422.5	9	11.8667	13.3333	1024098
24	13.3333	NaN	NaN	14.1333	NaN	NaN	98.5333	10240110	10240111	1024099	799.5	940	795.5	959.5	8	12.5333	13.4667	1024095
24	NaN	NaN	29.6	NaN	NaN	29.6	111.867	10240113	10240114	10240110	798.5	935	782.5	949	9	13.3333	12.5333	1024099
24	NaN	NaN	28.8	NaN	NaN	28.8	112.667	10240116	10240117	10240111	834	946	821	958.5	9	14.1333	12.5333	1024099
24	14.4	NaN	NaN	16	NaN	NaN	40.2667	10240119	10240120	102406	638.5	352	621.5	354.5	4	16.4	14.4	102402
24	13.0667	NaN	NaN	13.2	NaN	NaN	54.6667	10240122	10240123	10240119	693	212.5	691.5	234.5	5	14.4	16.4	102406
24	16.1333	NaN	NaN	17.6	NaN	NaN	67.7333	10240125	10240126	10240122	795	248	785	270	6	13.0667	14.4	10240119
24	14.1333	NaN	NaN	27.6	NaN	NaN	83.8667	10240128	10240129	10240125	999.5	309.5	977.5	302.5	7	16.1333	13.0667	10240122
24	13.0667	NaN	NaN	NaN	NaN	7.46667	98	10240131	10240132	10240128	999	139	979.5	144	8	14.1333	16.1333	10240125
24	NaN	NaN	30.4	NaN	NaN	30.4	111.067	10240134	10240135	10240131	823	154	806.5	165	9	13.0667	14.1333	10240128
24	NaN	NaN	30	NaN	NaN	30	111.467	10240138	10240139	10240129	1007	161.5	995.5	148	8	27.6	16.1333	10240125
24	15.6	NaN	NaN	16	NaN	NaN	85.3333	10240141	10240142	10240126	807	295	791	311.5	7	17.6	13.0667	10240122
24	14.1333	NaN	NaN	14.6667	NaN	NaN	100.933	10240144	10240145	10240141	824	435.5	796	438.5	8	15.6	17.6	10240126
24	NaN	NaN	26.4	NaN	NaN	26.4	115.067	10240147	10240148	10240144	849	298	849	319.5	9	14.1333	15.6	10240141
24	NaN	NaN	25.8667	NaN	NaN	25.8667	115.6	10240150	10240151	10240145	667.5	245	654	231	9	14.6667	15.6	10240141
24	14.1333	NaN	NaN	12.8	NaN	NaN	101.333	10240153	10240154	10240142	970.5	285.5	946	288	8	16	17.6	10240126
24	NaN	NaN	26	NaN	NaN	26	115.467	10240156	10240157	10240153	801	174	796.5	204.5	9	14.1333	16	10240142
24	NaN	NaN	27.3333	NaN	NaN	27.3333	114.133	10240159	10240160	10240154	1117.5	196	1104	205	9	12.8	16	10240142
24	18.9333	NaN	NaN	16	NaN	NaN	67.8667	10240162	10240163	10240123	765	252.5	749.5	256.5	6	13.2	14.4	10240119
24	16.2667	NaN	NaN	13.8667	NaN	NaN	86.8	10240165	10240166	10240162	738	61	715.5	56.5	7	18.9333	13.2	10240123
24	16.9333	NaN	NaN	14.9333	NaN	NaN	103.067	10240167	10240168	10240165	775.5	85	760.5	100.5	8	16.2667	18.9333	10240162
24	NaN	NaN	21.4667	NaN	NaN	21.4667	120	10240170	10240171	10240167	766.5	217	749.5	217.5	9	16.9333	16.2667	10240165
24	NaN	NaN	23.4667	NaN	NaN	23.4667	118	10240173	10240174	10240168	887	87.5	886	73.5	9	14.9333	16.2667	10240165
24	NaN	6.26667	NaN	14.1333	NaN	NaN	100.667	10240176	10240177	10240166	637	110.5	619	125	8	13.8667	18.9333	10240162
24	NaN	NaN	26.6667	NaN	NaN	26.6667	114.8	10240181	10240182	10240177	408	122.5	406	109.5	9	14.1333	13.8667	10240166
24	17.6	NaN	NaN	16.5333	NaN	NaN	83.8667	10240184	10240185	10240163	1000	163.5	978.5	169.5	7	16	13.2	10240123
24	15.2	NaN	NaN	14.2667	NaN	NaN	101.467	10240187	10240188	10240184	995.5	276	979	271	8	17.6	16	10240163
24	NaN	NaN	24.8	NaN	NaN	24.8	116.667	10240190	10240191	10240187	994.5	220.5	987	226.5	9	15.2	17.6	10240184
24	NaN	NaN	25.7333	NaN	NaN	25.7333	115.733	10240193	10240194	10240188	851	209	844.5	197.5	9	14.2667	17.6	10240184
24	NaN	9.33333	NaN	NaN	9.33333	NaN	100.4	10240196	10240197	10240185	1058	178.5	1046.5	184.5	8	16.5333	16	10240163
24	16.4	NaN	NaN	14.4	NaN	NaN	56.2667	10240200	10240201	10240120	474	600	472.5	580.5	5	16	16.4	102406
24	15.6	NaN	NaN	16.5333	NaN	NaN	72.6667	10240203	10240204	10240200	509	493.5	508.5	516	6	16.4	16	10240120
24	16.6667	NaN	NaN	16	NaN	NaN	88.2667	10240205	10240206	10240203	455	464.5	452	488	7	15.6	16.4	10240200
24	14.6667	NaN	NaN	14.8	NaN	NaN	104.933	10240208	10240209	10240205	291	407.5	287.5	425.5	8	16.6667	15.6	10240203
24	NaN	NaN	21.8667	NaN	NaN	21.8667	119.6	10240210	10240211	10240208	238	426.5	211	420	9	14.6667	16.6667	10240205
24	NaN	NaN	21.7333	NaN	NaN	21.7333	119.733	10240212	10240213	10240209	98	519	88.5	540.5	9	14.8	16.6667	10240205
24	15.7333	NaN	NaN	13.6	NaN	NaN	104.267	10240215	10240216	10240206	479.5	369.5	461.5	359.5	8	16	15.6	10240203
24	NaN	NaN	21.4667	NaN	NaN	21.4667	120	10240218	10240219	10240215	500	537.5	486.5	530	9	15.7333	16	10240206
24	NaN	NaN	23.6	NaN	NaN	23.6	117.867	10240221	10240222	10240216	500	648.5	490	661.5	9	13.6	16	10240206
24	15.2	NaN	NaN	16.6667	NaN	NaN	89.2	10240224	10240225	10240204	283.5	428.5	271	412	7	16.5333	16.4	10240200
24	14.9333	NaN	NaN	18.1333	NaN	NaN	104.4	10240226	10240227	10240224	200.5	502.5	195	521	8	15.2	16.5333	10240204
24	NaN	NaN	22.1333	NaN	NaN	22.1333	119.333	10240229	10240230	10240226	230	394.5	227	378.5	9	14.9333	15.2	10240224
24	NaN	NaN	18.9333	NaN	NaN	18.9333	122.533	10240232	10240233	10240227	308	529.5	292.5	514	9	18.1333	15.2	10240224
24	NaN	NaN	35.6	NaN	NaN	35.6	105.867	10240234	10240235	10240225	178.5	388	147.5	397.5	8	16.6667	16.5333	10240204
24	18.6667	NaN	NaN	18.6667	NaN	NaN	70.6667	10240239	10240240	10240201	337.5	448.5	321.5	442	6	14.4	16	10240120
24	14.1333	NaN	NaN	14.8	NaN	NaN	89.3333	10240242	10240243	10240239	511	368.5	484	375.5	7	18.6667	14.4	10240201
24	15.6	NaN	NaN	16.6667	NaN	NaN	103.467	10240245	10240246	10240242	468	449.5	467	465.5	8	14.1333	18.6667	10240239
24	NaN	NaN	22.4	NaN	NaN	22.4	119.067	10240248	10240249	10240245	714	763.5	710	744.5	9	15.6	14.1333	10240242
24	NaN	NaN	21.3333	NaN	NaN	21.3333	120.133	10240251	10240252	10240246	551.5	500	537	520	9	16.6667	14.1333	10240242
24	16.8	NaN	NaN	17.6	NaN	NaN	104.133	10240253	10240254	10240243	623.5	204.5	607.5	217.5	8	14.8	18.6667	10240239
24	NaN	NaN	20.5333	NaN	NaN	20.5333	120.933	10240256	10240257	10240253	618.5	141	604.5	152	9	16.8	14.8	10240243
24	NaN	NaN	19.7333	NaN	NaN	19.7333	121.733	10240259	10240260	10240254	730	183	713.5	187.5	9	17.6	14.8	10240243
24	16.1333	NaN	NaN	17.7333	NaN	NaN	89.3333	10240262	10240263	10240240	327.5	452.5	309	454.5	7	18.6667	14.4	10240201
24	NaN	NaN	36	NaN	NaN	36	105.467	10240265	10240266	10240262	306	447.5	300.5	434.5	8	16.1333	18.6667	10240240
24	NaN	NaN	34.4	NaN	NaN	34.4	107.067	10240268	10240269	10240263	272.5	517	265.5	535.5	8	17.7333	18.6667	10240240
24	12.6667	NaN	NaN	14.4	NaN	NaN	23.0667	10240271	10240272	102403	200.167	214.833	186.833	229.5	3	13.6	NaN	102401
24	NaN	NaN	0.266667	NaN	NaN	0.266667	35.7333	10240274	10240275	10240271	1692.17	939.5	1678.5	954.5	4	12.6667	13.6	102403
24	NaN	NaN	0.266667	NaN	NaN	0.266667	37.4667	10240277	10240278	10240272	1362.67	646.667	1376	660	4	14.4	13.6	102403

## Sheet: rep3
Lineage ID	Sibling 1 cycle length	Sibling 1 time to death	Sibling 1 time to cell loss	Sibling 2 cycle length	Sibling 2 time to death	Sibling 2 time to cell loss	Birth time	Sibling 1 ID	Sibling 2 ID	Mother ID	Birth x position sibling 1	Birth y position sibling 1	Birth x position sibling 2	Birth y position sibling 2	Generation	Mother cycle length	Grandmother cycle length	Grandmother ID
2	16.3	NaN	NaN	NaN	NaN	5.1	12.6	10202	10203	10201	1306.67	401.333	1308	426.667	2	NaN	NaN	102000
2	NaN	NaN	0.4	NaN	NaN	0.4	28.9	10205	10206	10202	1234	774.5	1222.5	798	3	16.3	NaN	10201
3	18.3	NaN	NaN	NaN	NaN	14.1	0	10302	10303	10301	653.333	50.667	640	61.333	2	NaN	NaN	103000
3	19.4	NaN	NaN	19	NaN	NaN	18.3	10305	10306	10302	670.667	106.667	662.667	109.333	3	18.3	NaN	10301
3	17.8	NaN	NaN	20.5	NaN	NaN	37.7	10308	10309	10305	865.5	247.5	842.167	250.167	4	19.4	18.3	10302
3	15.1	NaN	NaN	NaN	22.4	NaN	55.5	103011	103012	10308	758.167	159.5	757.5	178.167	5	17.8	19.4	10305
3	14.2	NaN	NaN	NaN	23.1	NaN	37.3	103019	103020	10306	883	389.5	869	410.5	4	19	18.3	10302
3	16.1	NaN	NaN	19.9	NaN	NaN	51.5	103022	103023	103019	917	387.5	906.5	406.5	5	14.2	19	10306
3	16.2	NaN	NaN	18.9	NaN	NaN	67.6	103025	103026	103022	875	511	866	497	6	16.1	14.2	103019
3	17	NaN	NaN	15.9	NaN	NaN	83.8	103028	103029	103025	768.5	345.5	756.5	355	7	16.2	16.1	103022
3	NaN	NaN	0.8	NaN	NaN	0.8	58.2	103033	103034	10309	814.5	208.167	795.833	216.833	5	20.5	19.4	10305
3	NaN	NaN	16.9	16.8	NaN	NaN	70.6	103014	103015	103011	820.167	276.833	808.833	287.5	6	15.1	17.8	10308
3	16.1	NaN	NaN	16.9	NaN	NaN	71.4	103044	103045	103023	945.833	551.5	932.5	553.5	6	19.9	14.2	103019
3	18.7	NaN	NaN	NaN	28	NaN	87.4	103039	103040	103015	703.167	352.833	679.167	349.5	7	16.8	15.1	103011
3	17.6	NaN	NaN	16	NaN	NaN	87.5	103047	103048	103044	948.167	446.5	928.833	440.5	7	16.1	19.9	103023
3	21.6	NaN	NaN	18.3	NaN	NaN	86.5	103050	103051	103026	998.167	649.833	978.167	650.5	7	18.9	16.1	103022
3	NaN	17.3	NaN	20.2	NaN	NaN	88.3	103055	103056	103045	944.833	668.5	922.167	666.5	7	16.9	19.9	103023
3	NaN	NaN	20.6	NaN	NaN	20.6	99.7	103057	103058	103029	658.5	515	656	497	8	15.9	16.2	103025
3	NaN	NaN	19.5	NaN	NaN	19.5	100.8	103060	103061	103028	894	667	884.5	647.5	8	17	16.2	103025
3	NaN	6.7	NaN	NaN	7.4	NaN	106.1	103064	103065	103039	821	328.5	810.5	337.5	8	18.7	16.8	103015
3	NaN	NaN	15.2	NaN	NaN	15.2	105.1	103070	103071	103047	723.5	250.5	707	244.5	8	17.6	16.1	103044
3	NaN	NaN	16.8	NaN	NaN	16.8	103.5	103075	103076	103048	847	374	846.5	357	8	16	16.1	103044
3	NaN	10.1	NaN	NaN	NaN	12.2	108.1	103079	103080	103050	1208	788	1205	770	8	21.6	18.9	103026
3	NaN	NaN	0.2	NaN	NaN	0.2	104.8	103084	103085	103051	903	308.5	888.5	305	8	18.3	18.9	103026
3	NaN	11.8	NaN	NaN	1.7	NaN	108.5	103088	103089	103056	991	706	983.5	730	8	20.2	16.9	103045
4	16.7	NaN	NaN	19	NaN	NaN	3.4	10402	10403	10401	297	651.5	278.5	654	2	NaN	NaN	104000
4	25.7	NaN	NaN	25.5	NaN	NaN	20.1	10405	10406	10402	223	868	207.5	876.5	3	16.7	NaN	10401
4	22.2	NaN	NaN	18.8	NaN	NaN	45.8	10408	10409	10405	267.5	978.5	263	997.5	4	25.7	16.7	10402
4	16.3	NaN	NaN	16.9	NaN	NaN	68	104011	104012	10408	301.5	932.5	297	958	5	22.2	25.7	10405
4	19.2	NaN	NaN	NaN	NaN	18.8	22.4	104017	104018	10403	508.5	437.5	488	456	3	19	NaN	10401
4	17	NaN	NaN	14.9	NaN	NaN	41.6	104020	104021	104017	626	206	613	216	4	19.2	19	10403
4	15.5	NaN	NaN	NaN	NaN	10.6	58.6	104023	104024	104020	480	159.5	481	176.5	5	17	19.2	104017
4	15.5	NaN	NaN	16.6	NaN	NaN	74.1	104026	104027	104023	302.5	233.5	282.5	239.5	6	15.5	17	104020
4	NaN	NaN	1.7	NaN	NaN	4.6	45.6	104032	104033	10406	30.5	1110	17	1126	4	25.5	16.7	10402
4	16.5	NaN	NaN	16.3	NaN	NaN	64.6	104037	104038	10409	733	897	725	918.5	5	18.8	25.7	10405
4	15.4	NaN	NaN	15.6	NaN	NaN	56.5	104051	104052	104021	480.5	664	485.5	651.5	5	14.9	19.2	104017
4	15.8	NaN	NaN	13.8	NaN	NaN	71.9	104054	104055	104051	619.5	623	618	603.5	6	15.4	14.9	104021
4	14.3	NaN	NaN	15.8	NaN	NaN	72.1	104065	104066	104052	340	721.5	321	735	6	15.6	14.9	104021
4	NaN	NaN	4.7	15.5	NaN	NaN	84.3	104014	104015	104011	91.5	1139.5	79.5	1163.5	6	16.3	22.2	10408
4	NaN	NaN	1.7	NaN	NaN	3.4	89.6	104029	104030	104026	90.833	309.5	74.833	318.167	7	15.5	15.5	104023
4	18.9	NaN	NaN	15.8	NaN	NaN	81.1	104040	104041	104037	384	1110	369	1117	6	16.5	18.8	10409
4	17.4	NaN	NaN	17.3	NaN	NaN	80.9	104043	104044	104038	427	1021	415.5	1041	6	16.3	18.8	10409
4	18.4	NaN	NaN	15.2	NaN	NaN	84.9	104046	104047	104012	319	834	311	822	6	16.9	22.2	10408
4	15.3	NaN	NaN	19.5	NaN	NaN	87.7	104057	104058	104054	527	398.5	507	406	7	15.8	15.4	104051
4	18.7	NaN	NaN	NaN	NaN	10.1	90.7	104062	104063	104027	63.5	460.5	46.5	468.5	7	16.6	15.5	104023
4	NaN	NaN	10.8	18.6	NaN	NaN	86.4	104068	104069	104065	152	946	139.5	959	7	14.3	15.6	104052
4	14.1	NaN	NaN	16.6	NaN	NaN	85.7	104071	104072	104055	548	266	539	290	7	13.8	15.4	104051
4	NaN	NaN	2.9	NaN	NaN	12.7	87.9	104074	104075	104066	120	348	106	355	7	15.8	15.6	104052
4	NaN	NaN	3.8	NaN	NaN	5.4	99.8	104078	104079	104015	119.5	1001	115	1017.5	7	15.5	16.3	104011
4	NaN	NaN	20.3	NaN	NaN	0.2	100	104085	104086	104040	290.5	1296.17	280.167	1314.17	7	18.9	16.5	104037
4	NaN	NaN	23.4	NaN	NaN	23.4	96.9	104089	104090	104041	556.167	1102.83	541.167	1101.17	7	15.8	16.5	104037
4	16.8	NaN	NaN	20.1	NaN	NaN	98.3	104093	104094	104043	233.167	1099.5	221.167	1110.17	7	17.4	16.3	104038
4	NaN	NaN	5.2	NaN	NaN	5.2	115.1	104096	104097	104093	216.167	1047.83	200.167	1041.17	8	16.8	17.4	104043
4	19.8	NaN	NaN	21.8	NaN	NaN	98.2	1040101	1040102	104044	218.5	1260.5	215.5	1276	7	17.3	16.3	104038
4	NaN	NaN	2.3	NaN	NaN	2.3	118	1040104	1040105	1040101	40.5	1182.5	32.5	1164.5	8	19.8	17.3	104044
4	NaN	NaN	17	NaN	NaN	17	103.3	1040109	1040110	104046	560.5	956	542	949.5	7	18.4	16.9	104012
4	NaN	NaN	20.2	NaN	NaN	20.2	100.1	1040114	1040115	104047	587	968.5	564.5	982.5	7	15.2	16.9	104012
4	NaN	NaN	17.3	NaN	NaN	17.3	103	1040119	1040120	104057	619.5	664	618.5	638.5	8	15.3	15.8	104054
4	NaN	NaN	13.1	NaN	NaN	13.1	107.2	1040124	1040125	104058	647	78	631.5	68.5	8	19.5	15.8	104054
4	NaN	NaN	10.9	NaN	NaN	10.9	109.4	1040128	1040129	104062	62.5	522	50.5	525	8	18.7	16.6	104027
4	NaN	14.5	NaN	NaN	NaN	15.3	105	1040135	1040136	104069	148	988.5	126.5	987.5	8	18.6	14.3	104065
4	NaN	NaN	20.5	NaN	NaN	20.5	99.8	1040140	1040141	104071	331	425	327	442	8	14.1	13.8	104055
4	NaN	NaN	18	NaN	NaN	18	102.3	1040145	1040146	104072	397	207	398	215.5	8	16.6	13.8	104055
4	NaN	NaN	1.9	NaN	NaN	1.9	118.4	1040151	1040152	104094	118.5	1016.5	99	1011	8	20.1	17.4	104043
4	NaN	NaN	0.3	NaN	NaN	0.3	120	1040156	1040157	1040102	356.5	1253.5	340	1252	8	21.8	17.3	104044
9	NaN	NaN	0.7	NaN	NaN	0.7	5.7	10902	10903	10901	961.333	340	964	325.333	2	NaN	NaN	109000
10	14.9	NaN	NaN	18	NaN	NaN	16.2	101002	101003	101001	537.333	680	525.333	690.667	2	NaN	NaN	1010000
10	15.9	NaN	NaN	14.2	NaN	NaN	31.1	101005	101006	101002	760.5	584	746	596	3	14.9	NaN	101001
10	18.4	NaN	NaN	16.3	NaN	NaN	47	101008	101009	101005	1082.67	621.333	1084	636	4	15.9	14.9	101002
10	NaN	NaN	8.3	18.2	NaN	NaN	65.4	1010011	1010012	101008	1351.5	344	1342.5	350	5	18.4	15.9	101005
10	NaN	NaN	1.2	NaN	NaN	1.2	34.2	1010015	1010016	101003	664.167	746.833	661.5	760.833	3	18	NaN	101001
10	14.7	NaN	NaN	14.9	NaN	NaN	45.3	1010019	1010020	101006	696	463.5	673	457.5	4	14.2	14.9	101002
10	17.5	NaN	NaN	20.4	NaN	NaN	60	1010022	1010023	1010019	648	418.5	632	426	5	14.7	14.2	101006
10	14.8	NaN	NaN	16.9	NaN	NaN	77.5	1010025	1010026	1010022	381.833	546.167	380.5	526.5	6	17.5	14.7	1010019
10	19.9	NaN	NaN	20	NaN	NaN	63.3	1010031	1010032	101009	1185.5	825	1173	823	5	16.3	15.9	101005
10	16.6	NaN	NaN	20	NaN	NaN	60.2	1010040	1010041	1010020	493.5	246	475	268	5	14.9	14.2	101006
10	NaN	8.2	NaN	NaN	8.2	NaN	76.8	1010043	1010044	1010040	694.5	415	687.5	430.5	6	16.6	14.9	1010020
10	18.3	NaN	NaN	15.9	NaN	NaN	92.3	1010028	1010029	1010025	293.5	510.167	277.167	504.833	7	14.8	17.5	1010022
10	16.4	NaN	NaN	14.4	NaN	NaN	83.2	1010034	1010035	1010031	1208.5	997.5	1200.5	1018.5	6	19.9	16.3	101009
10	17.4	NaN	NaN	18.7	NaN	NaN	83.6	1010037	1010038	1010012	1138	343	1121.5	349.5	6	18.2	18.4	101008
10	NaN	NaN	39.9	NaN	39.9	NaN	80.4	1010047	1010048	1010023	904	606	886	618.5	6	20.4	14.7	1010019
10	18.9	NaN	NaN	18.4	NaN	NaN	94.4	1010050	1010051	1010026	370	466.5	365	456.5	7	16.9	17.5	1010022
10	15.1	NaN	NaN	16.2	NaN	NaN	83.3	1010053	1010054	1010032	1091.5	696.167	1086.5	717.5	6	20	16.3	101009
10	16.1	NaN	NaN	15.9	NaN	NaN	80.2	1010056	1010057	1010041	332.5	238.5	319.5	259.5	6	20	14.9	1010020
10	NaN	NaN	9.7	NaN	NaN	9.7	110.6	1010061	1010062	1010028	272.5	587.5	262.5	571.5	8	18.3	14.8	1010025
10	NaN	NaN	12.1	NaN	NaN	12.1	108.2	1010064	1010065	1010029	298	521	273.5	524.5	8	15.9	14.8	1010025
10	NaN	NaN	20.7	NaN	NaN	20.7	99.6	1010068	1010069	1010034	1131	1138	1133.5	1118	7	16.4	19.9	1010031
10	17.7	NaN	NaN	NaN	NaN	5.1	97.6	1010073	1010074	1010035	1261.5	1176	1255	1165	7	14.4	19.9	1010031
10	NaN	NaN	5	NaN	NaN	5	115.3	1010076	1010077	1010073	1256	949	1251.5	935.5	8	17.7	14.4	1010035
10	NaN	NaN	19.3	NaN	NaN	19.3	101	1010081	1010082	1010037	1300.5	427.5	1282.5	431	7	17.4	18.2	1010012
10	NaN	NaN	18	NaN	NaN	18	102.3	1010085	1010086	1010038	1100	373	1092	360	7	18.7	18.2	1010012
10	NaN	NaN	7	NaN	NaN	7	113.3	1010092	1010093	1010050	254.833	319.167	255.5	308.5	8	18.9	16.9	1010026
10	NaN	NaN	7.5	NaN	NaN	7.5	112.8	1010097	1010098	1010051	345.5	386	331.5	392.5	8	18.4	16.9	1010026
10	16.9	NaN	NaN	17.5	NaN	NaN	98.4	10100102	10100103	1010053	981.5	750	969	746	7	15.1	20	1010032
10	NaN	NaN	5	NaN	NaN	5	115.3	10100105	10100106	10100102	833	679.5	833	700	8	16.9	15.1	1010053
10	NaN	NaN	20.8	NaN	NaN	20.8	99.5	10100110	10100111	1010054	1049	907	1034.5	916.5	7	16.2	20	1010032
10	19.6	NaN	NaN	23.7	NaN	NaN	96.3	10100114	10100115	1010056	532	373.5	527.5	386	7	16.1	20	1010041
10	NaN	NaN	4.4	NaN	NaN	4.4	115.9	10100118	10100117	10100114	597	260	610	249	8	19.6	16.1	1010056
10	17.7	NaN	NaN	17.9	NaN	NaN	96.1	10100120	10100121	1010057	406.5	522.5	405	505.5	7	15.9	20	1010041
10	NaN	NaN	6.5	NaN	NaN	6.5	113.8	10100124	10100125	10100120	393.5	498.5	389	487.5	8	17.7	15.9	1010057
10	NaN	NaN	4.4	NaN	NaN	4.4	115.9	10100130	10100131	10100103	836.5	805	829.5	789	8	17.5	15.1	1010053
10	NaN	NaN	6.3	NaN	NaN	6.3	114	10100135	10100136	10100121	365.5	492.5	361	477.5	8	17.9	15.9	1010057
10	NaN	NaN	0.3	NaN	NaN	0.3	120	10100140	10100141	10100115	639	242.5	632	261	8	23.7	16.1	1010056
11	34.9	NaN	NaN	26.2	NaN	NaN	2.5	101102	101103	101101	244	657.333	221.333	653.333	2	NaN	NaN	1011000
11	NaN	12.9	NaN	NaN	22.3	NaN	37.4	101105	101104	101102	403.5	479	414.5	492.5	3	34.9	NaN	101101
11	NaN	23.5	NaN	37.4	NaN	NaN	28.7	101109	1011010	101103	404.5	1038	403	1021.5	3	26.2	NaN	101101
11	NaN	11.9	NaN	NaN	14.2	NaN	66.1	1011012	1011013	1011010	705	930	696	942	4	37.4	26.2	101103
13	NaN	NaN	9.2	20	NaN	NaN	1	101302	101303	101301	1174	1005	1158	1021	2	NaN	NaN	1013000
13	20.4	NaN	NaN	NaN	NaN	7.8	21	101307	101308	101303	1213	1011	1212	1026	3	20	NaN	101301
13	16.4	NaN	NaN	NaN	10.9	NaN	41.4	101309	1013010	101307	1278	819	1266	802	4	20.4	20	101303
13	NaN	NaN	3.6	NaN	NaN	3.6	57.8	1013011	1013012	101309	1332	743	1323	766	5	16.4	20.4	101307
15	NaN	11.5	NaN	17.8	NaN	NaN	5.2	101502	101503	101501	1004	214	1002	208	2	NaN	NaN	1015000
15	NaN	NaN	0.6	NaN	NaN	0.6	23	101505	101506	101503	1350	397	1340	386	3	17.8	NaN	101501
16	17	NaN	NaN	15.1	NaN	NaN	3.1	101602	101603	101601	320	884	324	880	2	NaN	NaN	1016000
16	17.7	NaN	NaN	19.1	NaN	NaN	20.1	101605	101606	101602	404.833	1063.17	382.833	1051.17	3	17	NaN	101601
16	16.8	NaN	NaN	16.3	NaN	NaN	37.8	101608	101609	101605	695.5	1076.17	670.167	1077.5	4	17.7	17	101602
16	15	NaN	NaN	16.6	NaN	NaN	54.6	1016011	1016012	101608	522.833	1046.17	514.167	1034.83	5	16.8	17.7	101605
16	15.2	NaN	NaN	18.7	NaN	NaN	69.6	1016014	1016015	1016011	701	1185	684	1191.5	6	15	16.8	101608
16	14.9	NaN	NaN	16.6	NaN	NaN	18.2	1016020	1016021	101603	482.167	774.167	495.5	760.833	3	15.1	NaN	101601
16	NaN	NaN	0.3	NaN	NaN	0.3	33.1	1016023	1016024	1016020	558.167	957.5	538.833	973.5	4	14.9	15.1	101603
16	20.6	NaN	NaN	17.9	NaN	NaN	39.2	1016026	1016027	101606	254.167	1142.17	243.5	1138.17	4	19.1	17	101602
16	15.9	NaN	NaN	17.2	NaN	NaN	59.8	1016029	1016030	1016026	320.833	1200.83	304.167	1191.5	5	20.6	19.1	101606
16	15.5	NaN	NaN	17.7	NaN	NaN	54.1	1016034	1016035	101609	1138	1189	1130	1175	5	16.3	17.7	101605
16	NaN	NaN	12.2	15.4	NaN	NaN	69.6	1016037	1016038	1016034	934.833	1184.83	928.167	1201.5	6	15.5	16.3	101609
16	14.9	NaN	NaN	15.9	NaN	NaN	71.2	1016042	1016043	1016012	666.5	1063	651.5	1070	6	16.6	16.8	101608
16	16.5	NaN	NaN	16.2	NaN	NaN	34.8	1016051	1016052	1016021	377.5	657.5	371.5	640.833	4	16.6	15.1	101603
16	17.1	NaN	NaN	17.6	NaN	NaN	51.3	1016054	1016055	1016051	517.5	531.5	504.833	532.833	5	16.5	16.6	1016021
16	NaN	NaN	9.3	17.3	NaN	NaN	68.4	1016057	1016058	1016054	521.833	216.167	515.167	197.5	6	17.1	16.5	1016051
16	16.7	NaN	NaN	17.5	NaN	NaN	57.1	1016062	1016061	1016027	324.167	1093.5	342.167	1122.17	5	17.9	19.1	101606
16	NaN	NaN	46.5	NaN	NaN	46.5	73.8	1016064	1016065	1016062	338.167	1141.5	324.833	1145.5	6	16.7	17.9	1016027
16	17.3	NaN	NaN	19.1	NaN	NaN	71.8	1016072	1016073	1016035	875	1202	871.5	1182	6	17.7	16.3	101609
16	19	NaN	NaN	16.8	NaN	NaN	51	1016084	1016085	1016052	796	778	782	792	5	16.2	16.6	1016021
16	17.8	NaN	NaN	16.8	NaN	NaN	67.8	1016088	1016089	1016085	840	596	828	585	6	16.8	16.2	1016052
16	16.3	NaN	NaN	16.2	NaN	NaN	70	1016086	1016087	1016084	653	577	640	592	6	19	16.2	1016052
16	15.7	NaN	NaN	14.9	NaN	NaN	68.9	10160102	10160103	1016055	585.5	557.5	568.833	566.833	6	17.6	16.5	1016051
16	19.8	NaN	NaN	NaN	NaN	45.7	74.6	10160111	10160112	1016061	289.5	1126.83	274.833	1128.17	6	17.5	17.9	1016027
16	NaN	NaN	35.5	NaN	NaN	35.5	84.8	1016017	1016018	1016014	556	1335	537	1341	7	15.2	15	1016011
16	NaN	NaN	44.6	NaN	NaN	44.6	75.7	1016032	1016033	1016029	170.167	1177.5	169.5	1160.83	6	15.9	20.6	1016026
16	NaN	NaN	34.2	NaN	NaN	34.2	86.1	1016045	1016046	1016042	651.5	851	636.5	859.5	7	14.9	16.6	1016012
16	NaN	NaN	32	NaN	NaN	32	88.3	1016048	1016049	1016015	790	1218	774	1219.5	7	18.7	15	1016011
16	NaN	NaN	43.3	NaN	NaN	43.3	77	1016069	1016070	1016030	248.833	1127.5	245.5	1110.17	6	17.2	20.6	1016026
16	NaN	NaN	31.2	NaN	NaN	31.2	89.1	1016075	1016076	1016072	749	1233.5	740.5	1261.5	7	17.3	17.7	1016035
16	NaN	NaN	35.3	NaN	NaN	35.3	85	1016078	1016079	1016038	990	1010	971	1007	7	15.4	15.5	1016034
16	NaN	NaN	33.2	NaN	NaN	33.2	87.1	1016081	1016082	1016043	711	1253	693.5	1272.5	7	15.9	16.6	1016012
16	NaN	NaN	34.7	NaN	NaN	34.7	85.6	1016090	1016091	1016088	874.833	697.5	872.167	682.167	7	17.8	16.8	1016085
16	NaN	NaN	35.7	NaN	NaN	35.7	84.6	1016093	1016094	1016089	1070.17	646.167	1062.83	634.833	7	16.8	16.8	1016085
16	NaN	NaN	34	NaN	NaN	34	86.3	1016096	1016097	1016086	593.5	525.5	567.5	530.833	7	16.3	19	1016084
16	NaN	NaN	34.1	NaN	NaN	34.1	86.2	1016099	10160100	1016087	670.833	532.833	655.5	531.5	7	16.2	19	1016084
16	NaN	NaN	35.7	NaN	NaN	35.7	84.6	10160105	10160106	10160102	412.833	554.167	394.833	545.5	7	15.7	17.6	1016055
16	NaN	NaN	34.6	NaN	NaN	34.6	85.7	10160108	10160109	1016058	692.833	176.167	686.167	182.167	7	17.3	17.1	1016054
16	NaN	NaN	25.9	NaN	NaN	25.9	94.4	1016067	1016068	10160111	141.5	949.5	121.5	978.833	7	19.8	17.5	1016061
16	NaN	NaN	29.4	NaN	NaN	29.4	90.9	10160117	10160118	1016073	979.5	1184.17	977.5	1161.5	7	19.1	17.7	1016035
16	NaN	NaN	36.5	NaN	NaN	36.5	83.8	10160120	10160121	10160103	732.5	632	717	623.5	7	14.9	17.6	1016055
17	16	NaN	NaN	NaN	NaN	16.8	5.9	101702	101703	101701	1049	240	1031	243	2	NaN	NaN	1017000
17	NaN	NaN	0.8	NaN	NaN	3.1	21.9	101705	101706	101702	1335.5	380.5	1336.5	357.5	3	16	NaN	101701
18	15.8	NaN	NaN	18.6	NaN	NaN	5.8	101802	101803	101801	193.333	56	169	70	2	NaN	NaN	1018000
18	NaN	NaN	1.8	NaN	NaN	15.4	21.6	101805	101806	101802	1330.17	148.167	1322.17	134.833	3	15.8	NaN	101801
18	15.6	NaN	NaN	NaN	NaN	4.8	24.4	1018011	1018012	101803	946.167	128.833	935.5	112.833	3	18.6	NaN	101801
18	18.2	NaN	NaN	17.2	NaN	NaN	40	1018014	1018015	1018011	905.5	294.167	888.833	296.167	4	15.6	18.6	101803
18	16.5	NaN	NaN	18	NaN	NaN	58.2	1018017	1018018	1018014	759.5	144.167	744.833	134.833	5	18.2	15.6	1018011
18	16.5	NaN	NaN	14.9	NaN	NaN	74.7	1018020	1018021	1018017	772.167	150.167	762.167	143.5	6	16.5	18.2	1018014
18	NaN	NaN	2.3	NaN	NaN	5.7	91.2	1018023	1018024	1018020	655.167	19.5	641.167	26.167	7	16.5	16.5	1018017
18	20.2	NaN	NaN	16.8	NaN	NaN	76.2	1018039	1018040	1018018	736.167	257.5	728.833	236.167	6	18	18.2	1018014
18	17.7	NaN	NaN	16.8	NaN	NaN	57.2	1018030	1018029	1018015	908.833	395.5	913.5	375.5	5	17.2	15.6	1018011
18	15.6	NaN	NaN	16	NaN	NaN	74.9	1018048	1018047	1018030	937.5	416.167	955.5	415.5	6	17.7	17.2	1018015
18	15.8	NaN	NaN	16.6	NaN	NaN	74	1018056	1018057	1018029	973.5	247.5	966.833	228.167	6	16.8	17.2	1018015
18	19.2	NaN	NaN	NaN	28	NaN	89.6	1018044	1018045	1018021	745.5	343.5	723.5	350.833	7	14.9	16.5	1018017
18	18.4	NaN	NaN	19.2	NaN	NaN	90.5	1018050	1018051	1018048	720.167	616.167	701.5	590.167	7	15.6	17.7	1018030
18	17.4	NaN	NaN	17.2	NaN	NaN	90.9	1018053	1018054	1018047	706.833	466.167	682.833	468.833	7	16	17.7	1018030
18	15.9	NaN	NaN	16.5	NaN	NaN	89.8	1018059	1018060	1018056	1030.83	590.167	1020.83	572.167	7	15.8	16.8	1018029
18	17.1	NaN	NaN	15.3	NaN	NaN	90.6	1018062	1018063	1018057	1066.83	145.5	1040.17	157.5	7	16.6	16.8	1018029
18	NaN	NaN	6.6	NaN	NaN	23.9	96.4	1018066	1018067	1018039	701.5	93	679	110	7	20.2	18	1018018
18	16.1	NaN	NaN	17.4	NaN	NaN	93	1018072	1018073	1018040	684.5	209.5	678.5	192	7	16.8	18	1018018
18	NaN	NaN	11.2	NaN	NaN	11.2	109.1	1018075	1018076	1018072	502.5	185	500	204.5	8	16.1	16.8	1018040
18	NaN	NaN	11.5	NaN	NaN	11.5	108.8	1018081	1018082	1018044	558	206.5	548	192.5	8	19.2	14.9	1018021
18	NaN	NaN	11.4	NaN	NaN	11.4	108.9	1018086	1018087	1018050	823	344	818	354	8	18.4	15.6	1018048
18	NaN	NaN	10.6	NaN	NaN	10.6	109.7	1018090	1018091	1018051	597	783.5	581	793.5	8	19.2	15.6	1018048
18	NaN	NaN	12	NaN	NaN	12	108.3	1018094	1018095	1018053	800.5	227	780	219	8	17.4	16	1018047
18	NaN	NaN	14.6	NaN	NaN	14.6	105.7	10180102	10180103	1018059	1007	499	1002.5	484	8	15.9	15.8	1018056
18	NaN	NaN	14	NaN	NaN	14	106.3	10180106	10180107	1018060	791	414	786	401	8	16.5	15.8	1018056
18	NaN	NaN	12.6	NaN	NaN	12.6	107.7	10180111	10180112	1018062	1015.5	282	1008	267	8	17.1	16.6	1018057
18	NaN	NaN	14.4	NaN	NaN	14.4	105.9	10180116	10180117	1018063	1046	296.5	1034.5	307	8	15.3	16.6	1018057
18	NaN	NaN	9.9	NaN	NaN	9.9	110.4	10180120	10180121	1018073	536	176.5	520.5	187.5	8	17.4	16.8	1018040
21	15	NaN	NaN	16.7	NaN	NaN	7.1	102102	102103	102101	245.333	841.333	229.333	856	2	NaN	NaN	1021000
21	17.3	NaN	NaN	17.7	NaN	NaN	22.1	102105	102106	102102	615.5	721.833	603.5	742.5	3	15	NaN	102101
21	16.8	NaN	NaN	17.6	NaN	NaN	23.8	1021011	1021012	102103	502.167	1128.5	511.5	1108.5	3	16.7	NaN	102101
21	15.7	NaN	NaN	15.3	NaN	NaN	40.6	1021014	1021015	1021011	1182.17	842.833	1165.5	834.833	4	16.8	16.7	102103
21	NaN	NaN	4.7	15.9	NaN	NaN	56.3	1021016	1021017	1021014	1312.17	902.167	1306.17	890.167	5	15.7	16.8	1021011
21	18.4	NaN	NaN	17.9	NaN	NaN	72.2	1021020	1021021	1021017	1034.17	764.167	1014.17	765.5	6	15.9	15.7	1021014
21	NaN	8.2	NaN	21	NaN	NaN	39.8	1021026	1021027	102106	817.5	859.5	801	878	4	17.7	15	102102
21	17	NaN	NaN	NaN	7	NaN	60.8	1021031	1021032	1021027	934.5	317	924	335	5	21	17.7	102106
21	15.5	NaN	NaN	15.6	NaN	NaN	77.8	1021034	1021035	1021031	928	234.5	916.5	230.5	6	17	21	1021027
21	17.4	NaN	NaN	18.1	NaN	NaN	39.4	102108	102109	102105	879.167	516.167	873.167	490.833	4	17.3	15	102102
21	14.9	NaN	NaN	NaN	8.2	NaN	56.8	1021039	1021040	102108	755.5	534	739.5	536	5	17.4	17.3	102105
21	NaN	NaN	48.6	NaN	NaN	48.6	71.7	1021042	1021043	1021039	920	714	914	724.5	6	14.9	17.4	102108
21	16.2	NaN	NaN	16.8	NaN	NaN	57.5	1021046	1021047	102109	1056	962.5	1052	943	5	18.1	17.3	102105
21	13.1	NaN	NaN	15.7	NaN	NaN	73.7	1021049	1021050	1021046	951	788.5	933.5	806	6	16.2	18.1	102109
21	17.6	NaN	NaN	19.5	NaN	NaN	41.4	1021054	1021055	1021012	899	1050	895.5	1070.5	4	17.6	16.7	102103
21	17.7	NaN	NaN	15.1	NaN	NaN	59	1021057	1021058	1021054	895.5	1050.5	884	1053.5	5	17.6	17.6	1021012
21	17.1	NaN	NaN	16.8	NaN	NaN	76.7	1021059	1021060	1021057	973.167	916.167	962.5	914.833	6	17.7	17.6	1021054
21	16.9	NaN	NaN	15.4	NaN	NaN	55.9	1021065	1021066	1021015	1061.5	804.167	1055.83	818.167	5	15.3	16.8	1021011
21	16.4	NaN	NaN	17.2	NaN	NaN	72.8	1021068	1021069	1021065	1026.83	939.833	1015.17	920.5	6	16.9	15.3	1021015
21	17.6	NaN	NaN	18.2	NaN	NaN	74.3	1021084	1021085	1021047	1004	915.5	986	912.5	6	16.8	18.1	102109
21	18.3	NaN	NaN	17.3	NaN	NaN	60.9	1021093	1021094	1021055	769	1088.5	763	1075.5	5	19.5	17.6	1021012
21	14.8	NaN	NaN	NaN	NaN	41.1	79.2	1021096	1021097	1021093	843.5	867.5	842.5	850	6	18.3	19.5	1021055
21	15.2	NaN	NaN	15.9	NaN	NaN	74.1	10210102	10210103	1021058	1058.5	991	1041	983.5	6	15.1	17.6	1021054
21	16.3	NaN	NaN	18.8	NaN	NaN	71.3	10210111	10210112	1021066	1167.5	872	1150	868	6	15.4	15.3	1021015
21	NaN	NaN	42.1	NaN	NaN	42.1	78.2	10210123	10210124	1021094	978	959.5	972.5	971	6	17.3	19.5	1021055
21	NaN	NaN	29.7	NaN	NaN	29.7	90.6	1021023	1021024	1021020	755.5	1019.5	744.833	1028.17	7	18.4	15.9	1021017
21	NaN	NaN	27	NaN	NaN	27	93.3	1021036	1021037	1021034	838	232.5	842	216.5	7	15.5	17	1021031
21	NaN	NaN	33.5	NaN	NaN	33.5	86.8	1021051	1021052	1021049	860.5	582	850.5	598.5	7	13.1	16.2	1021046
21	NaN	NaN	26.5	NaN	NaN	26.5	93.8	1021062	1021063	1021059	905.833	1120.83	897.833	1106.83	7	17.1	17.7	1021057
21	NaN	NaN	31.1	NaN	NaN	31.1	89.2	1021071	1021072	1021068	1150.83	1155.17	1131.5	1172.5	7	16.4	16.9	1021065
21	NaN	NaN	30.2	NaN	NaN	30.2	90.1	1021074	1021075	1021021	985	638	963	631	7	17.9	15.9	1021017
21	NaN	NaN	26.9	NaN	NaN	26.9	93.4	1021079	1021080	1021035	657	241.5	647.5	249.5	7	15.6	17	1021031
21	NaN	NaN	28.4	NaN	NaN	28.4	91.9	1021087	1021088	1021084	1094	1164	1070.5	1187	7	17.6	16.8	1021047
21	NaN	NaN	30.9	NaN	NaN	30.9	89.4	1021090	1021091	1021050	920	718	918.5	730.5	7	15.7	16.2	1021046
21	NaN	NaN	26.3	NaN	NaN	26.3	94	1021099	10210100	1021096	1075.5	905	1058	912.5	7	14.8	18.3	1021093
21	NaN	NaN	31	NaN	NaN	31	89.3	10210105	10210106	10210102	1138	1125.5	1125	1126	7	15.2	15.1	1021058
21	NaN	NaN	26.8	NaN	NaN	26.8	93.5	10210108	10210109	1021060	914.5	997	905.5	981.5	7	16.8	17.7	1021057
21	NaN	NaN	32.7	NaN	NaN	32.7	87.6	10210114	10210115	10210111	1240	932	1241.5	954.5	7	16.3	15.4	1021066
21	NaN	NaN	30.3	NaN	NaN	30.3	90	10210117	10210118	1021069	1081	809.5	1065.5	817.5	7	17.2	16.9	1021065
21	NaN	NaN	27.8	NaN	NaN	27.8	92.5	10210120	10210121	1021085	815.5	727.5	801	740	7	18.2	16.8	1021047
21	NaN	NaN	30.3	NaN	NaN	30.3	90	10210128	10210129	10210103	1337.5	1239	1332	1218.5	7	15.9	15.1	1021058
21	NaN	NaN	30.2	NaN	NaN	30.2	90.1	10210131	10210132	10210112	1217.5	866.5	1212	889.5	7	18.8	15.4	1021066
22	17.5	NaN	NaN	17.7	NaN	NaN	6.3	102202	102203	102201	810.667	404	814.667	421.333	2	NaN	NaN	1022000
22	20.6	NaN	NaN	18.4	NaN	NaN	23.8	102205	102206	102202	736	120	724	142.667	3	17.5	NaN	102201
22	20	NaN	NaN	NaN	33.1	NaN	44.4	102208	102209	102205	1221.5	191	1210.5	170.5	4	20.6	17.5	102202
22	22.3	NaN	NaN	18.7	NaN	NaN	64.4	1022011	1022012	102208	992.5	125	990	142	5	20	20.6	102205
22	NaN	NaN	12.3	16.6	NaN	NaN	24	1022016	1022017	102203	1311.83	444.833	1298.17	437.5	3	17.7	NaN	102201
22	NaN	33.9	NaN	14.9	NaN	NaN	42.2	1022021	1022022	102206	928	164	910.5	156	4	18.4	17.5	102202
22	15.6	NaN	NaN	14.2	NaN	NaN	40.6	1022032	1022033	1022017	1278.5	410	1256.5	414	4	16.6	17.7	102203
22	16.5	NaN	NaN	15.9	NaN	NaN	56.2	1022035	1022036	1022032	1083.5	348	1078.5	369	5	15.6	16.6	1022017
22	NaN	NaN	22.1	19	NaN	NaN	72.7	1022038	1022039	1022035	1111.83	80.833	1099.5	71.5	6	16.5	15.6	1022032
22	14.6	NaN	NaN	15.2	NaN	NaN	57.1	1022043	1022044	1022022	1048	110.5	1049	138	5	14.9	18.4	102206
22	18.3	NaN	NaN	18.3	NaN	NaN	71.7	1022046	1022047	1022043	1074.5	202.5	1071	224.5	6	14.6	14.9	1022022
22	14.9	NaN	NaN	18.6	NaN	NaN	54.8	1022053	1022052	1022033	1104.5	332.5	1105	348.5	5	14.2	16.6	1022017
22	17	NaN	NaN	14.8	NaN	NaN	69.7	1022055	1022056	1022053	1114.5	214.5	1108	234	6	14.9	14.2	1022033
22	19.4	NaN	NaN	17.3	NaN	NaN	72.1	1022061	1022062	1022036	1132	553	1125	570.5	6	15.9	15.6	1022032
22	NaN	NaN	6.6	15.6	NaN	NaN	72.3	1022068	1022069	1022044	922.5	126	903	141.5	6	15.2	14.9	1022022
22	NaN	NaN	11.3	18.4	NaN	NaN	73.4	1022076	1022077	1022052	1148.5	429	1137	445	6	18.6	14.2	1022033
22	NaN	NaN	10.6	NaN	NaN	33.6	86.7	1022013	1022014	1022011	1085.5	63.5	1070.5	59.167	6	22.3	20	102208
22	NaN	NaN	37.2	NaN	NaN	37.2	83.1	1022029	1022030	1022012	1007	355.5	995	344.5	6	18.7	20	102208
22	NaN	NaN	8.1	NaN	NaN	5.2	90	1022049	1022050	1022046	883	28.5	865.5	22	7	18.3	14.6	1022043
22	18.3	NaN	NaN	18.3	NaN	NaN	86.7	1022058	1022059	1022055	1038	322.5	1023	331	7	17	14.9	1022053
22	21.3	NaN	NaN	22.9	NaN	NaN	91.5	1022065	1022066	1022061	1300	227	1296.5	248.5	7	19.4	15.9	1022036
22	17.5	NaN	NaN	15.9	NaN	NaN	90	1022073	1022074	1022047	863.5	178	841	194.5	7	18.3	14.6	1022043
22	23.2	NaN	NaN	20.5	NaN	NaN	91.8	1022081	1022082	1022077	913.5	667.5	899.5	667	7	18.4	18.6	1022052
22	NaN	NaN	1.2	NaN	NaN	5.1	84.5	1022084	1022085	1022056	1053	41	1026.5	44	7	14.8	14.9	1022053
22	18.4	NaN	NaN	NaN	22.5	NaN	89.4	1022087	1022088	1022062	1123	641	1100	643	7	17.3	15.9	1022036
22	18.5	NaN	NaN	18.2	NaN	NaN	87.9	1022090	1022091	1022069	760.5	234	740.5	222	7	15.6	15.2	1022044
22	NaN	NaN	28.6	18.4	NaN	NaN	91.7	1022098	1022097	1022039	926.833	243.5	931.5	224.833	7	19	16.5	1022035
22	NaN	NaN	10.2	NaN	NaN	10.2	110.1	10220101	10220102	1022097	909.5	323.5	897.5	326.833	8	18.4	19	1022039
22	NaN	NaN	12.8	NaN	NaN	12.8	107.5	10220106	10220107	1022073	953.5	208.833	941.5	194.833	8	17.5	18.3	1022047
22	NaN	NaN	14.4	NaN	NaN	14.4	105.9	10220110	10220111	1022074	693.5	254.833	669.5	256.167	8	15.9	18.3	1022047
22	NaN	NaN	15.3	NaN	NaN	15.3	105	10220117	10220118	1022058	1174.17	487.5	1169.5	502.833	8	18.3	17	1022055
22	NaN	NaN	15.3	NaN	NaN	15.3	105	10220121	10220122	1022059	1146.83	126.167	1123.5	124.833	8	18.3	17	1022055
22	NaN	NaN	7.5	NaN	NaN	7.5	112.8	10220124	10220125	1022065	1184.17	190.833	1177.5	170.833	8	21.3	19.4	1022061
22	NaN	NaN	5.9	NaN	NaN	5.9	114.4	10220129	10220130	1022066	1301.17	136.833	1297.83	119.5	8	22.9	19.4	1022061
22	NaN	NaN	5.3	NaN	NaN	5.3	115	10220134	10220135	1022081	788.5	581.167	775.167	573.167	8	23.2	18.4	1022077
22	NaN	NaN	8	NaN	NaN	8	112.3	10220139	10220140	1022082	1029.83	782.5	1017.83	793.833	8	20.5	18.4	1022077
22	NaN	NaN	12.5	NaN	NaN	12.5	107.8	10220146	10220147	1022087	1174	763	1157.5	780	8	18.4	17.3	1022062
22	NaN	NaN	13.9	NaN	NaN	13.9	106.4	10220151	10220152	1022090	917.167	53.5	913.833	24.833	8	18.5	15.6	1022069
22	NaN	NaN	14.2	NaN	NaN	14.2	106.1	10220155	10220156	1022091	730.5	217.5	712.5	208.833	8	18.2	15.6	1022069
23	14.9	NaN	NaN	16.7	NaN	NaN	4.6	102302	102303	102301	50	1257.5	47	1279	2	NaN	NaN	1023000
23	15.7	NaN	NaN	17.9	NaN	NaN	19.5	102305	102306	102302	738	1177.5	731.5	1154	3	14.9	NaN	102301
23	NaN	26	NaN	NaN	27.8	NaN	35.2	102308	102309	102305	629.5	1111	620.5	1117.5	4	15.7	14.9	102302
23	20	NaN	NaN	19.4	NaN	NaN	21.3	1023013	1023014	102303	1206	972.5	1198	982.5	3	16.7	NaN	102301
23	20.5	NaN	NaN	20.6	NaN	NaN	41.3	1023016	1023017	1023013	1221.5	854.5	1204	851	4	20	16.7	102303
23	15.4	NaN	NaN	15.4	NaN	NaN	61.8	1023019	1023020	1023016	1238	1012	1226	1013.5	5	20.5	20	1023013
23	17.5	NaN	NaN	NaN	NaN	12.2	77.2	1023022	1023023	1023019	1229	1172.5	1212.5	1180.5	6	15.4	20.5	1023016
23	NaN	NaN	11.3	19.7	NaN	NaN	37.4	1023028	1023029	102306	724	1255	705.5	1241.5	4	17.9	14.9	102302
23	18.2	NaN	NaN	19.1	NaN	NaN	40.7	1023034	1023035	1023014	1178.17	1167.17	1170	1183	4	19.4	16.7	102303
23	NaN	NaN	9.1	16.1	NaN	NaN	58.9	1023037	1023038	1023034	1235.5	1070.5	1222	1086.5	5	18.2	19.4	1023014
23	16.4	NaN	NaN	15.9	NaN	NaN	61.9	1023042	1023043	1023017	1168.5	812.5	1152.5	820	5	20.6	20	1023013
23	13.7	NaN	NaN	14.1	NaN	NaN	78.3	1023045	1023046	1023042	1057	910	1040	898	6	16.4	20.6	1023017
23	NaN	NaN	12.9	NaN	NaN	13.9	77.2	1023050	1023051	1023020	1172	823	1164	803	6	15.4	20.5	1023016
23	14.9	NaN	NaN	14.2	NaN	NaN	57.1	1023057	1023058	1023029	690.5	1280.17	680.167	1289.83	5	19.7	17.9	102306
23	NaN	NaN	2.3	NaN	NaN	3.8	71.3	1023063	1023064	1023058	745.5	1321.17	727.5	1343.83	6	14.2	19.7	1023029
23	14	NaN	NaN	16	NaN	NaN	59.8	1023068	1023069	1023035	1166.5	1196	1148.5	1202	5	19.1	19.4	1023014
23	16.3	NaN	NaN	17.9	NaN	NaN	73.8	1023071	1023072	1023068	1239.5	1213.5	1221	1215	6	14	19.1	1023035
23	NaN	NaN	2.2	NaN	NaN	3.8	90.1	1023073	1023074	1023071	1343	1327.5	1338.5	1340.5	7	16.3	14	1023068
23	14.3	NaN	NaN	15.5	NaN	NaN	75	1023078	1023079	1023038	1206	951	1194	966	6	16.1	18.2	1023034
23	NaN	NaN	42.5	NaN	NaN	42.5	77.8	1023084	1023085	1023043	1148.17	1131.17	1131.83	1119.83	6	15.9	20.6	1023017
23	12.9	NaN	NaN	15.6	NaN	NaN	72	1023060	1023061	1023057	810.5	1264.17	788.833	1266.83	6	14.9	19.7	1023029
23	18.5	NaN	NaN	17.3	NaN	NaN	75.8	1023097	1023098	1023069	1116.5	1202.83	1100.5	1201.17	6	16	19.1	1023035
23	NaN	NaN	25.6	NaN	NaN	25.6	94.7	1023025	1023026	1023022	1343	1190	1333.5	1199.5	7	17.5	15.4	1023019
23	18.2	NaN	NaN	17.7	NaN	NaN	92	1023047	1023048	1023045	1129.5	1007	1108	1017	7	13.7	16.4	1023042
23	NaN	NaN	31	NaN	NaN	31	89.3	1023081	1023082	1023078	1247.83	1085.5	1241.17	1071.17	7	14.3	16.1	1023038
23	19.6	NaN	NaN	17.7	NaN	NaN	92.4	1023088	1023089	1023046	814.5	773.833	806.833	784.5	7	14.1	16.4	1023042
23	NaN	NaN	35.4	NaN	NaN	35.4	84.9	1023091	1023092	1023060	787.167	1147.83	770.5	1142.17	7	12.9	14.9	1023057
23	NaN	NaN	32.7	NaN	NaN	32.7	87.6	1023094	1023095	1023061	729.167	1196.5	715.833	1190.5	7	15.6	14.9	1023057
23	NaN	NaN	26	NaN	NaN	26	94.3	1023099	10230100	1023097	1025.83	1306.5	1011.17	1302.17	7	18.5	16	1023069
23	NaN	NaN	27.2	NaN	NaN	27.2	93.1	10230101	10230102	1023098	991.5	1099.83	979.833	1105.83	7	17.3	16	1023069
23	NaN	NaN	28.6	NaN	NaN	28.6	91.7	10230104	10230105	1023072	1144.83	1289.5	1137.5	1297.5	7	17.9	14	1023068
23	NaN	NaN	29.8	NaN	NaN	29.8	90.5	10230107	10230108	1023079	1167.5	977.5	1146.17	962.5	7	15.5	16.1	1023038
23	NaN	NaN	10.1	NaN	NaN	10.1	110.2	10230110	10230109	1023047	1296.5	1034.5	1313	1042	8	18.2	13.7	1023045
23	NaN	NaN	10.6	NaN	NaN	10.6	109.7	10230111	10230112	1023048	1067.5	1024.5	1073	1047	8	17.7	13.7	1023045
23	NaN	NaN	8.3	NaN	NaN	8.3	112	10230113	10230114	1023088	809.5	626.5	790.5	629	8	19.6	14.1	1023046
23	NaN	NaN	10.2	NaN	NaN	10.2	110.1	10230115	10230116	1023089	843	822.5	837	840.5	8	17.7	14.1	1023046
24	15.1	NaN	NaN	16.2	NaN	NaN	10.7	102402	102403	102401	386.167	606.167	376.833	588.833	2	NaN	NaN	1024000
24	21.3	NaN	NaN	22.6	NaN	NaN	25.8	102405	102406	102402	544.833	735.5	512.167	728.167	3	15.1	NaN	102401
24	34.6	NaN	NaN	NaN	NaN	73.2	47.1	102408	102409	102405	632.5	961.5	625.5	970.5	4	21.3	15.1	102402
24	25	NaN	NaN	21.2	NaN	NaN	26.9	1024014	1024015	102403	561.167	544.167	543.167	540.833	3	16.2	NaN	102401
24	20.9	NaN	NaN	19.2	NaN	NaN	51.9	1024017	1024018	1024014	888.5	513.167	869.833	507.167	4	25	16.2	102403
24	15.9	NaN	NaN	18.1	NaN	NaN	48.4	1024023	1024024	102406	527.833	954.833	518.5	956.167	4	22.6	15.1	102402
24	17.5	NaN	NaN	18	NaN	NaN	64.3	1024026	1024027	1024023	570.5	929.5	552.5	931.5	5	15.9	22.6	102406
24	17.2	NaN	NaN	18.3	NaN	NaN	48.1	1024034	1024033	1024015	481.5	459	481.5	478.5	4	21.2	16.2	102403
24	16.8	NaN	NaN	16.1	NaN	NaN	65.3	1024036	1024037	1024034	592.5	237.5	577.5	224	5	17.2	21.2	1024015
24	NaN	NaN	3.7	18.1	NaN	NaN	82.1	1024039	1024040	1024036	500.5	116.5	491.5	100.5	6	16.8	17.2	1024034
24	16.1	NaN	NaN	21.6	NaN	NaN	71.1	1024043	1024044	1024018	831.5	422.5	808	413	5	19.2	25	1024014
24	16.8	NaN	NaN	17.6	NaN	NaN	66.5	1024049	1024050	1024024	456.5	976	454	947.5	5	18.1	22.6	102406
24	17.8	NaN	NaN	16.8	NaN	NaN	66.4	1024058	1024059	1024033	386.5	615	377.5	595	5	18.3	21.2	1024015
24	NaN	9.8	NaN	NaN	9.8	NaN	81.7	1024011	1024012	102408	931	825	925.5	802.5	5	34.6	21.3	102405
24	NaN	NaN	47.5	NaN	NaN	47.5	72.8	1024020	1024021	1024017	899.167	545.833	883.167	535.167	5	20.9	25	1024014
24	22.5	NaN	NaN	18.4	NaN	NaN	81.8	1024029	1024030	1024026	483.167	1066.17	472.5	1056.83	6	17.5	15.9	1024023
24	NaN	NaN	33.1	22.5	NaN	NaN	87.2	1024046	1024047	1024043	657.5	454	634	446	6	16.1	19.2	1024018
24	NaN	7.5	NaN	22.7	NaN	NaN	83.3	1024052	1024053	1024049	452	1110	455	1083.5	6	16.8	18.1	1024024
24	17.1	NaN	NaN	NaN	37.3	NaN	82.3	1024055	1024056	1024027	385.5	863	365	867	6	18	15.9	1024023
24	NaN	NaN	36.1	34.3	NaN	NaN	84.2	1024061	1024062	1024058	194	599	178.5	599.5	6	17.8	18.3	1024033
24	NaN	NaN	4.3	NaN	NaN	4.3	81.4	1024064	1024065	1024037	556.5	353.5	536	340	6	16.1	17.2	1024034
24	NaN	NaN	36.2	NaN	NaN	36.2	84.1	1024067	1024068	1024050	449	823	446.5	829.5	6	17.6	18.1	1024024
24	NaN	NaN	27.6	NaN	NaN	27.6	92.7	1024070	1024071	1024044	885	267.5	881	283.5	6	21.6	19.2	1024018
24	19.1	NaN	NaN	NaN	NaN	16.2	83.2	1024073	1024074	1024059	306.5	783.833	287.5	787.167	6	16.8	18.3	1024033
24	NaN	NaN	16	NaN	NaN	16	104.3	1024080	1024081	1024029	540	1234	534	1253.5	7	22.5	17.5	1024026
24	NaN	NaN	20.1	NaN	NaN	20.1	100.2	1024086	1024085	1024030	211	927.5	230	917	7	18.4	17.5	1024026
24	NaN	NaN	1.5	NaN	NaN	1.5	100.2	1024091	1024092	1024040	363	141.5	365.5	127.5	7	18.1	16.8	1024036
24	NaN	NaN	10.6	NaN	NaN	10.6	109.7	1024095	1024096	1024047	715.5	307.5	717.5	319.5	7	22.5	16.1	1024043
24	NaN	NaN	14.3	NaN	NaN	14.3	106	10240100	10240101	1024053	635	1294.5	622.5	1282	7	22.7	16.8	1024049
24	NaN	NaN	20.9	NaN	NaN	20.9	99.4	10240105	10240106	1024055	404	916.5	398	928.5	7	17.1	18	1024027
24	NaN	NaN	1.8	NaN	NaN	1.8	118.5	10240114	10240115	1024062	426.5	611.5	412	602	7	34.3	17.8	1024058
24	NaN	NaN	18	NaN	NaN	18	102.3	10240124	10240125	1024073	120.167	706.167	115.5	698.167	7	19.1	16.8	1024059
25	17	NaN	NaN	15.3	NaN	NaN	12	102502	102503	102501	741	871	746	894	2	NaN	NaN	1025000
25	14.5	NaN	NaN	15.6	NaN	NaN	29	102505	102506	102502	895.5	923.167	877.5	948.5	3	17	NaN	102501
25	18.3	NaN	NaN	19.6	NaN	NaN	43.5	102508	102509	102505	914.167	1053.17	908.167	1023.17	4	14.5	17	102502
25	17.9	NaN	NaN	16	NaN	NaN	61.8	1025011	1025012	102508	1078.67	892	1062.67	910.667	5	18.3	14.5	102505
25	NaN	NaN	40.6	NaN	NaN	40.6	79.7	1025014	1025015	1025011	1150.83	1008.83	1147.5	1027.5	6	17.9	18.3	102508
25	19.4	NaN	NaN	16.1	NaN	NaN	44.6	1025019	1025020	102506	941	1040.5	931.5	1055	4	15.6	17	102502
25	17.8	NaN	NaN	16.8	NaN	NaN	63.1	1025028	1025029	102509	925	1058.5	907.5	1068.5	5	19.6	14.5	102505
25	14.9	NaN	NaN	NaN	NaN	42.5	77.8	1025034	1025035	1025012	1185.5	964	1187.5	984.5	6	16	18.3	102508
25	NaN	NaN	15.6	17.3	NaN	NaN	27.3	1025040	1025041	102503	983.5	632.833	975.5	652.167	3	15.3	NaN	102501
25	19.5	NaN	NaN	17.8	NaN	NaN	44.6	1025050	1025051	1025041	803	769	796	762.5	4	17.3	15.3	102503
25	18.4	NaN	NaN	16.2	NaN	NaN	64.1	1025053	1025054	1025050	914.5	998	913	1015	5	19.5	17.3	1025041
25	16.2	NaN	NaN	15	NaN	NaN	62.4	1025059	1025060	1025051	598.5	882.5	590.5	901	5	17.8	17.3	1025041
25	NaN	NaN	41.7	NaN	NaN	41.7	78.6	1025062	1025063	1025059	747.5	1088	729	1081	6	16.2	17.8	1025051
25	NaN	NaN	42.9	NaN	NaN	42.9	77.4	1025070	1025071	1025060	664.5	1069	642.5	1067	6	15	17.8	1025051
25	16.6	NaN	NaN	20.3	NaN	NaN	64	1025022	1025023	1025019	814.5	1179.5	791	1182	5	19.4	15.6	102506
25	14.4	NaN	NaN	16.5	NaN	NaN	60.7	1025025	1025026	1025020	1139.5	1109.5	1128.5	1093	5	16.1	15.6	102506
25	16	NaN	NaN	17.9	NaN	NaN	75.1	1025081	1025082	1025025	1012.5	1063.5	1001.5	1044.5	6	14.4	16.1	1025020
25	NaN	NaN	43.1	NaN	NaN	43.1	77.2	1025087	1025088	1025026	841	1080.5	838	1063.5	6	16.5	16.1	1025020
25	NaN	NaN	27.3	NaN	NaN	27.3	93	1025092	1025093	1025082	1324	1167	1309.5	1179	7	17.9	14.4	1025025
25	NaN	NaN	39.4	NaN	NaN	39.4	80.9	1025031	1025032	1025028	658	1008.5	659.5	993.5	6	17.8	19.6	102509
25	NaN	NaN	27.6	NaN	NaN	27.6	92.7	1025037	1025038	1025034	1271	751.5	1258	764.5	7	14.9	16	1025012
25	NaN	NaN	40.4	NaN	NaN	40.4	79.9	1025045	1025046	1025029	824.5	999.5	820.5	979.5	6	16.8	19.6	102509
25	NaN	NaN	37.8	NaN	NaN	37.8	82.5	1025056	1025057	1025053	944.5	956	926.5	955.5	6	18.4	19.5	1025050
25	NaN	NaN	40	NaN	NaN	40	80.3	1025067	1025068	1025054	761.5	786.5	740.5	792.5	6	16.2	19.5	1025050
25	NaN	NaN	39.7	NaN	NaN	39.7	80.6	1025075	1025076	1025022	469.5	1328	468	1311	6	16.6	19.4	1025019
25	NaN	NaN	36	NaN	NaN	36	84.3	1025078	1025079	1025023	834.5	1120	815.5	1107	6	20.3	19.4	1025019
25	NaN	NaN	29.2	NaN	NaN	29.2	91.1	1025084	1025085	1025081	812.5	913.5	797.5	929	7	16	14.4	1025025
26	17.3	NaN	NaN	18.4	NaN	NaN	12	102602	102603	102601	453.167	1045.5	435.167	1051.5	2	NaN	NaN	1026000
26	19.3	NaN	NaN	15.9	NaN	NaN	29.3	102605	102606	102602	634.167	858.5	632.833	835.167	3	17.3	NaN	102601
26	18.3	NaN	NaN	19.9	NaN	NaN	48.6	102608	102609	102605	489.5	1038.5	494.833	1063.17	4	19.3	17.3	102602
26	18.7	NaN	NaN	16.9	NaN	NaN	66.9	1026011	1026012	102608	595.5	954.5	591.5	967.167	5	18.3	19.3	102605
26	14.3	NaN	NaN	15.6	NaN	NaN	30.4	1026017	1026018	102603	733.333	1193.33	732	1225.33	3	18.4	NaN	102601
26	15.9	NaN	NaN	NaN	29.5	NaN	44.7	1026020	1026021	1026017	725.167	1056.83	704.5	1044.17	4	14.3	18.4	102603
26	16.1	NaN	NaN	15.2	NaN	NaN	45.2	1026028	1026029	102606	610.167	884.5	586.833	885.833	4	15.9	17.3	102602
26	21	NaN	NaN	14.5	NaN	NaN	61.3	1026031	1026032	1026028	841.833	902.167	829.833	882.833	5	16.1	15.9	102606
26	16.5	NaN	NaN	18.2	NaN	NaN	68.5	1026037	1026038	102609	606.167	1034.83	603.5	1013.5	5	19.9	19.3	102605
26	NaN	NaN	7	18.8	NaN	NaN	46	1026046	1026047	1026018	507.5	1271	506	1288.5	4	15.6	18.4	102603
26	15.9	NaN	NaN	14.3	NaN	NaN	64.8	1026050	1026051	1026047	480	1202.5	463	1207.5	5	18.8	15.6	1026018
26	NaN	NaN	1.3	NaN	NaN	1.3	80.7	1026052	1026053	1026050	480.5	1314	465.5	1310	6	15.9	18.8	1026047
26	15.2	NaN	NaN	16.5	NaN	NaN	60.4	1026056	1026057	1026029	623	835.5	607	828.5	5	15.2	15.9	102606
26	17.5	NaN	NaN	16.9	NaN	NaN	75.6	1026059	1026060	1026056	662.5	959.5	643.5	956.5	6	15.2	15.2	1026029
26	20.2	NaN	NaN	NaN	NaN	6.5	60.6	1026023	1026024	1026020	1178.17	1033.5	1159.5	1024.17	5	15.9	14.3	1026017
26	NaN	NaN	44.5	NaN	NaN	44.5	75.8	1026069	1026070	1026032	847.167	922.833	829.833	917.5	6	14.5	16.1	1026028
26	NaN	NaN	7.1	NaN	NaN	41.2	79.1	1026077	1026078	1026051	429.5	1290.83	423.5	1305.83	6	14.3	18.8	1026047
26	16.7	NaN	NaN	16.8	NaN	NaN	76.9	1026083	1026084	1026057	653.5	634.5	638.5	614.5	6	16.5	15.2	1026029
26	NaN	NaN	34.7	NaN	NaN	34.7	85.6	1026014	1026015	1026011	488.833	1001.83	470.167	995.167	6	18.7	18.3	102608
26	NaN	NaN	38	NaN	NaN	38	82.3	1026034	1026035	1026031	898.5	836.833	889.833	823.5	6	21	16.1	1026028
26	NaN	NaN	35.3	NaN	NaN	35.3	85	1026040	1026041	1026037	571	1072	555.5	1068.5	6	16.5	19.9	102609
26	NaN	NaN	36.5	NaN	NaN	36.5	83.8	1026043	1026044	1026012	684	1035	671.5	1053	6	16.9	18.3	102608
26	NaN	NaN	27.2	NaN	NaN	27.2	93.1	1026062	1026063	1026059	752.5	1239.5	734.5	1237	7	17.5	15.2	1026056
26	NaN	NaN	39.5	NaN	NaN	39.5	80.8	1026065	1026066	1026023	1293.5	1153	1266	1160	6	20.2	15.9	1026020
26	NaN	NaN	33.6	NaN	NaN	33.6	86.7	1026074	1026075	1026038	629.5	996	613.5	987.5	6	18.2	19.9	102609
26	NaN	NaN	26.7	NaN	NaN	26.7	93.6	1026086	1026087	1026083	888.5	688.5	875.5	676	7	16.7	16.5	1026057
26	NaN	NaN	26.6	NaN	NaN	26.6	93.7	1026089	1026090	1026084	598.5	369.5	591.5	351.5	7	16.8	16.5	1026057
26	NaN	NaN	27.8	NaN	NaN	27.8	92.5	1026092	1026093	1026060	193.833	856.167	175.5	858.833	7	16.9	15.2	1026056
27	NaN	NaN	10.7	19	NaN	NaN	6	102702	102703	102701	669.333	200	653.333	210.667	2	NaN	NaN	1027000
27	NaN	41.2	NaN	18.3	NaN	NaN	25	102707	102708	102703	682	716.5	668	695.5	3	19	NaN	102701
27	15.1	NaN	NaN	15.2	NaN	NaN	43.3	1027012	1027013	102708	805.5	733.5	789.5	751.5	4	18.3	19	102703
27	15.5	NaN	NaN	18.4	NaN	NaN	58.4	1027015	1027016	1027012	832	885.5	818.5	871.5	5	15.1	18.3	102708
27	15.7	NaN	NaN	15.4	NaN	NaN	73.9	1027018	1027019	1027015	861.5	656.5	848.5	653	6	15.5	15.1	1027012
27	16.2	NaN	NaN	14.9	NaN	NaN	58.5	1027024	1027025	1027013	1056	705	1054.5	688.5	5	15.2	18.3	102708
27	18.9	NaN	NaN	18.6	NaN	NaN	74.7	1027027	1027028	1027024	954	668	944	662.5	6	16.2	15.2	1027013
27	17.6	NaN	NaN	18.6	NaN	NaN	76.8	1027033	1027034	1027016	1054	895	1044.5	888	6	18.4	15.1	1027012
27	15	NaN	NaN	14.4	NaN	NaN	73.4	1027042	1027043	1027025	1124	782	1115.5	794.5	6	14.9	15.2	1027013
27	19.5	NaN	NaN	18.4	NaN	NaN	89.6	1027021	1027022	1027018	1055	644.5	1048	659.5	7	15.7	15.5	1027015
27	NaN	NaN	26.7	NaN	NaN	26.7	93.6	1027030	1027031	1027027	983.5	619	965	627	7	18.9	16.2	1027024
27	16.7	NaN	NaN	14.7	NaN	NaN	94.4	1027036	1027037	1027033	1148	809.5	1123	804	7	17.6	18.4	1027016
27	16.3	NaN	NaN	18.8	NaN	NaN	89.3	1027039	1027040	1027019	706	748	685.5	739	7	15.4	15.5	1027015
27	17.3	NaN	NaN	16.2	NaN	NaN	88.4	1027045	1027046	1027042	1137	972.5	1124	987.5	7	15	14.9	1027025
27	16.5	NaN	NaN	16.9	NaN	NaN	93.3	1027048	1027049	1027028	1084	596	1063.5	596.5	7	18.6	16.2	1027024
27	16.9	NaN	NaN	18	NaN	NaN	87.8	1027053	1027054	1027043	1045.5	741.5	1034	758	7	14.4	14.9	1027025
27	NaN	NaN	11.2	NaN	NaN	11.2	109.1	1027057	1027058	1027021	1066	722.5	1051.5	715	8	19.5	15.7	1027018
27	NaN	NaN	12.3	NaN	NaN	12.3	108	1027062	1027063	1027022	1058	205	1043	207	8	18.4	15.7	1027018
27	NaN	NaN	9.2	NaN	NaN	9.2	111.1	1027067	1027068	1027036	1230.5	820.5	1229	831	8	16.7	17.6	1027033
27	NaN	NaN	11.2	NaN	NaN	11.2	109.1	1027072	1027073	1027037	1072.5	765.5	1058.5	759	8	14.7	17.6	1027033
27	NaN	NaN	14.7	NaN	NaN	14.7	105.6	1027077	1027078	1027039	537.5	577.5	520	567	8	16.3	15.4	1027019
27	NaN	NaN	12.2	NaN	NaN	12.2	108.1	1027081	1027082	1027040	439	757.5	428	744	8	18.8	15.4	1027019
27	NaN	NaN	14.6	NaN	NaN	14.6	105.7	1027085	1027086	1027045	1012	789	1001.5	807	8	17.3	15	1027042
27	NaN	NaN	15.7	NaN	NaN	15.7	104.6	1027089	1027090	1027046	1109.5	1232.5	1095	1253	8	16.2	15	1027042
27	NaN	NaN	10.5	NaN	NaN	10.5	109.8	1027094	1027095	1027048	1094	580.5	1090.5	561	8	16.5	18.6	1027028
27	NaN	NaN	10.1	NaN	NaN	10.1	110.2	1027098	1027099	1027049	1261.5	571	1257	592	8	16.9	18.6	1027028
27	NaN	NaN	15.6	NaN	NaN	15.6	104.7	10270102	10270103	1027053	1063	664	1049.5	671.5	8	16.9	14.4	1027043
27	NaN	NaN	14.5	NaN	NaN	14.5	105.8	10270106	10270107	1027054	743.5	628	741	606	8	18	14.4	1027043
27	15.8	NaN	NaN	16.3	NaN	NaN	95.4	10270109	10270110	1027034	1070	1002	1066	975.5	7	18.6	18.4	1027016
27	NaN	NaN	9.1	NaN	NaN	9.1	111.2	10270112	10270113	10270109	1201	901	1177	906.5	8	15.8	18.6	1027034
27	NaN	NaN	8.6	NaN	NaN	8.6	111.7	10270117	10270118	10270110	1164	858	1153.5	850	8	16.3	18.6	1027034
28	17.6	NaN	NaN	14.9	NaN	NaN	7.4	102802	102803	102801	412	952	404	973.333	2	NaN	NaN	1028000
28	18.4	NaN	NaN	17.4	NaN	NaN	25	102805	102806	102802	558.5	866.5	549.833	851.833	3	17.6	NaN	102801
28	15	NaN	NaN	15.8	NaN	NaN	43.4	102808	102809	102805	679.833	852.5	667.167	855.167	4	18.4	17.6	102802
28	16.5	NaN	NaN	15.9	NaN	NaN	58.4	1028011	1028012	102808	541.833	759.167	528.5	768.5	5	15	18.4	102805
28	17.4	NaN	NaN	17.7	NaN	NaN	74.9	1028013	1028014	1028011	650.5	835.167	621.833	831.833	6	16.5	15	102808
28	15.2	NaN	NaN	15.6	NaN	NaN	22.3	1028019	1028020	102803	443.833	854.5	422.5	849.833	3	14.9	NaN	102801
28	15.2	NaN	NaN	19.6	NaN	NaN	37.5	1028022	1028023	1028019	381.167	905.167	381.167	879.833	4	15.2	14.9	102803
28	16.3	NaN	NaN	14.4	NaN	NaN	52.7	1028025	1028026	1028022	430.5	1107.17	415.833	1118.5	5	15.2	15.2	1028019
28	16	NaN	NaN	16.9	NaN	NaN	69	1028028	1028029	1028025	587.167	904.833	585.167	877.5	6	16.3	15.2	1028022
28	15.9	NaN	NaN	13.4	NaN	NaN	42.4	1028034	1028035	102806	490.5	1106.83	486.5	1089.5	4	17.4	17.6	102802
28	14.2	NaN	NaN	16.8	NaN	NaN	58.3	1028037	1028038	1028034	467.833	1172.83	458.5	1192.83	5	15.9	17.4	102806
28	14.6	NaN	NaN	15.8	NaN	NaN	72.5	1028040	1028041	1028037	364.5	1005.5	365.167	985.5	6	14.2	15.9	1028034
28	14.8	NaN	NaN	14.1	NaN	NaN	59.2	1028045	1028046	102809	532.5	999.167	517.833	987.833	5	15.8	18.4	102805
28	17.3	NaN	NaN	18.4	NaN	NaN	74	1028048	1028049	1028045	489.167	1135.17	485.833	1114.5	6	14.8	15.8	102809
28	18.9	NaN	NaN	18.6	NaN	NaN	74.3	1028054	1028055	1028012	538.167	840.167	529.5	830.833	6	15.9	15	102808
28	NaN	NaN	5	14.9	NaN	NaN	37.9	1028063	1028064	1028020	153.167	890.167	143.833	871.5	4	15.6	14.9	102803
28	14.9	NaN	NaN	NaN	NaN	13.4	52.8	1028067	1028068	1028064	64.833	920.167	47.5	902.167	5	14.9	15.6	1028020
28	17	NaN	NaN	14.9	NaN	NaN	67.7	1028070	1028071	1028067	145.5	830.167	147.5	810.833	6	14.9	14.9	1028064
28	14.9	NaN	NaN	14.7	NaN	NaN	57.1	1028075	1028076	1028023	408.167	990.167	410.833	976.167	5	19.6	15.2	1028019
28	16.1	NaN	NaN	31.9	NaN	NaN	72	1028078	1028079	1028075	227.5	1082.83	209.5	1100.17	6	14.9	19.6	1028023
28	15.9	NaN	NaN	17.4	NaN	NaN	67.1	1028086	1028087	1028026	639.5	951.833	632.833	929.833	6	14.4	15.2	1028022
28	16.7	NaN	NaN	17.5	NaN	NaN	55.8	1028095	1028096	1028035	447.167	977.5	446.5	959.5	5	13.4	17.4	102806
28	20	NaN	NaN	16.7	NaN	NaN	72.5	1028098	1028099	1028095	552.5	1173.5	532.5	1150.17	6	16.7	13.4	1028035
28	19	NaN	NaN	16.9	NaN	NaN	75.1	10280105	10280106	1028038	449.167	1142.17	415.167	1124.83	6	16.8	15.9	1028034
28	17.1	NaN	NaN	15.9	NaN	NaN	73.3	10280114	10280115	1028046	396.833	1150.17	375.5	1154.17	6	14.1	15.8	102809
28	17.9	NaN	NaN	16.9	NaN	NaN	71.8	10280129	10280130	1028076	445.5	1013.17	430.167	1004.5	6	14.7	19.6	1028023
28	18	NaN	NaN	17.8	NaN	NaN	73.3	10280140	10280141	1028096	356.833	1070.17	341.5	1088.83	6	17.5	13.4	1028035
28	16.1	NaN	NaN	17.3	NaN	NaN	92.3	1028016	1028017	1028013	534.5	1017.83	534.5	994.5	7	17.4	16.5	1028011
28	17.6	NaN	NaN	16.8	NaN	NaN	85	1028031	1028032	1028028	581.833	979.5	564.5	972.167	7	16	16.3	1028025
28	13.8	NaN	NaN	15.9	NaN	NaN	87.1	1028042	1028043	1028040	367.833	986.833	349.167	988.167	7	14.6	14.2	1028037
28	17.1	NaN	NaN	14.5	NaN	NaN	91.3	1028051	1028052	1028048	585.167	821.5	571.167	814.833	7	17.3	14.8	1028045
28	16.7	NaN	NaN	18	NaN	NaN	93.2	1028057	1028058	1028054	460.833	962.833	429.5	962.833	7	18.9	15.9	1028012
28	15.3	NaN	NaN	18.5	NaN	NaN	92.6	1028060	1028061	1028014	505.5	673.5	477.5	669.5	7	17.7	16.5	1028011
28	17.4	NaN	NaN	15.3	NaN	NaN	84.7	1028072	1028073	1028070	222.167	748.167	208.167	734.833	7	17	14.9	1028067
28	17	NaN	NaN	NaN	NaN	32.2	88.1	1028081	1028082	1028078	198.167	1039.5	181.5	1040.17	7	16.1	14.9	1028075
28	NaN	NaN	37.3	NaN	NaN	37.3	83	1028089	1028090	1028086	529.833	968.167	535.833	946.167	7	15.9	14.4	1028026
28	NaN	NaN	34.4	NaN	NaN	34.4	85.9	1028092	1028093	1028029	568.5	1196.17	555.167	1200.17	7	16.9	16.3	1028025
28	NaN	NaN	27.8	NaN	NaN	27.8	92.5	10280100	10280101	1028098	530.5	1128.83	527.833	1148.83	7	20	16.7	1028095
28	NaN	NaN	31.1	NaN	NaN	31.1	89.2	10280102	10280103	1028099	461.167	1156.17	453.167	1140.17	7	16.7	16.7	1028095
28	NaN	NaN	26.2	NaN	NaN	26.2	94.1	10280108	10280109	10280105	247.5	1059.5	238.833	1037.5	7	19	16.8	1028038
28	NaN	NaN	32	NaN	NaN	32	88.3	10280111	10280112	1028041	416.167	926.167	412.167	916.833	7	15.8	14.2	1028037
28	NaN	NaN	29.9	NaN	NaN	29.9	90.4	10280117	10280118	10280114	571.5	1218.83	569.5	1198.17	7	17.1	14.1	1028046
28	NaN	NaN	27.9	NaN	NaN	27.9	92.4	10280120	10280121	1028049	577.5	1091.5	566.167	1108.83	7	18.4	14.8	1028045
28	NaN	NaN	27.4	NaN	NaN	27.4	92.9	10280123	10280124	1028055	708.167	1027.17	698.167	1039.17	7	18.6	15.9	1028012
28	NaN	NaN	37.7	NaN	NaN	37.7	82.6	10280126	10280127	1028071	292.167	818.5	276.833	804.5	7	14.9	14.9	1028067
28	NaN	NaN	30.6	NaN	NaN	30.6	89.7	10280132	10280133	10280129	700.167	1082.83	682.833	1074.17	7	17.9	14.7	1028076
28	NaN	NaN	35.8	NaN	NaN	35.8	84.5	10280137	10280138	1028087	739.5	994.167	721.5	971.5	7	17.4	14.4	1028026
28	17.1	NaN	NaN	18.2	NaN	NaN	91.3	10280143	10280144	10280140	403.5	1018.17	396.167	999.5	7	18	17.5	1028096
28	NaN	NaN	28.3	NaN	NaN	28.3	92	10280146	10280147	10280106	330.833	1227.5	299.5	1244.17	7	16.9	16.8	1028038
28	16.6	NaN	NaN	NaN	NaN	31.1	89.2	10280149	10280150	10280115	497.5	976.833	471.5	975.5	7	15.9	14.1	1028046
28	NaN	NaN	31.6	NaN	NaN	31.6	88.7	10280152	10280153	10280130	390.167	894.833	371.5	884.833	7	16.9	14.7	1028076
28	NaN	NaN	29.2	NaN	NaN	29.2	91.1	10280155	10280156	10280141	427.5	1076.83	412.167	1075.5	7	17.8	17.5	1028096
28	NaN	NaN	16.4	NaN	NaN	13.9	103.9	10280158	10280157	1028079	403.5	1285	418	1283.5	7	31.9	14.9	1028075
28	NaN	NaN	11.9	NaN	NaN	11.9	108.4	10280161	10280162	1028016	546.5	1062	543.5	1048	8	16.1	17.4	1028013
28	NaN	NaN	10.7	NaN	NaN	10.7	109.6	10280167	10280168	1028017	617	1107	608.5	1091	8	17.3	17.4	1028013
28	NaN	NaN	17.7	NaN	NaN	17.7	102.6	10280171	10280172	1028031	596	1116	564	1120.5	8	17.6	16	1028028
28	NaN	NaN	18.5	NaN	NaN	18.5	101.8	10280176	10280177	1028032	767	798	748.5	795	8	16.8	16	1028028
28	NaN	NaN	19.4	NaN	NaN	19.4	100.9	10280180	10280181	1028042	463.833	860.167	455.167	847.167	8	13.8	14.6	1028040
28	NaN	NaN	17.3	NaN	NaN	17.3	103	10280184	10280185	1028043	417.5	1112.5	403.5	1100.5	8	15.9	14.6	1028040
28	NaN	NaN	11.9	NaN	NaN	11.9	108.4	10280188	10280189	10280143	451.5	843	450.5	829	8	17.1	18	10280140
28	NaN	NaN	10.8	NaN	NaN	10.8	109.5	10280192	10280193	10280144	576	855.5	561	863	8	18.2	18	10280140
28	NaN	NaN	11.9	NaN	NaN	11.9	108.4	10280197	10280198	1028051	409.5	937	391.5	938.5	8	17.1	17.3	1028048
28	NaN	NaN	14.5	NaN	NaN	14.5	105.8	10280203	10280204	1028052	554.5	810.5	551.5	791.5	8	14.5	17.3	1028048
28	NaN	NaN	10.4	NaN	NaN	10.4	109.9	10280207	10280208	1028057	599	880	605.5	869	8	16.7	18.9	1028054
28	NaN	NaN	9.1	NaN	NaN	9.1	111.2	10280212	10280213	1028058	390	1171	389	1155	8	18	18.9	1028054
28	NaN	NaN	12.4	NaN	NaN	12.4	107.9	10280217	10280218	1028060	579	755	572.5	736.5	8	15.3	17.7	1028014
28	NaN	NaN	9.2	NaN	NaN	9.2	111.1	10280222	10280223	1028061	346	647.5	332.5	661.5	8	18.5	17.7	1028014
28	NaN	NaN	2.6	NaN	NaN	18.2	102.1	10280227	10280228	1028072	5	759	3	771	8	17.4	17	1028070
28	16.6	NaN	NaN	19.6	NaN	NaN	100	10280232	10280233	1028073	174.5	698	184	705	8	15.3	17	1028070
28	NaN	NaN	3.7	NaN	NaN	3.7	116.6	10280234	10280235	10280232	148	662.5	134.5	665.5	9	16.6	15.3	1028073
28	NaN	NaN	0.7	NaN	NaN	0.7	119.6	10280236	10280237	10280233	120.5	688.5	104.5	680.5	9	19.6	15.3	1028073
28	NaN	NaN	15.2	NaN	NaN	15.2	105.1	10280243	10280244	1028081	203.5	986.5	186.5	997.5	8	17	16.1	1028078
28	NaN	NaN	14.5	NaN	NaN	14.5	105.8	10280248	10280249	10280149	493	975.5	474.5	969	8	16.6	15.9	10280115
29	16.7	NaN	NaN	NaN	24	NaN	15.1	102902	102903	102901	336	660	323.5	656	2	NaN	NaN	1029000
29	NaN	22.7	NaN	NaN	26.4	NaN	31.8	102905	102906	102902	409	569	396.5	556.5	3	16.7	NaN	102901
30	NaN	NaN	4	16.2	NaN	NaN	7.6	103002	103003	103001	474.667	66.667	465.333	80	2	NaN	NaN	1030000
30	16.9	NaN	NaN	NaN	NaN	9.7	23.8	103006	103007	103003	622	258	612	245.5	3	16.2	NaN	103001
30	17.8	NaN	NaN	17.3	NaN	NaN	40.7	103009	1030010	103006	499.5	246.5	500	232	4	16.9	16.2	103003
30	NaN	NaN	2.6	17	NaN	NaN	58.5	1030012	1030013	103009	375.5	3.5	373	17	5	17.8	16.9	103006
30	16.3	NaN	NaN	NaN	NaN	2.7	75.5	1030016	1030017	1030013	304	96.5	282	110	6	17	17.8	103009
30	NaN	29.3	NaN	14.7	NaN	NaN	58	1030024	1030025	1030010	594.5	198	577	193.5	5	17.3	16.9	103006
30	NaN	NaN	3.7	NaN	NaN	2.7	72.7	1030030	1030031	1030025	435	7	423	12.5	6	14.7	17.3	1030010
30	23.1	NaN	NaN	NaN	NaN	14.5	91.8	1030019	1030020	1030016	517	89	495.5	89	7	16.3	17	1030013
30	NaN	NaN	5.4	NaN	NaN	5.4	114.9	1030034	1030035	1030019	343.5	19	340.5	31	8	23.1	16.3	1030016
31	19.3	NaN	NaN	19.4	NaN	NaN	14.2	103102	103103	103101	277.833	648.167	263.833	638.833	2	NaN	NaN	1031000
31	20.8	NaN	NaN	25.6	NaN	NaN	33.5	103105	103106	103102	532.167	530.167	526.167	551.5	3	19.3	NaN	103101
31	19.3	NaN	NaN	19.6	NaN	NaN	54.3	103108	103109	103105	498.5	384.5	489.5	402.5	4	20.8	19.3	103102
31	NaN	NaN	12.2	16.1	NaN	NaN	73.6	1031011	1031012	103108	658.5	122	649.5	97.5	5	19.3	20.8	103105
31	16.6	NaN	NaN	25.1	NaN	NaN	33.6	1031016	1031017	103103	270	843	254	846	3	19.4	NaN	103101
31	14.6	NaN	NaN	NaN	22.5	NaN	50.2	1031019	1031020	1031016	528	836.5	511.5	834	4	16.6	19.4	103103
31	15.8	NaN	NaN	14.5	NaN	NaN	64.8	1031022	1031023	1031019	497.5	822	505	810	5	14.6	16.6	1031016
31	19.3	NaN	NaN	19.1	NaN	NaN	59.1	1031028	1031029	103106	526	524	507.5	491.5	4	25.6	19.3	103102
31	NaN	36.9	NaN	NaN	26.7	NaN	78.4	1031031	1031032	1031028	351	660	339	644	5	19.3	25.6	103106
31	14.8	NaN	NaN	14.6	NaN	NaN	73.9	1031035	1031036	103109	605	77	595	95	5	19.6	20.8	103105
31	19.3	NaN	NaN	17.2	NaN	NaN	58.7	1031044	1031045	1031017	316.5	1153	318	1166	4	25.1	19.4	103103
31	NaN	39.6	NaN	NaN	41.3	NaN	78	1031047	1031048	1031044	270	957	261	973	5	19.3	25.1	1031017
31	16.7	NaN	NaN	17.7	NaN	NaN	79.3	1031053	1031054	1031023	596	651.5	580.5	669.5	6	14.5	14.6	1031019
31	17	NaN	NaN	19.4	NaN	NaN	78.2	1031058	1031059	1031029	482.5	515.5	462.5	518	5	19.1	25.6	103106
31	17.5	NaN	NaN	NaN	NaN	7	75.9	1031066	1031067	1031045	315.5	1201	302	1208	5	17.2	25.1	1031017
31	15	NaN	NaN	16.2	NaN	NaN	80.6	1031025	1031026	1031022	538.167	870.167	527.833	875.5	6	15.8	14.6	1031019
31	18.4	NaN	NaN	16.5	NaN	NaN	88.7	1031038	1031039	1031035	405	258	390.5	258	6	14.8	19.6	103109
31	NaN	8.6	NaN	NaN	NaN	8.7	89.7	1031041	1031042	1031012	698.5	129.5	681	136	6	16.1	19.3	103108
31	15.2	NaN	NaN	15.3	NaN	NaN	88.5	1031063	1031064	1031036	800.5	108.5	789.5	79.5	6	14.6	19.6	103109
31	NaN	NaN	26.9	NaN	NaN	12.7	93.4	1031069	1031070	1031066	522	1180	509.5	1185.5	6	17.5	17.2	1031045
31	NaN	NaN	25.1	NaN	23.3	NaN	95.2	1031073	1031074	1031058	508.5	537	495	542.5	6	17	19.1	1031029
31	18.4	NaN	NaN	17.3	NaN	NaN	96	1031076	1031077	1031053	675.5	808	655.5	803.5	7	16.7	14.5	1031023
31	NaN	NaN	5.9	NaN	NaN	5.9	114.4	1031080	1031079	1031076	784	1166	795.5	1175.5	8	18.4	16.7	1031053
31	NaN	NaN	7	NaN	NaN	7	113.3	1031084	1031085	1031077	642	1076	637	1058.5	8	17.3	16.7	1031053
31	16.6	NaN	NaN	15.7	NaN	NaN	95.6	1031091	1031092	1031025	442.5	989.5	427.5	1001.5	7	15	15.8	1031022
31	NaN	NaN	8.1	NaN	NaN	8.1	112.2	1031094	1031095	1031091	458.5	1013	451.5	1026	8	16.6	15	1031025
31	NaN	NaN	9	NaN	NaN	9	111.3	1031099	10310100	1031092	395	965	386.5	962.5	8	15.7	15	1031025
31	17.4	NaN	NaN	19.1	NaN	NaN	96.8	10310104	10310105	1031026	161.5	625.5	150.833	610.833	7	16.2	15.8	1031022
31	NaN	NaN	6.1	NaN	NaN	6.1	114.2	10310107	10310108	10310104	100	765.5	85	758.5	8	17.4	16.2	1031026
31	NaN	NaN	4.4	NaN	NaN	4.4	115.9	10310112	10310113	10310105	62	673	54	679	8	19.1	16.2	1031026
31	NaN	NaN	13.2	NaN	NaN	13.2	107.1	10310119	10310120	1031038	426	308.5	412	295	7	18.4	14.8	1031035
31	NaN	NaN	15.1	NaN	NaN	15.1	105.2	10310125	10310126	1031039	339	409.5	325	396.5	7	16.5	14.8	1031035
31	NaN	NaN	23.3	23.1	NaN	NaN	97	10310134	10310135	1031054	725	322	706.5	333.5	7	17.7	14.5	1031023
31	NaN	NaN	0.2	NaN	NaN	0.2	120.1	10310139	10310140	10310135	737.833	344.167	716.5	342.833	8	23.1	17.7	1031054
31	NaN	18.7	NaN	NaN	NaN	13.9	97.6	10310142	10310143	1031059	120.5	515	123	495	6	19.4	19.1	1031029
31	NaN	NaN	16.6	NaN	NaN	16.6	103.7	10310147	10310148	1031063	960.5	196	952.5	186	7	15.2	14.6	1031036
31	NaN	NaN	0.2	NaN	NaN	0.2	103.8	10310157	10310158	1031064	633.5	5	622.5	7	7	15.3	14.6	1031036
32	23.7	NaN	NaN	NaN	NaN	15.3	20.1	103202	103203	103201	278.5	706.5	284.5	686.5	2	NaN	NaN	1032000
32	19.3	NaN	NaN	29.7	NaN	NaN	43.8	103205	103206	103202	331.5	350	313	352.5	3	23.7	NaN	103201
32	18	NaN	NaN	24.5	NaN	NaN	63.1	103208	103209	103205	239	156	219	169.5	4	19.3	23.7	103202
32	NaN	8.3	NaN	NaN	12.1	NaN	73.5	1032016	1032017	103206	347.5	154	331.5	147.5	4	29.7	23.7	103202
32	22.7	NaN	NaN	NaN	NaN	39.2	81.1	1032011	1032012	103208	363	252.5	347	251	5	18	19.3	103205
32	NaN	NaN	4.8	NaN	NaN	4.5	87.6	1032021	1032022	103209	75.5	107.5	71.5	88.5	5	24.5	19.3	103205
32	15.8	NaN	NaN	NaN	NaN	4	103.8	1032027	1032028	1032011	351	257.5	329.5	249.5	6	22.7	18	103208
32	NaN	NaN	0.7	NaN	NaN	0.7	119.6	1032029	1032030	1032027	210	328	195.5	313.5	7	15.8	22.7	1032011
34	NaN	NaN	7.5	18.9	NaN	NaN	0.8	103402	103403	103401	1142.67	104	1134.67	130.667	2	NaN	NaN	1034000
34	NaN	NaN	2.6	NaN	NaN	4.4	19.7	103406	103407	103403	1270.83	80.833	1243.5	74.833	3	18.9	NaN	103401
35	16.1	NaN	NaN	NaN	NaN	8.5	17.7	103502	103503	103501	572	76	585.333	72	2	NaN	NaN	1035000
35	NaN	NaN	10.4	14.9	NaN	NaN	33.8	103504	103505	103502	414.167	83.5	404.833	102.167	3	16.1	NaN	103501
35	17.5	NaN	NaN	17.6	NaN	NaN	48.7	103508	103509	103505	438.833	298.833	416.167	288.167	4	14.9	16.1	103502
35	NaN	NaN	3.9	15.7	NaN	NaN	66.2	1035011	1035012	103508	645.167	100.167	638.5	113.5	5	17.5	14.9	103505
35	18.7	NaN	NaN	19	NaN	NaN	81.9	1035015	1035016	1035012	538.5	243.5	524.5	257.5	6	15.7	17.5	103508
35	NaN	NaN	5.5	NaN	NaN	6.1	66.3	1035020	1035021	103509	832.5	204.833	823.833	181.5	5	17.6	14.9	103505
35	NaN	NaN	19.4	NaN	NaN	19.4	100.9	1035025	1035026	1035016	442.5	162.167	445.833	178.167	7	19	15.7	1035012
35	NaN	NaN	4.4	NaN	NaN	4.4	100.6	1035029	1035030	1035015	493.5	222.5	474.5	211	7	18.7	15.7	1035012
36	NaN	NaN	0.5	16.6	NaN	NaN	9.6	103602	103603	103601	757.333	1328	737.333	1316	2	NaN	NaN	1036000
36	17.4	NaN	NaN	20.1	NaN	NaN	26.2	103605	103606	103603	837.333	1280	808	1270.67	3	16.6	NaN	103601
36	NaN	NaN	0.2	NaN	NaN	0.2	43.6	103607	103608	103605	1346.67	1349.33	1336	1348	4	17.4	16.6	103603
36	NaN	NaN	0.2	NaN	NaN	0.2	46.3	103609	1036010	103606	1276	1117.33	1276	1092	4	20.1	16.6	103603
37	20.4	NaN	NaN	16.4	NaN	NaN	11.2	103701	103702	103703	1345.33	1005.33	1344	1033.33	2	NaN	NaN	1037000
37	16.3	NaN	NaN	18.2	NaN	NaN	31.6	103704	103705	103701	1256	1024	1253.33	1001.33	3	20.4	NaN	103703
37	16.7	NaN	NaN	14.2	NaN	NaN	47.9	103706	103707	103704	1262.67	1132	1240	1125.33	4	16.3	20.4	103701
37	15.4	NaN	NaN	14.7	NaN	NaN	64.6	103708	103709	103706	1162	1048	1148	1039	5	16.7	16.3	103704
37	NaN	NaN	15.3	NaN	NaN	40.3	80	1037010	1037011	103708	1234	1075.5	1208.5	1064	6	15.4	16.7	103706
37	NaN	NaN	0.2	NaN	NaN	0.2	27.6	1037013	1037014	103702	1333	938.5	1323.5	924.5	3	16.4	NaN	103703
37	16.5	NaN	NaN	17.2	NaN	NaN	49.8	1037015	1037016	103705	1189	1002.5	1184	979	4	18.2	20.4	103701
37	NaN	NaN	17.6	NaN	NaN	2.1	66.3	1037017	1037018	1037015	1330	963	1317.5	955.5	5	16.5	18.2	103705
37	NaN	NaN	9.9	NaN	NaN	6.9	67	1037021	1037022	1037016	1250	816	1246	836.5	5	17.2	18.2	103705
37	17.3	NaN	NaN	17.5	NaN	NaN	79.3	1037026	1037027	103709	1202	835.5	1189.5	853.5	6	14.7	16.7	103706
37	15.8	NaN	NaN	17.3	NaN	NaN	96.6	1037028	1037029	1037026	1073.5	1090.5	1052.5	1086.5	7	17.3	14.7	103709
37	NaN	NaN	7.9	NaN	NaN	7.9	112.4	1037030	1037031	1037028	1255	985	1237	974.5	8	15.8	17.3	1037026
37	NaN	NaN	6.4	NaN	NaN	6.4	113.9	1037033	1037034	1037029	1240	1054	1226	1071.5	8	17.3	17.3	1037026
37	20.6	NaN	NaN	18.8	NaN	NaN	96.8	1037035	1037036	1037027	993	974	979.5	982	7	17.5	14.7	103709
37	NaN	NaN	2.9	NaN	NaN	2.9	117.4	1037037	1037038	1037035	931.5	1002.5	912.5	1005.5	8	20.6	17.5	1037027
37	NaN	NaN	4.7	NaN	NaN	4.7	115.6	1037039	1037040	1037036	986.5	1031.5	972.5	1031	8	18.8	17.5	1037027
37	NaN	NaN	10.7	15.8	NaN	NaN	62.1	1037041	1037042	103707	1289.5	1220.5	1281.5	1229.5	5	14.2	16.3	103704
37	14.7	NaN	NaN	15.9	NaN	NaN	77.9	1037044	1037045	1037042	1171.5	1230.5	1157	1241.5	6	15.8	14.2	103707
37	17.2	NaN	NaN	17.4	NaN	NaN	92.6	1037046	1037047	1037044	948.5	1255	933	1274	7	14.7	15.8	1037042
37	NaN	6	NaN	NaN	8.8	NaN	109.8	1037048	1037049	1037046	985	1285.5	979.5	1304.5	8	17.2	14.7	1037044
37	NaN	NaN	10.3	NaN	NaN	7	110	1037053	1037054	1037047	895.5	1316	872.5	1327.5	8	17.4	14.7	1037044
37	NaN	NaN	6.3	17.4	NaN	NaN	93.8	1037057	1037058	1037045	1063	1271	1048	1295	7	15.9	15.8	1037042
37	NaN	NaN	9.1	NaN	NaN	9.1	111.2	1037060	1037061	1037058	1185.5	1301.5	1178.5	1289	8	17.4	15.9	1037045
38	NaN	NaN	12.6	17.5	NaN	NaN	7.4	103802	103803	103801	868	80	880	80	2	NaN	NaN	1038000
38	17.9	NaN	NaN	NaN	NaN	3.4	24.9	103805	103806	103803	811	26	785	18	3	17.5	NaN	103801
38	16.6	NaN	NaN	15.5	NaN	NaN	42.8	103807	103808	103805	1007	165	994	150	4	17.9	17.5	103803
38	17.2	NaN	NaN	16.5	NaN	NaN	59.4	103809	1038010	103807	879	186	870.5	200	5	16.6	17.9	103805
38	NaN	NaN	2.9	17.6	NaN	NaN	76.6	1038011	1038012	103809	840	82.5	835.5	66	6	17.2	16.6	103807
38	NaN	NaN	26.1	17.1	NaN	NaN	94.2	1038014	1038015	1038012	752.5	19.5	746	6.5	7	17.6	17.2	103809
38	NaN	NaN	9	NaN	NaN	9	111.3	1038017	1038018	1038015	774.5	83.5	760	79	8	17.1	17.6	1038012
38	NaN	NaN	8.5	NaN	NaN	7.4	75.9	1038019	1038020	1038010	907.5	138	898	123.5	6	16.5	16.6	103807
38	NaN	26.8	NaN	16.3	NaN	NaN	58.3	1038023	1038024	103808	1017	71.5	1008.5	77.5	5	15.5	17.9	103805
38	17.6	NaN	NaN	17.3	NaN	NaN	74.6	1038026	1038027	1038024	1022	58.5	1022	50	6	16.3	15.5	103808
38	25.3	NaN	NaN	NaN	NaN	16.6	92.2	1038028	1038029	1038026	1070	109	1056.5	94	7	17.6	16.3	1038024
38	NaN	NaN	2.8	NaN	NaN	2.8	117.5	1038030	1038031	1038028	943.167	95.833	933.167	118.167	8	25.3	17.6	1038026
38	18.5	NaN	NaN	NaN	NaN	5.3	91.9	1038033	1038034	1038027	911.5	46.5	908.5	64.833	7	17.3	16.3	1038024
38	NaN	NaN	9.9	NaN	NaN	9.9	110.4	1038035	1038036	1038033	986.167	185.5	971.167	185.833	8	18.5	17.3	1038027
39	17.5	NaN	NaN	19.1	NaN	NaN	11	103902	103903	103901	1038.5	93	1023.5	98	2	NaN	NaN	1039000
39	NaN	NaN	2.8	NaN	NaN	2.8	28.5	103904	103905	103902	1169	4.5	1153.5	5	3	17.5	NaN	103901
39	NaN	NaN	1.3	NaN	NaN	3.8	30.1	103907	103908	103903	1306	111.5	1289.5	111	3	19.1	NaN	103901
40	15.5	NaN	NaN	14.8	NaN	NaN	11.1	104002	104003	104001	462.667	301.333	433.333	293.333	2	NaN	NaN	1040000
40	17.1	NaN	NaN	15.6	NaN	NaN	26.6	104004	104005	104002	698.667	570.667	698.667	586.667	3	15.5	NaN	104001
40	22.5	NaN	NaN	18.3	NaN	NaN	43.7	104006	104007	104004	518.167	847.167	496.167	861.167	4	17.1	15.5	104002
40	18	NaN	NaN	18	NaN	NaN	66.2	104008	104009	104006	570.5	877.167	566.5	851.833	5	22.5	17.1	104004
40	NaN	6.8	NaN	NaN	6.8	NaN	84.2	1040010	1040011	104008	501.5	882.5	490	881.5	6	18	22.5	104006
40	NaN	NaN	0.2	NaN	NaN	0.2	25.9	1040013	1040014	104003	1164	414.667	1162.67	433.333	3	14.8	NaN	104001
40	16.5	NaN	NaN	15.5	NaN	NaN	62	1040015	1040016	104007	260.5	1182	240	1172	5	18.3	17.1	104004
40	14.9	NaN	NaN	NaN	NaN	6.2	78.5	1040017	1040018	1040015	97.5	1050.5	85.5	1031.5	6	16.5	18.3	104007
40	18.2	NaN	NaN	18.6	NaN	NaN	93.4	1040019	1040020	1040017	318.5	1164	309	1175.5	7	14.9	16.5	1040015
40	NaN	NaN	8.7	NaN	NaN	8.7	111.6	1040021	1040022	1040019	446.5	1163.5	436.5	1155.5	8	18.2	14.9	1040017
40	18.9	NaN	NaN	16.1	NaN	NaN	42.2	1040023	1040024	104005	937.5	381	922.5	370.5	4	15.6	15.5	104002
40	17.6	NaN	NaN	NaN	29.4	NaN	61.1	1040025	1040026	1040023	906.5	471	890.5	488.5	5	18.9	15.6	104005
40	20.5	NaN	NaN	25.7	NaN	NaN	78.7	1040027	1040028	1040025	921	312	917.5	322.5	6	17.6	18.9	1040023
40	NaN	NaN	21.1	NaN	NaN	21.1	99.2	1040029	1040030	1040027	800.833	619.833	794.833	626.833	7	20.5	17.6	1040025
40	18.4	NaN	NaN	17.6	NaN	NaN	84.2	1040033	1040034	104009	556.833	847.833	557.167	831.167	6	18	22.5	104006
40	NaN	NaN	17.7	NaN	NaN	17.7	102.6	1040035	1040036	1040033	566.167	599.167	547.5	597.167	7	18.4	18	104009
40	NaN	NaN	18.5	NaN	NaN	18.5	101.8	1040037	1040038	1040034	525.833	594.5	509.167	597.833	7	17.6	18	104009
40	NaN	NaN	6.9	15.5	NaN	NaN	77.5	1040041	1040042	1040016	325.5	1132	319	1146	6	15.5	18.3	104007
40	18.4	NaN	NaN	19.7	NaN	NaN	93	1040044	1040045	1040042	506	1218.5	488	1225	7	15.5	15.5	1040016
40	NaN	NaN	8.9	NaN	NaN	8.9	111.4	1040046	1040047	1040044	260.5	1289.83	247.5	1289.5	8	18.4	15.5	1040042
40	NaN	NaN	7.6	NaN	NaN	7.6	112.7	1040048	1040049	1040045	369.5	1322.5	351.833	1319.5	8	19.7	15.5	1040042
40	NaN	NaN	8.3	NaN	NaN	8.3	112	1040051	1040052	1040020	330.5	1013.5	317.833	1020.83	8	18.6	14.9	1040017
40	NaN	NaN	5.1	NaN	NaN	5.1	58.3	1040053	1040054	1040024	1157	290	1137	287	5	16.1	15.6	104005
40	NaN	NaN	15.9	NaN	NaN	15.9	104.4	1040057	1040058	1040028	737	277	730.5	289.5	7	25.7	17.6	1040025
41	16.9	NaN	NaN	16.5	NaN	NaN	11.3	104102	104103	104101	329	656	308	651.5	2	NaN	NaN	1041000
41	16.9	NaN	NaN	16.3	NaN	NaN	28.2	104104	104105	104102	402.5	524.5	385.5	535.5	3	16.9	NaN	104101
41	15.4	NaN	NaN	18.8	NaN	NaN	45.1	1041012	1041013	104104	317	574.5	296	581.5	4	16.9	16.9	104102
41	16.9	NaN	NaN	15.9	NaN	NaN	60.5	1041014	1041015	1041012	384	727.5	385.5	708	5	15.4	16.9	104104
41	NaN	NaN	15.5	17	NaN	NaN	77.4	1041016	1041017	1041014	244.5	1040.5	236.5	1017.5	6	16.9	15.4	1041012
41	19.9	NaN	NaN	19.3	NaN	NaN	94.4	1041019	1041020	1041017	406	1094.5	401.5	1111	7	17	16.9	1041014
41	NaN	NaN	6	NaN	NaN	6	114.3	1041021	1041022	1041019	511	1128.5	501.5	1112	8	19.9	17	1041017
41	NaN	NaN	6.6	NaN	NaN	6.6	113.7	1041023	1041024	1041020	493.5	1046	483.5	1057.5	8	19.3	17	1041017
41	18.1	NaN	NaN	15.3	NaN	NaN	63.9	1041025	1041026	1041013	231.5	468.167	223.5	476.167	5	18.8	16.9	104104
41	16.7	NaN	NaN	17.2	NaN	NaN	82	1041027	1041028	1041025	372.833	310.167	346.833	312.833	6	18.1	18.8	1041013
41	NaN	NaN	21.6	NaN	NaN	21.6	98.7	1041029	1041030	1041027	856.167	512.167	843.5	526.167	7	16.7	18.1	1041025
41	NaN	NaN	21.1	NaN	NaN	21.1	99.2	1041032	1041033	1041028	104	174	93.5	187.5	7	17.2	18.1	1041025
41	15.5	NaN	NaN	16.2	NaN	NaN	79.2	1041036	1041037	1041026	390	312.5	376.5	299.5	6	15.3	18.8	1041013
41	24.8	NaN	NaN	NaN	NaN	25.6	94.7	1041038	1041039	1041036	304.5	251	281	242	7	15.5	15.3	1041026
41	NaN	NaN	0.8	NaN	NaN	0.8	119.5	1041041	1041042	1041038	340	303.5	324	313.5	8	24.8	15.5	1041036
41	20.7	NaN	NaN	21.2	NaN	NaN	95.4	1041043	1041044	1041037	383	514.5	378.5	502	7	16.2	15.3	1041026
41	NaN	NaN	4.2	NaN	NaN	4.2	116.1	1041045	1041046	1041043	536.5	369	524	362	8	20.7	16.2	1041037
41	NaN	NaN	3.7	NaN	NaN	3.7	116.6	1041047	1041048	1041044	514	526	502.5	528	8	21.2	16.2	1041037
41	16.3	NaN	NaN	17	NaN	NaN	76.4	1041049	1041050	1041015	365	696.5	346	694.5	6	15.9	15.4	1041012
41	NaN	NaN	8.2	18	NaN	NaN	92.7	1041051	1041052	1041049	296.5	418.5	283.5	411	7	16.3	15.9	1041015
41	NaN	NaN	9.6	NaN	NaN	9.6	110.7	1041054	1041055	1041052	138.5	270.5	141	294.5	8	18	16.3	1041049
41	NaN	NaN	26.9	NaN	NaN	0.2	93.4	1041056	1041057	1041050	713	548.5	692.5	540.5	7	17	15.9	1041015
41	16.2	NaN	NaN	16.1	NaN	NaN	27.8	1041010	1041011	104103	179	677.5	176.5	698.5	3	16.5	NaN	104101
41	19.8	NaN	NaN	18	NaN	NaN	44	1041059	1041060	1041010	286.167	659.167	274.833	657.833	4	16.2	16.5	104103
41	16.5	NaN	NaN	19.5	NaN	NaN	63.8	1041061	1041062	1041059	446.833	829.833	441.5	814.5	5	19.8	16.2	1041010
41	18.4	NaN	NaN	18.4	NaN	NaN	80.3	1041063	1041064	1041061	480.833	1005.5	476.167	1023.83	6	16.5	19.8	1041059
41	NaN	NaN	21.6	NaN	NaN	21.6	98.7	1041065	1041066	1041063	634.833	989.833	618.167	993.833	7	18.4	16.5	1041061
41	NaN	NaN	21.6	NaN	NaN	21.6	98.7	1041069	1041070	1041064	445.167	1182.17	425.5	1191.5	7	18.4	16.5	1041061
41	17.5	NaN	NaN	21.1	NaN	NaN	83.3	1041073	1041074	1041062	733.167	961.5	720.167	941.833	6	19.5	19.8	1041059
41	NaN	NaN	19.5	NaN	NaN	19.5	100.8	1041075	1041076	1041073	780.167	1030.17	766.5	1035.83	7	17.5	19.5	1041062
41	NaN	NaN	15.9	NaN	NaN	15.9	104.4	1041079	1041080	1041074	499.833	929.167	485.833	917.833	7	21.1	19.5	1041062
41	NaN	NaN	7.8	16.5	NaN	NaN	62	1041083	1041084	1041060	132.833	706.167	115.833	704.167	5	18	16.2	1041010
41	18.7	NaN	NaN	18.8	NaN	NaN	78.5	1041086	1041087	1041084	42.5	848.833	22.5	839.167	6	16.5	18	1041060
41	NaN	NaN	23.1	23	NaN	NaN	97.2	1041088	1041089	1041086	368.167	848.5	356.167	866.5	7	18.7	16.5	1041084
41	NaN	NaN	0.1	NaN	NaN	0.1	120.2	1041091	1041092	1041089	361.833	972.5	362.833	980.5	8	23	18.7	1041086
41	NaN	NaN	23	NaN	NaN	23	97.3	1041093	1041094	1041087	180.833	760.5	180.833	782.167	7	18.8	16.5	1041084
41	19.8	NaN	NaN	18.8	NaN	NaN	43.9	1041097	1041098	1041011	266.5	411.5	252.5	404.833	4	16.1	16.5	104103
41	NaN	NaN	56.6	NaN	NaN	56.6	63.7	1041099	10410100	1041097	23.833	502.167	10.833	495.167	5	19.8	16.1	1041011
41	17.1	NaN	NaN	18.6	NaN	NaN	62.7	10410103	10410104	1041098	150.167	633.167	148.5	620.167	5	18.8	16.1	1041011
41	16.6	NaN	NaN	17	NaN	NaN	79.8	10410105	10410106	10410103	342.5	536.5	339.5	519.167	6	17.1	18.8	1041098
41	NaN	NaN	7.7	NaN	NaN	3.4	96.4	10410107	10410108	10410105	113.833	352.833	104.833	340.833	7	16.6	17.1	10410103
41	13.8	NaN	NaN	NaN	NaN	23.5	96.8	10410111	10410112	10410106	376.167	684.167	367.5	683.167	7	17	17.1	10410103
41	NaN	NaN	9.7	NaN	NaN	9.7	110.6	10410113	10410114	10410111	386.167	612.833	376.5	595.833	8	13.8	17	10410106
41	16.1	NaN	NaN	16.1	NaN	NaN	81.3	10410116	10410117	10410104	136.5	461.167	125.833	446.5	6	18.6	18.8	1041098
41	21.5	NaN	NaN	NaN	NaN	22.9	97.4	10410118	10410119	10410116	143.167	456.167	124.5	462.5	7	16.1	18.6	10410104
41	NaN	NaN	1.4	NaN	NaN	1.4	118.9	10410120	10410121	10410118	72.5	380.5	57.833	384.5	8	21.5	16.1	10410116
41	16.4	NaN	NaN	NaN	NaN	4.7	97.4	10410124	10410123	10410117	73.5	535.5	72.5	509.5	7	16.1	18.6	10410104
41	NaN	NaN	6.5	NaN	NaN	6.5	113.8	10410125	10410126	10410124	150.5	724.167	132.5	732.167	8	16.4	16.1	10410117
41	18.3	NaN	NaN	18.4	NaN	NaN	44.5	10410128	10410129	104105	294.167	557.5	284.5	542.833	4	16.3	16.9	104102
41	17.9	NaN	NaN	20	NaN	NaN	62.8	10410130	10410131	10410128	316.833	599.833	308.5	609.833	5	18.3	16.3	104105
41	18.9	NaN	NaN	19.8	NaN	NaN	80.7	10410132	10410133	10410130	330.167	845.5	326.833	859.167	6	17.9	18.3	10410128
41	NaN	NaN	20.7	NaN	NaN	20.7	99.6	10410134	10410135	10410132	296.167	541.5	285.25	548.5	7	18.9	17.9	10410130
41	NaN	NaN	6.1	NaN	NaN	19.8	100.5	10410138	10410139	10410133	108.5	838	78	843.5	7	19.8	17.9	10410130
41	18.3	NaN	NaN	22.8	NaN	NaN	82.8	10410142	10410143	10410131	334.5	641.833	320.5	657.833	6	20	18.3	10410128
41	NaN	NaN	19.2	NaN	NaN	19.2	101.1	10410144	10410145	10410142	484.5	824.833	481.167	804.833	7	18.3	20	10410131
41	NaN	3.9	NaN	NaN	4.6	NaN	105.6	10410148	10410149	10410143	202.167	591.833	201.167	565.833	7	22.8	20	10410131
41	19.2	NaN	NaN	18	NaN	NaN	62.9	10410152	10410153	10410129	306.5	626.167	304.167	612.5	5	18.4	16.3	104105
41	16.1	NaN	NaN	16.9	NaN	NaN	82.1	10410154	10410155	10410152	395.5	494.167	377.167	512.167	6	19.2	18.4	10410129
41	NaN	NaN	22.1	NaN	NaN	22.1	98.2	10410156	10410157	10410154	382.167	604.833	373.167	620.833	7	16.1	19.2	10410152
41	21.2	NaN	NaN	21.1	NaN	NaN	99	10410160	10410161	10410155	405.833	477.167	393.167	479.167	7	16.9	19.2	10410152
41	NaN	NaN	0.1	NaN	NaN	0.1	120.2	10410162	10410163	10410160	368.167	397.833	355.5	406.5	8	21.2	16.9	10410155
41	NaN	NaN	0.2	NaN	NaN	0.2	120.1	10410164	10410165	10410161	416.833	460.5	406.5	446.5	8	21.1	16.9	10410155
41	NaN	NaN	10.5	NaN	NaN	4.4	80.9	10410168	10410169	10410153	215.167	457.833	188.833	468.5	6	18	18.4	10410129
42	13.7	NaN	NaN	14.7	NaN	NaN	15.6	104202	104203	104201	296.833	570.833	305.5	576.167	2	NaN	NaN	1042000
42	12.9	NaN	NaN	13.9	NaN	NaN	29.3	104204	104205	104202	133.5	417.5	120.167	401.5	3	13.7	NaN	104201
42	15.6	NaN	NaN	18.1	NaN	NaN	42.2	104206	104207	104204	144.833	409.5	125.5	419.5	4	12.9	13.7	104202
42	NaN	NaN	1.1	NaN	NaN	1.1	57.8	104208	104209	104206	52.167	408.833	46.833	422.833	5	15.6	12.9	104204
42	NaN	NaN	4.4	NaN	NaN	4.4	60.3	1042012	1042013	104207	240.167	468.833	238.167	499.5	5	18.1	12.9	104204
42	28.1	NaN	NaN	26.5	NaN	NaN	43.2	1042016	1042015	104205	163.5	376.167	183.5	374.833	4	13.9	13.7	104202
42	13.4	NaN	NaN	13.1	NaN	NaN	71.3	1042017	1042018	1042016	211.5	358.833	210.167	338.167	5	28.1	13.9	104205
42	15.3	NaN	NaN	NaN	NaN	10.1	84.7	1042019	1042020	1042017	248.833	442.167	254.833	462.167	6	13.4	28.1	1042016
42	NaN	20.3	NaN	NaN	NaN	20.3	100	1042021	1042022	1042019	328.167	462.167	330.167	476.167	7	15.3	13.4	1042017
42	15.5	NaN	NaN	13.9	NaN	NaN	30.3	1042025	1042026	104203	1278.67	516	1254.67	512	3	14.7	NaN	104201
42	NaN	NaN	6.7	18.1	NaN	NaN	45.8	1042027	1042028	1042025	1334	340	1325	329	4	15.5	14.7	104203
42	17.4	NaN	NaN	18.9	NaN	NaN	63.9	1042030	1042031	1042028	1309	384	1290.5	368	5	18.1	15.5	1042025
42	20.2	NaN	NaN	25.4	NaN	NaN	81.3	1042032	1042033	1042030	1054	246.5	1039	243	6	17.4	18.1	1042028
42	NaN	NaN	18.8	NaN	NaN	18.8	101.5	1042034	1042035	1042032	1263	468.5	1245.5	466.5	7	20.2	17.4	1042030
42	NaN	NaN	13.6	NaN	NaN	13.6	106.7	1042038	1042039	1042033	1277	319	1265	312	7	25.4	17.4	1042030
42	NaN	NaN	22.1	NaN	NaN	37.5	82.8	1042040	1042041	1042031	1214.5	433	1194	439.5	6	18.9	18.1	1042028
42	16.9	NaN	NaN	16	NaN	NaN	44.2	1042044	1042045	1042026	1216.5	796	1213	806.5	4	13.9	14.7	104203
42	17.4	NaN	NaN	17.7	NaN	NaN	61.1	1042046	1042047	1042044	1016.5	992.5	993.5	981.5	5	16.9	13.9	1042026
42	15.8	NaN	NaN	17.1	NaN	NaN	78.5	1042048	1042049	1042046	1270	707.5	1248	714.5	6	17.4	16.9	1042044
42	20.8	NaN	NaN	21.9	NaN	NaN	94.3	1042050	1042051	1042048	1199.5	861.5	1198.5	842.5	7	15.8	17.4	1042046
42	NaN	NaN	5.2	NaN	NaN	5.2	115.1	1042052	1042053	1042050	964	876.5	961	894.5	8	20.8	15.8	1042048
42	NaN	NaN	4.1	NaN	NaN	4.1	116.2	1042054	1042055	1042051	1108.5	747.5	1094	751.5	8	21.9	15.8	1042048
42	NaN	19.5	NaN	23.5	NaN	NaN	95.6	1042056	1042057	1042049	1154	979.5	1141	964	7	17.1	17.4	1042046
42	NaN	NaN	1.2	NaN	NaN	1.2	119.1	1042059	1042060	1042057	1176.5	961.5	1155	953	8	23.5	17.1	1042049
42	NaN	NaN	5	NaN	NaN	4	78.8	1042061	1042062	1042047	1235.5	1001	1229.5	973.5	6	17.7	16.9	1042044
42	18.5	NaN	NaN	16.3	NaN	NaN	60.2	1042065	1042066	1042045	1069	831.5	1054.5	843.5	5	16	13.9	1042026
42	18.2	NaN	NaN	17.9	NaN	NaN	78.7	1042067	1042068	1042065	1124.5	878.5	1107	868	6	18.5	16	1042045
42	NaN	NaN	12.5	NaN	NaN	10.8	96.9	1042069	1042070	1042067	1324	1173	1309.5	1178	7	18.2	18.5	1042065
42	NaN	NaN	23.7	NaN	NaN	9.9	96.6	1042074	1042075	1042068	1200	749	1191.5	736.5	7	17.9	18.5	1042065
42	18.7	NaN	NaN	23.9	NaN	NaN	76.5	1042078	1042079	1042066	938	1010	935.5	1035	6	16.3	16	1042045
42	NaN	NaN	25.1	NaN	NaN	25.1	95.2	1042080	1042081	1042078	1107	1128.5	1104.5	1138	7	18.7	16.3	1042066
42	NaN	NaN	19.9	NaN	NaN	19.9	100.4	1042084	1042085	1042079	817.5	1057.5	792	1047	7	23.9	16.3	1042066
42	12.8	NaN	NaN	NaN	NaN	4.3	84.4	1042089	1042090	1042018	342.5	226.5	338	253	6	13.1	28.1	1042016
42	NaN	NaN	3.4	NaN	NaN	4.9	97.2	1042091	1042092	1042089	32	517	29.5	497.5	7	12.8	13.1	1042018
42	13.3	NaN	NaN	12.8	NaN	NaN	69.7	1042096	1042097	1042015	330.5	504	307	515.5	5	26.5	13.9	104205
42	16.1	NaN	NaN	16.5	NaN	NaN	83	1042098	1042099	1042096	202.5	1019	197	996.5	6	13.3	26.5	1042015
42	NaN	NaN	21.2	NaN	NaN	21.2	99.1	10420100	10420101	1042098	723	913	711.5	925.5	7	16.1	13.3	1042096
42	NaN	NaN	15.1	25.9	NaN	NaN	82.5	10420104	10420105	1042097	460	412	451	428	6	12.8	26.5	1042015
42	NaN	NaN	11.9	NaN	NaN	11.9	108.4	10420107	10420108	10420105	442	60	429	56	7	25.9	12.8	1042097
42	NaN	NaN	20.8	NaN	NaN	20.8	99.5	10420109	10420110	1042099	266.5	990.5	248.5	985.5	7	16.5	13.3	1042096
43	17	NaN	NaN	19.3	NaN	NaN	14.3	104302	104303	104301	338	588.5	326	599	2	NaN	NaN	1043000
43	20.9	NaN	NaN	27.8	NaN	NaN	31.3	104304	104305	104302	400	584.5	387	567.5	3	17	NaN	104301
43	20.5	NaN	NaN	33.1	NaN	NaN	52.2	104306	104307	104304	373.5	630.5	358.5	640	4	20.9	17	104302
43	13.6	NaN	NaN	14.4	NaN	NaN	72.7	104308	104309	104306	534	645.5	533.5	626	5	20.5	20.9	104304
43	NaN	24	NaN	NaN	19.3	NaN	86.3	1043010	1043011	104308	571.167	464.167	567.5	451.5	6	13.6	20.5	104306
43	27.8	NaN	NaN	25.9	NaN	NaN	33.6	1043016	1043015	104303	572.167	652.5	584.167	652.167	3	19.3	NaN	104301
43	14.3	NaN	NaN	15.8	NaN	NaN	61.4	1043017	1043018	1043016	640.167	885.5	608.5	887.5	4	27.8	19.3	104303
43	19.7	NaN	NaN	17.4	NaN	NaN	75.7	1043019	1043020	1043017	703.5	913.5	687.833	896.167	5	14.3	27.8	1043016
43	NaN	NaN	24.9	NaN	NaN	24.9	95.4	1043021	1043022	1043019	561.167	1148.83	550.5	1163.17	6	19.7	14.3	1043017
43	15	NaN	NaN	21.1	NaN	NaN	59.1	1043025	1043026	104305	249.5	311.5	236.167	323.5	4	27.8	17	104302
43	14.4	NaN	NaN	14.4	NaN	NaN	74.1	1043027	1043028	1043025	283.833	357.833	268.5	362.833	5	15	27.8	104305
43	NaN	NaN	31.8	NaN	26	NaN	88.5	1043029	1043030	1043027	299.5	311.167	294.833	294.5	6	14.4	15	1043025
43	NaN	5	NaN	NaN	5	NaN	85.3	1043033	1043034	104307	109.5	575.833	88.167	586.5	5	33.1	20.9	104304
43	NaN	28.6	NaN	NaN	30.4	NaN	87.1	1043036	1043037	104309	579.167	684.5	564.167	682.833	6	14.4	20.5	104306
43	21.2	NaN	NaN	20.9	NaN	NaN	59.5	1043040	1043041	1043015	461.167	661.5	432.167	655.167	4	25.9	19.3	104303
43	NaN	27.5	NaN	NaN	NaN	18	80.7	1043042	1043043	1043040	193.833	984.833	185.833	1001.83	5	21.2	25.9	1043015
43	NaN	21	NaN	NaN	27.5	NaN	80.4	1043046	1043047	1043041	368.5	602.167	353.833	591.167	5	20.9	25.9	1043015
43	NaN	33.9	NaN	NaN	30.7	NaN	80.2	1043050	1043051	1043026	337.167	474.833	324.167	459.5	5	21.1	27.8	104305
43	NaN	NaN	4	NaN	NaN	22.6	88.5	1043054	1043055	1043028	90.5	115.833	82.5	138.167	6	14.4	15	1043025
43	NaN	35	NaN	21.1	NaN	NaN	77.2	1043058	1043059	1043018	584.167	1019.17	574.167	994.833	5	15.8	27.8	1043016
43	18.1	NaN	NaN	18	NaN	NaN	98.3	1043061	1043062	1043059	626.833	864.167	616.833	855.833	6	21.1	15.8	1043018
43	NaN	NaN	3.9	NaN	NaN	3.9	116.4	1043063	1043064	1043061	635.167	881.5	617.833	876.167	7	18.1	21.1	1043059
43	NaN	NaN	4	NaN	NaN	4	116.3	1043065	1043066	1043062	567.833	955.167	550.167	947.167	7	18	21.1	1043059
43	20.9	NaN	NaN	18	NaN	NaN	93.1	1043067	1043068	1043020	819.5	942.167	802.167	941.833	6	17.4	14.3	1043017
43	NaN	NaN	6.3	NaN	NaN	6.3	114	1043069	1043070	1043067	874.833	947.167	865.167	959.167	7	20.9	17.4	1043020
43	NaN	NaN	9.2	NaN	NaN	9.2	111.1	1043071	1043072	1043068	733.833	880.833	718.167	882.167	7	18	17.4	1043020
44	16.5	NaN	NaN	14.7	NaN	NaN	17.6	104402	104403	104401	608	906	607	923	2	NaN	NaN	1044000
44	20.8	NaN	NaN	18.8	NaN	NaN	34.1	104404	104405	104402	631.833	741.5	625.833	736.833	3	16.5	NaN	104401
44	15	NaN	NaN	16.7	NaN	NaN	54.9	104406	104407	104404	892.5	873.5	877.167	884.5	4	20.8	16.5	104402
44	15.1	NaN	NaN	17.8	NaN	NaN	69.9	104408	104409	104406	836.833	1004.83	829.833	989.167	5	15	20.8	104404
44	14.9	NaN	NaN	16	NaN	NaN	85	1044010	1044011	104408	824.833	808.833	805.833	806.5	6	15.1	15	104406
44	NaN	NaN	20.4	18.6	NaN	NaN	99.9	1044012	1044013	1044010	1000.5	888.833	998.167	870.167	7	14.9	15.1	104408
44	NaN	NaN	1.8	NaN	NaN	1.8	118.5	1044015	1044016	1044013	982.167	1020.83	975.5	1004.17	8	18.6	14.9	1044010
44	18.1	NaN	NaN	NaN	NaN	19.3	101	1044017	1044018	1044011	779.5	939.167	770.167	954.167	7	16	15.1	104408
44	NaN	NaN	1.2	NaN	NaN	1.2	119.1	1044019	1044020	1044017	786.833	994.167	774.833	1003.17	8	18.1	16	1044011
44	17.4	NaN	NaN	15.3	NaN	NaN	87.7	1044022	1044023	104409	940.833	1140.83	923.167	1121.5	6	17.8	15	104406
44	NaN	NaN	15.2	NaN	NaN	15.2	105.1	1044024	1044025	1044022	917.5	1163.83	897.833	1171.17	7	17.4	17.8	104409
44	NaN	NaN	17.3	NaN	NaN	17.3	103	1044028	1044029	1044023	845.167	1201.83	826.833	1198.83	7	15.3	17.8	104409
44	15.4	NaN	NaN	16.9	NaN	NaN	71.6	1044032	1044033	104407	944.5	892.167	939.5	872.833	5	16.7	20.8	104404
44	14.7	NaN	NaN	19.7	NaN	NaN	87	1044034	1044035	1044032	717.167	811.167	698.833	808.167	6	15.4	16.7	104407
44	NaN	NaN	18.6	NaN	NaN	18.6	101.7	1044036	1044037	1044034	795.5	688.833	785.167	699.5	7	14.7	15.4	1044032
44	NaN	NaN	13.6	NaN	NaN	13.6	106.7	1044040	1044041	1044035	586.5	668.833	570.5	666.5	7	19.7	15.4	1044032
44	16.5	NaN	NaN	16.9	NaN	NaN	52.9	1044043	1044044	104405	572.833	869.5	567.5	888.5	4	18.8	16.5	104402
44	16.6	NaN	NaN	17.2	NaN	NaN	69.4	1044045	1044046	1044043	813.5	845.5	796.833	845.167	5	16.5	18.8	104405
44	13.8	NaN	NaN	14.8	NaN	NaN	86	1044047	1044048	1044045	801.167	698.5	802.833	716.5	6	16.6	16.5	1044043
44	NaN	NaN	20.5	18.8	NaN	NaN	99.8	1044049	1044050	1044047	822.167	499.5	817.167	512.5	7	13.8	16.6	1044045
44	NaN	NaN	1.7	NaN	NaN	1.7	118.6	1044052	1044053	1044050	717.5	412.833	709.5	426.5	8	18.8	13.8	1044047
44	NaN	NaN	19.5	NaN	NaN	19.5	100.8	1044054	1044055	1044048	1075.5	858.833	1062.83	838.5	7	14.8	16.6	1044045
44	16.3	NaN	NaN	16.6	NaN	NaN	86.6	1044058	1044059	1044046	772.5	886.167	766.5	899.167	6	17.2	16.5	1044043
44	NaN	NaN	17.4	NaN	NaN	17.4	102.9	1044060	1044061	1044058	815.167	825.833	801.833	827.5	7	16.3	17.2	1044046
44	NaN	NaN	17.1	NaN	NaN	17.1	103.2	1044064	1044065	1044059	762.833	895.5	761.5	917.833	7	16.6	17.2	1044046
44	17	NaN	NaN	17.8	NaN	NaN	69.8	1044068	1044069	1044044	789.5	738	772.5	738.5	5	16.9	18.8	104405
44	16.5	NaN	NaN	17.9	NaN	NaN	86.8	1044070	1044071	1044068	892.833	819.5	879.5	827.833	6	17	16.9	1044044
44	NaN	NaN	15.6	NaN	NaN	15.6	104.7	1044074	1044075	1044071	904.167	843.167	877.5	846.833	7	17.9	17	1044068
44	NaN	NaN	17	NaN	NaN	17	103.3	1044078	1044079	1044070	908.167	749.167	894.5	748.833	7	16.5	17	1044068
44	16.8	NaN	NaN	16.5	NaN	NaN	87.6	1044082	1044083	1044069	883.167	751.167	871.167	761.5	6	17.8	16.9	1044044
44	NaN	NaN	15.9	NaN	NaN	15.9	104.4	1044084	1044085	1044082	957.5	838.5	944.167	833.5	7	16.8	17.8	1044069
44	NaN	NaN	16.2	NaN	NaN	16.2	104.1	1044087	1044088	1044083	922.167	701.167	904.5	708.167	7	16.5	17.8	1044069
44	15.6	NaN	NaN	14.5	NaN	NaN	32.3	1044091	1044092	104403	597.5	902	585	884.5	3	14.7	NaN	104401
44	18.9	NaN	NaN	15.9	NaN	NaN	47.9	1044093	1044094	1044091	670.5	1049.5	666	1027.5	4	15.6	14.7	104403
44	14	NaN	NaN	14.7	NaN	NaN	66.8	1044095	1044096	1044093	663	1148	647.5	1138.5	5	18.9	15.6	1044091
44	NaN	NaN	3.8	NaN	NaN	3.2	80.8	1044097	1044098	1044095	820	1270	812	1294.5	6	14	18.9	1044093
44	14.8	NaN	NaN	19.3	NaN	NaN	81.5	10440101	10440102	1044096	525.5	1112.5	501	1110.5	6	14.7	18.9	1044093
44	NaN	NaN	7.6	19.2	NaN	NaN	96.3	10440103	10440104	10440101	575	1237.5	561.5	1250.5	7	14.8	14.7	1044096
44	NaN	NaN	4.8	NaN	NaN	4.8	115.5	10440106	10440107	10440104	487	1340	468	1336.5	8	19.2	14.8	10440101
44	NaN	NaN	19.5	NaN	NaN	19.5	100.8	10440108	10440109	10440102	432	1260.5	422.5	1273.5	7	19.3	14.7	1044096
44	16.3	NaN	NaN	14.9	NaN	NaN	63.8	10440112	10440113	1044094	681.5	754	681.5	741.5	5	15.9	15.6	1044091
44	14.6	NaN	NaN	15	NaN	NaN	80.1	10440114	10440115	10440112	840	463.5	827	467	6	16.3	15.9	1044094
44	20.5	NaN	NaN	16.1	NaN	NaN	94.7	10440116	10440117	10440114	925	448	912	440.5	7	14.6	16.3	10440112
44	NaN	NaN	5.1	NaN	NaN	5.1	115.2	10440118	10440119	10440116	725	406.5	717	418.5	8	20.5	14.6	10440114
44	NaN	NaN	9.5	NaN	NaN	9.5	110.8	10440120	10440121	10440117	755	431.5	749	412	8	16.1	14.6	10440114
44	16	NaN	NaN	18.8	NaN	NaN	95.1	10440122	10440123	10440115	871.5	211.5	858.5	195.5	7	15	16.3	10440112
44	NaN	NaN	9.2	NaN	NaN	9.2	111.1	10440124	10440125	10440122	864	106.5	857	121.5	8	16	15	10440115
44	NaN	NaN	6.4	NaN	NaN	6.4	113.9	10440126	10440127	10440123	738.5	104.5	723.5	112.5	8	18.8	15	10440115
44	14.4	NaN	NaN	14.7	NaN	NaN	78.7	10440128	10440129	10440113	737	772	727.5	789.5	6	14.9	15.9	1044094
44	18	NaN	NaN	16.5	NaN	NaN	93.1	10440130	10440131	10440128	749.5	501.5	741	514	7	14.4	14.9	10440113
44	NaN	NaN	9.2	NaN	NaN	9.2	111.1	10440132	10440133	10440130	833.5	641	819	638	8	18	14.4	10440128
44	NaN	NaN	10.7	NaN	NaN	10.7	109.6	10440134	10440135	10440131	655	666	643	669.5	8	16.5	14.4	10440128
44	17	NaN	NaN	15.8	NaN	NaN	93.4	10440137	10440136	10440129	857	872.5	872	877.5	7	14.7	14.9	10440113
44	NaN	NaN	9.9	NaN	NaN	9.9	110.4	10440138	10440139	10440137	931	856.5	924	842.5	8	17	14.7	10440129
44	NaN	NaN	11.1	NaN	NaN	11.1	109.2	10440140	10440141	10440136	1065	791.5	1051.5	789.5	8	15.8	14.7	10440129
44	15.6	NaN	NaN	16.8	NaN	NaN	46.8	10440142	10440143	1044092	701	857	679	844	4	14.5	14.7	104403
44	15.2	NaN	NaN	17.1	NaN	NaN	62.4	10440144	10440145	10440142	726.167	702.5	706.167	698.5	5	15.6	14.5	1044092
44	16	NaN	NaN	15.7	NaN	NaN	77.6	10440146	10440147	10440144	837.5	510.5	828.833	519.833	6	15.2	15.6	10440142
44	21.5	NaN	NaN	16.7	NaN	NaN	93.6	10440148	10440149	10440146	819.167	381.5	809.167	405.167	7	16	15.2	10440144
44	NaN	NaN	5.2	NaN	NaN	5.2	115.1	10440150	10440151	10440148	797.833	389.5	792.833	373.833	8	21.5	16	10440146
44	NaN	NaN	10	NaN	NaN	10	110.3	10440152	10440153	10440149	578.5	397.5	577.167	415.833	8	16.7	16	10440146
44	16.6	NaN	NaN	18	NaN	NaN	93.3	10440154	10440155	10440147	1050.83	428.833	1039.17	439.5	7	15.7	15.2	10440144
44	NaN	NaN	10.4	NaN	NaN	10.4	109.9	10440156	10440157	10440154	996.5	481.833	983.5	491.167	8	16.6	15.7	10440147
44	NaN	NaN	9	NaN	NaN	9	111.3	10440158	10440159	10440155	1138.17	509.833	1122.83	501.5	8	18	15.7	10440147
44	16.7	NaN	NaN	17.6	NaN	NaN	79.5	10440160	10440161	10440145	604	824	600.5	802	6	17.1	15.6	10440142
44	15.1	NaN	NaN	16.5	NaN	NaN	96.2	10440162	10440163	10440160	472	650.5	449.5	649	7	16.7	17.1	10440145
44	NaN	NaN	9	NaN	NaN	9	111.3	10440164	10440165	10440162	479.5	742	478	730	8	15.1	16.7	10440160
44	NaN	NaN	7.6	NaN	NaN	7.6	112.7	10440166	10440167	10440163	455.5	694.5	441	692	8	16.5	16.7	10440160
44	17.8	NaN	NaN	15.2	NaN	NaN	97.1	10440168	10440169	10440161	685.5	699	671	680.5	7	17.6	17.1	10440145
44	NaN	NaN	5.4	NaN	NaN	5.4	114.9	10440170	10440171	10440168	670.5	512	667.5	528	8	17.8	17.6	10440161
44	NaN	NaN	8	NaN	NaN	8	112.3	10440172	10440173	10440169	717.5	676.5	712	666.5	8	15.2	17.6	10440161
44	16.2	NaN	NaN	21	NaN	NaN	63.6	10440174	10440175	10440143	587.167	769.833	567.833	773.167	5	16.8	14.5	1044092
44	19.1	NaN	NaN	20.6	NaN	NaN	79.8	10440176	10440177	10440174	505	597.5	490.5	588	6	16.2	16.8	10440143
44	16.6	NaN	NaN	19.1	NaN	NaN	98.9	10440178	10440179	10440176	405.5	602.5	406	621.5	7	19.1	16.2	10440174
44	NaN	NaN	4.8	NaN	NaN	4.8	115.5	10440180	10440181	10440178	359.833	758.167	347.5	768.833	8	16.6	19.1	10440176
44	NaN	NaN	2.3	NaN	NaN	2.3	118	10440182	10440183	10440179	371.5	613.5	366.5	627.5	8	19.1	19.1	10440176
44	18.4	NaN	NaN	NaN	NaN	19.9	100.4	10440184	10440185	10440177	395.167	538.833	393.833	557.833	7	20.6	16.2	10440174
44	NaN	NaN	1.5	NaN	NaN	1.5	118.8	10440186	10440187	10440184	443.167	516.5	440.5	500.167	8	18.4	20.6	10440177
44	15.7	NaN	NaN	16	NaN	NaN	84.6	10440189	10440190	10440175	511	739.5	491.5	753.5	6	21	16.8	10440143
44	17.9	NaN	NaN	NaN	NaN	20	100.3	10440191	10440192	10440189	657.5	829	646	846.5	7	15.7	21	10440175
44	NaN	NaN	2.1	NaN	NaN	2.1	118.2	10440193	10440194	10440191	660.5	704	657.5	723.5	8	17.9	15.7	10440189
44	NaN	NaN	19.7	19.1	NaN	NaN	100.6	10440196	10440197	10440190	621.5	570.5	607.5	576.5	7	16	21	10440175
44	NaN	NaN	0.6	NaN	NaN	0.6	119.7	10440199	10440200	10440197	550	610	549	629	8	19.1	16	10440190
44	13.8	NaN	NaN	14.7	NaN	NaN	88.5	10440201	10440202	1044033	849.5	667.5	833	658	6	16.9	16.7	104407
44	NaN	NaN	18	NaN	NaN	18	102.3	10440203	10440204	10440201	1016.17	746.833	1001.5	750.167	7	13.8	16.9	1044033
44	NaN	NaN	17.1	NaN	NaN	17.1	103.2	10440207	10440208	10440202	877.5	544.833	863.833	549.833	7	14.7	16.9	1044033
45	15.1	NaN	NaN	15.4	NaN	NaN	19.9	104502	104503	104501	608.5	923	608	899	2	NaN	NaN	1045000
45	19.1	NaN	NaN	16.3	NaN	NaN	35	104504	104505	104502	512.5	1247.5	508.5	1229	3	15.1	NaN	104501
45	NaN	NaN	15.3	NaN	NaN	7.2	54.1	104506	104507	104504	560	1249.5	542.5	1252	4	19.1	15.1	104502
45	NaN	NaN	0.6	16.6	NaN	NaN	51.3	1045010	1045011	104505	493	1325	492	1343	4	16.3	15.1	104502
45	17.8	NaN	NaN	NaN	NaN	15.3	67.9	1045013	1045014	1045011	540.5	1286.25	533.75	1298.25	5	16.6	16.3	104505
45	14.9	NaN	NaN	18.3	NaN	NaN	85.7	1045015	1045016	1045013	796.5	1279.5	775.5	1288.5	6	17.8	16.6	1045011
45	NaN	NaN	19.7	NaN	NaN	19.7	100.6	1045017	1045018	1045015	1048.5	1132.75	1041.25	1114.25	7	14.9	17.8	1045013
45	NaN	NaN	16.3	NaN	NaN	16.3	104	1045021	1045022	1045016	869.5	1033	862	1046.75	7	18.3	17.8	1045013
45	16.1	NaN	NaN	16.6	NaN	NaN	35.3	1045024	1045025	104503	388.5	1017.5	381.5	1038	3	15.4	NaN	104501
45	16.4	NaN	NaN	17.6	NaN	NaN	51.4	1045026	1045027	1045024	394.5	1071.5	379	1060.5	4	16.1	15.4	104503
45	15.9	NaN	NaN	17.4	NaN	NaN	67.8	1045028	1045029	1045026	157	1183.5	156.5	1167	5	16.4	16.1	1045024
45	NaN	NaN	3.3	NaN	NaN	4.1	83.7	1045030	1045031	1045028	36.5	1316.5	30.5	1334	6	15.9	16.4	1045026
45	NaN	NaN	2.8	21.7	NaN	NaN	85.2	1045034	1045035	1045029	230	1351.5	226	1351	6	17.4	16.4	1045026
45	NaN	NaN	13.4	NaN	NaN	13.4	106.9	1045037	1045038	1045035	331.5	1181.5	314	1173.5	7	21.7	17.4	1045029
45	20.8	NaN	NaN	19.5	NaN	NaN	69	1045040	1045041	1045027	503.5	1047.5	493	1063	5	17.6	16.1	1045024
45	19.6	NaN	NaN	16	NaN	NaN	89.8	1045042	1045043	1045040	643	1055.5	641.5	1074.5	6	20.8	17.6	1045027
45	NaN	NaN	10.9	NaN	NaN	10.9	109.4	1045044	1045045	1045042	763	1165	749.5	1165.5	7	19.6	20.8	1045040
45	NaN	NaN	14.5	NaN	NaN	14.5	105.8	1045046	1045047	1045043	932	1005.5	929	1023.5	7	16	20.8	1045040
45	16.9	NaN	NaN	16.5	NaN	NaN	88.5	1045048	1045049	1045041	543.5	1296	536	1266	6	19.5	17.6	1045027
45	NaN	13.6	NaN	NaN	NaN	14.9	105.4	1045050	1045051	1045048	270	1174	251.5	1175.5	7	16.9	19.5	1045041
45	NaN	NaN	15.3	NaN	NaN	15.3	105	1045054	1045055	1045049	279	1234	263	1226	7	16.5	19.5	1045041
45	18.4	NaN	NaN	16.6	NaN	NaN	51.9	1045058	1045059	1045025	477	1223.5	463.5	1213.5	4	16.6	15.4	104503
45	17.9	NaN	NaN	20.8	NaN	NaN	70.3	1045060	1045061	1045058	621.5	1298.5	613.5	1311.5	5	18.4	16.6	1045025
45	NaN	NaN	7.1	NaN	NaN	2.9	88.2	1045062	1045063	1045060	791	1279	778.5	1295.5	6	17.9	18.4	1045058
45	NaN	NaN	0.8	NaN	NaN	0.8	91.1	1045066	1045067	1045061	525	1338	519	1348.5	6	20.8	18.4	1045058
45	17.8	NaN	NaN	20.9	NaN	NaN	68.5	1045069	1045070	1045059	729.5	1087	712	1096.5	5	16.6	16.6	1045025
45	14.2	NaN	NaN	15.7	NaN	NaN	86.3	1045071	1045072	1045069	596.5	1241	582	1222.5	6	17.8	16.6	1045059
45	NaN	NaN	19.8	NaN	16.8	NaN	100.5	1045073	1045074	1045071	765	1223	742.5	1213.5	7	14.2	17.8	1045069
45	NaN	NaN	18.3	NaN	NaN	18.3	102	1045077	1045078	1045072	690	1190.5	674	1198	7	15.7	17.8	1045069
45	NaN	NaN	21.2	17.8	NaN	NaN	89.4	1045081	1045082	1045070	850.5	1165.5	832	1154.5	6	20.9	16.6	1045059
45	NaN	NaN	0.8	NaN	NaN	4	107.2	1045084	1045085	1045082	767.5	1351.5	758.5	1345.5	7	17.8	20.9	1045070
