# Supplementary material for: Hidden long-range memories of growth and cycle speed correlate cell cycles in lineage trees
Source: eLife. 2020 Jan 23;9:e51002. doi: 10.7554/eLife.51002 (PMC7018508; doi:10.7554/eLife.51002)
Supplement: Figure 4—source data 1. [file elife-51002-fig4-data1.xlsx]

## Sheet: -myc1
Lineage ID	Sibling 1 cycle length	Sibling 1 time to death	Sibling 1 time to cell loss	Sibling 2 cycle length	Sibling 2 time to death	Sibling 2 time to cell loss	Birth time	Sibling 1 ID	Sibling 2 ID	Mother ID	Generation	Mother cycle length	Grandmother cycle length	Grandmother ID
1	19.6667	NaN	NaN	22.8333	NaN	NaN	10.5	10102	10103	10101	2	NaN	NaN	101000
1	23	NaN	NaN	20.5	NaN	NaN	30.1667	10105	10106	10102	3	19.6667	NaN	10101
1	NaN	NaN	18.8333	24.6667	NaN	NaN	53.1667	10108	10109	10105	4	23	19.6667	10102
1	39.6667	NaN	NaN	37.3333	NaN	NaN	77.8333	101013	101014	10109	5	24.6667	23	10105
1	NaN	NaN	7.83333	NaN	NaN	7.83333	117.5	101015	101016	101013	6	39.6667	24.6667	10109
1	NaN	NaN	10.1667	NaN	NaN	10.1667	115.167	101020	101021	101014	6	37.3333	24.6667	10109
1	20.8333	NaN	NaN	20.8333	NaN	NaN	50.6667	101024	101025	10106	4	20.5	19.6667	10102
1	22	NaN	NaN	29.6667	NaN	NaN	71.5	101026	101027	101024	5	20.8333	20.5	10106
1	26.6667	NaN	NaN	NaN	NaN	31.8333	93.5	101028	101029	101026	6	22	20.8333	101024
1	NaN	NaN	5.16667	NaN	NaN	5.16667	120.167	101031	101032	101028	7	26.6667	22	101026
1	23.6667	NaN	NaN	23.3333	NaN	NaN	71.5	101036	101037	101025	5	20.8333	20.5	10106
1	NaN	NaN	30.1667	NaN	NaN	30.1667	95.1667	101038	101039	101036	6	23.6667	20.8333	101025
1	NaN	NaN	30.5	27.6667	NaN	NaN	94.8333	101043	101044	101037	6	23.3333	20.8333	101025
1	NaN	NaN	2.83333	NaN	NaN	2.83333	122.5	101046	101047	101044	7	27.6667	23.3333	101037
1	NaN	NaN	24.1667	NaN	NaN	24.1667	101.167	101050	101051	101027	6	29.6667	20.8333	101024
1	31.5	NaN	NaN	32.1667	NaN	NaN	33.3333	101056	101055	10103	3	22.8333	NaN	10101
1	34.6667	NaN	NaN	29.1667	NaN	NaN	64.8333	101058	101059	101056	4	31.5	22.8333	10103
1	NaN	NaN	25.8333	NaN	NaN	25.8333	99.5	101061	101062	101058	5	34.6667	31.5	101056
1	NaN	NaN	31.3333	NaN	NaN	31.3333	94	101067	101066	101059	5	29.1667	31.5	101056
1	36.1667	NaN	NaN	NaN	NaN	59.8333	65.5	101071	101072	101055	4	32.1667	22.8333	10103
1	NaN	NaN	23.6667	NaN	NaN	23.6667	101.667	101074	101075	101071	5	36.1667	32.1667	101055
2	27.5	NaN	NaN	29.1667	NaN	NaN	15.6667	10202	10203	10201	2	NaN	NaN	102000
2	NaN	NaN	82.1667	51.5	NaN	NaN	43.1667	10205	10206	10202	3	27.5	NaN	10201
2	NaN	NaN	30.6667	NaN	NaN	30.6667	94.6667	102011	102012	10206	4	51.5	27.5	10202
2	17.1667	NaN	NaN	17.6667	NaN	NaN	44.8333	102016	102017	10203	3	29.1667	NaN	10201
2	NaN	NaN	7.5	26.8333	NaN	NaN	62	102020	102019	102016	4	17.1667	29.1667	10203
2	33.6667	NaN	NaN	35.6667	NaN	NaN	88.8333	102023	102024	102019	5	26.8333	17.1667	102016
2	NaN	NaN	2.83333	NaN	NaN	2.83333	122.5	102026	102027	102023	6	33.6667	26.8333	102019
2	NaN	NaN	0.833333	NaN	NaN	0.833333	124.5	102031	102032	102024	6	35.6667	26.8333	102019
2	NaN	NaN	6.83333	NaN	NaN	22.8333	62.5	102036	102037	102017	4	17.6667	29.1667	10203
5	NaN	NaN	4.16667	NaN	NaN	4.16667	12.1667	10502	10503	10501	2	NaN	NaN	105000
7	20	NaN	NaN	22.8333	NaN	NaN	22.5	10703	10704	10701	2	NaN	NaN	107000
7	NaN	NaN	2.33333	29.3333	NaN	NaN	42.5	10706	10707	10703	3	20	NaN	10701
7	NaN	NaN	1	NaN	NaN	23.3333	71.8333	107011	107010	10707	4	29.3333	20	10703
7	NaN	NaN	23	28.3333	NaN	NaN	45.3333	107016	107017	10704	3	22.8333	NaN	10701
7	NaN	NaN	12.3333	25.1667	NaN	NaN	73.6667	107021	107022	107017	4	28.3333	22.8333	10704
7	NaN	NaN	26.5	NaN	NaN	17.5	98.8333	107025	107026	107022	5	25.1667	28.3333	107017
8	26	NaN	NaN	22.5	NaN	NaN	10.3333	10802	10803	10801	2	NaN	NaN	108000
8	21	NaN	NaN	21	NaN	NaN	36.3333	10805	10806	10802	3	26	NaN	10801
8	35.8333	NaN	NaN	34	NaN	NaN	57.3333	10808	10809	10805	4	21	26	10802
8	NaN	10.8333	NaN	NaN	10.8333	NaN	93.1667	108011	108012	10808	5	35.8333	21	10805
8	NaN	NaN	34	NaN	NaN	34	91.3333	108015	108016	10809	5	34	21	10805
8	37.3333	NaN	NaN	38.5	NaN	NaN	57.3333	108020	108021	10806	4	21	26	10802
8	NaN	NaN	30.6667	NaN	NaN	30.6667	94.6667	108022	108023	108020	5	37.3333	21	10806
8	NaN	NaN	8.66667	NaN	NaN	8.66667	95.8333	108026	108027	108021	5	38.5	21	10806
8	21	NaN	NaN	24.1667	NaN	NaN	32.8333	108031	108032	10803	3	22.5	NaN	10801
8	29.3333	NaN	NaN	30	NaN	NaN	53.8333	108034	108035	108031	4	21	22.5	10803
8	38.1667	NaN	NaN	28.8333	NaN	NaN	83.1667	108037	108038	108034	5	29.3333	21	108031
8	NaN	NaN	4	NaN	NaN	4	121.333	108040	108041	108037	6	38.1667	29.3333	108034
8	NaN	NaN	13.3333	NaN	NaN	13.3333	112	108045	108046	108038	6	28.8333	29.3333	108034
8	NaN	NaN	15.6667	NaN	NaN	15.8333	57	108050	108051	108032	4	24.1667	22.5	10803
8	NaN	NaN	7	NaN	NaN	41.5	83.8333	108056	108057	108035	5	30	21	108031
13	NaN	NaN	1.83333	NaN	NaN	5.83333	19	101303	101304	101301	2	NaN	NaN	1013000
14	21.8333	NaN	NaN	30.5	NaN	NaN	8	101402	101403	101401	2	NaN	NaN	1014000
14	23.1667	NaN	NaN	25.5	NaN	NaN	29.8333	101405	101406	101402	3	21.8333	NaN	101401
14	48	NaN	NaN	NaN	NaN	28	53	101408	101409	101405	4	23.1667	21.8333	101402
14	NaN	NaN	24.3333	NaN	NaN	24.3333	101	1014011	1014012	101408	5	48	23.1667	101405
14	26.1667	NaN	NaN	24.8333	NaN	NaN	55.3333	1014017	1014018	101406	4	25.5	21.8333	101402
14	NaN	NaN	43.8333	NaN	NaN	43.8333	81.5	1014020	1014021	1014017	5	26.1667	25.5	101406
14	NaN	NaN	45.1667	NaN	NaN	45.1667	80.1667	1014026	1014027	1014018	5	24.8333	25.5	101406
14	NaN	NaN	86.8333	36.3333	NaN	NaN	38.5	1014030	1014031	101403	3	30.5	NaN	101401
14	NaN	NaN	50.5	36.1667	NaN	NaN	74.8333	1014035	1014036	1014031	4	36.3333	30.5	101403
14	NaN	NaN	14.3333	NaN	NaN	14.3333	111	1014040	1014041	1014036	5	36.1667	36.3333	1014031
15	24.6667	NaN	NaN	24.1667	NaN	NaN	11	101502	101503	101501	2	NaN	NaN	1015000
15	18	NaN	NaN	22	NaN	NaN	35.6667	101505	101506	101502	3	24.6667	NaN	101501
15	NaN	NaN	6.16667	NaN	NaN	9	53.6667	101508	101509	101505	4	18	24.6667	101502
15	37.1667	NaN	NaN	30.6667	NaN	NaN	57.6667	1015013	1015014	101506	4	22	24.6667	101502
15	27.5	NaN	NaN	29.5	NaN	NaN	94.8333	1015016	1015017	1015013	5	37.1667	22	101506
15	NaN	NaN	3	NaN	NaN	3	122.333	1015020	1015019	1015016	6	27.5	37.1667	1015013
15	NaN	NaN	1	NaN	NaN	1	124.333	1015025	1015026	1015017	6	29.5	37.1667	1015013
15	NaN	NaN	37	NaN	NaN	10	88.3333	1015030	1015031	1015014	5	30.6667	22	101506
15	19.5	NaN	NaN	25.6667	NaN	NaN	35.1667	1015035	1015036	101503	3	24.1667	NaN	101501
15	NaN	NaN	13.5	NaN	NaN	18.1667	54.6667	1015038	1015039	1015035	4	19.5	24.1667	101503
15	NaN	NaN	6.83333	NaN	NaN	13	60.8333	1015044	1015045	1015036	4	25.6667	24.1667	101503
16	33.8333	NaN	NaN	NaN	NaN	97.1667	21.1667	101603	101604	101601	2	NaN	NaN	1016000
16	NaN	NaN	70.3333	NaN	37.5	NaN	55	101606	101607	101603	3	33.8333	NaN	101601
17	NaN	NaN	14.8333	NaN	NaN	17.3333	10.5	101702	101703	101701	2	NaN	NaN	1017000
18	NaN	NaN	108.667	NaN	NaN	10.6667	16.6667	101803	101804	101801	2	NaN	NaN	1018000
19	28.5	NaN	NaN	NaN	NaN	12	26	101903	101904	101901	2	NaN	NaN	1019000
19	NaN	NaN	2.5	NaN	NaN	44.6667	54.5	101907	101908	101903	3	28.5	NaN	101901
20	23.3333	NaN	NaN	NaN	NaN	28.3333	13.1667	102002	102003	102001	2	NaN	NaN	1020000
20	NaN	NaN	23.1667	24.5	NaN	NaN	36.5	102005	102006	102002	3	23.3333	NaN	102001
20	25.1667	NaN	NaN	21.8333	NaN	NaN	61	1020011	1020010	102006	4	24.5	23.3333	102002
20	NaN	NaN	0.166667	32.5	NaN	NaN	86.1667	1020014	1020013	1020011	5	25.1667	24.5	102006
20	NaN	NaN	6.66667	NaN	NaN	6.66667	118.667	1020016	1020017	1020013	6	32.5	25.1667	1020011
20	NaN	NaN	23.6667	30.1667	NaN	NaN	82.8333	1020022	1020021	1020010	5	21.8333	24.5	102006
20	NaN	NaN	12.3333	NaN	NaN	12.3333	113	1020025	1020026	1020021	6	30.1667	21.8333	1020010
21	18	NaN	NaN	18.3333	NaN	NaN	7.5	102102	102103	102101	2	NaN	NaN	1021000
21	32.5	NaN	NaN	39	NaN	NaN	25.5	102104	102105	102102	3	18	NaN	102101
21	NaN	NaN	60.8333	21.8333	NaN	NaN	64.5	1021010	1021011	102105	4	39	18	102102
21	NaN	NaN	39	NaN	NaN	39	86.3333	1021013	1021014	1021011	5	21.8333	39	102105
21	NaN	NaN	4.16667	NaN	NaN	10.3333	58	102108	102109	102104	4	32.5	18	102102
21	NaN	NaN	0.5	NaN	NaN	0.5	25.8333	102106	102107	102103	3	18.3333	NaN	102101
22	NaN	NaN	55	34.8333	NaN	NaN	13.3333	102202	102203	102201	2	NaN	NaN	1022000
22	NaN	NaN	77.1667	37.8333	NaN	NaN	48.1667	102205	102206	102203	3	34.8333	NaN	102201
22	NaN	NaN	39.3333	NaN	NaN	39.3333	86	102208	102209	102206	4	37.8333	34.8333	102203
23	21	NaN	NaN	20.6667	NaN	NaN	15	102302	102303	102301	2	NaN	NaN	1023000
23	53	NaN	NaN	23.6667	NaN	NaN	36	102305	102306	102302	3	21	NaN	102301
23	27.5	NaN	NaN	34	NaN	NaN	89	102308	102309	102305	4	53	21	102302
23	NaN	NaN	8.83333	NaN	NaN	8.83333	116.5	1023011	1023012	102308	5	27.5	53	102305
23	NaN	NaN	2.33333	NaN	NaN	2.33333	123	1023016	1023017	102309	5	34	53	102305
23	NaN	NaN	8.16667	40.8333	NaN	NaN	59.6667	1023020	1023021	102306	4	23.6667	21	102302
23	NaN	NaN	24.8333	NaN	NaN	24.8333	100.5	1023024	1023025	1023021	5	40.8333	23.6667	102306
23	NaN	NaN	89.6667	21.6667	NaN	NaN	35.6667	1023028	1023029	102303	3	20.6667	NaN	102301
23	48.1667	NaN	NaN	NaN	NaN	68	57.3333	1023033	1023034	1023029	4	21.6667	20.6667	102303
23	NaN	NaN	19.8333	NaN	NaN	19.8333	105.5	1023036	1023037	1023033	5	48.1667	21.6667	1023029
24	NaN	NaN	16.8333	29	NaN	NaN	37.8333	102403	102404	102401	2	NaN	NaN	1024000
24	NaN	NaN	1.5	NaN	NaN	16.1667	66.8333	102407	102408	102404	3	29	NaN	102401
25	22.5	NaN	NaN	21.3333	NaN	NaN	19.1667	102502	102503	102501	2	NaN	NaN	1025000
25	40	NaN	NaN	30.1667	NaN	NaN	41.6667	102505	102506	102502	3	22.5	NaN	102501
25	32	NaN	NaN	35.1667	NaN	NaN	81.6667	102508	102509	102505	4	40	22.5	102502
25	NaN	NaN	11.6667	NaN	NaN	11.6667	113.667	1025011	1025012	102508	5	32	40	102505
25	NaN	NaN	8.5	NaN	NaN	4.83333	116.833	1025016	1025017	102509	5	35.1667	40	102505
25	34.5	NaN	NaN	34.5	NaN	NaN	71.8333	1025021	1025022	102506	4	30.1667	22.5	102502
25	NaN	NaN	19	NaN	NaN	19	106.333	1025024	1025025	1025021	5	34.5	30.1667	102506
25	NaN	NaN	7.83333	NaN	NaN	59	40.5	1025029	1025030	102503	3	21.3333	NaN	102501
25	NaN	NaN	19	NaN	NaN	19	106.333	1025035	1025036	1025022	5	34.5	30.1667	102506
26	22	NaN	NaN	23.6667	NaN	NaN	8.33333	102602	102603	102601	2	NaN	NaN	1026000
26	22.6667	NaN	NaN	NaN	NaN	0.166667	30.3333	102605	102606	102602	3	22	NaN	102601
26	23.3333	NaN	NaN	29.8333	NaN	NaN	53	102608	102609	102605	4	22.6667	22	102602
26	NaN	NaN	49	NaN	NaN	36.1667	76.3333	1026011	1026012	102608	5	23.3333	22.6667	102605
26	NaN	NaN	42.5	NaN	NaN	42.5	82.8333	1026016	1026017	102609	5	29.8333	22.6667	102605
26	NaN	NaN	93.3333	NaN	NaN	93.3333	32	1026021	1026022	102603	3	23.6667	NaN	102601
27	NaN	NaN	107.167	21	NaN	NaN	18.1667	102702	102703	102701	2	NaN	NaN	1027000
27	28.6667	NaN	NaN	NaN	NaN	86.1667	39.1667	102707	102708	102703	3	21	NaN	102701
27	24	NaN	NaN	44.3333	NaN	NaN	67.8333	1027010	1027011	102707	4	28.6667	21	102703
27	NaN	NaN	33.5	NaN	NaN	33.5	91.8333	1027013	1027014	1027010	5	24	28.6667	102707
27	NaN	NaN	12	NaN	NaN	12.1667	112.167	1027020	1027021	1027011	5	44.3333	28.6667	102707
28	25.8333	NaN	NaN	21.6667	NaN	NaN	18	102802	102803	102801	2	NaN	NaN	1028000
28	NaN	NaN	79.3333	NaN	NaN	79.5	43.8333	102805	102806	102802	3	25.8333	NaN	102801
28	NaN	NaN	12.1667	20.3333	NaN	NaN	39.6667	1028010	1028011	102803	3	21.6667	NaN	102801
28	32.3333	NaN	NaN	NaN	NaN	65.3333	60	1028015	1028014	1028011	4	20.3333	21.6667	102803
28	NaN	NaN	33	NaN	NaN	33	92.3333	1028018	1028019	1028015	5	32.3333	20.3333	1028011
29	NaN	NaN	5.83333	NaN	NaN	3	38.3333	102902	102903	102901	2	NaN	NaN	1029000
30	25.1667	NaN	NaN	27.1667	NaN	NaN	9.33333	103002	103003	103001	2	NaN	NaN	1030000
30	37.5	NaN	NaN	28	NaN	NaN	34.5	103005	103006	103002	3	25.1667	NaN	103001
30	NaN	NaN	53.3333	35.8333	NaN	NaN	72	103008	103009	103005	4	37.5	25.1667	103002
30	NaN	NaN	17.5	NaN	NaN	17.5	107.833	1030013	1030014	103009	5	35.8333	37.5	103005
30	NaN	NaN	3.16667	NaN	NaN	13.3333	62.5	1030018	1030019	103006	4	28	25.1667	103002
30	30.3333	NaN	NaN	29.6667	NaN	NaN	36.5	1030023	1030024	103003	3	27.1667	NaN	103001
30	36.6667	NaN	NaN	29	NaN	NaN	66.8333	1030026	1030027	1030023	4	30.3333	27.1667	103003
30	NaN	NaN	21.8333	NaN	NaN	21.8333	103.5	1030029	1030030	1030026	5	36.6667	30.3333	1030023
30	29	NaN	NaN	NaN	NaN	14	66.1667	1030034	1030035	1030024	4	29.6667	27.1667	103003
30	25.1667	NaN	NaN	25.1667	NaN	NaN	95.1667	1030037	1030038	1030034	5	29	29.6667	1030024
30	NaN	NaN	5	NaN	NaN	5	120.333	1030040	1030041	1030037	6	25.1667	29	1030034
30	NaN	NaN	29.5	NaN	NaN	29.5	95.8333	1030045	1030046	1030027	5	29	30.3333	1030023
30	NaN	NaN	5	NaN	NaN	5	120.333	1030055	1030056	1030038	6	25.1667	29	1030034
31	22.3333	NaN	NaN	22.3333	NaN	NaN	6.16667	20102	20103	20101	2	NaN	NaN	201000
31	23.6667	NaN	NaN	25.1667	NaN	NaN	28.5	20104	20105	20102	3	22.3333	NaN	20101
31	17	NaN	NaN	27.3333	NaN	NaN	52.1667	20106	20107	20104	4	23.6667	22.3333	20102
31	20.5	NaN	NaN	20.5	NaN	NaN	69.1667	20108	20109	20106	5	17	23.6667	20104
31	22.1667	NaN	NaN	27	NaN	NaN	89.6667	201010	201011	20108	6	20.5	17	20106
31	30.3333	NaN	NaN	31.8333	NaN	NaN	111.833	201012	201013	201010	7	22.1667	20.5	20108
31	NaN	NaN	24.5	NaN	NaN	24.5	142.167	201014	201015	201012	8	30.3333	22.1667	201010
31	NaN	NaN	23	NaN	NaN	23	143.667	201016	201017	201013	8	31.8333	22.1667	201010
31	NaN	NaN	36.8333	48.3333	NaN	NaN	116.667	201018	201019	201011	7	27	20.5	20108
31	NaN	NaN	1.66667	NaN	NaN	1.66667	165	201021	201022	201019	8	48.3333	27	201011
31	29.6667	NaN	NaN	32.6667	NaN	NaN	89.6667	201023	201024	20109	6	20.5	17	20106
31	20	NaN	NaN	21.8333	NaN	NaN	119.333	201025	201026	201023	7	29.6667	20.5	20109
31	NaN	NaN	0.333333	NaN	NaN	0.333333	139.333	2010155	2010156	201025	8	20	29.6667	201023
31	NaN	NaN	25.5	NaN	NaN	25.5	141.167	2010158	2010159	201026	8	21.8333	29.6667	201023
31	23.8333	NaN	NaN	23.8333	NaN	NaN	122.333	201027	201028	201024	7	32.6667	20.5	20109
31	NaN	NaN	20.5	NaN	NaN	20.5	146.167	2010162	2010163	201027	8	23.8333	32.6667	201024
31	NaN	NaN	20.5	NaN	NaN	20.5	146.167	2010165	2010166	201028	8	23.8333	32.6667	201024
31	29.6667	NaN	NaN	30.8333	NaN	NaN	79.5	201029	201030	20107	5	27.3333	23.6667	20104
31	20.1667	NaN	NaN	21.6667	NaN	NaN	109.167	201031	201032	201029	6	29.6667	27.3333	20107
31	NaN	20.5	NaN	26.1667	NaN	NaN	129.333	201033	201034	201031	7	20.1667	29.6667	201029
31	NaN	NaN	11.1667	NaN	NaN	11.1667	155.5	2010170	2010171	201034	8	26.1667	20.1667	201031
31	NaN	11.1667	NaN	NaN	NaN	35.8333	130.833	201035	201036	201032	7	21.6667	29.6667	201029
31	18.8333	NaN	NaN	17.6667	NaN	NaN	110.333	201037	201038	201030	6	30.8333	27.3333	20107
31	NaN	NaN	37.5	32.1667	NaN	NaN	129.167	201039	201040	201037	7	18.8333	30.8333	201030
31	NaN	NaN	5.33333	NaN	NaN	5.33333	161.333	2010176	2010177	201040	8	32.1667	18.8333	201037
31	NaN	NaN	8.83333	NaN	NaN	14.6667	128	201041	201042	201038	7	17.6667	30.8333	201030
31	25.6667	NaN	NaN	20.8333	NaN	NaN	53.6667	201043	201044	20105	4	25.1667	22.3333	20102
31	23.3333	NaN	NaN	21	NaN	NaN	79.3333	201045	201046	201043	5	25.6667	25.1667	20105
31	29.3333	NaN	NaN	21.3333	NaN	NaN	102.667	201047	201048	201045	6	23.3333	25.6667	201043
31	31.6667	NaN	NaN	NaN	NaN	16.1667	132	201049	201050	201047	7	29.3333	23.3333	201045
31	NaN	NaN	3	NaN	NaN	3	163.667	2010181	2010182	201049	8	31.6667	29.3333	201047
31	38.1667	NaN	NaN	NaN	NaN	42.6667	124	201051	201052	201048	7	21.3333	23.3333	201045
31	NaN	NaN	4.5	NaN	NaN	4.5	162.167	2010184	2010185	201051	8	38.1667	21.3333	201048
31	26.8333	NaN	NaN	26.1667	NaN	NaN	100.333	201053	201054	201046	6	21	25.6667	201043
31	24.6667	NaN	NaN	NaN	NaN	3.66667	127.167	201055	201056	201053	7	26.8333	21	201046
31	NaN	NaN	14.8333	NaN	NaN	14.8333	151.833	2010187	2010188	201055	8	24.6667	26.8333	201053
31	21.6667	NaN	NaN	NaN	NaN	19.8333	126.5	201057	201058	201054	7	26.1667	21	201046
31	NaN	NaN	18.5	NaN	NaN	18.5	148.167	2010190	2010191	201057	8	21.6667	26.1667	201054
31	24.5	NaN	NaN	21.6667	NaN	NaN	74.5	201059	201060	201044	5	20.8333	25.1667	20105
31	31.3333	NaN	NaN	33.8333	NaN	NaN	99	201061	201062	201059	6	24.5	20.8333	201044
31	NaN	NaN	36.3333	NaN	NaN	36.3333	130.333	201063	201064	201061	7	31.3333	24.5	201059
31	NaN	NaN	15	29	NaN	NaN	132.833	201065	201066	201062	7	33.8333	24.5	201059
31	NaN	NaN	4.83333	NaN	NaN	4.83333	161.833	2010197	2010196	201066	8	29	33.8333	201062
31	34	NaN	NaN	NaN	NaN	25.1667	96.1667	201067	201068	201060	6	21.6667	20.8333	201044
31	25.3333	NaN	NaN	27.8333	NaN	NaN	130.167	201069	201070	201067	7	34	21.6667	201060
31	NaN	NaN	11.1667	NaN	NaN	11.1667	155.5	2010199	2010200	201069	8	25.3333	34	201067
31	NaN	NaN	8.66667	NaN	NaN	8.66667	158	2010202	2010203	201070	8	27.8333	34	201067
31	24.6667	NaN	NaN	19.3333	NaN	NaN	28.5	201072	201073	20103	3	22.3333	NaN	20101
31	26	NaN	NaN	33.1667	NaN	NaN	53.1667	201074	201075	201072	4	24.6667	22.3333	20103
31	40.6667	NaN	NaN	34	NaN	NaN	79.1667	201076	201077	201074	5	26	24.6667	201072
31	NaN	NaN	23	42.3333	NaN	NaN	119.833	201078	201079	201076	6	40.6667	26	201074
31	NaN	NaN	4.5	NaN	NaN	4.5	162.167	201081	201082	201079	7	42.3333	40.6667	201076
31	19.8333	NaN	NaN	24.3333	NaN	NaN	113.167	201083	201084	201077	6	34	26	201074
31	NaN	NaN	33.6667	NaN	NaN	33.6667	133	201085	201086	201083	7	19.8333	34	201077
31	NaN	NaN	29.1667	NaN	NaN	29.1667	137.5	201087	201088	201084	7	24.3333	34	201077
31	NaN	NaN	80.3333	37.6667	NaN	NaN	86.3333	201089	201090	201075	5	33.1667	24.6667	201072
31	23.1667	NaN	NaN	NaN	NaN	42.6667	124	201092	201093	201090	6	37.6667	33.1667	201075
31	NaN	NaN	19.5	NaN	NaN	19.5	147.167	2010208	2010209	201092	7	23.1667	37.6667	201090
31	NaN	NaN	25.3333	23	NaN	NaN	47.8333	201094	201095	201073	4	19.3333	22.3333	20103
31	NaN	NaN	8	37.1667	NaN	NaN	70.8333	201097	201098	201095	5	23	19.3333	201073
31	24	NaN	NaN	21.5	NaN	NaN	108	2010100	2010101	201098	6	37.1667	23	201095
31	NaN	NaN	16.5	NaN	NaN	34.6667	132	2010102	2010103	2010100	7	24	37.1667	201098
31	NaN	NaN	12.8333	29.6667	NaN	NaN	129.5	2010104	2010105	2010101	7	21.5	37.1667	201098
31	NaN	NaN	7.5	NaN	NaN	7.5	159.167	2010214	2010215	2010105	8	29.6667	21.5	2010101
32	NaN	NaN	5.16667	23.3333	NaN	NaN	8.33333	20202	20203	20201	2	NaN	NaN	202000
32	23.3333	NaN	NaN	25.3333	NaN	NaN	31.6667	20205	20206	20203	3	23.3333	NaN	20201
32	20.1667	NaN	NaN	14.8333	NaN	NaN	55	20207	20208	20205	4	23.3333	23.3333	20203
32	NaN	NaN	13.3333	NaN	NaN	11.8333	75.1667	20209	202010	20207	5	20.1667	23.3333	20205
32	16.1667	NaN	NaN	20.8333	NaN	NaN	69.8333	202013	202014	20208	5	14.8333	23.3333	20205
32	25.1667	NaN	NaN	29.8333	NaN	NaN	86	202015	202016	202013	6	16.1667	14.8333	20208
32	NaN	NaN	10.8333	NaN	NaN	55.5	111.167	202017	202018	202015	7	25.1667	16.1667	202013
32	NaN	NaN	50.8333	NaN	NaN	22.8333	115.833	202021	202022	202016	7	29.8333	16.1667	202013
32	NaN	NaN	14.6667	30.5	NaN	NaN	90.6667	202025	202026	202014	6	20.8333	14.8333	20208
32	NaN	NaN	2.16667	NaN	NaN	7	121.167	202028	202029	202026	7	30.5	20.8333	202014
32	25.3333	NaN	NaN	NaN	NaN	96.6667	57	202031	202032	20206	4	25.3333	23.3333	20203
32	28.8333	NaN	NaN	31.1667	NaN	NaN	82.3333	202033	202034	202031	5	25.3333	25.3333	20206
32	NaN	NaN	15.6667	26.1667	NaN	NaN	111.167	202035	202036	202033	6	28.8333	25.3333	202031
32	NaN	NaN	29.3333	NaN	NaN	10.3333	137.333	202039	202040	202036	7	26.1667	28.8333	202033
32	28.1667	NaN	NaN	24.1667	NaN	NaN	113.5	202041	202042	202034	6	31.1667	25.3333	202031
32	NaN	NaN	25	NaN	NaN	25	141.667	202043	202044	202041	7	28.1667	31.1667	202034
32	NaN	NaN	2.16667	NaN	25.6667	NaN	137.667	202045	202046	202042	7	24.1667	31.1667	202034
33	22.8333	NaN	NaN	25	NaN	NaN	8	20302	20303	20301	2	NaN	NaN	203000
33	NaN	NaN	1.33333	20	NaN	NaN	33	20306	20307	20303	3	25	NaN	20301
33	18.8333	NaN	NaN	16.8333	NaN	NaN	53	20308	20309	20307	4	20	25	20303
33	24.6667	NaN	NaN	NaN	NaN	10	71.8333	203010	203011	20308	5	18.8333	20	20307
33	NaN	NaN	3.66667	40.6667	NaN	NaN	96.5	203012	203013	203010	6	24.6667	18.8333	20308
33	NaN	NaN	29.5	NaN	NaN	29.5	137.167	203015	203016	203013	7	40.6667	24.6667	203010
33	NaN	NaN	19.8333	29.8333	NaN	NaN	69.8333	203018	203019	20309	5	16.8333	20	20307
33	27.5	NaN	NaN	26.8333	NaN	NaN	99.6667	203022	203021	203019	6	29.8333	16.8333	20309
33	NaN	NaN	4.16667	NaN	NaN	5.33333	127.167	203023	203024	203022	7	27.5	29.8333	203019
33	NaN	NaN	25.3333	NaN	NaN	15.5	126.5	203027	203028	203021	7	26.8333	29.8333	203019
33	20.1667	NaN	NaN	20.3333	NaN	NaN	30.8333	20304	20305	20302	3	22.8333	NaN	20301
33	27	NaN	NaN	23.1667	NaN	NaN	51	203031	203032	20304	4	20.1667	22.8333	20302
33	NaN	NaN	88.6667	NaN	NaN	88.6667	78	203033	203034	203031	5	27	20.1667	20304
33	20	NaN	NaN	17.3333	NaN	NaN	74.1667	203037	203038	203032	5	23.1667	20.1667	20304
33	NaN	NaN	7.5	NaN	NaN	9.33333	94.1667	203039	203040	203037	6	20	23.1667	203032
33	19.3333	NaN	NaN	18.3333	NaN	NaN	91.5	203043	203044	203038	6	17.3333	23.1667	203032
33	26.5	NaN	NaN	23.3333	NaN	NaN	110.833	203045	203046	203043	7	19.3333	17.3333	203038
33	26.3333	NaN	NaN	NaN	NaN	0.333333	137.333	203047	203048	203045	8	26.5	19.3333	203043
33	NaN	NaN	3	NaN	NaN	3	163.667	2030156	2030157	203047	9	26.3333	26.5	203045
33	25	NaN	NaN	25.5	NaN	NaN	134.167	203049	203050	203046	8	23.3333	19.3333	203043
33	NaN	NaN	7.5	NaN	NaN	7.5	159.167	2030169	2030170	203049	9	25	23.3333	203046
33	NaN	NaN	7	NaN	NaN	7	159.667	2030171	2030172	203050	9	25.5	23.3333	203046
33	NaN	NaN	2	NaN	NaN	2	109.833	203051	203052	203044	7	18.3333	17.3333	203038
33	24.8333	NaN	NaN	21.8333	NaN	NaN	51.1667	203055	203056	20305	4	20.3333	22.8333	20302
33	22.8333	NaN	NaN	22.5	NaN	NaN	76	203057	203058	203055	5	24.8333	20.3333	20305
33	24.6667	NaN	NaN	31.6667	NaN	NaN	98.8333	203059	203060	203057	6	22.8333	24.8333	203055
33	24.5	NaN	NaN	25.5	NaN	NaN	123.5	203061	203062	203059	7	24.6667	22.8333	203057
33	NaN	NaN	18.6667	NaN	NaN	18.6667	148	203063	203064	203061	8	24.5	24.6667	203059
33	NaN	NaN	17.6667	NaN	NaN	17.6667	149	203065	203066	203062	8	25.5	24.6667	203059
33	26	NaN	NaN	23.5	NaN	NaN	130.5	203067	203068	203060	7	31.6667	22.8333	203057
33	NaN	NaN	10.1667	NaN	NaN	10.1667	156.5	2030167	2030168	203067	8	26	31.6667	203060
33	NaN	NaN	12.6667	NaN	NaN	12.6667	154	2030165	2030166	203068	8	23.5	31.6667	203060
33	24.5	NaN	NaN	22.5	NaN	NaN	98.5	203069	203070	203058	6	22.5	24.8333	203055
33	24.8333	NaN	NaN	24.1667	NaN	NaN	123	203071	203072	203069	7	24.5	22.5	203058
33	NaN	NaN	18.8333	NaN	NaN	18.8333	147.833	203073	203074	203071	8	24.8333	24.5	203069
33	NaN	NaN	19.5	NaN	NaN	19.5	147.167	203075	203076	203072	8	24.1667	24.5	203069
33	24.3333	NaN	NaN	24	NaN	NaN	121	203077	203078	203070	7	22.5	22.5	203058
33	NaN	NaN	21.3333	NaN	NaN	21.3333	145.333	203079	203080	203077	8	24.3333	22.5	203070
33	NaN	NaN	21.6667	NaN	NaN	21.6667	145	203081	203082	203078	8	24	22.5	203070
33	22.6667	NaN	NaN	24.6667	NaN	NaN	73	203083	203084	203056	5	21.8333	20.3333	20305
33	20	NaN	NaN	21.3333	NaN	NaN	95.6667	203085	203086	203083	6	22.6667	21.8333	203056
33	NaN	NaN	24.3333	25	NaN	NaN	115.667	203087	203088	203085	7	20	22.6667	203083
33	NaN	NaN	26	NaN	NaN	26	140.667	203090	203091	203088	8	25	20	203085
33	23.1667	NaN	NaN	23.5	NaN	NaN	117	203092	203093	203086	7	21.3333	22.6667	203083
33	NaN	NaN	8.83333	NaN	NaN	26.5	140.167	203094	203095	203092	8	23.1667	21.3333	203086
33	NaN	NaN	0.333333	NaN	NaN	0.333333	140.5	203096	203097	203093	8	23.5	21.3333	203086
33	25.1667	NaN	NaN	22.5	NaN	NaN	97.6667	203098	203099	203084	6	24.6667	21.8333	203056
33	NaN	NaN	43.8333	NaN	NaN	43.8333	122.833	2030100	2030101	203098	7	25.1667	24.6667	203084
33	25	NaN	NaN	NaN	NaN	9.33333	120.167	2030102	2030103	203099	7	22.5	24.6667	203084
33	NaN	NaN	10.3333	NaN	NaN	21.5	145.167	2030105	2030106	2030102	8	25	22.5	203099
34	NaN	NaN	3.33333	19.5	NaN	NaN	11.8333	20402	20403	20401	2	NaN	NaN	204000
34	NaN	NaN	5.33333	29.3333	NaN	NaN	31.3333	20405	20406	20403	3	19.5	NaN	20401
34	35.8333	NaN	NaN	29.3333	NaN	NaN	60.6667	20408	20409	20406	4	29.3333	19.5	20403
34	26	NaN	NaN	43.6667	NaN	NaN	96.5	204010	204011	20408	5	35.8333	29.3333	20406
34	32.6667	NaN	NaN	NaN	NaN	44.1667	122.5	204012	204013	204010	6	26	35.8333	20408
34	NaN	NaN	11.5	NaN	NaN	11.5	155.167	204014	204015	204012	7	32.6667	26	204010
34	NaN	NaN	26.5	NaN	NaN	26.5	140.167	204016	204017	204011	6	43.6667	35.8333	20408
34	36.6667	NaN	NaN	NaN	NaN	38.3333	90	204019	204020	20409	5	29.3333	29.3333	20406
34	NaN	NaN	30.1667	NaN	NaN	37	126.667	204021	204022	204019	6	36.6667	29.3333	20409
35	18.6667	NaN	NaN	19.1667	NaN	NaN	17.5	20502	20503	20501	2	NaN	NaN	205000
35	26.5	NaN	NaN	22	NaN	NaN	36.6667	20506	20507	20503	3	19.1667	NaN	20501
35	19.6667	NaN	NaN	18.5	NaN	NaN	63.1667	20508	20509	20506	4	26.5	19.1667	20503
35	22.3333	NaN	NaN	26	NaN	NaN	82.8333	205010	205011	20508	5	19.6667	26.5	20506
35	NaN	NaN	22.3333	NaN	NaN	20.5	105.167	205012	205013	205010	6	22.3333	19.6667	20508
35	NaN	NaN	5.33333	20.3333	NaN	NaN	108.833	205016	205017	205011	6	26	19.6667	20508
35	NaN	NaN	0.833333	23.5	NaN	NaN	129.167	205019	205020	205017	7	20.3333	26	205011
35	NaN	NaN	14	NaN	NaN	14	152.667	205022	205023	205020	8	23.5	20.3333	205017
35	22.1667	NaN	NaN	21.8333	NaN	NaN	81.6667	205024	205025	20509	5	18.5	26.5	20506
35	NaN	NaN	14.8333	NaN	NaN	11.5	103.833	205026	205027	205024	6	22.1667	18.5	20509
35	18.8333	NaN	NaN	18	NaN	NaN	103.5	205030	205031	205025	6	21.8333	18.5	20509
35	24.5	NaN	NaN	21	NaN	NaN	122.333	205032	205033	205030	7	18.8333	21.8333	205025
35	NaN	NaN	19.8333	NaN	NaN	19.8333	146.833	205034	205035	205032	8	24.5	18.8333	205030
35	NaN	NaN	23.3333	NaN	NaN	23.3333	143.333	205036	205037	205033	8	21	18.8333	205030
35	18.1667	NaN	NaN	NaN	NaN	6.16667	121.5	205038	205039	205031	7	18	21.8333	205025
35	NaN	NaN	18.6667	NaN	NaN	27	139.667	205040	205041	205038	8	18.1667	18	205031
35	19.5	NaN	NaN	17	NaN	NaN	58.6667	205043	205044	20507	4	22	19.1667	20503
35	23.1667	NaN	NaN	22.8333	NaN	NaN	78.1667	205045	205046	205043	5	19.5	22	20507
35	33.1667	NaN	NaN	NaN	NaN	20.6667	101.333	205047	205048	205045	6	23.1667	19.5	205043
35	18	NaN	NaN	18.3333	NaN	NaN	134.5	205049	205050	205047	7	33.1667	23.1667	205045
35	NaN	NaN	14.1667	NaN	NaN	14.1667	152.5	205051	205052	205049	8	18	33.1667	205047
35	NaN	NaN	13.8333	NaN	NaN	13.8333	152.833	205053	205054	205050	8	18.3333	33.1667	205047
35	NaN	NaN	28	28.1667	NaN	NaN	101	205056	205057	205046	6	22.8333	19.5	205043
35	24.6667	NaN	NaN	22.6667	NaN	NaN	129.167	205059	205060	205057	7	28.1667	22.8333	205046
35	NaN	NaN	12.8333	NaN	NaN	12.8333	153.833	205061	205062	205059	8	24.6667	28.1667	205057
35	NaN	NaN	14.8333	NaN	NaN	14.8333	151.833	205063	205064	205060	8	22.6667	28.1667	205057
35	23.3333	NaN	NaN	47.8333	NaN	NaN	75.6667	205066	205067	205044	5	17	22	20507
35	NaN	NaN	16.1667	NaN	NaN	30.3333	99	205068	205069	205066	6	23.3333	17	205044
35	26	NaN	NaN	20.1667	NaN	NaN	123.5	205072	205073	205067	6	47.8333	17	205044
35	NaN	NaN	17.1667	NaN	NaN	17.1667	149.5	205074	205075	205072	7	26	47.8333	205067
35	NaN	NaN	23	NaN	NaN	23	143.667	205076	205077	205073	7	20.1667	47.8333	205067
35	19.8333	NaN	NaN	21	NaN	NaN	36.1667	20505	20504	20502	3	18.6667	NaN	20501
35	23	NaN	NaN	23.6667	NaN	NaN	56	205078	205079	20505	4	19.8333	18.6667	20502
35	28.1667	NaN	NaN	25.1667	NaN	NaN	79	205080	205081	205078	5	23	19.8333	20505
35	22.5	NaN	NaN	30.3333	NaN	NaN	107.167	205082	205083	205080	6	28.1667	23	205078
35	NaN	NaN	37	NaN	NaN	37	129.667	205084	205085	205082	7	22.5	28.1667	205080
35	NaN	NaN	0.333333	NaN	NaN	0.333333	137.5	205088	205089	205083	7	30.3333	28.1667	205080
35	NaN	NaN	1.16667	NaN	NaN	8.5	104.167	205090	205091	205081	6	25.1667	23	205078
35	20.8333	NaN	NaN	24.5	NaN	NaN	79.6667	205094	205095	205079	5	23.6667	19.8333	20505
35	NaN	NaN	3.16667	NaN	NaN	5.66667	100.5	205096	205097	205094	6	20.8333	23.6667	205079
35	29.3333	NaN	NaN	NaN	NaN	62.5	104.167	2050100	2050101	205095	6	24.5	23.6667	205079
35	NaN	NaN	21.1667	27.6667	NaN	NaN	133.5	2050102	2050103	2050100	7	29.3333	24.5	205095
35	NaN	NaN	5.5	NaN	NaN	5.5	161.167	2050105	2050106	2050103	8	27.6667	29.3333	2050100
35	27	NaN	NaN	NaN	NaN	17.8333	57.1667	2050108	2050109	20504	4	21	18.6667	20502
35	17.5	NaN	NaN	18.3333	NaN	NaN	84.1667	2050110	2050111	2050108	5	27	21	20504
35	NaN	NaN	65	NaN	37.3333	NaN	101.667	2050112	2050113	2050110	6	17.5	27	2050108
35	NaN	NaN	34.1667	NaN	62.3333	NaN	102.5	2050117	2050116	2050111	6	18.3333	27	2050108
36	22	NaN	NaN	NaN	NaN	14.1667	16.1667	20603	20604	20601	2	NaN	NaN	206000
36	46.3333	NaN	NaN	NaN	NaN	8.83333	38.1667	20606	20607	20603	3	22	NaN	20601
36	NaN	NaN	4.83333	NaN	NaN	24.3333	84.5	20609	206010	20606	4	46.3333	22	20603
37	NaN	NaN	17.6667	17.6667	NaN	NaN	20.5	20702	20703	20701	2	NaN	NaN	207000
37	21.1667	NaN	NaN	NaN	NaN	16.6667	38.1667	20707	20708	20703	3	17.6667	NaN	20701
37	51.1667	NaN	NaN	22.6667	NaN	NaN	59.3333	207010	207011	20707	4	21.1667	17.6667	20703
37	NaN	41.3333	NaN	NaN	41.3333	NaN	110.5	207013	207014	207010	5	51.1667	21.1667	20707
37	25.3333	NaN	NaN	27.5	NaN	NaN	82	207017	207018	207011	5	22.6667	21.1667	20707
37	32	NaN	NaN	45.5	NaN	NaN	107.333	207020	207021	207017	6	25.3333	22.6667	207011
37	NaN	NaN	11.3333	NaN	NaN	27.3333	139.333	207023	207024	207020	7	32	25.3333	207017
37	NaN	NaN	55.8333	NaN	NaN	55.8333	109.5	207028	207029	207018	6	27.5	22.6667	207011
37	NaN	NaN	13.8333	NaN	NaN	13.8333	152.833	207032	207033	207021	7	45.5	25.3333	207017
38	NaN	NaN	10.3333	NaN	NaN	126.833	5.16667	20802	20803	20801	2	NaN	NaN	208000
39	25.5	NaN	NaN	21.6667	NaN	NaN	9.83333	20901	20902	20903	2	NaN	NaN	209000
39	21.8333	NaN	NaN	28.1667	NaN	NaN	35.3333	20905	20906	20901	3	25.5	NaN	20903
39	24	NaN	NaN	23.8333	NaN	NaN	57.1667	20908	20909	20905	4	21.8333	25.5	20901
39	NaN	NaN	0.333333	NaN	NaN	0.333333	81.1667	209011	209012	20908	5	24	21.8333	20905
39	20.6667	NaN	NaN	NaN	NaN	17	31.5	209014	209015	20902	3	21.6667	NaN	20903
39	30.5	NaN	NaN	31.8333	NaN	NaN	52.1667	209017	209018	209014	4	20.6667	21.6667	20902
39	26.3333	NaN	NaN	NaN	NaN	84	82.6667	209020	209021	209017	5	30.5	20.6667	209014
39	NaN	NaN	57.6667	NaN	NaN	23.3333	109	209023	209024	209020	6	26.3333	30.5	209017
39	24.3333	NaN	NaN	22.6667	NaN	NaN	81	209027	209028	20909	5	23.8333	21.8333	20905
39	NaN	NaN	46.3333	NaN	NaN	61.3333	105.333	209030	209031	209027	6	24.3333	23.8333	20909
39	20.3333	NaN	NaN	19.3333	NaN	NaN	103.667	209036	209037	209028	6	22.6667	23.8333	20909
39	22.5	NaN	NaN	17.3333	NaN	NaN	84	209045	209044	209018	5	31.8333	20.6667	209014
39	29.3333	NaN	NaN	32	NaN	NaN	106.5	209047	209048	209045	6	22.5	31.8333	209018
39	NaN	NaN	30.8333	NaN	NaN	30.8333	135.833	209050	209051	209047	7	29.3333	22.5	209045
39	NaN	NaN	23.6667	NaN	NaN	19.3333	123	209055	209056	209037	7	19.3333	22.6667	209028
39	NaN	NaN	42.6667	NaN	NaN	42.6667	124	209039	209040	209036	7	20.3333	22.6667	209028
39	NaN	NaN	28.1667	NaN	NaN	28.1667	138.5	209062	209063	209048	7	32	22.5	209045
39	22.1667	NaN	NaN	20.8333	NaN	NaN	101.333	209066	209067	209044	6	17.3333	31.8333	209018
39	NaN	NaN	14.8333	27.6667	NaN	NaN	123.5	209069	209070	209066	7	22.1667	17.3333	209044
39	NaN	NaN	15.5	NaN	NaN	15.5	151.167	209073	209074	209070	8	27.6667	22.1667	209066
39	NaN	NaN	6.66667	23.1667	NaN	NaN	122.167	209077	209078	209067	7	20.8333	17.3333	209044
39	NaN	NaN	21.3333	NaN	NaN	21.3333	145.333	209083	209084	209078	8	23.1667	20.8333	209067
39	30	NaN	NaN	24.1667	NaN	NaN	63.5	209086	209087	20906	4	28.1667	25.5	20901
39	NaN	NaN	39.5	38.5	NaN	NaN	93.5	209089	209090	209086	5	30	28.1667	20906
39	NaN	NaN	79	49.3333	NaN	NaN	87.6667	209093	209094	209087	5	24.1667	28.1667	20906
39	24.3333	NaN	NaN	34.3333	NaN	NaN	132	209098	209099	209090	6	38.5	30	209086
39	NaN	NaN	10.3333	NaN	NaN	10.3333	156.333	2090101	2090102	209098	7	24.3333	38.5	209090
39	NaN	NaN	0.333333	NaN	NaN	0.333333	166.333	2090104	2090105	209099	7	34.3333	38.5	209090
39	NaN	NaN	0.833333	23.8333	NaN	NaN	137	2090107	2090108	209094	6	49.3333	24.1667	209087
39	NaN	NaN	5.83333	NaN	NaN	5.83333	160.833	2090110	2090111	2090108	7	23.8333	49.3333	209094
40	20.5	NaN	NaN	20.6667	NaN	NaN	24	201001	201002	201003	2	NaN	NaN	2010000
40	23.8333	NaN	NaN	25	NaN	NaN	44.5	201005	201006	201001	3	20.5	NaN	201003
40	NaN	NaN	29.8333	NaN	NaN	13.6667	68.3333	201008	201009	201005	4	23.8333	20.5	201001
40	23	NaN	NaN	24.3333	NaN	NaN	44.6667	2010013	2010014	201002	3	20.6667	NaN	201003
40	NaN	NaN	22	21.6667	NaN	NaN	67.6667	2010016	2010017	2010013	4	23	20.6667	201002
40	NaN	NaN	0.833333	24	NaN	NaN	89.3333	2010021	2010022	2010017	5	21.6667	23	2010013
40	23.8333	NaN	NaN	NaN	NaN	10.8333	113.333	2010025	2010026	2010022	6	24	21.6667	2010017
40	NaN	NaN	29.5	NaN	NaN	29.5	137.167	2010028	2010029	2010025	7	23.8333	24	2010022
40	34.3333	NaN	NaN	NaN	NaN	79.5	69.5	2010032	2010033	201006	4	25	20.5	201001
40	NaN	NaN	62.8333	NaN	NaN	36.3333	103.833	2010035	2010036	2010032	5	34.3333	25	201006
40	25.6667	NaN	NaN	25.1667	NaN	NaN	69	2010039	2010040	2010014	4	24.3333	20.6667	201002
40	15.6667	NaN	NaN	NaN	NaN	7.83333	94.6667	2010042	2010043	2010039	5	25.6667	24.3333	2010014
40	NaN	NaN	1.66667	NaN	NaN	4.5	110.333	2010044	2010045	2010042	6	15.6667	25.6667	2010039
40	NaN	NaN	9.33333	NaN	NaN	17.5	94.1667	2010053	2010054	2010040	5	25.1667	24.3333	2010014
41	NaN	NaN	8.5	19.3333	NaN	NaN	17.6667	201102	201103	201101	2	NaN	NaN	2011000
41	20.5	NaN	NaN	24	NaN	NaN	37	201106	201107	201103	3	19.3333	NaN	201101
41	16.5	NaN	NaN	22.3333	NaN	NaN	57.5	201109	2011010	201106	4	20.5	19.3333	201103
41	16	NaN	NaN	18.1667	NaN	NaN	74	2011012	2011013	201109	5	16.5	20.5	201106
41	19	NaN	NaN	18.5	NaN	NaN	90	2011015	2011016	2011012	6	16	16.5	201109
41	NaN	NaN	2.66667	24	NaN	NaN	109	2011018	2011019	2011015	7	19	16	2011012
41	NaN	NaN	33.6667	25.8333	NaN	NaN	133	2011022	2011023	2011019	8	24	19	2011015
41	NaN	NaN	3.83333	NaN	NaN	13.8333	61	2011027	2011028	201107	4	24	19.3333	201103
41	23	NaN	NaN	NaN	NaN	20	79.8333	2011032	2011033	2011010	5	22.3333	20.5	201106
41	30.8333	NaN	NaN	30.1667	NaN	NaN	102.833	2011035	2011036	2011032	6	23	22.3333	2011010
41	25	NaN	NaN	15.8333	NaN	NaN	133.667	2011038	2011039	2011035	7	30.8333	23	2011032
41	NaN	NaN	8	NaN	NaN	8	158.667	2011041	2011042	2011038	8	25	30.8333	2011035
41	18.8333	NaN	NaN	25.6667	NaN	NaN	92.1667	2011046	2011047	2011013	6	18.1667	16.5	201109
41	26	NaN	NaN	33	NaN	NaN	111	2011049	2011050	2011046	7	18.8333	18.1667	2011013
41	NaN	NaN	29.6667	24.3333	NaN	NaN	137	2011052	2011053	2011049	8	26	18.8333	2011046
41	22.1667	NaN	NaN	17.5	NaN	NaN	108.5	2011056	2011057	2011016	7	18.5	16	2011012
41	31.6667	NaN	NaN	30.8333	NaN	NaN	130.667	2011059	2011060	2011056	8	22.1667	18.5	2011016
41	NaN	NaN	4.33333	NaN	NaN	4.33333	162.333	2011062	2011063	2011059	9	31.6667	22.1667	2011056
41	NaN	NaN	5	NaN	NaN	7.83333	158.833	2011067	2011068	2011023	9	25.8333	24	2011019
41	29.3333	NaN	NaN	NaN	NaN	33.6667	133	2011074	2011075	2011036	7	30.1667	23	2011032
41	NaN	NaN	4.33333	NaN	NaN	4.33333	162.333	2011077	2011078	2011074	8	29.3333	30.1667	2011036
41	NaN	NaN	17.1667	NaN	NaN	17.1667	149.5	2011082	2011083	2011039	8	15.8333	30.8333	2011035
41	NaN	NaN	16.8333	23.6667	NaN	NaN	117.833	2011086	2011087	2011047	7	25.6667	18.1667	2011013
41	NaN	NaN	25.1667	NaN	NaN	25.1667	141.5	2011089	2011090	2011087	8	23.6667	25.6667	2011047
41	NaN	NaN	22.6667	NaN	NaN	17.1667	144	2011093	2011094	2011050	8	33	18.8333	2011046
41	NaN	NaN	5.33333	NaN	NaN	5.33333	161.333	2011098	2011099	2011053	9	24.3333	26	2011049
41	27.5	NaN	NaN	24.6667	NaN	NaN	126	20110103	20110104	2011057	8	17.5	18.5	2011016
41	NaN	NaN	11.3333	NaN	NaN	13.1667	153.5	20110106	20110107	20110103	9	27.5	17.5	2011057
41	NaN	NaN	3.33333	NaN	NaN	5.16667	161.5	20110111	20110112	2011060	9	30.8333	22.1667	2011056
41	NaN	NaN	16	NaN	NaN	16	150.667	20110119	20110120	20110104	9	24.6667	17.5	2011057
42	NaN	NaN	-16.3333	22.6667	NaN	NaN	58.5	201202	201203	201201	2	NaN	NaN	2012000
42	20	NaN	NaN	20.6667	NaN	NaN	81.1667	201205	201206	201203	3	22.6667	NaN	201201
42	21.1667	NaN	NaN	17.8333	NaN	NaN	101.167	201208	201209	201205	4	20	22.6667	201203
42	NaN	NaN	1.83333	19	NaN	NaN	122.333	2012011	2012012	201208	5	21.1667	20	201205
42	NaN	NaN	25.3333	24.5	NaN	NaN	141.333	2012015	2012016	2012012	6	19	21.1667	201208
42	NaN	NaN	2.16667	NaN	NaN	2.33333	101.833	2012020	2012021	201206	4	20.6667	22.6667	201203
42	21.1667	NaN	NaN	20.5	NaN	NaN	119	2012025	2012026	201209	5	17.8333	20	201205
42	NaN	NaN	26.5	NaN	NaN	26.5	140.167	2012028	2012029	2012025	6	21.1667	17.8333	201209
42	NaN	NaN	0.833333	NaN	NaN	0.833333	165.833	2012033	2012034	2012016	7	24.5	19	2012012
42	NaN	NaN	21.8333	NaN	NaN	27.1667	139.5	2012038	2012039	2012026	6	20.5	17.8333	201209
43	NaN	NaN	18.3333	27.1667	NaN	NaN	24.3333	201301	201302	201303	2	NaN	NaN	2013000
43	NaN	NaN	5	NaN	NaN	19.5	51.5	201306	201307	201302	3	27.1667	NaN	201303
44	23.6667	NaN	NaN	32.1667	NaN	NaN	96.8333	201401	201402	201404	2	NaN	NaN	2014000
44	31.6667	NaN	NaN	34.6667	NaN	NaN	120.5	201406	201407	201401	3	23.6667	NaN	201404
44	NaN	NaN	5.83333	NaN	NaN	11.5	155.167	2014010	2014011	201407	4	34.6667	23.6667	201401
44	NaN	NaN	16.8333	NaN	NaN	35.8333	129	2014015	2014016	201402	3	32.1667	NaN	201404
44	NaN	NaN	14.5	NaN	NaN	14.5	152.167	2014021	2014020	201406	4	31.6667	23.6667	201401
45	26.3333	NaN	NaN	24.5	NaN	NaN	32	201504	201505	201503	2	NaN	NaN	2015000
45	20.8333	NaN	NaN	25.5	NaN	NaN	56.5	201501	201502	201505	3	24.5	NaN	201503
45	17.8333	NaN	NaN	23.1667	NaN	NaN	77.3333	201508	201509	201501	4	20.8333	24.5	201505
45	22	NaN	NaN	22.6667	NaN	NaN	95.1667	2015011	2015012	201508	5	17.8333	20.8333	201501
45	22	NaN	NaN	31.1667	NaN	NaN	117.167	2015014	2015015	2015011	6	22	17.8333	201508
45	NaN	NaN	27.5	NaN	NaN	27.5	139.167	2015017	2015018	2015014	7	22	22	2015011
45	NaN	NaN	18.3333	NaN	NaN	18.3333	148.333	2015022	2015023	2015015	7	31.1667	22	2015011
45	36.6667	NaN	NaN	33.5	NaN	NaN	117.833	2015027	2015028	2015012	6	22.6667	17.8333	201508
45	NaN	NaN	12.1667	NaN	NaN	12.1667	154.5	2015030	2015031	2015027	7	36.6667	22.6667	2015012
45	28.5	NaN	NaN	29.3333	NaN	NaN	100.5	2015035	2015036	201509	5	23.1667	20.8333	201501
45	34.1667	NaN	NaN	31.8333	NaN	NaN	129	2015038	2015039	2015035	6	28.5	23.1667	201509
45	NaN	NaN	3.5	NaN	NaN	3.5	163.167	2015041	2015042	2015038	7	34.1667	28.5	2015035
45	17.3333	NaN	NaN	21.6667	NaN	NaN	82	2015046	2015047	201502	4	25.5	24.5	201505
45	18.5	NaN	NaN	22.5	NaN	NaN	99.3333	2015049	2015050	2015046	5	17.3333	25.5	201502
45	26.6667	NaN	NaN	25	NaN	NaN	58.3333	2015054	2015055	201504	3	26.3333	NaN	201503
45	24.3333	NaN	NaN	22	NaN	NaN	85	2015057	2015058	2015054	4	26.6667	26.3333	201504
45	NaN	NaN	2.33333	NaN	NaN	4.33333	109.333	2015060	2015061	2015057	5	24.3333	26.6667	2015054
45	NaN	NaN	15.3333	NaN	NaN	15.3333	151.333	2015065	2015066	2015028	7	33.5	22.6667	2015012
45	24.8333	NaN	NaN	30.8333	NaN	NaN	129.833	2015069	2015070	2015036	6	29.3333	23.1667	201509
45	NaN	NaN	12	NaN	NaN	12	154.667	2015072	2015073	2015069	7	24.8333	29.3333	2015036
45	NaN	NaN	5.83333	NaN	NaN	5.83333	160.833	2015076	2015077	2015039	7	31.8333	28.5	2015035
45	NaN	NaN	17.1667	NaN	NaN	23.6667	103.667	2015081	2015082	2015047	5	21.6667	25.5	201502
45	NaN	NaN	1.33333	NaN	NaN	32.6667	121.833	2015088	2015089	2015050	6	22.5	17.3333	2015046
45	26.1667	NaN	NaN	23.5	NaN	NaN	117.833	2015052	2015053	2015049	6	18.5	17.3333	2015046
45	NaN	NaN	22.6667	NaN	NaN	22.6667	144	2015094	2015095	2015052	7	26.1667	18.5	2015049
45	NaN	NaN	25.3333	NaN	NaN	25.3333	141.333	2015098	2015099	2015053	7	23.5	18.5	2015049
45	31.8333	NaN	NaN	25	NaN	NaN	83.3333	20150102	20150103	2015055	4	25	26.3333	201504
45	26.5	NaN	NaN	23.6667	NaN	NaN	115.167	20150105	20150106	20150102	5	31.8333	25	2015055
45	NaN	NaN	25	NaN	NaN	25	141.667	20150108	20150109	20150105	6	26.5	31.8333	20150102
45	21	NaN	NaN	NaN	43	NaN	107	20150111	20150112	2015058	5	22	26.6667	2015054
45	NaN	NaN	38.6667	NaN	NaN	38.6667	128	20150114	20150115	20150111	6	21	22	2015058
45	NaN	NaN	6	NaN	NaN	6	160.667	20150121	20150122	2015070	7	30.8333	29.3333	2015036
45	22.8333	NaN	NaN	29	NaN	NaN	108.333	20150127	20150128	20150103	5	25	25	2015055
45	NaN	NaN	35.5	NaN	NaN	35.5	131.167	20150130	20150131	20150127	6	22.8333	25	20150103
45	NaN	NaN	27.8333	NaN	NaN	27.8333	138.833	20150134	20150135	20150106	6	23.6667	31.8333	20150102
45	NaN	NaN	29.3333	NaN	NaN	29.3333	137.333	20150141	20150142	20150128	6	29	25	20150103
46	17	NaN	NaN	NaN	NaN	8.66667	53.8333	201602	201603	201604	2	NaN	NaN	2016000
46	NaN	NaN	1.33333	NaN	NaN	1.33333	70.8333	201608	201609	201602	3	17	NaN	201604
47	23	NaN	NaN	19.1667	NaN	NaN	28	201701	201702	201703	2	NaN	NaN	2017000
47	NaN	NaN	1	NaN	NaN	2.16667	51	201705	201706	201701	3	23	NaN	201703
47	19.1667	NaN	NaN	17.3333	NaN	NaN	47.1667	2017011	2017012	201702	3	19.1667	NaN	201703
47	21.6667	NaN	NaN	19.8333	NaN	NaN	66.3333	2017014	2017015	2017011	4	19.1667	19.1667	201702
47	NaN	NaN	25.1667	NaN	NaN	9.16667	88	2017017	2017018	2017014	5	21.6667	19.1667	2017011
47	NaN	NaN	12.5	NaN	NaN	5.16667	86.1667	2017023	2017024	2017015	5	19.8333	19.1667	2017011
47	22	NaN	NaN	20	NaN	NaN	64.5	2017028	2017029	2017012	4	17.3333	19.1667	201702
47	NaN	NaN	12.8333	23.5	NaN	NaN	86.5	2017031	2017032	2017028	5	22	17.3333	2017012
47	29.6667	NaN	NaN	30.1667	NaN	NaN	110	2017036	2017037	2017032	6	23.5	22	2017028
47	NaN	NaN	27	NaN	NaN	27	139.667	2017039	2017040	2017036	7	29.6667	23.5	2017032
47	18.6667	NaN	NaN	21	NaN	NaN	84.5	2017044	2017045	2017029	5	20	17.3333	2017012
47	NaN	NaN	11.6667	22.8333	NaN	NaN	103.167	2017047	2017048	2017044	6	18.6667	20	2017029
47	NaN	NaN	26.5	NaN	NaN	26.5	140.167	2017051	2017052	2017037	7	30.1667	23.5	2017032
47	41.8333	NaN	NaN	NaN	NaN	13.8333	105.5	2017056	2017057	2017045	6	21	20	2017029
47	NaN	NaN	19.3333	NaN	NaN	19.3333	147.333	2017059	2017060	2017056	7	41.8333	21	2017045
47	NaN	NaN	40.6667	NaN	NaN	40.6667	126	2017063	2017064	2017048	7	22.8333	18.6667	2017044

## Sheet: -myc2
Lineage ID	Sibling 1 cycle length	Sibling 1 time to death	Sibling 1 time to cell loss	Sibling 2 cycle length	Sibling 2 time to death	Sibling 2 time to cell loss	Birth time	Sibling 1 ID	Sibling 2 ID	Mother ID	Generation	Mother cycle length	Grandmother cycle length	Grandmother ID
1	22.5333	NaN	NaN	18.4	NaN	NaN	0	10102	10103	10101	2	NaN	NaN	101000
1	16.4	NaN	NaN	16.9333	NaN	NaN	22.5333	10105	10106	10102	3	22.5333	NaN	10101
1	NaN	NaN	13.2	28.2667	NaN	NaN	38.9333	10108	10109	10105	4	16.4	22.5333	10102
1	19.8667	NaN	NaN	26.9333	NaN	NaN	67.2	101012	101013	10109	5	28.2667	16.4	10105
1	NaN	NaN	28	NaN	NaN	4.53333	87.0667	101015	101016	101012	6	19.8667	28.2667	10109
1	19.4667	NaN	NaN	25.6	NaN	NaN	18.4	101020	101021	10103	3	18.4	NaN	10101
1	NaN	NaN	56.6667	59.4667	NaN	NaN	37.8667	101023	101024	101020	4	19.4667	18.4	10103
1	28.5333	NaN	NaN	23.7333	NaN	NaN	39.4667	101028	101029	10106	4	16.9333	22.5333	10102
1	25.7333	NaN	NaN	33.0667	NaN	NaN	68	101031	101032	101028	5	28.5333	16.9333	10106
1	NaN	42.4	NaN	32.5333	NaN	NaN	93.7333	101034	101035	101031	6	25.7333	28.5333	101028
1	NaN	26.1333	NaN	NaN	NaN	34.6667	94.1333	101038	101039	101013	6	26.9333	28.2667	10109
1	NaN	NaN	74.6667	NaN	NaN	97.4667	44	101042	101043	101021	4	25.6	18.4	10103
1	NaN	NaN	44.1333	NaN	NaN	11.7333	97.3333	101047	101048	101024	5	59.4667	19.4667	101020
1	32.9333	NaN	NaN	28.4	NaN	NaN	63.2	101051	101052	101029	5	23.7333	16.9333	10106
1	NaN	NaN	34.4	NaN	NaN	45.3333	96.1333	101054	101055	101051	6	32.9333	23.7333	101029
1	24.4	NaN	NaN	24.6667	NaN	NaN	101.067	101058	101059	101032	6	33.0667	28.5333	101028
1	NaN	NaN	16	NaN	NaN	16	125.467	101060	101061	101058	7	24.4	33.0667	101032
1	NaN	NaN	15.2	NaN	NaN	15.2	126.267	101062	101063	101035	7	32.5333	25.7333	101031
1	NaN	NaN	34.6667	NaN	15.3333	NaN	91.6	101068	101069	101052	6	28.4	23.7333	101029
1	NaN	NaN	15.7333	NaN	NaN	15.7333	125.733	101074	101075	101059	7	24.6667	33.0667	101032
2	18.4	NaN	NaN	19.0667	NaN	NaN	1.73333	10202	10203	10201	2	NaN	NaN	102000
2	29.4667	NaN	NaN	16.1333	NaN	NaN	20.1333	10205	10206	10202	3	18.4	NaN	10201
2	NaN	NaN	91.8667	NaN	NaN	91.8667	49.6	10208	10209	10205	4	29.4667	18.4	10202
2	19.3333	NaN	NaN	19.7333	NaN	NaN	36.2667	102013	102014	10206	4	16.1333	18.4	10202
2	30.5333	NaN	NaN	16	NaN	NaN	20.8	102019	102020	10203	3	19.0667	NaN	10201
2	NaN	NaN	90.1333	27.7333	NaN	NaN	51.3333	102022	102023	102019	4	30.5333	19.0667	10203
2	NaN	NaN	26.4	35.6	NaN	NaN	56	102027	102028	102014	5	19.7333	16.1333	10206
2	25.4667	NaN	NaN	24.6667	NaN	NaN	36.8	102031	102032	102020	4	16	19.0667	10203
2	30.4	NaN	NaN	27.0667	NaN	NaN	62.2667	102034	102035	102031	5	25.4667	16	102020
2	NaN	NaN	27.2	NaN	NaN	5.06667	92.6667	102037	102038	102034	6	30.4	25.4667	102031
2	19.3333	NaN	NaN	22	NaN	NaN	91.6	102044	102045	102028	6	35.6	19.7333	102014
2	NaN	NaN	30.5333	NaN	NaN	30.5333	110.933	102048	102047	102044	7	19.3333	35.6	102028
2	33.3333	NaN	NaN	34.9333	NaN	NaN	61.4667	102050	102051	102032	5	24.6667	16	102020
2	30.5333	NaN	NaN	NaN	NaN	46.6667	94.8	102053	102054	102050	6	33.3333	24.6667	102032
2	NaN	NaN	16.1333	NaN	NaN	16.1333	125.333	102055	102056	102053	7	30.5333	33.3333	102050
2	31.0667	NaN	NaN	NaN	NaN	37.4667	89.3333	102058	102059	102035	6	27.0667	25.4667	102031
2	NaN	NaN	21.0667	NaN	NaN	21.0667	120.4	102061	102062	102058	7	31.0667	27.0667	102035
2	NaN	NaN	22	NaN	NaN	21.0667	96.4	102065	102066	102051	6	34.9333	24.6667	102032
2	NaN	NaN	27.8667	NaN	NaN	27.8667	113.6	102069	102070	102045	7	22	35.6	102028
2	22.5333	NaN	NaN	20.5333	NaN	NaN	79.0667	102042	102041	102023	5	27.7333	30.5333	102019
2	NaN	NaN	39.8667	NaN	NaN	39.8667	101.6	102074	102075	102042	6	22.5333	27.7333	102023
2	NaN	NaN	41.8667	NaN	NaN	41.8667	99.6	102077	102078	102041	6	20.5333	27.7333	102023
2	NaN	NaN	85.8667	74.6667	NaN	NaN	55.6	102016	102017	102013	5	19.3333	16.1333	10206
2	NaN	NaN	11.2	NaN	NaN	11.2	130.267	102081	102082	102017	6	74.6667	19.3333	102013
3	23.8667	NaN	NaN	26.2667	NaN	NaN	1.06667	10302	10303	10301	2	NaN	NaN	103000
3	21.7333	NaN	NaN	NaN	NaN	21.8667	24.9333	10306	10307	10302	3	23.8667	NaN	10301
3	NaN	NaN	22.5333	21.3333	NaN	NaN	46.6667	10309	103010	10306	4	21.7333	23.8667	10302
3	NaN	NaN	2.26667	NaN	NaN	2.26667	68	103013	103014	103010	5	21.3333	21.7333	10306
3	24.5333	NaN	NaN	NaN	NaN	7.06667	27.3333	103019	103020	10303	3	26.2667	NaN	10301
3	NaN	NaN	32.4	32.5333	NaN	NaN	51.8667	103022	103023	103019	4	24.5333	26.2667	10303
3	NaN	NaN	0.266667	NaN	NaN	0.266667	84.4	103026	103027	103023	5	32.5333	24.5333	103019
4	18.1333	NaN	NaN	21.6	NaN	NaN	1.33333	10402	10403	10401	2	NaN	NaN	104000
4	22.5333	NaN	NaN	26.1333	NaN	NaN	19.4667	10405	10406	10402	3	18.1333	NaN	10401
4	NaN	NaN	18.1333	23.3333	NaN	NaN	42	10408	10409	10405	4	22.5333	18.1333	10402
4	27.2	NaN	NaN	26.5333	NaN	NaN	65.3333	104013	104014	10409	5	23.3333	22.5333	10405
4	NaN	NaN	48.9333	24.9333	NaN	NaN	92.5333	104016	104017	104013	6	27.2	23.3333	10409
4	NaN	NaN	24	NaN	NaN	24	117.467	104021	104022	104017	7	24.9333	27.2	104013
4	31.6	NaN	NaN	23.7333	NaN	NaN	91.8667	104024	104025	104014	6	26.5333	23.3333	10409
4	NaN	NaN	18	NaN	NaN	18	123.467	104026	104027	104024	7	31.6	26.5333	104014
4	NaN	NaN	25.8667	NaN	NaN	25.8667	115.6	104029	104030	104025	7	23.7333	26.5333	104014
4	18.2667	NaN	NaN	22.1333	NaN	NaN	45.6	104032	104033	10406	4	26.1333	18.1333	10402
4	NaN	NaN	77.6	43.6	NaN	NaN	63.8667	104035	104036	104032	5	18.2667	26.1333	10406
4	26.5333	NaN	NaN	28.8	NaN	NaN	22.9333	104040	104041	10403	3	21.6	NaN	10401
4	30.9333	NaN	NaN	33.6	NaN	NaN	49.4667	104043	104044	104040	4	26.5333	21.6	10403
4	NaN	NaN	1.46667	NaN	NaN	1.46667	80.4	104045	104046	104043	5	30.9333	26.5333	104040
4	NaN	NaN	34	NaN	NaN	34	107.467	104049	104050	104036	6	43.6	18.2667	104032
4	34.4	NaN	NaN	35.0667	NaN	NaN	67.7333	104052	104053	104033	5	22.1333	26.1333	10406
4	NaN	NaN	39.3333	NaN	NaN	39.3333	102.133	104055	104056	104052	6	34.4	22.1333	104033
4	NaN	NaN	38.6667	NaN	NaN	38.6667	102.8	104057	104058	104053	6	35.0667	22.1333	104033
4	23.3333	NaN	NaN	28.6667	NaN	NaN	51.7333	104060	104061	104041	4	28.8	21.6	10403
4	NaN	NaN	2.66667	NaN	NaN	3.6	75.0667	104064	104063	104060	5	23.3333	28.8	104041
4	22	NaN	NaN	NaN	NaN	10.2667	80.4	104068	104069	104061	5	28.6667	28.8	104041
4	NaN	NaN	39.0667	NaN	NaN	39.0667	102.4	104071	104072	104068	6	22	28.6667	104061
4	NaN	NaN	7.33333	22.2667	NaN	NaN	83.0667	104075	104076	104044	5	33.6	26.5333	104040
4	NaN	NaN	36.1333	NaN	NaN	36.1333	105.333	104079	104080	104076	6	22.2667	33.6	104044
5	23.0667	NaN	NaN	21.3333	NaN	NaN	5.86667	10502	10503	10501	2	NaN	NaN	105000
5	23.7333	NaN	NaN	33.3333	NaN	NaN	28.9333	10505	10506	10502	3	23.0667	NaN	10501
5	33.8667	NaN	NaN	31.0667	NaN	NaN	52.6667	10508	10509	10505	4	23.7333	23.0667	10502
5	39.2	NaN	NaN	NaN	NaN	50.4	86.5333	1050138	1050139	10508	5	33.8667	23.7333	10505
5	NaN	NaN	15.7333	NaN	NaN	15.7333	125.733	1050140	1050141	1050138	6	39.2	33.8667	10508
5	17.2	NaN	NaN	22.4	NaN	NaN	27.2	105020	105021	10503	3	21.3333	NaN	10501
5	16.1333	NaN	NaN	20	NaN	NaN	44.4	105023	105024	105020	4	17.2	21.3333	10503
5	26	NaN	NaN	16.4	NaN	NaN	60.5333	105026	105027	105023	5	16.1333	17.2	105020
5	29.7333	NaN	NaN	33.8667	NaN	NaN	86.5333	105029	105030	105026	6	26	16.1333	105023
5	NaN	NaN	4.26667	NaN	NaN	25.2	116.267	105032	105033	105029	7	29.7333	26	105026
5	29.3333	NaN	NaN	27.2	NaN	NaN	62.2667	105035	105036	10506	4	33.3333	23.0667	10502
5	NaN	NaN	22.2667	NaN	NaN	8.26667	91.6	105038	105039	105035	5	29.3333	33.3333	10506
5	25.0667	NaN	NaN	23.0667	NaN	NaN	83.7333	105043	105044	10509	5	31.0667	23.7333	10505
5	NaN	NaN	32.6667	NaN	NaN	32.6667	108.8	105046	105047	105043	6	25.0667	31.0667	10509
5	28.9333	NaN	NaN	25.4667	NaN	NaN	49.6	105058	105059	105021	4	22.4	21.3333	10503
5	24.1333	NaN	NaN	22.5333	NaN	NaN	78.5333	105061	105062	105058	5	28.9333	22.4	105021
5	21.8667	NaN	NaN	NaN	NaN	12.4	102.667	105063	105064	105061	6	24.1333	28.9333	105058
5	NaN	NaN	16.9333	NaN	NaN	16.9333	124.533	105065	105066	105063	7	21.8667	24.1333	105061
5	29.4667	NaN	NaN	30.1333	NaN	NaN	64.4	105068	105069	105024	5	20	17.2	105020
5	19.8667	NaN	NaN	20.4	NaN	NaN	93.8667	105071	105072	105068	6	29.4667	20	105024
5	NaN	NaN	27.7333	NaN	NaN	27.7333	113.733	105074	105075	105071	7	19.8667	29.4667	105068
5	18	NaN	NaN	17.4667	NaN	NaN	76.9333	105077	105078	105027	6	16.4	16.1333	105023
5	NaN	NaN	46.5333	NaN	NaN	36.2667	94.9333	105080	105081	105077	7	18	16.4	105027
5	NaN	NaN	21.0667	NaN	NaN	21.0667	120.4	105085	105086	105030	7	33.8667	26	105026
5	25.2	NaN	NaN	20	NaN	NaN	89.4667	105088	105089	105036	5	27.2	33.3333	10506
5	NaN	NaN	26.8	NaN	NaN	26.8	114.667	105091	105092	105088	6	25.2	27.2	105036
5	NaN	NaN	34.6667	NaN	NaN	34.6667	106.8	105095	105096	105044	6	23.0667	31.0667	10509
5	33.8667	NaN	NaN	32	NaN	NaN	75.0667	1050101	1050102	105059	5	25.4667	22.4	105021
5	NaN	NaN	32.5333	NaN	NaN	32.5333	108.933	1050104	1050105	1050101	6	33.8667	25.4667	105059
5	NaN	NaN	28.9333	28.5333	NaN	NaN	101.067	1050107	1050108	105062	6	22.5333	28.9333	105058
5	NaN	NaN	13.2	26.8	NaN	NaN	94.5333	1050111	1050112	105069	6	30.1333	20	105024
5	NaN	NaN	27.2	NaN	NaN	27.2	114.267	1050115	1050116	105072	7	20.4	29.4667	105068
5	26.9333	NaN	NaN	28.1333	NaN	NaN	94.4	1050118	1050119	105078	7	17.4667	16.4	105027
5	NaN	NaN	20.1333	NaN	NaN	20.1333	121.333	1050121	1050122	1050118	8	26.9333	17.4667	105078
5	NaN	NaN	18.9333	NaN	NaN	18.9333	122.533	1050124	1050125	1050119	8	28.1333	17.4667	105078
5	NaN	NaN	32	NaN	NaN	32	109.467	1050128	1050127	105089	6	20	27.2	105036
5	NaN	NaN	34.4	NaN	NaN	34.4	107.067	1050130	1050131	1050102	6	32	25.4667	105059
5	NaN	NaN	11.8667	NaN	NaN	11.8667	129.6	1050133	1050134	1050108	7	28.5333	22.5333	105062
5	NaN	NaN	20.1333	NaN	NaN	20.1333	121.333	1050137	1050136	1050112	7	26.8	30.1333	105069
6	NaN	90.4	NaN	NaN	NaN	58.5333	0.266667	10602	10603	10601	2	NaN	NaN	106000
7	26.2667	NaN	NaN	22.2667	NaN	NaN	1.86667	10702	10703	10701	2	NaN	NaN	107000
7	19.2	NaN	NaN	17.8667	NaN	NaN	28.1333	10705	10706	10702	3	26.2667	NaN	10701
7	NaN	NaN	22	NaN	NaN	7.06667	47.3333	10708	10709	10705	4	19.2	26.2667	10702
7	24.8	NaN	NaN	NaN	NaN	6.66667	46	107013	107014	10706	4	17.8667	26.2667	10702
7	37.7333	NaN	NaN	37.0667	NaN	NaN	70.8	107016	107017	107013	5	24.8	17.8667	10706
7	NaN	NaN	32.9333	NaN	NaN	32.9333	108.533	107019	107020	107016	6	37.7333	24.8	107013
7	NaN	NaN	23.8667	NaN	NaN	23.8667	24.1333	107021	107022	10703	3	22.2667	NaN	10701
7	NaN	NaN	33.6	NaN	NaN	33.6	107.867	107026	107027	107017	6	37.0667	24.8	107013
8	26.6667	NaN	NaN	21.3333	NaN	NaN	19.4667	10802	10803	10801	2	NaN	NaN	108000
8	20.9333	NaN	NaN	22.1333	NaN	NaN	46.1333	10805	10806	10802	3	26.6667	NaN	10801
8	NaN	NaN	74.4	22.8	NaN	NaN	67.0667	10808	10809	10805	4	20.9333	26.6667	10802
8	18.5333	NaN	NaN	23.8667	NaN	NaN	40.8	108012	108013	10803	3	21.3333	NaN	10801
8	NaN	NaN	18.6667	51.4667	NaN	NaN	59.3333	108015	108016	108012	4	18.5333	21.3333	10803
8	19.6	NaN	NaN	26.2667	NaN	NaN	68.2667	108019	108020	10806	4	22.1333	26.6667	10802
8	24.9333	NaN	NaN	19.3333	NaN	NaN	87.8667	108022	108023	108019	5	19.6	22.1333	10806
8	NaN	NaN	28.6667	NaN	NaN	28.6667	112.8	108025	108026	108022	6	24.9333	19.6	108019
8	23.6	NaN	NaN	21.0667	NaN	NaN	89.8667	108028	108029	10809	5	22.8	20.9333	10805
8	NaN	NaN	28	NaN	NaN	28	113.467	108031	108032	108028	6	23.6	22.8	10809
8	NaN	NaN	23.0667	38.1333	NaN	NaN	64.6667	108034	108035	108013	4	23.8667	21.3333	10803
8	NaN	NaN	30.6667	NaN	NaN	30.6667	110.8	108039	108040	108016	5	51.4667	18.5333	108012
8	25.2	NaN	NaN	34.9333	NaN	NaN	94.5333	108042	108043	108020	5	26.2667	22.1333	10806
8	NaN	NaN	21.7333	NaN	NaN	21.7333	119.733	108045	108046	108042	6	25.2	26.2667	108020
8	NaN	NaN	12	NaN	NaN	12	129.467	108048	108049	108043	6	34.9333	26.2667	108020
8	NaN	NaN	34.2667	NaN	NaN	34.2667	107.2	108051	108052	108023	6	19.3333	19.6	108019
8	NaN	NaN	30.5333	NaN	NaN	30.5333	110.933	108055	108054	108029	6	21.0667	22.8	10809
8	NaN	NaN	18.2667	NaN	NaN	12.5333	102.8	108057	108058	108035	5	38.1333	23.8667	108013
9	NaN	NaN	11.3333	NaN	NaN	15.6	1.86667	10902	10903	10901	2	NaN	NaN	109000
10	16.6667	NaN	NaN	16.2667	NaN	NaN	42.5333	101002	101003	101001	2	NaN	NaN	1010000
10	NaN	NaN	0.266667	NaN	NaN	0.266667	59.2	101005	101006	101002	3	16.6667	NaN	101001
10	NaN	NaN	3.73333	NaN	13.3333	NaN	58.8	101008	101009	101003	3	16.2667	NaN	101001
11	16.4	NaN	NaN	17.0667	NaN	NaN	4.66667	101102	101103	101101	2	NaN	NaN	1011000
11	19.2	NaN	NaN	16.8	NaN	NaN	21.0667	101105	101106	101102	3	16.4	NaN	101101
11	NaN	NaN	35.8667	NaN	96.2667	NaN	40.2667	101108	101109	101105	4	19.2	16.4	101102
11	NaN	NaN	11.0667	22.5333	NaN	NaN	21.7333	1011014	1011015	101103	3	17.0667	NaN	101101
11	23.0667	NaN	NaN	19.8667	NaN	NaN	44.2667	1011018	1011019	1011015	4	22.5333	17.0667	101103
11	32.2667	NaN	NaN	NaN	NaN	9.33333	67.3333	1011021	1011022	1011018	5	23.0667	22.5333	1011015
11	NaN	NaN	1.86667	NaN	NaN	1.86667	99.6	1011024	1011025	1011021	6	32.2667	23.0667	1011018
11	NaN	NaN	26.9333	23.7333	NaN	NaN	37.8667	1011028	1011029	101106	4	16.8	16.4	101102
11	22.4	NaN	NaN	19.4667	NaN	NaN	61.6	1011032	1011033	1011029	5	23.7333	16.8	101106
11	25.7333	NaN	NaN	23.8667	NaN	NaN	84	1011035	1011036	1011032	6	22.4	23.7333	1011029
11	NaN	NaN	31.7333	NaN	NaN	31.7333	109.733	1011038	1011039	1011035	7	25.7333	22.4	1011032
11	23.4667	NaN	NaN	20.4	NaN	NaN	64.1333	1011041	1011042	1011019	5	19.8667	22.5333	1011015
11	21.3333	NaN	NaN	20.5333	NaN	NaN	81.0667	1011048	1011049	1011033	6	19.4667	23.7333	1011029
11	28.2667	NaN	NaN	25.3333	NaN	NaN	102.4	1011051	1011052	1011048	7	21.3333	19.4667	1011033
11	NaN	NaN	10.8	NaN	NaN	10.8	130.667	1011054	1011055	1011051	8	28.2667	21.3333	1011048
11	29.8667	NaN	NaN	32.5333	NaN	NaN	107.867	1011078	1011079	1011036	7	23.8667	22.4	1011032
11	NaN	NaN	3.73333	NaN	NaN	3.73333	137.733	1011081	1011082	1011078	8	29.8667	23.8667	1011036
11	NaN	NaN	1.06667	NaN	NaN	1.06667	140.4	1011084	1011085	1011079	8	32.5333	23.8667	1011036
11	NaN	NaN	14.8	NaN	NaN	12.2667	84.5333	1011058	1011059	1011042	6	20.4	19.8667	1011019
11	17.4667	NaN	NaN	17.3333	NaN	NaN	101.6	1011063	1011064	1011049	7	20.5333	19.4667	1011033
11	NaN	NaN	22.4	NaN	NaN	22.4	119.067	1011066	1011067	1011063	8	17.4667	20.5333	1011049
11	NaN	NaN	13.7333	NaN	NaN	13.7333	127.733	1011069	1011070	1011052	8	25.3333	21.3333	1011048
11	NaN	NaN	8.8	21.4667	NaN	NaN	87.6	1011044	1011045	1011041	6	23.4667	19.8667	1011019
11	NaN	NaN	32.4	NaN	NaN	32.4	109.067	1011073	1011074	1011045	7	21.4667	23.4667	1011041
11	NaN	NaN	22.5333	NaN	NaN	22.5333	118.933	1011075	1011076	1011064	8	17.3333	20.5333	1011049
12	20.2667	NaN	NaN	18.2667	NaN	NaN	16.4	101202	101203	101201	2	NaN	NaN	1012000
12	19.7333	NaN	NaN	19.7333	NaN	NaN	36.6667	101205	101206	101202	3	20.2667	NaN	101201
12	22.4	NaN	NaN	20.2667	NaN	NaN	56.4	101208	101209	101205	4	19.7333	20.2667	101202
12	18	NaN	NaN	20.5333	NaN	NaN	78.8	1012011	1012012	101208	5	22.4	19.7333	101205
12	20	NaN	NaN	24.2667	NaN	NaN	96.8	1012014	1012015	1012011	6	18	22.4	101208
12	NaN	NaN	24.6667	NaN	NaN	24.6667	116.8	1012017	1012018	1012014	7	20	18	1012011
12	16.5333	NaN	NaN	17.7333	NaN	NaN	34.6667	1012020	1012021	101203	3	18.2667	NaN	101201
12	20	NaN	NaN	20.6667	NaN	NaN	51.2	1012023	1012024	1012020	4	16.5333	18.2667	101203
12	19.6	NaN	NaN	24.6667	NaN	NaN	71.2	1012026	1012027	1012023	5	20	16.5333	1012020
12	31.8667	NaN	NaN	33.0667	NaN	NaN	90.8	1012029	1012030	1012026	6	19.6	20	1012023
12	NaN	NaN	18.8	NaN	NaN	18.8	122.667	1012032	1012033	1012029	7	31.8667	19.6	1012026
12	29.4667	NaN	NaN	21.3333	NaN	NaN	56.4	1012035	1012036	101206	4	19.7333	20.2667	101202
12	18.4	NaN	NaN	17.6	NaN	NaN	85.8667	1012038	1012039	1012035	5	29.4667	19.7333	101206
12	32.9333	NaN	NaN	35.0667	NaN	NaN	104.267	1012040	1012041	1012038	6	18.4	29.4667	1012035
12	NaN	NaN	4.26667	NaN	NaN	4.26667	137.2	1012043	1012044	1012040	7	32.9333	18.4	1012038
12	24	NaN	NaN	19.0667	NaN	NaN	103.467	1012045	1012046	1012039	6	17.6	29.4667	1012035
12	NaN	NaN	14	NaN	NaN	14	127.467	1012050	1012051	1012045	7	24	17.6	1012039
12	NaN	NaN	2.13333	NaN	NaN	2.13333	139.333	1012053	1012054	1012041	7	35.0667	18.4	1012038
12	NaN	NaN	18.9333	NaN	NaN	18.9333	122.533	1012055	1012056	1012046	7	19.0667	17.6	1012039
12	22.6667	NaN	NaN	22.8	NaN	NaN	77.7333	1012058	1012059	1012036	5	21.3333	19.7333	101206
12	25.2	NaN	NaN	39.8667	NaN	NaN	100.4	1012061	1012062	1012058	6	22.6667	21.3333	1012036
12	NaN	NaN	15.8667	NaN	NaN	15.8667	125.6	1012064	1012065	1012061	7	25.2	22.6667	1012058
12	25.7333	NaN	NaN	23.3333	NaN	NaN	76.6667	1012067	1012068	101209	5	20.2667	19.7333	101205
12	18.8	NaN	NaN	19.0667	NaN	NaN	102.4	1012070	1012071	1012067	6	25.7333	20.2667	101209
12	NaN	NaN	20.2667	NaN	NaN	20.2667	121.2	1012073	1012074	1012070	7	18.8	25.7333	1012067
12	26.4	NaN	NaN	18.1333	NaN	NaN	99.3333	1012076	1012077	1012012	6	20.5333	22.4	101208
12	NaN	NaN	15.7333	NaN	NaN	15.7333	125.733	1012079	1012080	1012076	7	26.4	20.5333	1012012
12	NaN	NaN	20.4	NaN	NaN	20.4	121.067	1012082	1012083	1012015	7	24.2667	18	1012011
12	20.5333	NaN	NaN	16.9333	NaN	NaN	52.4	1012085	1012086	1012021	4	17.7333	18.2667	101203
12	20.5333	NaN	NaN	18.5333	NaN	NaN	72.9333	1012088	1012089	1012085	5	20.5333	17.7333	1012021
12	23.3333	NaN	NaN	20.2667	NaN	NaN	93.4667	1012091	1012092	1012088	6	20.5333	20.5333	1012085
12	NaN	NaN	24.6667	NaN	NaN	24.6667	116.8	1012094	1012095	1012091	7	23.3333	20.5333	1012088
12	25.2	NaN	NaN	39.0667	NaN	NaN	71.8667	1012097	1012098	1012024	5	20.6667	16.5333	1012020
12	23.3333	NaN	NaN	22.1333	NaN	NaN	97.0667	10120100	10120101	1012097	6	25.2	20.6667	1012024
12	NaN	NaN	21.0667	NaN	NaN	21.0667	120.4	10120103	10120104	10120100	7	23.3333	25.2	1012097
12	20.2667	NaN	NaN	NaN	NaN	8.26667	95.8667	10120106	10120107	1012027	6	24.6667	20	1012023
12	NaN	NaN	25.3333	NaN	NaN	25.3333	116.133	10120109	10120110	10120106	7	20.2667	24.6667	1012027
12	NaN	NaN	17.6	NaN	NaN	17.6	123.867	10120112	10120113	1012030	7	33.0667	19.6	1012026
12	23.8667	NaN	NaN	NaN	NaN	9.06667	100.533	10120115	10120116	1012059	6	22.8	21.3333	1012036
12	NaN	NaN	17.0667	NaN	NaN	17.0667	124.4	10120118	10120119	10120115	7	23.8667	22.8	1012059
12	NaN	NaN	1.2	NaN	NaN	1.2	140.267	10120122	10120123	1012062	7	39.8667	22.6667	1012058
12	15.2	NaN	NaN	17.6	NaN	NaN	100	10120127	10120128	1012068	6	23.3333	20.2667	101209
12	NaN	NaN	26.2667	NaN	NaN	26.2667	115.2	10120130	10120131	10120127	7	15.2	23.3333	1012068
12	NaN	NaN	20	NaN	NaN	20	121.467	10120133	10120134	1012071	7	19.0667	25.7333	1012067
12	NaN	NaN	24	NaN	NaN	24	117.467	10120136	10120137	1012077	7	18.1333	20.5333	1012012
12	26.2667	NaN	NaN	25.6	NaN	NaN	69.3333	10120139	10120140	1012086	5	16.9333	17.7333	1012021
12	NaN	NaN	45.8667	NaN	NaN	-32.4	95.6	10120142	10120143	10120139	6	26.2667	16.9333	1012086
12	NaN	NaN	7.2	NaN	NaN	11.2	91.4667	10120146	10120147	1012089	6	18.5333	20.5333	1012085
12	NaN	NaN	27.7333	NaN	NaN	27.7333	113.733	10120151	10120152	1012092	7	20.2667	20.5333	1012088
12	NaN	NaN	23.2	NaN	NaN	11.3333	110.933	10120154	10120155	1012098	6	39.0667	20.6667	1012024
12	NaN	NaN	22.2667	NaN	NaN	22.2667	119.2	10120158	10120159	10120101	7	22.1333	25.2	1012097
12	NaN	NaN	23.8667	NaN	NaN	23.8667	117.6	10120163	10120164	10120128	7	17.6	23.3333	1012068
12	18.5333	NaN	NaN	16.9333	NaN	NaN	94.9333	10120167	10120166	10120140	6	25.6	16.9333	1012086
12	NaN	NaN	28	NaN	NaN	28	113.467	10120169	10120170	10120167	7	18.5333	25.6	10120140
12	NaN	NaN	29.6	NaN	NaN	29.6	111.867	10120174	10120175	10120166	7	16.9333	25.6	10120140
13	15.3333	NaN	NaN	20.9333	NaN	NaN	15.2	101302	101303	101301	2	NaN	NaN	1013000
13	14.6667	NaN	NaN	16.9333	NaN	NaN	30.5333	101305	101306	101302	3	15.3333	NaN	101301
13	20.4	NaN	NaN	13.7333	NaN	NaN	45.2	101308	101309	101305	4	14.6667	15.3333	101302
13	30.8	NaN	NaN	39.6	NaN	NaN	65.6	1013011	1013012	101308	5	20.4	14.6667	101305
13	29.7333	NaN	NaN	22.5333	NaN	NaN	96.4	1013014	1013015	1013011	6	30.8	20.4	101308
13	NaN	NaN	15.3333	NaN	NaN	15.3333	126.133	1013017	1013018	1013014	7	29.7333	30.8	1013011
13	22.9333	NaN	NaN	18.6667	NaN	NaN	36.1333	1013020	1013021	101303	3	20.9333	NaN	101301
13	23.4667	NaN	NaN	22.9333	NaN	NaN	59.0667	1013023	1013024	1013020	4	22.9333	20.9333	101303
13	28.1333	NaN	NaN	31.8667	NaN	NaN	82.5333	1013026	1013027	1013023	5	23.4667	22.9333	1013020
13	19.3333	NaN	NaN	22.5333	NaN	NaN	110.667	1013030	1013029	1013026	6	28.1333	23.4667	1013023
13	NaN	NaN	11.4667	NaN	NaN	11.4667	130	1013032	1013033	1013030	7	19.3333	28.1333	1013026
13	16	NaN	NaN	16.6667	NaN	NaN	47.4667	1013035	1013036	101306	4	16.9333	15.3333	101302
13	24.4	NaN	NaN	26.9333	NaN	NaN	63.4667	1013038	1013039	1013035	5	16	16.9333	101306
13	21.6	NaN	NaN	16.2667	NaN	NaN	58.9333	1013044	1013045	101309	5	13.7333	14.6667	101305
13	30.9333	NaN	NaN	25.7333	NaN	NaN	80.5333	1013047	1013048	1013044	6	21.6	13.7333	101309
13	28.8	NaN	NaN	NaN	NaN	30	111.467	1013050	1013051	1013047	7	30.9333	21.6	1013044
13	NaN	NaN	1.2	NaN	NaN	1.2	140.267	1013053	1013054	1013050	8	28.8	30.9333	1013047
13	NaN	NaN	36.2667	25.7333	NaN	NaN	105.2	1013056	1013057	1013012	6	39.6	20.4	101308
13	NaN	NaN	22.5333	NaN	NaN	22.5333	118.933	1013059	1013060	1013015	7	22.5333	30.8	1013011
13	20.2667	NaN	NaN	23.2	NaN	NaN	54.8	1013062	1013063	1013021	4	18.6667	20.9333	101303
13	31.7333	NaN	NaN	NaN	NaN	63.0667	75.0667	1013065	1013066	1013062	5	20.2667	18.6667	1013021
13	NaN	NaN	14.4	NaN	NaN	34.6667	106.8	10130186	10130187	1013065	6	31.7333	20.2667	1013062
13	22.8	NaN	NaN	21.3333	NaN	NaN	82	1013071	1013072	1013024	5	22.9333	22.9333	1013020
13	16.1333	NaN	NaN	19.7333	NaN	NaN	104.8	1013074	1013075	1013071	6	22.8	22.9333	1013024
13	NaN	NaN	20.5333	NaN	NaN	20.5333	120.933	1013077	1013078	1013074	7	16.1333	22.8	1013071
13	NaN	NaN	27.0667	NaN	NaN	27.0667	114.4	1013080	1013081	1013027	6	31.8667	23.4667	1013023
13	NaN	NaN	8.26667	NaN	NaN	8.26667	133.2	1013083	1013084	1013029	7	22.5333	28.1333	1013026
13	23.7333	NaN	NaN	22.8	NaN	NaN	64.1333	1013086	1013087	1013036	5	16.6667	16.9333	101306
13	NaN	NaN	2.66667	NaN	NaN	6.53333	87.8667	1013089	1013090	1013086	6	23.7333	16.6667	1013036
13	26.1333	NaN	NaN	27.4667	NaN	NaN	90.4	1013094	1013095	1013039	6	26.9333	16	1013035
13	NaN	NaN	24.9333	NaN	NaN	24.9333	116.533	1013097	1013098	1013094	7	26.1333	26.9333	1013039
13	NaN	NaN	10.5333	NaN	NaN	10.5333	130.933	10130100	10130101	1013057	7	25.7333	39.6	1013012
13	24.6667	NaN	NaN	24.5333	NaN	NaN	86.9333	10130103	10130104	1013087	6	22.8	16.6667	1013036
13	NaN	NaN	25.4667	27.2	NaN	NaN	111.6	10130106	10130107	10130103	7	24.6667	22.8	1013087
13	23.7333	NaN	NaN	20.2667	NaN	NaN	78	10130110	10130111	1013063	5	23.2	18.6667	1013021
13	NaN	NaN	39.7333	NaN	NaN	32	101.733	10130113	10130114	10130110	6	23.7333	23.2	1013063
13	NaN	NaN	2.93333	NaN	NaN	18	103.333	10130118	10130119	1013072	6	21.3333	22.9333	1013024
13	NaN	NaN	16.9333	NaN	NaN	16.9333	124.533	10130124	10130125	1013075	7	19.7333	22.8	1013071
13	19.6	NaN	NaN	18.9333	NaN	NaN	75.2	10130127	10130128	1013045	6	16.2667	13.7333	101309
13	NaN	NaN	15.0667	28.8	NaN	NaN	94.8	10130130	10130131	10130127	7	19.6	16.2667	1013045
13	NaN	NaN	23.6	NaN	NaN	23.6	117.867	10130134	10130135	1013095	7	27.4667	26.9333	1013039
13	30.9333	NaN	NaN	30.5333	NaN	NaN	106.267	10130137	10130138	1013048	7	25.7333	21.6	1013044
13	NaN	NaN	4.26667	NaN	NaN	4.26667	137.2	10130140	10130141	10130137	8	30.9333	25.7333	1013048
13	NaN	NaN	4.66667	NaN	NaN	4.66667	136.8	10130143	10130144	10130138	8	30.5333	25.7333	1013048
13	24.6667	NaN	NaN	24.8	NaN	NaN	87.8667	1013041	1013042	1013038	6	24.4	16	1013035
13	28	NaN	NaN	NaN	NaN	28.9333	112.533	10130147	10130148	1013041	7	24.6667	24.4	1013038
13	NaN	NaN	0.933333	NaN	NaN	0.933333	140.533	10130150	10130151	10130147	8	28	24.6667	1013041
13	20.4	NaN	NaN	NaN	NaN	28.8	112.667	10130154	10130155	1013042	7	24.8	24.4	1013038
13	NaN	NaN	8.4	NaN	NaN	8.4	133.067	10130157	10130158	10130154	8	20.4	24.8	1013042
13	NaN	NaN	18.6667	NaN	NaN	8	111.467	10130160	10130161	10130104	7	24.5333	22.8	1013087
13	NaN	NaN	2.66667	NaN	NaN	2.66667	138.8	10130162	10130163	10130107	8	27.2	24.6667	10130103
13	18.9333	NaN	NaN	NaN	NaN	43.2	98.2667	10130166	10130167	10130111	6	20.2667	23.2	1013063
13	NaN	NaN	24.2667	NaN	NaN	24.2667	117.2	10130169	10130170	10130166	7	18.9333	20.2667	10130111
13	NaN	NaN	18.2667	20	NaN	NaN	94.1333	10130174	10130175	10130128	7	18.9333	16.2667	1013045
13	NaN	NaN	27.3333	NaN	NaN	27.3333	114.133	10130179	10130180	10130175	8	20	18.9333	10130128
13	NaN	NaN	17.8667	NaN	NaN	17.8667	123.6	10130182	10130183	10130131	8	28.8	19.6	10130127
14	NaN	NaN	20.9333	NaN	NaN	45.2	22.4	101402	101403	101401	2	NaN	NaN	1014000
15	21.2	NaN	NaN	18.5333	NaN	NaN	0.8	101502	101503	101501	2	NaN	NaN	1015000
15	NaN	NaN	0.266667	NaN	NaN	0.266667	22	101505	101506	101502	3	21.2	NaN	101501
15	18	NaN	NaN	18	NaN	NaN	19.3333	101509	1015010	101503	3	18.5333	NaN	101501
15	17.3333	NaN	NaN	18.8	NaN	NaN	37.3333	1015012	1015013	101509	4	18	18.5333	101503
15	22.2667	NaN	NaN	23.7333	NaN	NaN	54.6667	1015015	1015016	1015012	5	17.3333	18	101509
15	23.2	NaN	NaN	24.2667	NaN	NaN	76.9333	1015018	1015019	1015015	6	22.2667	17.3333	1015012
15	29.3333	NaN	NaN	25.6	NaN	NaN	100.133	1015021	1015022	1015018	7	23.2	22.2667	1015015
15	NaN	NaN	12	NaN	NaN	12	129.467	1015024	1015025	1015021	8	29.3333	23.2	1015018
15	22.5333	NaN	NaN	20.1333	NaN	NaN	37.3333	1015027	1015028	1015010	4	18	18.5333	101503
15	27.2	NaN	NaN	20.8	NaN	NaN	59.8667	1015029	1015030	1015027	5	22.5333	18	1015010
15	18.5333	NaN	NaN	17.0667	NaN	NaN	87.0667	1015032	1015033	1015029	6	27.2	22.5333	1015027
15	NaN	NaN	3.33333	NaN	NaN	3.73333	105.6	1015035	1015036	1015032	7	18.5333	27.2	1015029
15	24	NaN	NaN	22.1333	NaN	NaN	57.4667	1015040	1015041	1015028	5	20.1333	18	1015010
15	19.3333	NaN	NaN	23.0667	NaN	NaN	81.4667	1015043	1015044	1015040	6	24	20.1333	1015028
15	16.8	NaN	NaN	NaN	NaN	15.0667	100.8	1015046	1015047	1015043	7	19.3333	24	1015040
15	NaN	NaN	23.8667	NaN	NaN	23.8667	117.6	1015049	1015050	1015046	8	16.8	19.3333	1015043
15	23.8667	NaN	NaN	22.9333	NaN	NaN	56.1333	1015052	1015053	1015013	5	18.8	18	101509
15	27.6	NaN	NaN	NaN	NaN	8.26667	80	1015054	1015055	1015052	6	23.8667	18.8	1015013
15	NaN	NaN	4.4	29.4667	NaN	NaN	107.6	1015057	1015058	1015054	7	27.6	23.8667	1015052
15	NaN	NaN	4.4	NaN	NaN	4.4	137.067	1015061	1015062	1015058	8	29.4667	27.6	1015054
15	22.9333	NaN	NaN	30.4	NaN	NaN	78.4	1015064	1015065	1015016	6	23.7333	17.3333	1015012
15	23.0667	NaN	NaN	19.6	NaN	NaN	101.333	1015067	1015068	1015064	7	22.9333	23.7333	1015016
15	NaN	NaN	17.0667	NaN	NaN	17.0667	124.4	1015070	1015071	1015067	8	23.0667	22.9333	1015064
15	19.4667	NaN	NaN	20.4	NaN	NaN	101.2	1015073	1015074	1015019	7	24.2667	22.2667	1015015
15	NaN	NaN	20.8	NaN	NaN	20.8	120.667	1015076	1015077	1015073	8	19.4667	24.2667	1015019
15	NaN	NaN	15.7333	NaN	NaN	15.7333	125.733	1015079	1015080	1015022	8	25.6	23.2	1015018
15	18.2667	NaN	NaN	19.8667	NaN	NaN	80.6667	1015082	1015083	1015030	6	20.8	22.5333	1015027
15	22.1333	NaN	NaN	17.2	NaN	NaN	98.9333	1015085	1015086	1015082	7	18.2667	20.8	1015030
15	NaN	NaN	20.4	NaN	NaN	20.4	121.067	1015088	1015089	1015085	8	22.1333	18.2667	1015082
15	NaN	NaN	8.93333	18.4	NaN	NaN	104.133	1015091	1015092	1015033	7	17.0667	27.2	1015029
15	NaN	NaN	18.9333	NaN	NaN	18.9333	122.533	1015095	1015096	1015092	8	18.4	17.0667	1015033
15	NaN	NaN	1.6	NaN	NaN	1.6	79.6	1015098	1015099	1015041	6	22.1333	20.1333	1015028
15	24.5333	NaN	NaN	28.1333	NaN	NaN	104.533	10150101	10150102	1015044	7	23.0667	24	1015040
15	NaN	NaN	12.4	NaN	NaN	12.4	129.067	10150104	10150105	10150101	8	24.5333	23.0667	1015044
15	NaN	NaN	23.4667	NaN	NaN	9.33333	79.0667	10150108	10150109	1015053	6	22.9333	18.8	1015013
15	22.8	NaN	NaN	NaN	NaN	9.06667	108.8	10150113	10150114	1015065	7	30.4	23.7333	1015016
15	NaN	NaN	9.86667	NaN	NaN	9.86667	131.6	10150116	10150117	10150113	8	22.8	30.4	1015065
15	NaN	NaN	20.5333	NaN	NaN	20.5333	120.933	10150119	10150120	1015068	8	19.6	22.9333	1015064
15	NaN	NaN	19.8667	NaN	NaN	19.8667	121.6	10150122	10150123	1015074	8	20.4	24.2667	1015019
15	NaN	NaN	6.13333	17.7333	NaN	NaN	100.533	10150125	10150126	1015083	7	19.8667	20.8	1015030
15	NaN	NaN	23.2	NaN	NaN	23.2	118.267	10150129	10150130	10150126	8	17.7333	19.8667	1015083
15	NaN	NaN	25.3333	NaN	NaN	25.3333	116.133	10150131	10150132	1015086	8	17.2	18.2667	1015082
15	NaN	NaN	8.8	NaN	NaN	8.8	132.667	10150134	10150135	10150102	8	28.1333	23.0667	1015044
16	23.7333	NaN	NaN	26	NaN	NaN	0	101601	101602	101603	2	NaN	NaN	1016000
16	NaN	NaN	0.533333	NaN	NaN	0.533333	23.7333	101604	101605	101601	3	23.7333	NaN	101603
16	NaN	NaN	78.1333	44	NaN	NaN	26	101606	101607	101602	3	26	NaN	101603
16	21.8667	NaN	NaN	19.3333	NaN	NaN	70	1016010	1016011	101607	4	44	26	101602
16	NaN	NaN	36.4	NaN	NaN	49.6	91.8667	1016012	1016013	1016010	5	21.8667	44	101607
16	NaN	NaN	0.266667	NaN	NaN	0.266667	89.3333	1016015	1016016	1016011	5	19.3333	44	101607
17	20.9333	NaN	NaN	21.7333	NaN	NaN	14.9333	101702	101703	101701	2	NaN	NaN	1017000
17	30.2667	NaN	NaN	30.5333	NaN	NaN	35.8667	101705	101706	101702	3	20.9333	NaN	101701
17	18.4	NaN	NaN	20.4	NaN	NaN	66.1333	101708	101709	101705	4	30.2667	20.9333	101702
17	19.4667	NaN	NaN	23.2	NaN	NaN	84.5333	1017011	1017012	101708	5	18.4	30.2667	101705
17	22.5333	NaN	NaN	23.4667	NaN	NaN	104	1017014	1017015	1017011	6	19.4667	18.4	101708
17	NaN	NaN	14.9333	NaN	NaN	14.9333	126.533	1017017	1017018	1017014	7	22.5333	19.4667	1017011
17	20.9333	NaN	NaN	20.9333	NaN	NaN	36.6667	1017020	1017021	101703	3	21.7333	NaN	101701
17	NaN	NaN	14.6667	26.8	NaN	NaN	57.6	1017023	1017024	1017020	4	20.9333	21.7333	101703
17	NaN	NaN	9.2	27.6	NaN	NaN	84.4	1017027	1017028	1017024	5	26.8	20.9333	1017020
17	20.4	NaN	NaN	23.0667	NaN	NaN	112	1017031	1017032	1017028	6	27.6	26.8	1017024
17	NaN	NaN	9.06667	NaN	NaN	9.06667	132.4	1017033	1017034	1017031	7	20.4	27.6	1017028
17	22.9333	NaN	NaN	NaN	NaN	75.0667	66.4	1017039	1017040	101706	4	30.5333	20.9333	101702
17	NaN	NaN	5.6	NaN	NaN	4.8	89.3333	1017042	1017043	1017039	5	22.9333	30.5333	101706
17	24.2667	NaN	NaN	21.0667	NaN	NaN	86.5333	1017046	1017047	101709	5	20.4	30.2667	101705
17	21.6	NaN	NaN	19.6	NaN	NaN	110.8	1017049	1017050	1017046	6	24.2667	20.4	101709
17	NaN	NaN	9.06667	NaN	NaN	9.06667	132.4	1017052	1017053	1017049	7	21.6	24.2667	1017046
17	29.8667	NaN	NaN	25.6	NaN	NaN	107.733	1017055	1017056	1017012	6	23.2	18.4	101708
17	NaN	NaN	3.86667	NaN	NaN	3.86667	137.6	1017058	1017059	1017055	7	29.8667	23.2	1017012
17	NaN	NaN	14	NaN	NaN	14	127.467	1017061	1017062	1017015	7	23.4667	19.4667	1017011
17	NaN	NaN	6.4	NaN	NaN	6.4	135.067	1017064	1017065	1017032	7	23.0667	27.6	1017028
17	NaN	NaN	9.6	21.0667	NaN	NaN	57.6	1017036	1017037	1017021	4	20.9333	21.7333	101703
17	20.9333	NaN	NaN	21.2	NaN	NaN	78.6667	1017068	1017069	1017037	5	21.0667	20.9333	1017021
17	19.8667	NaN	NaN	19.3333	NaN	NaN	99.6	1017071	1017072	1017068	6	20.9333	21.0667	1017037
17	NaN	NaN	22	NaN	NaN	22	119.467	1017074	1017075	1017071	7	19.8667	20.9333	1017068
17	NaN	NaN	10.5333	21.7333	NaN	NaN	107.6	1017077	1017078	1017047	6	21.0667	20.4	101709
17	NaN	NaN	8.13333	NaN	NaN	8.13333	133.333	1017081	1017082	1017056	7	25.6	23.2	1017012
17	NaN	NaN	12.1333	NaN	NaN	12.1333	129.333	1017084	1017085	1017078	7	21.7333	21.0667	1017047
17	24.9333	NaN	NaN	NaN	NaN	41.6	99.8667	1017087	1017088	1017069	6	21.2	21.0667	1017037
17	NaN	NaN	16.6667	NaN	NaN	16.6667	124.8	1017090	1017091	1017087	7	24.9333	21.2	1017069
17	NaN	NaN	22.5333	NaN	NaN	22.5333	118.933	1017094	1017095	1017072	7	19.3333	20.9333	1017068
17	NaN	NaN	11.0667	NaN	NaN	11.0667	130.4	1017097	1017098	1017050	7	19.6	24.2667	1017046
18	20.6667	NaN	NaN	30.9333	NaN	NaN	21.2	101802	101803	101801	2	NaN	NaN	1018000
18	29.4667	NaN	NaN	28	NaN	NaN	41.8667	101805	101806	101802	3	20.6667	NaN	101801
18	NaN	NaN	70.1333	NaN	NaN	70.1333	71.3333	101808	101809	101805	4	29.4667	20.6667	101802
18	26.1333	NaN	NaN	30.4	NaN	NaN	52.1333	1018012	1018013	101803	3	30.9333	NaN	101801
18	23.0667	NaN	NaN	NaN	NaN	63.2	78.2667	1018015	1018016	1018012	4	26.1333	30.9333	101803
18	NaN	NaN	0.266667	NaN	NaN	0.266667	101.333	1018018	1018019	1018015	5	23.0667	26.1333	1018012
18	NaN	NaN	51.0667	42.8	NaN	NaN	69.8667	1018021	1018022	101806	4	28	20.6667	101802
18	NaN	NaN	54.5333	50.8	NaN	NaN	82.5333	1018028	1018029	1018013	4	30.4	30.9333	101803
18	NaN	NaN	28.8	NaN	NaN	28.8	112.667	1018032	1018033	1018022	5	42.8	28	101806
18	NaN	NaN	8.13333	NaN	NaN	8.13333	133.333	1018039	1018040	1018029	5	50.8	30.4	1018013
19	28.4	NaN	NaN	26.6667	NaN	NaN	27.6	101902	101903	101901	2	NaN	NaN	1019000
19	24.5333	NaN	NaN	28.5333	NaN	NaN	56	101904	101905	101902	3	28.4	NaN	101901
19	19.0667	NaN	NaN	22.2667	NaN	NaN	80.5333	101907	101908	101904	4	24.5333	28.4	101902
19	23.8667	NaN	NaN	19.8667	NaN	NaN	99.6	1019010	1019011	101907	5	19.0667	24.5333	101904
19	NaN	NaN	18	NaN	NaN	18	123.467	1019013	1019014	1019010	6	23.8667	19.0667	101907
19	24.9333	NaN	NaN	22.6667	NaN	NaN	54.2667	1019015	1019016	101903	3	26.6667	NaN	101901
19	25.8667	NaN	NaN	30.6667	NaN	NaN	79.2	1019018	1019019	1019015	4	24.9333	26.6667	101903
19	33.8667	NaN	NaN	NaN	NaN	23.6	105.067	1019021	1019022	1019018	5	25.8667	24.9333	1019015
19	NaN	NaN	2.53333	NaN	NaN	2.53333	138.933	1019024	1019025	1019021	6	33.8667	25.8667	1019018
19	NaN	NaN	1.6	NaN	NaN	1.6	84.5333	1019027	1019028	101905	4	28.5333	28.4	101902
19	21.7333	NaN	NaN	27.6	NaN	NaN	102.8	1019030	1019031	101908	5	22.2667	24.5333	101904
19	NaN	NaN	16.9333	NaN	NaN	16.9333	124.533	1019033	1019034	1019030	6	21.7333	22.2667	101908
19	NaN	NaN	22	NaN	NaN	22	119.467	1019037	1019038	1019011	6	19.8667	19.0667	101907
19	26.8	NaN	NaN	NaN	NaN	38.1333	76.9333	1019040	1019041	1019016	4	22.6667	26.6667	101903
19	21.0667	NaN	NaN	23.6	NaN	NaN	103.733	1019043	1019044	1019040	5	26.8	22.6667	1019016
19	NaN	NaN	16.6667	NaN	NaN	16.6667	124.8	1019046	1019047	1019043	6	21.0667	26.8	1019040
19	NaN	NaN	1.86667	28.4	NaN	NaN	109.867	1019049	1019050	1019019	5	30.6667	24.9333	1019015
19	NaN	NaN	3.2	NaN	NaN	3.2	138.267	1019053	1019054	1019050	6	28.4	30.6667	1019019
19	NaN	NaN	11.0667	NaN	NaN	11.0667	130.4	1019058	1019059	1019031	6	27.6	22.2667	101908
19	NaN	NaN	14.1333	NaN	NaN	14.1333	127.333	1019061	1019062	1019044	6	23.6	26.8	1019040
20	20.2667	NaN	NaN	20.9333	NaN	NaN	15.3333	102002	102003	102001	2	NaN	NaN	1020000
20	21.8667	NaN	NaN	21.7333	NaN	NaN	35.6	102005	102006	102002	3	20.2667	NaN	102001
20	29.2	NaN	NaN	33.7333	NaN	NaN	57.4667	102008	102009	102005	4	21.8667	20.2667	102002
20	19.7333	NaN	NaN	18.9333	NaN	NaN	86.6667	1020011	1020012	102008	5	29.2	21.8667	102005
20	NaN	NaN	35.0667	NaN	NaN	35.0667	106.4	1020014	1020015	1020011	6	19.7333	29.2	102008
20	NaN	NaN	20.9333	24.2667	NaN	NaN	36.2667	1020018	1020019	102003	3	20.9333	NaN	102001
20	NaN	NaN	16.4	19.3333	NaN	NaN	60.5333	1020022	1020023	1020019	4	24.2667	20.9333	102003
20	17.7333	NaN	NaN	22.1333	NaN	NaN	79.8667	1020026	1020027	1020023	5	19.3333	24.2667	1020019
20	24.5333	NaN	NaN	18.6667	NaN	NaN	102	1020032	1020033	1020027	6	22.1333	19.3333	1020023
20	NaN	NaN	14.9333	NaN	NaN	14.9333	126.533	1020036	1020037	1020032	7	24.5333	22.1333	1020027
20	34.4	NaN	NaN	35.2	NaN	NaN	57.3333	1020039	1020040	102006	4	21.7333	20.2667	102002
20	24.6667	NaN	NaN	24	NaN	NaN	91.7333	1020042	1020043	1020039	5	34.4	21.7333	102006
20	NaN	NaN	25.0667	NaN	NaN	25.0667	116.4	1020045	1020046	1020042	6	24.6667	34.4	1020039
20	28.6667	NaN	NaN	NaN	NaN	9.2	91.2	1020048	1020049	102009	5	33.7333	21.8667	102005
20	NaN	NaN	21.6	NaN	NaN	21.6	119.867	1020051	1020052	1020048	6	28.6667	33.7333	102009
20	NaN	NaN	35.8667	NaN	NaN	35.8667	105.6	1020054	1020055	1020012	6	18.9333	29.2	102008
20	18.8	NaN	NaN	17.6	NaN	NaN	97.6	1020029	1020030	1020026	6	17.7333	19.3333	1020023
20	NaN	NaN	25.0667	NaN	NaN	25.0667	116.4	1020059	1020060	1020029	7	18.8	17.7333	1020026
20	NaN	NaN	26.2667	NaN	NaN	26.2667	115.2	1020062	1020063	1020030	7	17.6	17.7333	1020026
20	NaN	NaN	20.8	NaN	NaN	20.8	120.667	1020065	1020066	1020033	7	18.6667	22.1333	1020027
20	23.6	NaN	NaN	24.9333	NaN	NaN	92.5333	1020068	1020069	1020040	5	35.2	21.7333	102006
20	NaN	NaN	25.3333	NaN	NaN	25.3333	116.133	1020071	1020072	1020068	6	23.6	35.2	1020040
20	NaN	NaN	25.7333	NaN	NaN	25.7333	115.733	1020074	1020075	1020043	6	24	34.4	1020039
20	NaN	NaN	24	NaN	NaN	24	117.467	1020079	1020080	1020069	6	24.9333	35.2	1020040
21	29.0667	NaN	NaN	25.0667	NaN	NaN	10.4	102102	102103	102101	2	NaN	NaN	1021000
21	NaN	NaN	10.5333	NaN	NaN	18.5333	39.4667	102105	102106	102102	3	29.0667	NaN	102101
21	NaN	NaN	18	20.2667	NaN	NaN	35.4667	1021010	1021011	102103	3	25.0667	NaN	102101
21	24.1333	NaN	NaN	24	NaN	NaN	55.7333	1021015	1021016	1021011	4	20.2667	25.0667	102103
21	20.8	NaN	NaN	20.6667	NaN	NaN	79.8667	1021018	1021019	1021015	5	24.1333	20.2667	1021011
21	NaN	NaN	3.73333	NaN	NaN	2.66667	100.667	1021021	1021022	1021018	6	20.8	24.1333	1021015
21	20.9333	NaN	NaN	NaN	NaN	37.6	100.533	1021026	1021027	1021019	6	20.6667	24.1333	1021015
21	NaN	NaN	20	NaN	NaN	20	121.467	1021029	1021030	1021026	7	20.9333	20.6667	1021019
21	20.4	NaN	NaN	20.1333	NaN	NaN	79.7333	1021033	1021034	1021016	5	24	20.2667	1021011
21	22.9333	NaN	NaN	27.7333	NaN	NaN	100.133	1021036	1021037	1021033	6	20.4	24	1021016
21	NaN	NaN	18.4	NaN	NaN	18.4	123.067	1021039	1021040	1021036	7	22.9333	20.4	1021033
21	NaN	NaN	13.6	NaN	NaN	13.6	127.867	1021045	1021046	1021037	7	27.7333	20.4	1021033
21	NaN	NaN	41.6	38.5333	NaN	NaN	99.8667	1021042	1021043	1021034	6	20.1333	24	1021016
21	NaN	NaN	3.06667	NaN	NaN	3.06667	138.4	1021049	1021050	1021043	7	38.5333	20.1333	1021034
22	28.2667	NaN	NaN	27.7333	NaN	NaN	18.5333	102202	102203	102201	2	NaN	NaN	1022000
22	20.4	NaN	NaN	16.9333	NaN	NaN	46.8	102205	102206	102202	3	28.2667	NaN	102201
22	39.2	NaN	NaN	33.6	NaN	NaN	67.2	102208	102209	102205	4	20.4	28.2667	102202
22	25.6	NaN	NaN	22.6667	NaN	NaN	106.4	1022011	1022012	102208	5	39.2	20.4	102205
22	NaN	NaN	9.46667	NaN	NaN	9.46667	132	1022014	1022015	1022011	6	25.6	39.2	102208
22	25.8667	NaN	NaN	22.6667	NaN	NaN	46.2667	1022017	1022018	102203	3	27.7333	NaN	102201
22	15.8667	NaN	NaN	19.7333	NaN	NaN	72.1333	1022020	1022021	1022017	4	25.8667	27.7333	102203
22	18.2667	NaN	NaN	18.2667	NaN	NaN	88	1022023	1022024	1022020	5	15.8667	25.8667	1022017
22	33.6	NaN	NaN	NaN	NaN	12.1333	106.267	1022026	1022027	1022023	6	18.2667	15.8667	1022020
22	NaN	NaN	1.6	NaN	NaN	1.6	139.867	1022029	1022030	1022026	7	33.6	18.2667	1022023
22	17.6	NaN	NaN	19.7333	NaN	NaN	63.7333	1022032	1022033	102206	4	16.9333	28.2667	102202
22	19.0667	NaN	NaN	18	NaN	NaN	81.3333	1022035	1022036	1022032	5	17.6	16.9333	102206
22	20.9333	NaN	NaN	22.8	NaN	NaN	100.4	1022038	1022039	1022035	6	19.0667	17.6	1022032
22	NaN	NaN	20.1333	NaN	NaN	20.1333	121.333	1022041	1022042	1022038	7	20.9333	19.0667	1022035
22	NaN	NaN	12.4	NaN	NaN	12.4	129.067	1022047	1022048	1022012	6	22.6667	39.2	102208
22	25.7333	NaN	NaN	26.4	NaN	NaN	68.9333	1022051	1022050	1022018	4	22.6667	27.7333	102203
22	NaN	NaN	5.86667	NaN	NaN	15.0667	94.6667	1022053	1022054	1022051	5	25.7333	22.6667	1022018
22	NaN	NaN	3.2	21.3333	NaN	NaN	91.8667	1022057	1022058	1022021	5	19.7333	25.8667	1022017
22	NaN	NaN	28.2667	NaN	NaN	28.2667	113.2	1022061	1022062	1022058	6	21.3333	19.7333	1022021
22	NaN	NaN	0.266667	27.0667	NaN	NaN	100.8	1022044	1022045	102209	5	33.6	20.4	102205
22	NaN	NaN	1.86667	NaN	NaN	7.33333	95.3333	1022064	1022065	1022050	5	26.4	22.6667	1022018
22	19.0667	NaN	NaN	18	NaN	NaN	106.267	1022069	1022070	1022024	6	18.2667	15.8667	1022020
22	NaN	NaN	16.1333	NaN	NaN	16.1333	125.333	1022072	1022073	1022069	7	19.0667	18.2667	1022024
22	NaN	NaN	17.2	NaN	NaN	17.2	124.267	1022075	1022076	1022070	7	18	18.2667	1022024
22	33.2	NaN	NaN	19.4667	NaN	NaN	83.4667	1022079	1022080	1022033	5	19.7333	16.9333	102206
22	NaN	NaN	24.8	NaN	NaN	24.8	116.667	1022082	1022083	1022079	6	33.2	19.7333	1022033
22	NaN	NaN	8.8	16.5333	NaN	NaN	102.933	1022085	1022086	1022080	6	19.4667	19.7333	1022033
22	NaN	NaN	22	NaN	NaN	22	119.467	1022089	1022090	1022086	7	16.5333	19.4667	1022080
22	21.6	NaN	NaN	NaN	NaN	6.26667	99.3333	1022092	1022093	1022036	6	18	17.6	1022032
22	NaN	NaN	20.5333	NaN	NaN	20.5333	120.933	1022095	1022096	1022092	7	21.6	18	1022036
22	NaN	NaN	13.6	NaN	NaN	13.6	127.867	10220100	10220101	1022045	6	27.0667	33.6	102209
22	NaN	NaN	18.2667	NaN	NaN	18.2667	123.2	10220103	10220104	1022039	7	22.8	19.0667	1022035
23	21.0667	NaN	NaN	NaN	NaN	14.9333	8.13333	102302	102303	102301	2	NaN	NaN	1023000
23	19.7333	NaN	NaN	16.5333	NaN	NaN	29.2	102305	102306	102302	3	21.0667	NaN	102301
23	35.4667	NaN	NaN	25.6	NaN	NaN	48.9333	102308	102309	102305	4	19.7333	21.0667	102302
23	29.0667	NaN	NaN	32.6667	NaN	NaN	84.4	1023011	1023012	102308	5	35.4667	19.7333	102305
23	NaN	NaN	28	NaN	NaN	28	113.467	1023014	1023015	1023011	6	29.0667	35.4667	102308
23	18	NaN	NaN	20.1333	NaN	NaN	45.7333	1023018	1023019	102306	4	16.5333	21.0667	102302
23	25.3333	NaN	NaN	19.3333	NaN	NaN	63.7333	1023021	1023022	1023018	5	18	16.5333	102306
23	18.8	NaN	NaN	20.4	NaN	NaN	89.0667	1023024	1023025	1023021	6	25.3333	18	1023018
23	21.6	NaN	NaN	20.5333	NaN	NaN	107.867	1023027	1023028	1023024	7	18.8	25.3333	1023021
23	NaN	NaN	12	NaN	NaN	12	129.467	1023030	1023031	1023027	8	21.6	18.8	1023024
23	26.6667	NaN	NaN	19.3333	NaN	NaN	74.5333	1023033	1023034	102309	5	25.6	19.7333	102305
23	34.4	NaN	NaN	38.2667	NaN	NaN	101.2	1023036	1023037	1023033	6	26.6667	25.6	102309
23	NaN	NaN	5.86667	NaN	NaN	5.86667	135.6	1023039	1023040	1023036	7	34.4	26.6667	1023033
23	NaN	NaN	24.4	NaN	NaN	24.4	117.067	1023042	1023043	1023012	6	32.6667	35.4667	102308
23	19.2	NaN	NaN	16.6667	NaN	NaN	93.8667	1023045	1023046	1023034	6	19.3333	25.6	102309
23	NaN	NaN	28.4	NaN	NaN	28.4	113.067	1023047	1023048	1023045	7	19.2	19.3333	1023034
23	NaN	NaN	30.9333	NaN	NaN	30.9333	110.533	1023050	1023051	1023046	7	16.6667	19.3333	1023034
23	NaN	NaN	2	NaN	NaN	2	139.467	1023055	1023056	1023037	7	38.2667	26.6667	1023033
23	NaN	NaN	13.0667	NaN	NaN	13.0667	128.4	1023057	1023058	1023028	8	20.5333	18.8	1023024
23	24.8	NaN	NaN	17.7333	NaN	NaN	109.467	1023060	1023061	1023025	7	20.4	25.3333	1023021
23	NaN	NaN	7.2	NaN	NaN	7.2	134.267	1023062	1023063	1023060	8	24.8	20.4	1023025
23	NaN	NaN	14.2667	NaN	NaN	14.2667	127.2	1023064	1023065	1023061	8	17.7333	20.4	1023025
23	25.0667	NaN	NaN	23.8667	NaN	NaN	83.0667	1023067	1023068	1023022	6	19.3333	18	1023018
23	21.2	NaN	NaN	20.6667	NaN	NaN	108.133	1023070	1023071	1023067	7	25.0667	19.3333	1023022
23	NaN	NaN	12.1333	NaN	NaN	12.1333	129.333	1023073	1023074	1023070	8	21.2	25.0667	1023067
23	NaN	NaN	12.6667	NaN	NaN	12.6667	128.8	1023076	1023077	1023071	8	20.6667	25.0667	1023067
23	16.9333	NaN	NaN	NaN	NaN	14.9333	106.933	1023079	1023080	1023068	7	23.8667	19.3333	1023022
23	NaN	NaN	17.6	NaN	NaN	17.6	123.867	1023081	1023082	1023079	8	16.9333	23.8667	1023068
23	23.6	NaN	NaN	26.5333	NaN	NaN	65.8667	1023086	1023087	1023019	5	20.1333	16.5333	102306
23	22.5333	NaN	NaN	20.8	NaN	NaN	89.4667	1023089	1023090	1023086	6	23.6	20.1333	1023019
23	26.2667	NaN	NaN	29.3333	NaN	NaN	112	1023092	1023093	1023089	7	22.5333	23.6	1023086
23	NaN	NaN	3.2	NaN	NaN	3.2	138.267	1023095	1023096	1023092	8	26.2667	22.5333	1023089
23	NaN	NaN	0.133333	NaN	NaN	0.133333	141.333	1023097	1023098	1023093	8	29.3333	22.5333	1023089
23	21.8667	NaN	NaN	21.7333	NaN	NaN	110.267	10230100	10230101	1023090	7	20.8	23.6	1023086
23	NaN	NaN	9.33333	NaN	NaN	9.33333	132.133	10230103	10230104	10230100	8	21.8667	20.8	1023090
23	NaN	NaN	9.46667	NaN	NaN	9.46667	132	10230105	10230106	10230101	8	21.7333	20.8	1023090
23	35.2	NaN	NaN	26.1333	NaN	NaN	92.4	10230108	10230109	1023087	6	26.5333	20.1333	1023019
23	NaN	NaN	13.8667	NaN	NaN	13.8667	127.6	10230110	10230111	10230108	7	35.2	26.5333	1023087
23	NaN	NaN	22.9333	NaN	NaN	22.9333	118.533	10230112	10230113	10230109	7	26.1333	26.5333	1023087
24	NaN	NaN	14.5333	16.4	NaN	NaN	14.8	102402	102403	102401	2	NaN	NaN	1024000
24	18.6667	NaN	NaN	21.2	NaN	NaN	31.2	102407	102408	102403	3	16.4	NaN	102401
24	NaN	NaN	10.5333	15.7333	NaN	NaN	49.8667	1024010	1024011	102407	4	18.6667	16.4	102403
24	17.6	NaN	NaN	NaN	NaN	6.4	65.6	1024013	1024014	1024011	5	15.7333	18.6667	102407
24	NaN	NaN	6.26667	26.6667	NaN	NaN	83.2	1024016	1024017	1024013	6	17.6	15.7333	1024011
24	23.6	NaN	NaN	NaN	NaN	11.8667	109.867	1024019	1024020	1024017	7	26.6667	17.6	1024013
24	NaN	NaN	8	NaN	NaN	8	133.467	1024021	1024022	1024019	8	23.6	26.6667	1024017
24	22.2667	NaN	NaN	23.3333	NaN	NaN	52.4	1024024	1024025	102408	4	21.2	16.4	102403
24	NaN	NaN	19.4667	17.3333	NaN	NaN	74.6667	1024027	1024028	1024024	5	22.2667	21.2	102408
24	26	NaN	NaN	22.2667	NaN	NaN	75.7333	1024033	1024034	1024025	5	23.3333	21.2	102408
24	16.5333	NaN	NaN	19.8667	NaN	NaN	92	1024039	1024040	1024028	6	17.3333	22.2667	1024024
24	22.5333	NaN	NaN	NaN	NaN	32.9333	108.533	1024042	1024043	1024039	7	16.5333	17.3333	1024028
24	NaN	NaN	10.4	NaN	NaN	10.4	131.067	1024045	1024046	1024042	8	22.5333	16.5333	1024039
24	35.6	NaN	NaN	NaN	NaN	30.5333	98	1024048	1024049	1024034	6	22.2667	23.3333	1024025
24	NaN	NaN	7.86667	NaN	NaN	7.86667	133.6	1024050	1024051	1024048	7	35.6	22.2667	1024034
24	NaN	NaN	29.6	NaN	NaN	26	111.867	1024054	1024055	1024040	7	19.8667	17.3333	1024028
24	NaN	NaN	14.8	NaN	NaN	8.13333	101.733	1024058	1024059	1024033	6	26	23.3333	1024025
26	21.6	NaN	NaN	21.6	NaN	NaN	15.8667	102602	102603	102601	2	NaN	NaN	1026000
26	21.6	NaN	NaN	27.2	NaN	NaN	37.4667	102605	102606	102602	3	21.6	NaN	102601
26	NaN	NaN	0.4	NaN	NaN	0.4	59.0667	102608	102609	102605	4	21.6	21.6	102602
26	17.7333	NaN	NaN	NaN	NaN	32.1333	64.6667	1026011	1026012	102606	4	27.2	21.6	102602
26	22.9333	NaN	NaN	NaN	NaN	59.0667	82.4	1026014	1026015	1026011	5	17.7333	27.2	102606
26	NaN	NaN	36.1333	NaN	NaN	36.1333	105.333	1026017	1026018	1026014	6	22.9333	17.7333	1026011
26	20.5333	NaN	NaN	18.6667	NaN	NaN	37.4667	1026024	1026025	102603	3	21.6	NaN	102601
26	26.5333	NaN	NaN	23.2	NaN	NaN	58	1026027	1026028	1026024	4	20.5333	21.6	102603
26	22.1333	NaN	NaN	23.8667	NaN	NaN	84.5333	1026030	1026031	1026027	5	26.5333	20.5333	1026024
26	NaN	NaN	15.4667	NaN	NaN	34.8	106.667	1026033	1026034	1026030	6	22.1333	26.5333	1026027
26	22.4	NaN	NaN	20	NaN	NaN	56.1333	1026037	1026038	1026025	4	18.6667	21.6	102603
26	18.6667	NaN	NaN	21.6	NaN	NaN	78.5333	1026040	1026041	1026037	5	22.4	18.6667	1026025
26	18.5333	NaN	NaN	15.4667	NaN	NaN	97.2	1026043	1026044	1026040	6	18.6667	22.4	1026037
26	NaN	NaN	25.7333	NaN	NaN	25.7333	115.733	1026046	1026047	1026043	7	18.5333	18.6667	1026040
26	32.5333	NaN	NaN	NaN	NaN	20.4	81.2	1026049	1026050	1026028	5	23.2	20.5333	1026024
26	NaN	NaN	27.7333	NaN	NaN	27.7333	113.733	1026052	1026053	1026049	6	32.5333	23.2	1026028
26	NaN	NaN	33.0667	NaN	NaN	33.0667	108.4	1026055	1026056	1026031	6	23.8667	26.5333	1026027
26	19.7333	NaN	NaN	18.8	NaN	NaN	76.1333	1026060	1026061	1026038	5	20	18.6667	1026025
26	NaN	NaN	45.6	NaN	NaN	45.6	95.8667	1026063	1026064	1026060	6	19.7333	20	1026038
26	NaN	NaN	28.8	NaN	NaN	28.8	112.667	1026070	1026071	1026044	7	15.4667	18.6667	1026040
26	NaN	NaN	15.8667	NaN	NaN	41.3333	100.133	1026068	1026067	1026041	6	21.6	22.4	1026037
26	17.0667	NaN	NaN	26.5333	NaN	NaN	94.9333	1026079	1026080	1026061	6	18.8	20	1026038
26	NaN	NaN	14	NaN	NaN	15.4667	112	1026082	1026083	1026079	7	17.0667	18.8	1026061
26	NaN	NaN	20	NaN	NaN	20	121.467	1026087	1026088	1026080	7	26.5333	18.8	1026061
27	22.1333	NaN	NaN	19.7333	NaN	NaN	2.8	102702	102703	102701	2	NaN	NaN	1027000
27	22.9333	NaN	NaN	NaN	NaN	19.8667	24.9333	102704	102705	102702	3	22.1333	NaN	102701
27	30.8	NaN	NaN	27.3333	NaN	NaN	47.8667	102707	102708	102704	4	22.9333	22.1333	102702
27	NaN	NaN	11.0667	NaN	NaN	7.86667	78.6667	1027010	1027011	102707	5	30.8	22.9333	102704
27	NaN	NaN	3.86667	NaN	NaN	9.06667	75.2	1027015	1027016	102708	5	27.3333	22.9333	102704
27	NaN	NaN	4	19.6	NaN	NaN	22.5333	1027021	1027022	102703	3	19.7333	NaN	102701
27	NaN	NaN	2.93333	24.8	NaN	NaN	42.1333	1027025	1027026	1027022	4	19.6	19.7333	102703
27	NaN	NaN	0.266667	NaN	NaN	0.266667	66.9333	1027029	1027030	1027026	5	24.8	19.6	1027022
28	16.5333	NaN	NaN	18.6667	NaN	NaN	9.46667	102802	102803	102801	2	NaN	NaN	1028000
28	NaN	NaN	71.7333	NaN	NaN	67.2	28.1333	102806	102807	102803	3	18.6667	NaN	102801
28	24.6667	NaN	NaN	NaN	NaN	74.6667	26	102804	102805	102802	3	16.5333	NaN	102801
28	18.2667	NaN	NaN	20.6667	NaN	NaN	50.6667	1028011	1028012	102804	4	24.6667	16.5333	102802
28	22.4	NaN	NaN	21.8667	NaN	NaN	68.9333	1028014	1028015	1028011	5	18.2667	24.6667	102804
28	NaN	NaN	14.2667	20.1333	NaN	NaN	91.3333	1028017	1028018	1028014	6	22.4	18.2667	1028011
28	NaN	NaN	6.66667	NaN	NaN	26.1333	111.467	1028022	1028023	1028018	7	20.1333	22.4	1028014
28	16.5333	NaN	NaN	20.6667	NaN	NaN	90.8	1028027	1028028	1028015	6	21.8667	18.2667	1028011
28	24.2667	NaN	NaN	20.4	NaN	NaN	107.333	1028030	1028031	1028027	7	16.5333	21.8667	1028015
28	NaN	NaN	9.86667	NaN	NaN	9.86667	131.6	1028033	1028034	1028030	8	24.2667	16.5333	1028027
28	24	NaN	NaN	28.1333	NaN	NaN	71.3333	1028038	1028039	1028012	5	20.6667	24.6667	102804
28	26.1333	NaN	NaN	16.5333	NaN	NaN	95.3333	1028041	1028042	1028038	6	24	20.6667	1028012
28	NaN	NaN	20	NaN	NaN	20	121.467	1028044	1028045	1028041	7	26.1333	24	1028038
28	NaN	NaN	30	NaN	NaN	30	111.467	1028047	1028048	1028028	7	20.6667	21.8667	1028015
28	NaN	NaN	13.7333	NaN	NaN	13.7333	127.733	1028052	1028053	1028031	8	20.4	16.5333	1028027
28	25.7333	NaN	NaN	23.6	NaN	NaN	99.4667	1028055	1028056	1028039	6	28.1333	20.6667	1028012
28	NaN	NaN	16.2667	NaN	NaN	16.2667	125.2	1028058	1028059	1028055	7	25.7333	28.1333	1028039
28	24.2667	NaN	NaN	22.1333	NaN	NaN	111.867	1028062	1028061	1028042	7	16.5333	24	1028038
28	NaN	NaN	5.33333	NaN	NaN	5.33333	136.133	1028063	1028064	1028062	8	24.2667	16.5333	1028042
28	NaN	NaN	18.4	NaN	NaN	18.4	123.067	1028066	1028067	1028056	7	23.6	28.1333	1028039
28	NaN	NaN	7.46667	NaN	NaN	7.46667	134	1028069	1028070	1028061	8	22.1333	16.5333	1028042
29	22.8	NaN	NaN	24	NaN	NaN	12.4	102902	102903	102901	2	NaN	NaN	1029000
29	18.9333	NaN	NaN	24.4	NaN	NaN	35.2	102906	102905	102902	3	22.8	NaN	102901
29	21.4667	NaN	NaN	21.8667	NaN	NaN	54.1333	102908	102909	102906	4	18.9333	22.8	102902
29	23.2	NaN	NaN	24.9333	NaN	NaN	75.6	1029011	1029012	102908	5	21.4667	18.9333	102906
29	NaN	NaN	13.3333	21.6	NaN	NaN	98.8	1029014	1029015	1029011	6	23.2	21.4667	102908
29	24.2667	NaN	NaN	19.0667	NaN	NaN	36.4	1029018	1029019	102903	3	24	NaN	102901
29	NaN	NaN	14.1333	37.2	NaN	NaN	60.6667	1029021	1029022	1029018	4	24.2667	24	102903
29	NaN	NaN	21.6	22.5333	NaN	NaN	59.6	1029025	1029026	102905	4	24.4	22.8	102902
29	24.5333	NaN	NaN	29.0667	NaN	NaN	76	1029029	1029030	102909	5	21.8667	18.9333	102906
29	28.6667	NaN	NaN	NaN	NaN	14.2667	100.533	1029032	1029033	1029029	6	24.5333	21.8667	102909
29	NaN	NaN	12.2667	NaN	NaN	12.2667	129.2	1029035	1029036	1029032	7	28.6667	24.5333	1029029
29	19.6	NaN	NaN	21.4667	NaN	NaN	100.533	1029038	1029039	1029012	6	24.9333	21.4667	102908
29	NaN	NaN	21.3333	NaN	NaN	21.3333	120.133	1029040	1029041	1029038	7	19.6	24.9333	1029012
29	NaN	NaN	21.0667	NaN	NaN	21.0667	120.4	1029043	1029044	1029015	7	21.6	23.2	1029011
29	27.2	NaN	NaN	21.2	NaN	NaN	55.4667	1029046	1029047	1029019	4	19.0667	24	102903
29	31.6	NaN	NaN	NaN	NaN	39.2	82.6667	1029049	1029050	1029046	5	27.2	19.0667	1029019
29	NaN	NaN	27.2	NaN	NaN	27.2	114.267	1029052	1029053	1029049	6	31.6	27.2	1029046
29	NaN	NaN	43.6	NaN	NaN	42.2667	97.8667	1029055	1029056	1029022	5	37.2	24.2667	1029018
29	25.3333	NaN	NaN	22.6667	NaN	NaN	105.067	1029062	1029063	1029030	6	29.0667	21.8667	102909
29	NaN	NaN	11.0667	NaN	NaN	11.0667	130.4	1029065	1029066	1029062	7	25.3333	29.0667	1029030
29	NaN	NaN	37.8667	30.6667	NaN	NaN	76.6667	1029068	1029069	1029047	5	21.2	19.0667	1029019
29	23.3333	NaN	NaN	26.8	NaN	NaN	82.1333	1029059	1029060	1029026	5	22.5333	24.4	102905
29	30.4	NaN	NaN	25.8667	NaN	NaN	105.467	1029073	1029074	1029059	6	23.3333	22.5333	1029026
29	NaN	NaN	5.6	NaN	NaN	5.6	135.867	1029075	1029076	1029073	7	30.4	23.3333	1029059
29	NaN	NaN	10.1333	NaN	NaN	10.1333	131.333	1029078	1029079	1029074	7	25.8667	23.3333	1029059
29	NaN	NaN	19.4667	NaN	NaN	19.4667	122	1029082	1029083	1029039	7	21.4667	24.9333	1029012
29	NaN	NaN	22.9333	NaN	NaN	7.73333	108.933	1029087	1029088	1029060	6	26.8	22.5333	1029026
29	NaN	NaN	13.7333	NaN	NaN	13.7333	127.733	1029092	1029093	1029063	7	22.6667	29.0667	1029030
29	NaN	NaN	34.1333	NaN	NaN	14.9333	107.333	1029095	1029096	1029069	6	30.6667	21.2	1029047

## Sheet: rap1
Lineage ID	Sibling 1 cycle length	Sibling 1 time to death	Sibling 1 time to cell loss	Sibling 2 cycle length	Sibling 2 time to death	Sibling 2 time to cell loss	Birth time	Sibling 1 ID	Sibling 2 ID	Mother ID	Generation	Mother cycle length	Grandmother cycle length	Grandmother ID
1	22	NaN	NaN	23.2	NaN	NaN	3.3	10102	10103	10101	2	NaN	NaN	101000
1	21.2	NaN	NaN	23.2	NaN	NaN	25.3	10105	10106	10102	3	22	NaN	10101
1	20.2	NaN	NaN	24.3	NaN	NaN	46.5	10109	101010	10105	4	21.2	22	10102
1	22.3	NaN	NaN	23.8	NaN	NaN	66.7	101012	101013	10109	5	20.2	21.2	10105
1	NaN	NaN	7.3	NaN	NaN	26	89	101015	101016	101012	6	22.3	20.2	10109
1	26.4	NaN	NaN	21.2	NaN	NaN	48.5	101019	101020	10106	4	23.2	22	10102
1	25.5	NaN	NaN	25	NaN	NaN	74.9	101022	101023	101019	5	26.4	23.2	10106
1	NaN	NaN	14.6	NaN	NaN	14.6	100.4	101025	101026	101022	6	25.5	26.4	101019
1	NaN	NaN	5.6	18.9	NaN	NaN	70.8	101028	101029	101010	5	24.3	21.2	10105
1	NaN	NaN	25.3	NaN	NaN	25.3	89.7	101032	101033	101029	6	18.9	24.3	101010
1	NaN	NaN	24.5	NaN	NaN	24.5	90.5	101038	101039	101013	6	23.8	20.2	10109
1	20.2	NaN	NaN	18	NaN	NaN	69.7	101044	101045	101020	5	21.2	23.2	10106
1	NaN	NaN	25.1	NaN	NaN	25.1	89.9	101046	101047	101044	6	20.2	21.2	101020
1	24.3	NaN	NaN	25.6	NaN	NaN	87.7	101051	101052	101045	6	18	21.2	101020
1	NaN	NaN	3	NaN	NaN	3	112	101054	101055	101051	7	24.3	18	101045
1	NaN	NaN	15.1	NaN	NaN	15.1	99.9	101057	101058	101023	6	25	26.4	101019
1	NaN	NaN	1.7	NaN	NaN	1.7	113.3	101060	101061	101052	7	25.6	18	101045
1	21.7	NaN	NaN	22.4	NaN	NaN	26.5	101063	101064	10103	3	23.2	NaN	10101
1	22.5	NaN	NaN	22.1	NaN	NaN	48.2	101066	101067	101063	4	21.7	23.2	10103
1	22.3	NaN	NaN	21.7	NaN	NaN	70.7	101069	101070	101066	5	22.5	21.7	101063
1	NaN	NaN	22	NaN	NaN	22	93	101072	101073	101069	6	22.3	22.5	101066
1	20.2	NaN	NaN	20.7	NaN	NaN	48.9	101077	101078	101064	4	22.4	23.2	10103
1	20	NaN	NaN	19.4	NaN	NaN	69.1	101080	101081	101077	5	20.2	22.4	101064
1	NaN	NaN	25.9	NaN	NaN	25.9	89.1	101082	101083	101080	6	20	20.2	101077
1	22.3	NaN	NaN	NaN	NaN	19	70.3	101086	101087	101067	5	22.1	21.7	101063
1	NaN	NaN	0.2	NaN	NaN	0.2	92.6	101088	101089	101086	6	22.3	22.1	101067
1	NaN	NaN	22.6	NaN	NaN	22.6	92.4	101092	101093	101070	6	21.7	22.5	101066
1	NaN	NaN	15.7	22.1	NaN	NaN	69.6	101097	101098	101078	5	20.7	22.4	101064
1	NaN	NaN	4.5	NaN	NaN	23.3	91.7	1010101	1010102	101098	6	22.1	20.7	101078
1	NaN	NaN	26.5	NaN	NaN	26.5	88.5	1010105	1010106	101081	6	19.4	20.2	101077
2	27	NaN	NaN	26.8	NaN	NaN	1	10202	10203	10201	2	NaN	NaN	102000
2	28	NaN	NaN	31.4	NaN	NaN	27.8	10207	10208	10203	3	26.8	NaN	10201
2	33.1	NaN	NaN	35.6	NaN	NaN	55.8	102011	102012	10207	4	28	26.8	10203
2	NaN	NaN	26.1	NaN	NaN	26.1	88.9	102014	102015	102011	5	33.1	28	10207
2	NaN	19.1	NaN	NaN	NaN	23.6	91.4	102019	102020	102012	5	35.6	28	10207
2	30.3	NaN	NaN	32.8	NaN	NaN	28	10205	10206	10202	3	27	NaN	10201
2	31.1	NaN	NaN	26.3	NaN	NaN	58.3	102024	102025	10205	4	30.3	27	10202
2	NaN	NaN	25.6	NaN	NaN	25.6	89.4	102027	102028	102024	5	31.1	30.3	10205
2	26.2	NaN	NaN	23.1	NaN	NaN	84.6	102032	102033	102025	5	26.3	30.3	10205
2	NaN	NaN	4.2	NaN	NaN	4.2	110.8	102034	102035	102032	6	26.2	26.3	102025
2	NaN	NaN	7.3	NaN	NaN	7.3	107.7	102036	102037	102033	6	23.1	26.3	102025
2	33.2	NaN	NaN	33.9	NaN	NaN	60.8	102039	102040	10206	4	32.8	27	10202
2	NaN	NaN	21	NaN	NaN	21	94	102042	102043	102039	5	33.2	32.8	10206
2	NaN	NaN	20.3	NaN	NaN	20.3	94.7	102047	102048	102040	5	33.9	32.8	10206
2	27.4	NaN	NaN	30.8	NaN	NaN	59.2	102051	102052	10208	4	31.4	26.8	10203
2	26.2	NaN	NaN	27.5	NaN	NaN	86.6	102054	102055	102051	5	27.4	31.4	10208
2	NaN	NaN	2.2	NaN	NaN	2.2	112.8	102056	102057	102054	6	26.2	27.4	102051
2	NaN	NaN	0.9	NaN	NaN	0.9	114.1	102058	102059	102055	6	27.5	27.4	102051
2	NaN	NaN	25	NaN	NaN	25	90	102061	102062	102052	5	30.8	31.4	10208
3	18.6	NaN	NaN	22.4	NaN	NaN	1.5	10302	10303	10301	2	NaN	NaN	103000
3	25.4	NaN	NaN	23.7	NaN	NaN	23.9	10307	10308	10303	3	22.4	NaN	10301
3	23.3	NaN	NaN	24.1	NaN	NaN	49.3	103011	103012	10307	4	25.4	22.4	10303
3	25.5	NaN	NaN	23.9	NaN	NaN	72.6	103014	103015	103011	5	23.3	25.4	10307
3	NaN	NaN	14.8	NaN	NaN	16.9	98.1	103017	103018	103014	6	25.5	23.3	103011
3	27.2	NaN	NaN	25	NaN	NaN	47.6	103022	103023	10308	4	23.7	22.4	10303
3	29.1	NaN	NaN	29.1	NaN	NaN	74.8	103025	103026	103022	5	27.2	23.7	10308
3	NaN	NaN	11.1	NaN	NaN	11.1	103.9	103027	103028	103025	6	29.1	27.2	103022
3	24.9	NaN	NaN	23.3	NaN	NaN	73.4	103030	103031	103012	5	24.1	25.4	10307
3	NaN	NaN	16.7	NaN	NaN	16.7	98.3	103033	103034	103030	6	24.9	24.1	103012
3	NaN	NaN	18.3	NaN	NaN	18.3	96.7	103037	103038	103031	6	23.3	24.1	103012
3	NaN	NaN	18.5	NaN	NaN	18.5	96.5	103041	103042	103015	6	23.9	23.3	103011
3	23.9	NaN	NaN	25.2	NaN	NaN	72.6	103044	103045	103023	5	25	23.7	10308
3	NaN	NaN	18.5	NaN	NaN	18.5	96.5	103047	103048	103044	6	23.9	25	103023
3	NaN	NaN	11.1	NaN	NaN	11.1	103.9	103051	103052	103026	6	29.1	27.2	103022
3	21	NaN	NaN	NaN	NaN	11.7	20.1	10305	10306	10302	3	18.6	NaN	10301
3	22	NaN	NaN	19.9	NaN	NaN	41.1	103055	103056	10305	4	21	18.6	10302
3	21.8	NaN	NaN	19.3	NaN	NaN	63.1	103058	103059	103055	5	22	21	10305
3	22.2	NaN	NaN	25.3	NaN	NaN	84.9	103061	103062	103058	6	21.8	22	103055
3	NaN	NaN	7.9	NaN	NaN	7.9	107.1	103063	103064	103061	7	22.2	21.8	103058
3	NaN	NaN	4.8	NaN	NaN	4.8	110.2	103066	103067	103062	7	25.3	21.8	103058
3	24.1	NaN	NaN	21.9	NaN	NaN	82.4	103069	103070	103059	6	19.3	22	103055
3	NaN	NaN	8.5	NaN	NaN	8.5	106.5	103072	103073	103069	7	24.1	19.3	103059
3	NaN	NaN	10.7	NaN	NaN	10.7	104.3	103074	103075	103070	7	21.9	19.3	103059
3	19.3	NaN	NaN	20	NaN	NaN	61	103077	103078	103056	5	19.9	21	10305
3	22	NaN	NaN	25.1	NaN	NaN	80.3	103080	103081	103077	6	19.3	19.9	103056
3	NaN	NaN	12.7	NaN	NaN	12.7	102.3	103082	103083	103080	7	22	19.3	103077
3	NaN	NaN	9.6	NaN	NaN	9.6	105.4	103084	103085	103081	7	25.1	19.3	103077
3	27	NaN	NaN	27.6	NaN	NaN	81	103087	103088	103078	6	20	19.9	103056
3	NaN	NaN	7	NaN	NaN	7	108	103090	103091	103087	7	27	20	103078
3	NaN	NaN	6.4	NaN	NaN	6.4	108.6	103093	103094	103088	7	27.6	20	103078
3	NaN	NaN	17.2	NaN	NaN	17.2	97.8	103097	103098	103045	6	25.2	25	103023
4	23.9	NaN	NaN	23.2	NaN	NaN	1	10402	10403	10401	2	NaN	NaN	104000
4	27.8	NaN	NaN	23.3	NaN	NaN	24.9	10405	10406	10402	3	23.9	NaN	10401
4	42.1	NaN	NaN	NaN	22.6	NaN	52.7	104010	104011	10405	4	27.8	23.9	10402
4	NaN	NaN	20.2	NaN	NaN	20.2	94.8	104014	104015	104010	5	42.1	27.8	10405
4	26.1	NaN	NaN	22.2	NaN	NaN	48.2	104019	104020	10406	4	23.3	23.9	10402
4	27.4	NaN	NaN	29.4	NaN	NaN	74.3	104022	104023	104019	5	26.1	23.3	10406
4	NaN	NaN	13.3	NaN	NaN	13.3	101.7	104025	104026	104022	6	27.4	26.1	104019
4	NaN	NaN	11.3	NaN	NaN	11.3	103.7	104028	104029	104023	6	29.4	26.1	104019
4	20.7	NaN	NaN	19.4	NaN	NaN	70.4	104031	104032	104020	5	22.2	23.3	10406
4	NaN	NaN	23.9	NaN	NaN	23.9	91.1	104033	104034	104031	6	20.7	22.2	104020
4	23.7	NaN	NaN	23	NaN	NaN	89.8	104037	104038	104032	6	19.4	22.2	104020
4	NaN	NaN	1.5	NaN	NaN	1.5	113.5	104039	104040	104037	7	23.7	19.4	104032
4	NaN	NaN	2.2	NaN	NaN	2.2	112.8	104041	104042	104038	7	23	19.4	104032
4	22.1	NaN	NaN	24	NaN	NaN	24.2	10408	10409	10403	3	23.2	NaN	10401
4	21.4	NaN	NaN	22.6	NaN	NaN	46.3	104044	104045	10408	4	22.1	23.2	10403
4	25.4	NaN	NaN	22.9	NaN	NaN	67.7	104047	104048	104044	5	21.4	22.1	10408
4	NaN	NaN	21.9	NaN	NaN	21.9	93.1	104050	104051	104047	6	25.4	21.4	104044
4	NaN	NaN	24.4	22.7	NaN	NaN	90.6	104056	104057	104048	6	22.9	21.4	104044
4	NaN	NaN	1.7	NaN	NaN	1.7	113.3	104059	104060	104057	7	22.7	22.9	104048
4	25.3	NaN	NaN	26.1	NaN	NaN	68.9	104061	104062	104045	5	22.6	22.1	10408
4	NaN	NaN	20.8	NaN	NaN	20.8	94.2	104064	104065	104061	6	25.3	22.6	104045
4	NaN	NaN	20	NaN	NaN	20	95	104069	104070	104062	6	26.1	22.6	104045
4	22.3	NaN	NaN	25.9	NaN	NaN	48.2	104074	104075	10409	4	24	23.2	10403
4	20	NaN	NaN	19.4	NaN	NaN	70.5	104077	104078	104074	5	22.3	24	10409
4	NaN	NaN	24.5	NaN	NaN	24.5	90.5	104080	104081	104077	6	20	22.3	104074
4	NaN	NaN	25.1	NaN	NaN	25.1	89.9	104086	104087	104078	6	19.4	22.3	104074
4	22	NaN	NaN	28.5	NaN	NaN	74.1	104091	104092	104075	5	25.9	24	10409
4	NaN	NaN	18.9	NaN	NaN	18.9	96.1	104094	104095	104091	6	22	25.9	104075
4	NaN	NaN	12.4	NaN	NaN	12.4	102.6	104098	104099	104092	6	28.5	25.9	104075
5	22.1	NaN	NaN	20.4	NaN	NaN	1.4	10502	10503	10501	2	NaN	NaN	105000
5	26.2	NaN	NaN	27.7	NaN	NaN	21.8	10508	10509	10503	3	20.4	NaN	10501
5	25.3	NaN	NaN	19.6	NaN	NaN	48	105011	105012	10508	4	26.2	20.4	10503
5	32.2	NaN	NaN	29.7	NaN	NaN	73.3	105014	105015	105011	5	25.3	26.2	10508
5	NaN	NaN	9.5	NaN	NaN	9.5	105.5	105017	105018	105014	6	32.2	25.3	105011
5	24.1	NaN	NaN	25.4	NaN	NaN	23.5	10505	10506	10502	3	22.1	NaN	10501
5	22.3	NaN	NaN	26.5	NaN	NaN	47.6	105020	105021	10505	4	24.1	22.1	10502
5	21.7	NaN	NaN	22.9	NaN	NaN	69.9	105023	105024	105020	5	22.3	24.1	10505
5	NaN	NaN	23.4	NaN	NaN	23.4	91.6	105026	105027	105023	6	21.7	22.3	105020
5	26.3	NaN	NaN	24	NaN	NaN	48.9	105031	105032	10506	4	25.4	22.1	10502
5	26.8	NaN	NaN	26.8	NaN	NaN	75.2	105034	105035	105031	5	26.3	25.4	10506
5	NaN	NaN	13	NaN	NaN	13	102	105037	105038	105034	6	26.8	26.3	105031
5	22.7	NaN	NaN	26.7	NaN	NaN	49.5	105040	105041	10509	4	27.7	20.4	10503
5	23.4	NaN	NaN	27.4	NaN	NaN	72.2	105043	105044	105040	5	22.7	27.7	10509
5	NaN	NaN	19.4	NaN	NaN	19.4	95.6	105045	105046	105043	6	23.4	22.7	105040
5	21.5	NaN	NaN	22.5	NaN	NaN	67.6	105051	105052	105012	5	19.6	26.2	10508
5	NaN	NaN	25.9	NaN	NaN	25.9	89.1	105054	105055	105051	6	21.5	19.6	105012
5	NaN	NaN	12	NaN	NaN	12	103	105059	105060	105015	6	29.7	25.3	105011
5	30.5	NaN	NaN	33.6	NaN	NaN	74.1	105062	105063	105021	5	26.5	24.1	10505
5	NaN	NaN	10.4	NaN	NaN	10.4	104.6	105065	105066	105062	6	30.5	26.5	105021
5	NaN	NaN	7.3	NaN	NaN	7.3	107.7	105068	105069	105063	6	33.6	26.5	105021
5	NaN	NaN	22.2	NaN	NaN	22.2	92.8	105071	105072	105024	6	22.9	22.3	105020
5	NaN	NaN	13	NaN	NaN	13	102	105076	105077	105035	6	26.8	26.3	105031
5	27.4	NaN	NaN	29.1	NaN	NaN	72.9	105079	105080	105032	5	24	25.4	10506
5	NaN	NaN	14.7	NaN	NaN	14.7	100.3	105082	105083	105079	6	27.4	24	105032
5	NaN	NaN	13	NaN	NaN	13	102	105086	105087	105080	6	29.1	24	105032
5	26.9	NaN	NaN	26.9	NaN	NaN	76.2	105089	105090	105041	5	26.7	27.7	10509
5	NaN	NaN	11.9	NaN	NaN	11.9	103.1	105092	105093	105089	6	26.9	26.7	105041
5	NaN	NaN	11.9	NaN	NaN	11.9	103.1	105095	105096	105090	6	26.9	26.7	105041
5	NaN	NaN	15.4	NaN	NaN	15.4	99.6	105098	105099	105044	6	27.4	22.7	105040
5	NaN	NaN	24.9	NaN	NaN	24.9	90.1	1050104	1050103	105052	6	22.5	19.6	105012
6	26	NaN	NaN	23.8	NaN	NaN	1.6	10602	10603	10601	2	NaN	NaN	106000
6	29	NaN	NaN	21.9	NaN	NaN	25.4	10608	10609	10603	3	23.8	NaN	10601
6	29.7	NaN	NaN	25.9	NaN	NaN	54.4	106011	106012	10608	4	29	23.8	10603
6	24.3	NaN	NaN	28.5	NaN	NaN	84.1	106014	106015	106011	5	29.7	29	10608
6	NaN	NaN	6.6	NaN	NaN	6.6	108.4	106017	106018	106014	6	24.3	29.7	106011
6	23.2	NaN	NaN	22.2	NaN	NaN	27.6	10605	10606	10602	3	26	NaN	10601
6	25.3	NaN	NaN	24	NaN	NaN	50.8	106020	106021	10605	4	23.2	26	10602
6	25.4	NaN	NaN	23.1	NaN	NaN	76.1	106023	106024	106020	5	25.3	23.2	10605
6	NaN	NaN	13.5	NaN	NaN	13.5	101.5	106026	106027	106023	6	25.4	25.3	106020
6	NaN	NaN	0.7	NaN	NaN	0.7	47.3	106029	106030	10609	4	21.9	23.8	10603
6	24.8	NaN	NaN	NaN	NaN	12	80.3	106033	106034	106012	5	25.9	29	10608
6	NaN	NaN	9.9	NaN	NaN	9.9	105.1	106036	106037	106033	6	24.8	25.9	106012
6	NaN	NaN	2.4	NaN	NaN	2.4	112.6	106040	106041	106015	6	28.5	29.7	106011
6	24.9	NaN	NaN	21.7	NaN	NaN	74.8	106043	106044	106021	5	24	23.2	10605
6	NaN	NaN	15.3	NaN	NaN	15.3	99.7	106045	106046	106043	6	24.9	24	106021
6	NaN	NaN	18.5	NaN	NaN	18.5	96.5	106049	106050	106044	6	21.7	24	106021
6	NaN	NaN	0.4	NaN	NaN	0.4	99.2	106055	106056	106024	6	23.1	25.3	106020
6	22.2	NaN	NaN	24.8	NaN	NaN	49.8	106058	106059	10606	4	22.2	26	10602
6	26.2	NaN	NaN	24.7	NaN	NaN	72	106061	106062	106058	5	22.2	22.2	10606
6	NaN	NaN	16.8	NaN	NaN	16.8	98.2	106064	106065	106061	6	26.2	22.2	106058
6	NaN	NaN	18.3	NaN	NaN	18.3	96.7	106069	106070	106062	6	24.7	22.2	106058
6	NaN	NaN	1.5	25.8	NaN	NaN	74.6	106072	106073	106059	5	24.8	22.2	10606
6	NaN	NaN	14.6	NaN	NaN	14.6	100.4	106075	106076	106073	6	25.8	24.8	106059
7	20.8	NaN	NaN	22	NaN	NaN	0.6	10702	10703	10701	2	NaN	NaN	107000
7	NaN	NaN	2	30.2	NaN	NaN	22.6	10708	10709	10703	3	22	NaN	10701
7	NaN	NaN	2.4	NaN	NaN	13.1	52.8	107012	107013	10709	4	30.2	22	10703
7	24.6	NaN	NaN	28.9	NaN	NaN	21.4	10705	10706	10702	3	20.8	NaN	10701
7	25.4	NaN	NaN	NaN	NaN	10.8	46	107016	107017	10705	4	24.6	20.8	10702
7	23.4	NaN	NaN	28.1	NaN	NaN	71.4	107019	107020	107016	5	25.4	24.6	10705
7	NaN	NaN	20.2	NaN	NaN	20.2	94.8	107022	107023	107019	6	23.4	25.4	107016
7	NaN	NaN	12.7	NaN	NaN	15.5	99.5	107028	107029	107020	6	28.1	25.4	107016
7	25.9	NaN	NaN	25	NaN	NaN	50.3	107033	107034	10706	4	28.9	20.8	10702
7	29.4	NaN	NaN	27.8	NaN	NaN	76.2	107036	107037	107033	5	25.9	28.9	10706
7	NaN	NaN	9.4	NaN	NaN	9.4	105.6	107039	107040	107036	6	29.4	25.9	107033
7	NaN	NaN	11	NaN	NaN	11	104	107042	107043	107037	6	27.8	25.9	107033
7	26.1	NaN	NaN	NaN	NaN	20.8	75.3	107045	107046	107034	5	25	28.9	10706
7	NaN	NaN	13.6	NaN	NaN	13.6	101.4	107047	107048	107045	6	26.1	25	107034
8	21.2	NaN	NaN	18.3	NaN	NaN	0.5	10802	10803	10801	2	NaN	NaN	108000
8	29.9	NaN	NaN	27.3	NaN	NaN	21.7	10804	10805	10802	3	21.2	NaN	10801
8	NaN	NaN	0.2	NaN	NaN	0.2	51.6	10808	10809	10804	4	29.9	21.2	10802
8	27.3	NaN	NaN	28	NaN	NaN	49	108012	108013	10805	4	27.3	21.2	10802
8	23.8	NaN	NaN	20.2	NaN	NaN	76.3	108015	108016	108012	5	27.3	27.3	10805
8	NaN	NaN	14.9	NaN	NaN	14.9	100.1	108018	108019	108015	6	23.8	27.3	108012
8	NaN	NaN	18.5	NaN	NaN	18.5	96.5	108023	108024	108016	6	20.2	27.3	108012
8	NaN	NaN	22	23.6	NaN	NaN	77	108028	108029	108013	5	28	27.3	10805
8	NaN	NaN	14.4	NaN	NaN	14.4	100.6	108032	108033	108029	6	23.6	28	108013
8	20.3	NaN	NaN	21	NaN	NaN	18.8	10806	10807	10803	3	18.3	NaN	10801
8	NaN	NaN	17.1	23.2	NaN	NaN	39.1	108035	108036	10806	4	20.3	18.3	10803
8	NaN	NaN	17.3	NaN	NaN	16.2	62.3	108039	108040	108036	5	23.2	20.3	10806
8	17.3	NaN	NaN	20.9	NaN	NaN	39.8	108044	108045	10807	4	21	18.3	10803
8	NaN	NaN	4.8	NaN	NaN	21.7	57.1	108046	108047	108044	5	17.3	21	10807
8	18.4	NaN	NaN	19.3	NaN	NaN	60.7	108052	108053	108045	5	20.9	21	10807
8	26.4	NaN	NaN	23.3	NaN	NaN	79.1	108055	108056	108052	6	18.4	20.9	108045
8	NaN	NaN	9.5	NaN	NaN	9.5	105.5	108058	108059	108055	7	26.4	18.4	108052
8	NaN	NaN	12.6	NaN	NaN	12.6	102.4	108062	108063	108056	7	23.3	18.4	108052
8	24.6	NaN	NaN	26.3	NaN	NaN	80	108065	108066	108053	6	19.3	20.9	108045
8	NaN	NaN	10.4	NaN	NaN	10.4	104.6	108068	108069	108065	7	24.6	19.3	108053
8	NaN	NaN	8.7	NaN	NaN	8.7	106.3	108071	108072	108066	7	26.3	19.3	108053
9	24	NaN	NaN	23.7	NaN	NaN	1	10902	10903	10901	2	NaN	NaN	109000
9	25.3	NaN	NaN	28.4	NaN	NaN	24.7	10909	109010	10903	3	23.7	NaN	10901
9	22.7	NaN	NaN	27.2	NaN	NaN	50	109012	109013	10909	4	25.3	23.7	10903
9	26.2	NaN	NaN	24.2	NaN	NaN	72.7	109015	109016	109012	5	22.7	25.3	10909
9	NaN	NaN	16.1	NaN	NaN	16.1	98.9	109018	109019	109015	6	26.2	22.7	109012
9	NaN	NaN	18.1	NaN	NaN	18.1	96.9	109023	109024	109016	6	24.2	22.7	109012
9	24.5	NaN	NaN	25.2	NaN	NaN	77.2	109028	109029	109013	5	27.2	25.3	10909
9	NaN	NaN	13.3	NaN	NaN	13.3	101.7	109031	109032	109028	6	24.5	27.2	109013
9	NaN	NaN	12.6	NaN	NaN	12.6	102.4	109034	109035	109029	6	25.2	27.2	109013
9	23	NaN	NaN	23.7	NaN	NaN	53.1	109037	109038	109010	4	28.4	23.7	10903
9	27.5	NaN	NaN	26.1	NaN	NaN	76.1	109040	109041	109037	5	23	28.4	109010
9	NaN	NaN	11.4	NaN	NaN	11.4	103.6	109043	109044	109040	6	27.5	23	109037
9	NaN	NaN	12.8	NaN	NaN	12.8	102.2	109046	109047	109041	6	26.1	23	109037
9	NaN	NaN	6.3	25.4	NaN	NaN	76.8	109049	109050	109038	5	23.7	28.4	109010
9	NaN	NaN	12.8	NaN	NaN	12.8	102.2	109053	109054	109050	6	25.4	23.7	109038
9	24.3	NaN	NaN	24.2	NaN	NaN	25	10905	10906	10902	3	24	NaN	10901
9	25.8	NaN	NaN	26.8	NaN	NaN	49.3	109056	109057	10905	4	24.3	24	10902
9	24	NaN	NaN	24	NaN	NaN	75.1	109059	109060	109056	5	25.8	24.3	10905
9	NaN	NaN	15.9	NaN	NaN	15.9	99.1	109062	109063	109059	6	24	25.8	109056
9	NaN	NaN	15.9	NaN	NaN	15.9	99.1	109066	109067	109060	6	24	25.8	109056
9	21.7	NaN	NaN	23.1	NaN	NaN	76.1	109072	109071	109057	5	26.8	24.3	10905
9	NaN	NaN	17.2	NaN	NaN	17.2	97.8	109074	109075	109072	6	21.7	26.8	109057
9	NaN	NaN	2.5	NaN	NaN	6	99.2	109079	109080	109071	6	23.1	26.8	109057
9	23.9	NaN	NaN	23.7	NaN	NaN	49.2	109084	109085	10906	4	24.2	24	10902
9	21.6	NaN	NaN	22.2	NaN	NaN	73.1	109088	109087	109084	5	23.9	24.2	10906
9	NaN	NaN	20.3	NaN	NaN	20.3	94.7	109090	109091	109088	6	21.6	23.9	109084
9	21	NaN	NaN	20.8	NaN	NaN	72.9	109095	109096	109085	5	23.7	24.2	10906
9	NaN	NaN	21.1	NaN	NaN	21.1	93.9	109098	109099	109095	6	21	23.7	109085
9	NaN	NaN	21.3	NaN	NaN	21.3	93.7	1090103	1090104	109096	6	20.8	23.7	109085
9	NaN	NaN	19.7	NaN	NaN	19.7	95.3	1090108	1090109	109087	6	22.2	23.9	109084
10	NaN	NaN	21.3	22.7	NaN	NaN	0.6	101002	101003	101001	2	NaN	NaN	1010000
10	33.4	NaN	NaN	28.4	NaN	NaN	23.3	101007	101008	101003	3	22.7	NaN	101001
10	NaN	NaN	6.6	NaN	NaN	25.4	56.7	1010010	1010011	101007	4	33.4	22.7	101003
10	NaN	NaN	2.6	NaN	NaN	8	51.7	1010016	1010017	101008	4	28.4	22.7	101003
11	26.9	NaN	NaN	26.3	NaN	NaN	1.8	101102	101103	101101	2	NaN	NaN	1011000
11	22.2	NaN	NaN	24.9	NaN	NaN	28.7	101105	101106	101102	3	26.9	NaN	101101
11	21.9	NaN	NaN	21.1	NaN	NaN	50.9	1011010	1011011	101105	4	22.2	26.9	101102
11	23.2	NaN	NaN	22.8	NaN	NaN	72.8	1011014	1011015	1011010	5	21.9	22.2	101105
11	NaN	NaN	19	NaN	NaN	19	96	1011017	1011018	1011014	6	23.2	21.9	1011010
11	NaN	NaN	19.4	NaN	NaN	19.4	95.6	1011022	1011023	1011015	6	22.8	21.9	1011010
11	23.4	NaN	NaN	27.6	NaN	NaN	72	1011026	1011027	1011011	5	21.1	22.2	101105
11	NaN	NaN	19.6	NaN	NaN	19.6	95.4	1011029	1011030	1011026	6	23.4	21.1	1011011
11	NaN	NaN	15.4	NaN	NaN	15.4	99.6	1011034	1011035	1011027	6	27.6	21.1	1011011
11	21.9	NaN	NaN	21	NaN	NaN	53.6	1011039	1011040	101106	4	24.9	26.9	101102
11	25	NaN	NaN	21.8	NaN	NaN	75.5	1011042	1011043	1011039	5	21.9	24.9	101106
11	NaN	NaN	14.5	NaN	NaN	14.5	100.5	1011045	1011046	1011042	6	25	21.9	1011039
11	NaN	NaN	17.7	NaN	NaN	17.7	97.3	1011048	1011049	1011043	6	21.8	21.9	1011039
11	22.3	NaN	NaN	23.5	NaN	NaN	74.6	1011053	1011054	1011040	5	21	24.9	101106
11	NaN	NaN	18.1	NaN	NaN	18.1	96.9	1011056	1011057	1011053	6	22.3	21	1011040
11	NaN	NaN	16.9	NaN	NaN	16.9	98.1	1011061	1011062	1011054	6	23.5	21	1011040
11	22.8	NaN	NaN	24.4	NaN	NaN	28.1	101108	101109	101103	3	26.3	NaN	101101
11	24.3	NaN	NaN	23.6	NaN	NaN	50.9	1011066	1011067	101108	4	22.8	26.3	101103
11	21.1	NaN	NaN	24.6	NaN	NaN	75.2	1011069	1011070	1011066	5	24.3	22.8	101108
11	NaN	NaN	18.7	NaN	NaN	18.7	96.3	1011072	1011073	1011069	6	21.1	24.3	1011066
11	NaN	NaN	15.2	NaN	NaN	15.2	99.8	1011076	1011077	1011070	6	24.6	24.3	1011066
11	25	NaN	NaN	29.2	NaN	NaN	74.5	1011080	1011081	1011067	5	23.6	22.8	101108
11	NaN	NaN	15.5	NaN	NaN	15.5	99.5	1011083	1011084	1011080	6	25	23.6	1011067
11	NaN	NaN	11.3	NaN	NaN	11.3	103.7	1011087	1011088	1011081	6	29.2	23.6	1011067
11	23.1	NaN	NaN	21.2	NaN	NaN	52.5	1011090	1011091	101109	4	24.4	26.3	101103
11	24.5	NaN	NaN	26.2	NaN	NaN	75.6	1011093	1011094	1011090	5	23.1	24.4	101109
11	NaN	NaN	14.9	NaN	NaN	14.9	100.1	1011096	1011097	1011093	6	24.5	23.1	1011090
11	NaN	NaN	13.2	NaN	NaN	13.2	101.8	1011099	10110100	1011094	6	26.2	23.1	1011090
11	20.6	NaN	NaN	22.6	NaN	NaN	73.7	10110102	10110103	1011091	5	21.2	24.4	101109
11	NaN	NaN	20.7	NaN	NaN	20.7	94.3	10110105	10110106	10110102	6	20.6	21.2	1011091
11	NaN	NaN	18.7	NaN	NaN	18.7	96.3	10110110	10110111	10110103	6	22.6	21.2	1011091
12	25.7	NaN	NaN	22	NaN	NaN	2.1	101202	101203	101201	2	NaN	NaN	1012000
12	27.7	NaN	NaN	28.4	NaN	NaN	24.1	101208	101209	101203	3	22	NaN	101201
12	25.2	NaN	NaN	25.5	NaN	NaN	51.8	1012011	1012012	101208	4	27.7	22	101203
12	30.6	NaN	NaN	27.8	NaN	NaN	77	1012014	1012015	1012011	5	25.2	27.7	101208
12	NaN	NaN	7.4	NaN	NaN	7.4	107.6	1012017	1012018	1012014	6	30.6	25.2	1012011
12	NaN	NaN	10.2	NaN	NaN	10.2	104.8	1012020	1012021	1012015	6	27.8	25.2	1012011
12	28.4	NaN	NaN	27.7	NaN	NaN	77.3	1012023	1012024	1012012	5	25.5	27.7	101208
12	NaN	NaN	9.3	NaN	NaN	9.3	105.7	1012026	1012027	1012023	6	28.4	25.5	1012012
12	NaN	NaN	10	NaN	NaN	10	105	1012029	1012030	1012024	6	27.7	25.5	1012012
12	22.6	NaN	NaN	25	NaN	NaN	52.5	1012032	1012033	101209	4	28.4	22	101203
12	29.6	NaN	NaN	29.3	NaN	NaN	75.1	1012035	1012036	1012032	5	22.6	28.4	101209
12	NaN	NaN	10.3	NaN	NaN	10.3	104.7	1012038	1012039	1012035	6	29.6	22.6	1012032
12	28.3	NaN	NaN	27.5	NaN	NaN	77.5	1012041	1012042	1012033	5	25	28.4	101209
12	NaN	NaN	9.2	NaN	NaN	9.2	105.8	1012044	1012045	1012041	6	28.3	25	1012033
12	NaN	NaN	10	NaN	NaN	10	105	1012047	1012048	1012042	6	27.5	25	1012033
12	28.8	NaN	NaN	30	NaN	NaN	27.8	101205	101206	101202	3	25.7	NaN	101201
12	21.8	NaN	NaN	22.2	NaN	NaN	56.6	1012050	1012051	101205	4	28.8	25.7	101202
12	26.9	NaN	NaN	26.7	NaN	NaN	78.4	1012053	1012054	1012050	5	21.8	28.8	101205
12	NaN	NaN	9.7	NaN	NaN	9.7	105.3	1012056	1012057	1012053	6	26.9	21.8	1012050
12	NaN	NaN	9.9	NaN	NaN	9.9	105.1	1012059	1012060	1012054	6	26.7	21.8	1012050
12	33.5	NaN	NaN	32	NaN	NaN	78.8	1012090	1012091	1012051	5	22.2	28.8	101205
12	NaN	NaN	2.7	NaN	NaN	2.7	112.3	1012093	1012094	1012090	6	33.5	22.2	1012051
12	25.9	NaN	NaN	23.7	NaN	NaN	57.8	1012068	1012069	101206	4	30	25.7	101202
12	27.1	NaN	NaN	26.4	NaN	NaN	83.7	1012071	1012072	1012068	5	25.9	30	101206
12	NaN	NaN	4.2	NaN	NaN	4.2	110.8	1012073	1012074	1012071	6	27.1	25.9	1012068
12	NaN	NaN	4.9	NaN	NaN	4.9	110.1	1012076	1012077	1012072	6	26.4	25.9	1012068
12	31.3	NaN	NaN	27.3	NaN	NaN	81.5	1012079	1012080	1012069	5	23.7	30	101206
12	NaN	NaN	2.2	NaN	NaN	2.2	112.8	1012082	1012083	1012079	6	31.3	23.7	1012069
12	NaN	NaN	6.2	NaN	NaN	6.2	108.8	1012085	1012086	1012080	6	27.3	23.7	1012069
12	NaN	NaN	10.6	NaN	NaN	10.6	104.4	1012088	1012089	1012036	6	29.3	22.6	1012032
12	NaN	NaN	4.2	NaN	NaN	4.2	110.8	1012096	1012097	1012091	6	32	22.2	1012051
13	23.3	NaN	NaN	23.9	NaN	NaN	2.4	101302	101303	101301	2	NaN	NaN	1013000
13	25.1	NaN	NaN	22.8	NaN	NaN	26.3	101308	101309	101303	3	23.9	NaN	101301
13	23	NaN	NaN	22.2	NaN	NaN	51.4	1013011	1013012	101308	4	25.1	23.9	101303
13	NaN	NaN	4	NaN	NaN	9.4	74.4	1013013	1013014	1013011	5	23	25.1	101308
13	NaN	NaN	2.1	26.3	NaN	NaN	73.6	1013017	1013018	1013012	5	22.2	25.1	101308
13	NaN	NaN	15.1	NaN	NaN	15.1	99.9	1013021	1013022	1013018	6	26.3	22.2	1013012
13	26.7	NaN	NaN	20.5	NaN	NaN	49.1	1013024	1013025	101309	4	22.8	23.9	101303
13	22.2	NaN	NaN	25	NaN	NaN	75.8	1013027	1013028	1013024	5	26.7	22.8	101309
13	NaN	NaN	17	NaN	NaN	17	98	1013030	1013031	1013027	6	22.2	26.7	1013024
13	NaN	NaN	14.2	NaN	NaN	14.2	100.8	1013036	1013037	1013028	6	25	26.7	1013024
13	24.7	NaN	NaN	23.5	NaN	NaN	69.6	1013039	1013040	1013025	5	20.5	22.8	101309
13	NaN	NaN	20.7	NaN	NaN	20.7	94.3	1013042	1013043	1013039	6	24.7	20.5	1013025
13	NaN	NaN	21.9	NaN	NaN	21.9	93.1	1013048	1013049	1013040	6	23.5	20.5	1013025
13	23.5	NaN	NaN	24.5	NaN	NaN	25.7	101305	101306	101302	3	23.3	NaN	101301
13	NaN	NaN	0.3	NaN	NaN	0.3	49.2	1013052	1013053	101305	4	23.5	23.3	101302
13	23.1	NaN	NaN	NaN	NaN	22.4	50.2	1013055	1013056	101306	4	24.5	23.3	101302
13	27.8	NaN	NaN	27.4	NaN	NaN	73.3	1013058	1013059	1013055	5	23.1	24.5	101306
13	NaN	NaN	13.9	NaN	NaN	13.9	101.1	1013061	1013062	1013058	6	27.8	23.1	1013055
13	NaN	NaN	14.3	NaN	NaN	14.3	100.7	1013064	1013065	1013059	6	27.4	23.1	1013055
14	24.6	NaN	NaN	17.8	NaN	NaN	3.8	101402	101403	101401	2	NaN	NaN	1014000
14	21.6	NaN	NaN	18.1	NaN	NaN	21.6	101408	101409	101403	3	17.8	NaN	101401
14	17.6	NaN	NaN	19.1	NaN	NaN	39.7	1014014	1014015	101409	4	18.1	17.8	101403
14	17.7	NaN	NaN	18.6	NaN	NaN	57.3	1014017	1014018	1014014	5	17.6	18.1	101409
14	NaN	NaN	15.5	20.6	NaN	NaN	75	1014019	1014020	1014017	6	17.7	17.6	1014014
14	NaN	NaN	19.4	NaN	NaN	19.4	95.6	1014023	1014024	1014020	7	20.6	17.7	1014017
14	NaN	NaN	2.8	25.1	NaN	NaN	75.9	1014027	1014028	1014018	6	18.6	17.6	1014014
14	NaN	NaN	14	NaN	NaN	14	101	1014031	1014032	1014028	7	25.1	18.6	1014018
14	20.1	NaN	NaN	20.1	NaN	NaN	58.8	1014034	1014035	1014015	5	19.1	18.1	101409
14	20.1	NaN	NaN	21.7	NaN	NaN	78.9	1014037	1014038	1014034	6	20.1	19.1	1014015
14	NaN	NaN	7.3	NaN	NaN	3.1	99	1014040	1014041	1014037	7	20.1	20.1	1014034
14	NaN	NaN	14.4	NaN	NaN	14.4	100.6	1014045	1014046	1014038	7	21.7	20.1	1014034
14	24	NaN	NaN	24	NaN	NaN	78.9	1014048	1014049	1014035	6	20.1	19.1	1014015
14	NaN	NaN	12.1	NaN	NaN	12.1	102.9	1014050	1014051	1014048	7	24	20.1	1014035
14	NaN	NaN	12.1	NaN	NaN	12.1	102.9	1014053	1014054	1014049	7	24	20.1	1014035
14	26	NaN	NaN	NaN	NaN	14	43.2	1014011	1014012	101408	4	21.6	17.8	101403
14	20.1	NaN	NaN	20.2	NaN	NaN	69.2	1014056	1014057	1014011	5	26	21.6	101408
14	22.6	NaN	NaN	NaN	NaN	11.1	89.3	1014059	1014060	1014056	6	20.1	26	1014011
14	NaN	NaN	3.1	NaN	NaN	3.1	111.9	1014061	1014062	1014059	7	22.6	20.1	1014056
14	24.4	NaN	NaN	NaN	NaN	25.6	89.4	1014064	1014065	1014057	6	20.2	26	1014011
14	NaN	NaN	1.2	NaN	NaN	1.2	113.8	1014067	1014068	1014064	7	24.4	20.2	1014057
14	19.2	NaN	NaN	22	NaN	NaN	28.4	101405	101406	101402	3	24.6	NaN	101401
14	26.5	NaN	NaN	22.2	NaN	NaN	47.6	1014073	1014074	101405	4	19.2	24.6	101402
14	19.5	NaN	NaN	21	NaN	NaN	74.1	1014076	1014077	1014073	5	26.5	19.2	101405
14	NaN	NaN	21.4	NaN	NaN	21.4	93.6	1014079	1014080	1014076	6	19.5	26.5	1014073
14	NaN	NaN	19.9	NaN	NaN	19.9	95.1	1014084	1014085	1014077	6	21	26.5	1014073
14	19.3	NaN	NaN	20.6	NaN	NaN	69.8	1014090	1014091	1014074	5	22.2	19.2	101405
14	23.9	NaN	NaN	23.6	NaN	NaN	89.1	1014093	1014094	1014090	6	19.3	22.2	1014074
14	NaN	NaN	2	NaN	NaN	2	113	1014095	1014096	1014093	7	23.9	19.3	1014090
14	NaN	NaN	2.3	NaN	NaN	2.3	112.7	1014098	1014099	1014094	7	23.6	19.3	1014090
14	NaN	NaN	24.6	NaN	NaN	24.6	90.4	10140101	10140102	1014091	6	20.6	22.2	1014074
14	20.9	NaN	NaN	18	NaN	NaN	50.4	10140106	10140107	101406	4	22	24.6	101402
14	21.3	NaN	NaN	22.2	NaN	NaN	71.3	10140109	10140110	10140106	5	20.9	22	101406
14	NaN	NaN	22.4	NaN	NaN	22.4	92.6	10140112	10140113	10140109	6	21.3	20.9	10140106
14	NaN	NaN	21.5	NaN	NaN	21.5	93.5	10140117	10140118	10140110	6	22.2	20.9	10140106
14	18.8	NaN	NaN	17.2	NaN	NaN	68.4	10140123	10140124	10140107	5	18	22	101406
14	21.5	NaN	NaN	23.1	NaN	NaN	87.2	10140126	10140127	10140123	6	18.8	18	10140107
14	NaN	NaN	6.3	NaN	NaN	6.3	108.7	10140129	10140130	10140126	7	21.5	18.8	10140123
14	NaN	NaN	4.7	NaN	NaN	4.7	110.3	10140133	10140132	10140127	7	23.1	18.8	10140123
14	22.6	NaN	NaN	20.6	NaN	NaN	85.6	10140135	10140136	10140124	6	17.2	18	10140107
14	NaN	NaN	6.8	NaN	NaN	6.8	108.2	10140137	10140138	10140135	7	22.6	17.2	10140124
14	NaN	NaN	8.8	NaN	NaN	8.8	106.2	10140140	10140141	10140136	7	20.6	17.2	10140124
15	24.6	NaN	NaN	23.9	NaN	NaN	4.4	101502	101503	101501	2	NaN	NaN	1015000
15	24.9	NaN	NaN	24.1	NaN	NaN	28.3	101507	101508	101503	3	23.9	NaN	101501
15	30.6	NaN	NaN	31.3	NaN	NaN	53.2	1015010	1015011	101507	4	24.9	23.9	101503
15	NaN	NaN	31.2	NaN	NaN	31.2	83.8	1015013	1015014	1015010	5	30.6	24.9	101507
15	29.7	NaN	NaN	30	NaN	NaN	84.5	1015020	1015021	1015011	5	31.3	24.9	101507
15	NaN	NaN	0.8	NaN	NaN	0.8	114.2	1015023	1015024	1015020	6	29.7	31.3	1015011
15	NaN	NaN	0.5	NaN	NaN	0.5	114.5	1015026	1015027	1015021	6	30	31.3	1015011
15	31.9	NaN	NaN	29.3	NaN	NaN	52.4	1015029	1015030	101508	4	24.1	23.9	101503
15	NaN	NaN	30.7	NaN	NaN	30.7	84.3	1015032	1015033	1015029	5	31.9	24.1	101508
15	NaN	NaN	33.3	33.2	NaN	NaN	81.7	1015038	1015037	1015030	5	29.3	24.1	101508
15	NaN	NaN	0.1	NaN	NaN	0.1	114.9	1015041	1015042	1015037	6	33.2	29.3	1015030
15	26.9	NaN	NaN	24.7	NaN	NaN	29	101504	101505	101502	3	24.6	NaN	101501
15	29.1	NaN	NaN	32.1	NaN	NaN	55.9	1015044	1015045	101504	4	26.9	24.6	101502
15	29.9	NaN	NaN	NaN	NaN	30	85	1015047	1015048	1015044	5	29.1	26.9	101504
15	NaN	NaN	0.1	NaN	NaN	0.1	114.9	1015050	1015051	1015047	6	29.9	29.1	1015044
15	NaN	NaN	27	NaN	NaN	27	88	1015055	1015056	1015045	5	32.1	26.9	101504
15	28.8	NaN	NaN	30	NaN	NaN	53.7	1015060	1015061	101505	4	24.7	24.6	101502
15	30.7	NaN	NaN	27	NaN	NaN	82.5	1015063	1015064	1015060	5	28.8	24.7	101505
15	NaN	NaN	1.8	NaN	NaN	1.8	113.2	1015066	1015067	1015063	6	30.7	28.8	1015060
15	NaN	NaN	5.5	NaN	NaN	5.5	109.5	1015069	1015070	1015064	6	27	28.8	1015060
15	29.3	NaN	NaN	NaN	NaN	31.3	83.7	1015072	1015073	1015061	5	30	24.7	101505
15	NaN	NaN	2	NaN	NaN	2	113	1015074	1015075	1015072	6	29.3	30	1015061
16	29.1	NaN	NaN	29	NaN	NaN	9.4	101602	101603	101601	2	NaN	NaN	1016000
16	28.8	NaN	NaN	28.3	NaN	NaN	38.5	101605	101606	101602	3	29.1	NaN	101601
16	23.7	NaN	NaN	22.4	NaN	NaN	67.3	1016011	1016010	101605	4	28.8	29.1	101602
16	20	NaN	NaN	21.4	NaN	NaN	91	1016014	1016015	1016011	5	23.7	28.8	101605
16	NaN	NaN	4	NaN	NaN	4	111	1016016	1016017	1016014	6	20	23.7	1016011
16	NaN	NaN	2.6	NaN	NaN	2.6	112.4	1016021	1016022	1016015	6	21.4	23.7	1016011
16	24.6	NaN	NaN	23.9	NaN	NaN	89.7	1016024	1016025	1016010	5	22.4	28.8	101605
16	NaN	NaN	0.7	NaN	NaN	0.7	114.3	1016026	1016027	1016024	6	24.6	22.4	1016010
16	NaN	NaN	1.4	NaN	NaN	1.4	113.6	1016029	1016030	1016025	6	23.9	22.4	1016010
16	24.3	NaN	NaN	27.5	NaN	NaN	66.8	1016032	1016033	101606	4	28.3	29.1	101602
16	21.9	NaN	NaN	23.6	NaN	NaN	91.1	1016035	1016036	1016032	5	24.3	28.3	101606
16	NaN	NaN	2	NaN	NaN	2	113	1016038	1016039	1016035	6	21.9	24.3	1016032
16	NaN	NaN	0.3	NaN	NaN	0.3	114.7	1016041	1016042	1016036	6	23.6	24.3	1016032
16	NaN	NaN	20.7	NaN	NaN	20.7	94.3	1016044	1016045	1016033	5	27.5	28.3	101606
16	26.5	NaN	NaN	25.9	NaN	NaN	38.4	101608	101609	101603	3	29	NaN	101601
16	28.8	NaN	NaN	25.4	NaN	NaN	64.9	1016049	1016050	101608	4	26.5	29	101603
16	NaN	NaN	21.3	NaN	NaN	21.3	93.7	1016052	1016053	1016049	5	28.8	26.5	101608
16	23.4	NaN	NaN	21.8	NaN	NaN	90.3	1016059	1016060	1016050	5	25.4	26.5	101608
16	NaN	NaN	1.3	NaN	NaN	1.3	113.7	1016061	1016062	1016059	6	23.4	25.4	1016050
16	NaN	NaN	2.9	NaN	NaN	2.9	112.1	1016064	1016065	1016060	6	21.8	25.4	1016050
16	34.4	NaN	NaN	30.1	NaN	NaN	64.3	1016067	1016068	101609	4	25.9	29	101603
16	NaN	NaN	16.3	NaN	NaN	16.3	98.7	1016070	1016071	1016067	5	34.4	25.9	101609
16	NaN	NaN	20.6	NaN	NaN	20.6	94.4	1016075	1016076	1016068	5	30.1	25.9	101609
17	22.4	NaN	NaN	23.1	NaN	NaN	3.7	101702	101703	101701	2	NaN	NaN	1017000
17	21.8	NaN	NaN	19.1	NaN	NaN	26.1	101705	101706	101702	3	22.4	NaN	101701
17	24.8	NaN	NaN	23.7	NaN	NaN	47.9	1017011	1017012	101705	4	21.8	22.4	101702
17	27.4	NaN	NaN	25.7	NaN	NaN	72.7	1017014	1017015	1017011	5	24.8	21.8	101705
17	NaN	NaN	14.9	NaN	NaN	14.9	100.1	1017017	1017018	1017014	6	27.4	24.8	1017011
17	22.4	NaN	NaN	24.8	NaN	NaN	45.2	1017021	1017022	101706	4	19.1	22.4	101702
17	21.7	NaN	NaN	21.5	NaN	NaN	67.6	1017024	1017025	1017021	5	22.4	19.1	101706
17	NaN	NaN	25.7	NaN	NaN	25.2	89.3	1017027	1017028	1017024	6	21.7	22.4	1017021
17	NaN	NaN	5.4	24.9	NaN	NaN	89.1	1017032	1017033	1017025	6	21.5	22.4	1017021
17	NaN	NaN	1	NaN	NaN	1	114	1017036	1017037	1017033	7	24.9	21.5	1017025
17	19.9	NaN	NaN	23.9	NaN	NaN	70	1017041	1017042	1017022	5	24.8	19.1	101706
17	24.5	NaN	NaN	24.9	NaN	NaN	89.9	1017044	1017045	1017041	6	19.9	24.8	1017022
17	NaN	NaN	0.6	NaN	NaN	0.6	114.4	1017046	1017047	1017044	7	24.5	19.9	1017041
17	NaN	NaN	0.2	NaN	NaN	0.2	114.8	1017051	1017052	1017045	7	24.9	19.9	1017041
17	NaN	NaN	21.1	NaN	NaN	21.1	93.9	1017054	1017055	1017042	6	23.9	24.8	1017022
17	NaN	NaN	16.6	NaN	NaN	16.6	98.4	1017059	1017060	1017015	6	25.7	24.8	1017011
17	23.2	NaN	NaN	NaN	NaN	7	71.6	1017063	1017064	1017012	5	23.7	21.8	101705
17	NaN	NaN	5.2	NaN	NaN	15.9	94.8	1017066	1017067	1017063	6	23.2	23.7	1017012
17	22.3	NaN	NaN	24.7	NaN	NaN	26.8	101708	101709	101703	3	23.1	NaN	101701
17	24.3	NaN	NaN	27.6	NaN	NaN	49.1	1017072	1017073	101708	4	22.3	23.1	101703
17	21.8	NaN	NaN	20.7	NaN	NaN	73.4	1017076	1017075	1017072	5	24.3	22.3	101708
17	NaN	NaN	19.8	NaN	NaN	19.8	95.2	1017077	1017078	1017076	6	21.8	24.3	1017072
17	NaN	NaN	20.9	NaN	NaN	20.9	94.1	1017082	1017083	1017075	6	20.7	24.3	1017072
17	22	NaN	NaN	22.8	NaN	NaN	76.7	1017087	1017088	1017073	5	27.6	22.3	101708
17	NaN	NaN	4.9	NaN	NaN	12.9	98.7	1017089	1017090	1017087	6	22	27.6	1017073
17	NaN	NaN	15.5	NaN	NaN	15.5	99.5	1017093	1017094	1017088	6	22.8	27.6	1017073
17	23.6	NaN	NaN	25.5	NaN	NaN	51.5	1017099	10170100	101709	4	24.7	23.1	101703
17	25.3	NaN	NaN	25.3	NaN	NaN	75.1	10170102	10170103	1017099	5	23.6	24.7	101709
17	NaN	NaN	14.6	NaN	NaN	14.6	100.4	10170105	10170106	10170102	6	25.3	23.6	1017099
17	NaN	NaN	14.6	NaN	NaN	14.6	100.4	10170108	10170109	10170103	6	25.3	23.6	1017099
17	26.6	NaN	NaN	24.1	NaN	NaN	77	10170111	10170112	10170100	5	25.5	24.7	101709
17	NaN	NaN	11.4	NaN	NaN	11.4	103.6	10170114	10170115	10170111	6	26.6	25.5	10170100
17	NaN	NaN	13.9	NaN	NaN	13.9	101.1	10170117	10170118	10170112	6	24.1	25.5	10170100
18	26.6	NaN	NaN	26.1	NaN	NaN	5.9	101802	101803	101801	2	NaN	NaN	1018000
18	21.7	NaN	NaN	23.7	NaN	NaN	32.5	101805	101806	101802	3	26.6	NaN	101801
18	19.5	NaN	NaN	22.3	NaN	NaN	54.2	1018010	1018011	101805	4	21.7	26.6	101802
18	20.6	NaN	NaN	24.7	NaN	NaN	73.7	1018014	1018015	1018010	5	19.5	21.7	101805
18	NaN	NaN	1.6	NaN	NaN	20.7	94.3	1018017	1018018	1018014	6	20.6	19.5	1018010
18	NaN	NaN	16.6	NaN	NaN	16.6	98.4	1018022	1018023	1018015	6	24.7	19.5	1018010
18	19.5	NaN	NaN	29.4	NaN	NaN	76.5	1018027	1018028	1018011	5	22.3	21.7	101805
18	NaN	NaN	0.2	NaN	NaN	0.2	96	1018030	1018031	1018027	6	19.5	22.3	1018011
18	NaN	NaN	9.1	NaN	NaN	9.1	105.9	1018033	1018034	1018028	6	29.4	22.3	1018011
18	22.1	NaN	NaN	23	NaN	NaN	56.2	1018036	1018037	101806	4	23.7	26.6	101802
18	26.1	NaN	NaN	29.6	NaN	NaN	78.3	1018039	1018040	1018036	5	22.1	23.7	101806
18	NaN	NaN	10.6	NaN	NaN	10.6	104.4	1018042	1018043	1018039	6	26.1	22.1	1018036
18	NaN	NaN	7.1	NaN	NaN	7.1	107.9	1018045	1018046	1018040	6	29.6	22.1	1018036
18	25.9	NaN	NaN	23.5	NaN	NaN	79.2	1018048	1018049	1018037	5	23	23.7	101806
18	NaN	NaN	9.9	NaN	NaN	9.9	105.1	1018051	1018052	1018048	6	25.9	23	1018037
18	NaN	NaN	12.3	NaN	NaN	12.3	102.7	1018054	1018055	1018049	6	23.5	23	1018037
18	24.1	NaN	NaN	23.4	NaN	NaN	32	101808	101809	101803	3	26.1	NaN	101801
18	25.5	NaN	NaN	26.3	NaN	NaN	56.1	1018057	1018058	101808	4	24.1	26.1	101803
18	27.9	NaN	NaN	27.3	NaN	NaN	81.6	1018060	1018061	1018057	5	25.5	24.1	101808
18	NaN	NaN	5.5	NaN	NaN	5.5	109.5	1018063	1018064	1018060	6	27.9	25.5	1018057
18	NaN	NaN	6.1	NaN	NaN	6.1	108.9	1018066	1018067	1018061	6	27.3	25.5	1018057
18	23	NaN	NaN	23.5	NaN	NaN	82.4	1018069	1018070	1018058	5	26.3	24.1	101808
18	NaN	NaN	9.6	NaN	NaN	9.6	105.4	1018072	1018073	1018069	6	23	26.3	1018058
18	NaN	NaN	9.1	NaN	NaN	9.1	105.9	1018075	1018076	1018070	6	23.5	26.3	1018058
18	25.1	NaN	NaN	29.7	NaN	NaN	55.4	1018078	1018079	101809	4	23.4	26.1	101803
18	NaN	NaN	34.5	NaN	26.7	NaN	80.5	1018081	1018082	1018078	5	25.1	23.4	101809
18	NaN	NaN	29.9	NaN	NaN	29.9	85.1	1018087	1018088	1018079	5	29.7	23.4	101809
19	21.4	NaN	NaN	NaN	NaN	11.6	3.7	101902	101903	101901	2	NaN	NaN	1019000
19	20.6	NaN	NaN	22.8	NaN	NaN	25.1	101905	101906	101902	3	21.4	NaN	101901
19	20.4	NaN	NaN	20.8	NaN	NaN	45.7	101909	1019010	101905	4	20.6	21.4	101902
19	21.7	NaN	NaN	19.4	NaN	NaN	66.1	1019012	1019013	101909	5	20.4	20.6	101905
19	24.6	NaN	NaN	22.5	NaN	NaN	87.8	1019015	1019016	1019012	6	21.7	20.4	101909
19	NaN	NaN	2.6	NaN	NaN	2.6	112.4	1019018	1019019	1019015	7	24.6	21.7	1019012
19	NaN	NaN	4.7	NaN	NaN	4.7	110.3	1019021	1019022	1019016	7	22.5	21.7	1019012
19	23.4	NaN	NaN	24.2	NaN	NaN	85.5	1019024	1019025	1019013	6	19.4	20.4	101909
19	NaN	NaN	6.1	NaN	NaN	6.1	108.9	1019027	1019028	1019024	7	23.4	19.4	1019013
19	NaN	NaN	5.3	NaN	NaN	5.3	109.7	1019030	1019031	1019025	7	24.2	19.4	1019013
19	24	NaN	NaN	28	NaN	NaN	66.5	1019033	1019034	1019010	5	20.8	20.6	101905
19	NaN	NaN	24.5	23	NaN	NaN	90.5	1019036	1019037	1019033	6	24	20.8	1019010
19	NaN	NaN	1.5	NaN	NaN	1.5	113.5	1019040	1019041	1019037	7	23	24	1019033
19	NaN	NaN	6.4	NaN	NaN	20.5	94.5	1019043	1019044	1019034	6	28	20.8	1019010
19	23.2	NaN	NaN	23.3	NaN	NaN	47.9	1019049	1019050	101906	4	22.8	21.4	101902
19	21.7	NaN	NaN	22.1	NaN	NaN	71.1	1019052	1019053	1019049	5	23.2	22.8	101906
19	NaN	NaN	22.2	NaN	NaN	22.2	92.8	1019055	1019056	1019052	6	21.7	23.2	1019049
19	NaN	NaN	21.8	NaN	NaN	21.8	93.2	1019060	1019061	1019053	6	22.1	23.2	1019049
19	20.8	NaN	NaN	23.1	NaN	NaN	71.2	1019065	1019066	1019050	5	23.3	22.8	101906
19	NaN	NaN	23	NaN	NaN	23	92	1019068	1019069	1019065	6	20.8	23.3	1019050
19	NaN	NaN	20.7	NaN	NaN	20.7	94.3	1019072	1019073	1019066	6	23.1	23.3	1019050

## Sheet: rap2
Lineage ID	Sibling 1 cycle length	Sibling 1 time to death	Sibling 1 time to cell loss	Sibling 2 cycle length	Sibling 2 time to death	Sibling 2 time to cell loss	Birth time	Sibling 1 ID	Sibling 2 ID	Mother ID	Generation	Mother cycle length	Grandmother cycle length	Grandmother ID
1	16.2	NaN	NaN	17	NaN	NaN	9.6	10102	10103	10101	2	NaN	NaN	101000
1	20	NaN	NaN	18.6	NaN	NaN	25.8	10104	10105	10102	3	16.2	NaN	10101
1	21	NaN	NaN	22.8	NaN	NaN	45.8	10106	10107	10104	4	20	16.2	10102
1	48.8	NaN	NaN	21	NaN	NaN	66.8	10108	10109	10106	5	21	20	10104
1	NaN	NaN	1.4	NaN	NaN	1.4	115.6	101010	101011	10108	6	48.8	21	10106
1	18.4	NaN	NaN	20.4	NaN	NaN	26.6	101012	101013	10103	3	17	NaN	10101
1	22.8	NaN	NaN	18.4	NaN	NaN	45	101014	101015	101012	4	18.4	17	10103
1	20.2	NaN	NaN	21.6	NaN	NaN	67.8	101016	101017	101014	5	22.8	18.4	101012
1	NaN	NaN	29	NaN	NaN	29	88	101018	101019	101016	6	20.2	22.8	101014
1	24.4	NaN	NaN	24.8	NaN	NaN	44.4	101021	101022	10105	4	18.6	16.2	10102
1	NaN	NaN	48.2	NaN	NaN	48.2	68.8	101023	101024	101021	5	24.4	18.6	10105
1	17.8	NaN	NaN	17	NaN	NaN	68.6	101026	101027	10107	5	22.8	20	10104
1	27.6	NaN	NaN	27	NaN	NaN	86.4	101028	101029	101026	6	17.8	22.8	10107
1	NaN	NaN	3	NaN	NaN	3	114	101030	101031	101028	7	27.6	17.8	101026
1	NaN	NaN	29.2	NaN	NaN	29.2	87.8	101032	101033	10109	6	21	21	10106
1	23	NaN	NaN	21.6	NaN	NaN	47	101035	101036	101013	4	20.4	17	10103
1	19.8	NaN	NaN	22.2	NaN	NaN	70	101037	101038	101035	5	23	20.4	101013
1	NaN	NaN	13.8	NaN	NaN	27.2	89.8	101039	101040	101037	6	19.8	23	101035
1	17.2	NaN	NaN	17.8	NaN	NaN	63.4	101042	101043	101015	5	18.4	18.4	101012
1	28.2	NaN	NaN	28	NaN	NaN	80.6	101044	101045	101042	6	17.2	18.4	101015
1	NaN	NaN	8.2	NaN	NaN	8.2	108.8	101046	101047	101044	7	28.2	17.2	101042
1	NaN	NaN	27.6	NaN	NaN	27.6	89.4	101049	101050	101017	6	21.6	22.8	101014
1	29.2	NaN	NaN	27	NaN	NaN	69.2	101054	101055	101022	5	24.8	18.6	10105
1	NaN	NaN	18.6	NaN	NaN	18.6	98.4	101056	101057	101054	6	29.2	24.8	101022
1	NaN	NaN	31.4	31.2	NaN	NaN	85.6	101059	101060	101027	6	17	22.8	10107
1	NaN	NaN	0.2	NaN	NaN	0.2	116.8	101062	101063	101060	7	31.2	17	101027
1	NaN	NaN	3.6	NaN	NaN	3.6	113.4	101064	101065	101029	7	27	17.8	101026
1	NaN	NaN	20.8	NaN	NaN	20.8	96.2	101067	101068	101055	6	27	24.8	101022
1	NaN	NaN	24.8	NaN	NaN	24.8	92.2	101070	101071	101038	6	22.2	23	101035
1	17.8	NaN	NaN	18.4	NaN	NaN	68.6	101074	101075	101036	5	21.6	20.4	101013
1	NaN	NaN	30.6	NaN	NaN	30.6	86.4	101076	101077	101074	6	17.8	21.6	101036
1	NaN	NaN	8.4	NaN	NaN	8.4	108.6	101082	101083	101045	7	28	17.2	101042
1	30	NaN	NaN	21.4	NaN	NaN	81.2	101084	101085	101043	6	17.8	18.4	101015
1	NaN	NaN	5.8	NaN	NaN	5.8	111.2	101086	101087	101084	7	30	17.8	101043
1	NaN	NaN	14.4	NaN	NaN	14.4	102.6	101088	101089	101085	7	21.4	17.8	101043
1	NaN	NaN	30	NaN	NaN	30	87	101079	101080	101075	6	18.4	21.6	101036
2	21.2	NaN	NaN	17	NaN	NaN	7.2	10202	10203	10201	2	NaN	NaN	102000
2	20.4	NaN	NaN	20	NaN	NaN	28.4	10204	10205	10202	3	21.2	NaN	10201
2	21.6	NaN	NaN	22	NaN	NaN	48.8	10206	10207	10204	4	20.4	21.2	10202
2	19.8	NaN	NaN	20.8	NaN	NaN	70.4	10208	10209	10206	5	21.6	20.4	10204
2	NaN	NaN	26.8	NaN	NaN	26.8	90.2	102010	102011	10208	6	19.8	21.6	10206
2	18.4	NaN	NaN	22.6	NaN	NaN	48.4	102013	102014	10205	4	20	21.2	10202
2	18.8	NaN	NaN	19.8	NaN	NaN	66.8	102015	102016	102013	5	18.4	20	10205
2	NaN	NaN	31.4	NaN	NaN	31.4	85.6	102017	102018	102015	6	18.8	18.4	102013
2	21.2	NaN	NaN	17.8	NaN	NaN	24.2	102020	102021	10203	3	17	NaN	10201
2	NaN	NaN	11	25.4	NaN	NaN	45.4	102022	102023	102020	4	21.2	17	10203
2	25.2	NaN	NaN	26.4	NaN	NaN	70.8	102025	102026	102023	5	25.4	21.2	102020
2	NaN	NaN	21	NaN	NaN	21	96	102027	102028	102025	6	25.2	25.4	102023
2	NaN	NaN	19.8	NaN	NaN	19.8	97.2	102033	102034	102026	6	26.4	25.4	102023
2	NaN	NaN	25.8	NaN	NaN	25.8	91.2	102036	102037	10209	6	20.8	21.6	10206
2	22.4	NaN	NaN	23.4	NaN	NaN	71	102041	102042	102014	5	22.6	20	10205
2	NaN	NaN	23.6	NaN	NaN	23.6	93.4	102043	102044	102041	6	22.4	22.6	102014
2	NaN	NaN	22.6	NaN	NaN	22.6	94.4	102046	102047	102042	6	23.4	22.6	102014
2	18.2	NaN	NaN	20.4	NaN	NaN	70.8	102031	102032	10207	5	22	20.4	10204
2	24.2	NaN	NaN	21.8	NaN	NaN	89	102050	102051	102031	6	18.2	22	10207
2	NaN	NaN	3.8	NaN	NaN	3.8	113.2	102052	102053	102050	7	24.2	18.2	102031
2	NaN	NaN	6.2	NaN	NaN	6.2	110.8	102054	102055	102051	7	21.8	18.2	102031
2	NaN	NaN	30.4	NaN	NaN	30.4	86.6	102056	102057	102016	6	19.8	18.4	102013
2	19.4	NaN	NaN	NaN	NaN	18.8	42	102061	102062	102021	4	17.8	17	10203
2	18.4	NaN	NaN	17.8	NaN	NaN	61.4	102063	102064	102061	5	19.4	17.8	102021
2	33.8	NaN	NaN	33.6	NaN	NaN	79.8	102065	102066	102063	6	18.4	19.4	102061
2	NaN	NaN	3.4	NaN	NaN	3.4	113.6	102067	102068	102065	7	33.8	18.4	102063
2	25.4	NaN	NaN	NaN	NaN	25.8	91.2	102069	102070	102032	6	20.4	22	10207
2	NaN	NaN	0.4	NaN	NaN	0.4	116.6	102071	102072	102069	7	25.4	20.4	102032
2	33.2	NaN	NaN	26	NaN	NaN	79.2	102075	102076	102064	6	17.8	19.4	102061
2	NaN	NaN	4.6	NaN	NaN	4.6	112.4	102077	102078	102075	7	33.2	17.8	102064
2	NaN	NaN	11.8	NaN	NaN	11.8	105.2	102079	102080	102076	7	26	17.8	102064
2	NaN	NaN	3.6	NaN	NaN	3.6	113.4	102081	102082	102066	7	33.6	18.4	102063
3	20	NaN	NaN	20.8	NaN	NaN	15.6	10302	10303	10301	2	NaN	NaN	103000
3	18.4	NaN	NaN	20.2	NaN	NaN	35.6	10304	10305	10302	3	20	NaN	10301
3	21.6	NaN	NaN	20.8	NaN	NaN	54	10306	10307	10304	4	18.4	20	10302
3	NaN	NaN	41.4	NaN	NaN	41.4	75.6	10308	10309	10306	5	21.6	18.4	10304
3	20	NaN	NaN	18.4	NaN	NaN	36.4	103012	103013	10303	3	20.8	NaN	10301
3	NaN	NaN	11.4	20.4	NaN	NaN	56.4	103014	103015	103012	4	20	20.8	10303
3	19.8	NaN	NaN	19.6	NaN	NaN	55.8	103019	103020	10305	4	20.2	20	10302
3	18.2	NaN	NaN	18.8	NaN	NaN	75.6	103021	103022	103019	5	19.8	20.2	10305
3	NaN	NaN	23.2	NaN	NaN	23.2	93.8	103023	103024	103021	6	18.2	19.8	103019
3	18.6	NaN	NaN	18.8	NaN	NaN	74.8	103026	103027	10307	5	20.8	18.4	10304
3	NaN	NaN	23.6	NaN	NaN	23.6	93.4	103028	103029	103026	6	18.6	20.8	10307
3	26.6	NaN	NaN	17.6	NaN	NaN	54.8	103031	103032	103013	4	18.4	20.8	10303
3	NaN	19.2	NaN	NaN	NaN	35.6	81.4	103033	103034	103031	5	26.6	18.4	103013
3	16.8	NaN	NaN	17.4	NaN	NaN	76.8	103018	103017	103015	5	20.4	20	103012
3	NaN	NaN	15.6	NaN	NaN	23.4	93.6	103036	103037	103018	6	16.8	20.4	103015
3	19.6	NaN	NaN	19.2	NaN	NaN	75.4	103040	103041	103020	5	19.6	20.2	10305
3	NaN	NaN	22	NaN	NaN	22	95	103042	103043	103040	6	19.6	19.6	103020
3	NaN	NaN	22.6	NaN	NaN	22.6	94.4	103045	103046	103022	6	18.8	19.8	103019
3	NaN	NaN	23.4	NaN	NaN	23.4	93.6	103049	103050	103027	6	18.8	20.8	10307
3	16.6	NaN	NaN	16.8	NaN	NaN	72.4	103054	103055	103032	5	17.6	18.4	103013
3	17.6	NaN	NaN	17.8	NaN	NaN	89	103056	103057	103054	6	16.6	17.6	103032
3	NaN	NaN	22.4	NaN	NaN	22.4	94.6	103064	103065	103041	6	19.2	19.6	103020
3	24	NaN	NaN	20.2	NaN	NaN	89.2	103069	103070	103055	6	16.8	17.6	103032
3	NaN	NaN	3.8	NaN	NaN	3.8	113.2	103071	103072	103069	7	24	16.8	103055
3	NaN	NaN	7.6	NaN	NaN	7.6	109.4	103073	103074	103070	7	20.2	16.8	103055
3	NaN	NaN	10.4	NaN	NaN	10.4	106.6	103059	103058	103056	7	17.6	16.6	103054
3	NaN	NaN	10.2	NaN	NaN	10.2	106.8	103060	103061	103057	7	17.8	16.6	103054
3	NaN	NaN	22.8	NaN	NaN	22.8	94.2	103075	103076	103017	6	17.4	20.4	103015
4	16.4	NaN	NaN	18.4	NaN	NaN	12.2	10402	10403	10401	2	NaN	NaN	104000
4	17.4	NaN	NaN	17.2	NaN	NaN	28.6	10404	10405	10402	3	16.4	NaN	10401
4	18.4	NaN	NaN	17.8	NaN	NaN	46	10406	10407	10404	4	17.4	16.4	10402
4	NaN	NaN	1.6	20.4	NaN	NaN	64.4	10408	10409	10406	5	18.4	17.4	10404
4	14	NaN	NaN	14.4	NaN	NaN	30.6	104013	104014	10403	3	18.4	NaN	10401
4	18.6	NaN	NaN	18.6	NaN	NaN	44.6	104015	104016	104013	4	14	18.4	10403
4	14.6	NaN	NaN	13.6	NaN	NaN	63.2	104017	104018	104015	5	18.6	14	104013
4	22.6	NaN	NaN	19.8	NaN	NaN	77.8	104019	104020	104017	6	14.6	18.6	104015
4	NaN	NaN	16.6	NaN	NaN	16.6	100.4	104021	104022	104019	7	22.6	14.6	104017
4	20.6	NaN	NaN	16.8	NaN	NaN	45.8	104024	104025	10405	4	17.2	16.4	10402
4	20	NaN	NaN	18	NaN	NaN	66.4	104026	104027	104024	5	20.6	17.2	10405
4	19	NaN	NaN	19	NaN	NaN	86.4	104028	104029	104026	6	20	20.6	104024
4	NaN	NaN	11.6	NaN	NaN	11.6	105.4	104030	104031	104028	7	19	20	104026
4	18	NaN	NaN	19.8	NaN	NaN	63.8	104032	104033	10407	5	17.8	17.4	10404
4	23.8	NaN	NaN	NaN	NaN	16.6	81.8	104034	104035	104032	6	18	17.8	10407
4	NaN	NaN	11.4	NaN	NaN	11.4	105.6	104036	104037	104034	7	23.8	18	104032
4	NaN	NaN	19.6	27	NaN	NaN	84.8	104011	104012	10409	6	20.4	18.4	10406
4	NaN	NaN	5.2	NaN	NaN	5.2	111.8	104039	104040	104012	7	27	20.4	10409
4	18.6	NaN	NaN	17.6	NaN	NaN	45	104041	104042	104014	4	14.4	18.4	10403
4	19.4	NaN	NaN	20.6	NaN	NaN	63.6	104043	104044	104041	5	18.6	14.4	104014
4	26	NaN	NaN	23.8	NaN	NaN	83	104045	104046	104043	6	19.4	18.6	104041
4	NaN	NaN	8	NaN	NaN	8	109	104047	104048	104045	7	26	19.4	104043
4	16.4	NaN	NaN	14.4	NaN	NaN	63.2	104049	104050	104016	5	18.6	14	104013
4	27.8	NaN	NaN	24.2	NaN	NaN	79.6	104051	104052	104049	6	16.4	18.6	104016
4	NaN	NaN	9.6	NaN	NaN	9.6	107.4	104053	104054	104051	7	27.8	16.4	104049
4	26.4	NaN	NaN	31.2	NaN	NaN	76.8	104055	104056	104018	6	13.6	18.6	104015
4	NaN	NaN	13.8	NaN	NaN	13.8	103.2	104057	104058	104055	7	26.4	13.6	104018
4	NaN	NaN	19.4	NaN	NaN	19.4	97.6	104059	104060	104020	7	19.8	14.6	104017
4	20.2	NaN	NaN	22.8	NaN	NaN	84.4	104064	104065	104027	6	18	20.6	104024
4	NaN	NaN	12.4	NaN	NaN	12.4	104.6	104066	104067	104064	7	20.2	18	104027
4	NaN	NaN	9.8	NaN	NaN	9.8	107.2	104068	104069	104065	7	22.8	18	104027
4	NaN	NaN	9	NaN	NaN	9	108	104070	104071	104056	7	31.2	13.6	104018
4	18	NaN	NaN	18.8	NaN	NaN	77.6	104072	104073	104050	6	14.4	18.6	104016
4	NaN	NaN	3	NaN	NaN	2.8	95.6	104074	104075	104072	7	18	14.4	104050
4	NaN	NaN	20.6	NaN	NaN	20.6	96.4	104078	104079	104073	7	18.8	14.4	104050
4	NaN	NaN	13.2	NaN	NaN	13.2	103.8	104082	104083	104052	7	24.2	16.4	104049
4	18	NaN	NaN	18.4	NaN	NaN	62.6	104084	104085	104025	5	16.8	17.2	10405
4	16.4	NaN	NaN	17	NaN	NaN	80.6	104086	104087	104084	6	18	16.8	104025
4	NaN	NaN	20	NaN	NaN	20	97	104088	104089	104086	7	16.4	18	104084
4	NaN	NaN	11.6	NaN	NaN	11.6	105.4	104091	104092	104029	7	19	20	104026
4	22.6	NaN	NaN	NaN	NaN	5.4	83.6	104093	104094	104033	6	19.8	17.8	10407
4	NaN	NaN	10.8	NaN	NaN	10.8	106.2	104095	104096	104093	7	22.6	19.8	104033
4	24.6	NaN	NaN	33.4	NaN	NaN	81	104099	1040100	104085	6	18.4	16.8	104025
4	NaN	NaN	11.4	NaN	NaN	11.4	105.6	1040101	1040102	104099	7	24.6	18.4	104085
4	NaN	NaN	2.6	NaN	NaN	2.6	114.4	1040103	1040104	1040100	7	33.4	18.4	104085
4	16.8	NaN	NaN	14.8	NaN	NaN	62.6	1040105	1040106	104042	5	17.6	14.4	104014
4	18.2	NaN	NaN	17.4	NaN	NaN	79.4	1040107	1040108	1040105	6	16.8	17.6	104042
4	NaN	NaN	19.4	NaN	NaN	19.4	97.6	1040109	1040110	1040107	7	18.2	16.8	1040105
4	NaN	NaN	32.8	25.2	NaN	NaN	84.2	1040112	1040113	104044	6	20.6	18.6	104041
4	NaN	NaN	7.6	NaN	NaN	7.6	109.4	1040115	1040116	1040113	7	25.2	20.6	104044
4	NaN	NaN	10.2	NaN	NaN	10.2	106.8	1040117	1040118	104046	7	23.8	19.4	104043
4	NaN	NaN	19.4	NaN	NaN	19.4	97.6	1040119	1040120	104087	7	17	18	104084
4	17.4	NaN	NaN	17	NaN	NaN	77.4	1040124	1040125	1040106	6	14.8	17.6	104042
4	NaN	NaN	22.2	NaN	NaN	22.2	94.8	1040126	1040127	1040124	7	17.4	14.8	1040106
4	19.8	NaN	NaN	20.4	NaN	NaN	94.4	1040130	1040131	1040125	7	17	14.8	1040106
4	NaN	NaN	2.8	NaN	NaN	2.8	114.2	1040132	1040133	1040130	8	19.8	17	1040125
4	20	NaN	NaN	NaN	NaN	20.2	96.8	1040134	1040135	1040108	7	17.4	16.8	1040105
4	NaN	NaN	0.2	NaN	NaN	0.2	116.8	1040136	1040137	1040134	8	20	17.4	1040108
4	NaN	NaN	2.2	NaN	NaN	2.2	114.8	1040141	1040142	1040131	8	20.4	17	1040125
5	18.2	NaN	NaN	17	NaN	NaN	12.6	10502	10503	10501	2	NaN	NaN	105000
5	14.8	NaN	NaN	15.8	NaN	NaN	30.8	10504	10505	10502	3	18.2	NaN	10501
5	23.8	NaN	NaN	17.4	NaN	NaN	45.6	10506	10507	10504	4	14.8	18.2	10502
5	13.4	NaN	NaN	14.2	NaN	NaN	69.4	10508	10509	10506	5	23.8	14.8	10504
5	15.4	NaN	NaN	14	NaN	NaN	82.8	105010	105011	10508	6	13.4	23.8	10506
5	NaN	NaN	0.4	NaN	NaN	0.4	98.2	105012	105013	105010	7	15.4	13.4	10508
5	NaN	NaN	20.2	NaN	NaN	20.2	96.8	105014	105015	105011	7	14	13.4	10508
5	20	NaN	NaN	23	NaN	NaN	83.6	105018	105019	10509	6	14.2	23.8	10506
5	NaN	NaN	13.4	NaN	NaN	13.4	103.6	105020	105021	105018	7	20	14.2	10509
5	NaN	NaN	10.4	NaN	NaN	10.4	106.6	105023	105024	105019	7	23	14.2	10509
5	16.2	NaN	NaN	15.4	NaN	NaN	63	105025	105026	10507	5	17.4	14.8	10504
5	NaN	NaN	8.6	20.4	NaN	NaN	78.4	105029	105030	105026	6	15.4	17.4	10507
5	NaN	NaN	0.8	NaN	NaN	0.8	98.8	105032	105033	105030	7	20.4	15.4	105026
5	NaN	NaN	37.8	37.6	NaN	NaN	79.2	105027	105028	105025	6	16.2	17.4	10507
5	NaN	NaN	0.2	NaN	NaN	0.2	116.8	105035	105036	105028	7	37.6	16.2	105025
5	15.4	NaN	NaN	15.6	NaN	NaN	29.6	105037	105038	10503	3	17	NaN	10501
5	16	NaN	NaN	17.4	NaN	NaN	45.2	105041	105042	105038	4	15.6	17	10503
5	19.8	NaN	NaN	16.8	NaN	NaN	61.2	105043	105044	105041	5	16	15.6	105038
5	26	NaN	NaN	24	NaN	NaN	81	105045	105046	105043	6	19.8	16	105041
5	NaN	NaN	10	NaN	NaN	10	107	105047	105048	105045	7	26	19.8	105043
5	19.2	NaN	NaN	17.2	NaN	NaN	45	105039	105040	105037	4	15.4	17	10503
5	17	NaN	NaN	16	NaN	NaN	64.2	105049	105050	105039	5	19.2	15.4	105037
5	NaN	NaN	35.8	NaN	NaN	35.8	81.2	105051	105052	105049	6	17	19.2	105039
5	17.4	NaN	NaN	15.8	NaN	NaN	62.2	105054	105055	105040	5	17.2	15.4	105037
5	19.4	NaN	NaN	18.6	NaN	NaN	79.6	105056	105057	105054	6	17.4	17.2	105040
5	NaN	NaN	18	NaN	NaN	18	99	105058	105059	105056	7	19.4	17.4	105054
5	15.8	NaN	NaN	16.4	NaN	NaN	46.6	105062	105061	10505	4	15.8	18.2	10502
5	15.6	NaN	NaN	14.2	NaN	NaN	63	105065	105066	105061	5	16.4	15.8	10505
5	16.4	NaN	NaN	14.8	NaN	NaN	78.6	105068	105067	105065	6	15.6	16.4	105061
5	NaN	NaN	22	NaN	NaN	22	95	105069	105070	105068	7	16.4	15.6	105065
5	15.4	NaN	NaN	15.6	NaN	NaN	62.6	105072	105073	105042	5	17.4	15.6	105038
5	26.8	NaN	NaN	38.4	NaN	NaN	78	105074	105075	105072	6	15.4	17.4	105042
5	NaN	NaN	12.2	NaN	NaN	12.2	104.8	105076	105077	105074	7	26.8	15.4	105072
5	28.8	NaN	NaN	NaN	NaN	39	78	105078	105079	105044	6	16.8	16	105041
5	NaN	NaN	10.2	NaN	NaN	10.2	106.8	105080	105081	105078	7	28.8	16.8	105044
5	NaN	NaN	12	NaN	NaN	12	105	105083	105084	105046	7	24	19.8	105043
5	18.2	NaN	NaN	25	NaN	NaN	80.2	105085	105086	105050	6	16	19.2	105039
5	NaN	NaN	18.6	NaN	NaN	18.6	98.4	105087	105088	105085	7	18.2	16	105050
5	NaN	NaN	11.8	NaN	NaN	11.8	105.2	105091	105092	105086	7	25	16	105050
5	NaN	NaN	0.6	NaN	NaN	0.6	116.4	105093	105094	105075	7	38.4	15.4	105072
5	27.4	NaN	NaN	32.6	NaN	NaN	78.2	105095	105096	105073	6	15.6	17.4	105042
5	NaN	NaN	11.4	NaN	NaN	11.4	105.6	105097	105098	105095	7	27.4	15.6	105073
5	NaN	NaN	6.2	NaN	NaN	6.2	110.8	105099	1050100	105096	7	32.6	15.6	105073
5	19.6	NaN	NaN	19	NaN	NaN	78	1050102	1050103	105055	6	15.8	17.2	105040
5	NaN	NaN	19.4	NaN	NaN	19.4	97.6	1050104	1050105	1050102	7	19.6	15.8	105055
5	NaN	NaN	20	NaN	NaN	20	97	1050108	1050109	1050103	7	19	15.8	105055
5	NaN	NaN	18.8	NaN	NaN	18.8	98.2	1050112	1050113	105057	7	18.6	17.4	105054
5	13.4	NaN	NaN	16	NaN	NaN	77.2	1050117	1050118	105066	6	14.2	16.4	105061
5	NaN	NaN	0.4	NaN	NaN	0.4	93.2	1050121	1050122	1050118	7	16	14.2	105066
5	NaN	NaN	26.4	NaN	NaN	26.4	90.6	1050119	1050120	1050117	7	13.4	14.2	105066
5	15	NaN	NaN	15.2	NaN	NaN	62.4	105063	105064	105062	5	15.8	15.8	10505
5	26	NaN	NaN	25	NaN	NaN	77.6	1050127	1050128	105064	6	15.2	15.8	105062
5	NaN	NaN	13.4	NaN	NaN	13.4	103.6	1050129	1050130	1050127	7	26	15.2	105064
5	NaN	NaN	14.4	NaN	NaN	14.4	102.6	1050131	1050132	1050128	7	25	15.2	105064
5	18.4	NaN	NaN	17.4	NaN	NaN	77.4	1050126	1050125	105063	6	15	15.8	105062
5	NaN	NaN	21.2	NaN	NaN	21.2	95.8	1050135	1050136	1050126	7	18.4	15	105063
5	NaN	NaN	22.2	NaN	NaN	22.2	94.8	1050139	1050140	1050125	7	17.4	15	105063
5	19.6	NaN	NaN	20.4	NaN	NaN	93.4	1050144	1050145	105067	7	14.8	15.6	105065
5	NaN	NaN	4	NaN	NaN	4	113	1050146	1050147	1050144	8	19.6	14.8	105067
5	NaN	NaN	3.2	NaN	NaN	3.2	113.8	1050148	1050149	1050145	8	20.4	14.8	105067
6	24	NaN	NaN	18.2	NaN	NaN	12	10602	10603	10601	2	NaN	NaN	106000
6	20.4	NaN	NaN	19	NaN	NaN	36	10604	10605	10602	3	24	NaN	10601
6	17.8	NaN	NaN	22.6	NaN	NaN	56.4	10606	10607	10604	4	20.4	24	10602
6	NaN	NaN	42.8	31.8	NaN	NaN	74.2	10608	10609	10606	5	17.8	20.4	10604
6	17.4	NaN	NaN	19	NaN	NaN	30.2	106011	106012	10603	3	18.2	NaN	10601
6	25	NaN	NaN	24.2	NaN	NaN	47.6	106013	106014	106011	4	17.4	18.2	10603
6	NaN	NaN	12.8	NaN	NaN	14.6	72.6	106015	106016	106013	5	25	17.4	106011
6	22.4	NaN	NaN	22.4	NaN	NaN	55	106018	106019	10605	4	19	24	10602
6	37.8	NaN	NaN	NaN	NaN	39.6	77.4	106022	106023	106018	5	22.4	19	10605
6	NaN	NaN	1.8	NaN	NaN	1.8	115.2	106024	106025	106022	6	37.8	22.4	106018
6	NaN	NaN	8.2	NaN	NaN	39.6	77.4	106020	106021	106019	5	22.4	19	10605
6	NaN	NaN	11	NaN	NaN	11	106	106029	106030	10609	6	31.8	17.8	10606
6	NaN	NaN	38	NaN	NaN	29.8	79	106031	106032	10607	5	22.6	20.4	10604
6	NaN	NaN	45.2	NaN	NaN	45.2	71.8	106035	106036	106014	5	24.2	17.4	106011
6	26	NaN	NaN	27.6	NaN	NaN	49.2	106039	106040	106012	4	19	18.2	10603
6	NaN	NaN	41.8	NaN	NaN	5.4	75.2	106041	106042	106039	5	26	19	106012
6	NaN	NaN	40.2	20.6	NaN	NaN	76.8	106045	106046	106040	5	27.6	19	106012
6	NaN	NaN	19.6	NaN	NaN	19.6	97.4	106048	106049	106046	6	20.6	27.6	106040
7	16.2	NaN	NaN	17.2	NaN	NaN	6.4	10702	10703	10701	2	NaN	NaN	107000
7	NaN	NaN	1.6	NaN	NaN	10	23.6	10706	10707	10703	3	17.2	NaN	10701
7	16.8	NaN	NaN	19	NaN	NaN	22.6	10704	10705	10702	3	16.2	NaN	10701
7	17.8	NaN	NaN	18	NaN	NaN	41.6	107012	107013	10705	4	19	16.2	10702
7	18.4	NaN	NaN	18.8	NaN	NaN	59.6	107016	107017	107013	5	18	19	10705
7	NaN	NaN	11.8	20.6	NaN	NaN	78.4	107020	107021	107017	6	18.8	18	107013
7	NaN	NaN	18	NaN	NaN	18	99	107023	107024	107021	7	20.6	18.8	107017
7	NaN	NaN	2.8	NaN	NaN	2.2	78	107019	107018	107016	6	18.4	18	107013
7	18.4	NaN	NaN	19.6	NaN	NaN	59.4	107015	107014	107012	5	17.8	19	10705
7	22	NaN	NaN	18.6	NaN	NaN	79	107032	107033	107014	6	19.6	17.8	107012
7	NaN	NaN	16	NaN	NaN	16	101	107034	107035	107032	7	22	19.6	107014
7	NaN	NaN	0.4	NaN	NaN	0.4	97.6	107038	107039	107033	7	18.6	19.6	107014
7	22.6	NaN	NaN	19.6	NaN	NaN	77.8	107030	107031	107015	6	18.4	17.8	107012
7	NaN	NaN	16.6	NaN	NaN	16.6	100.4	107040	107041	107030	7	22.6	18.4	107015
7	NaN	NaN	1	NaN	NaN	1	97.4	107044	107045	107031	7	19.6	18.4	107015
7	16.4	NaN	NaN	16.2	NaN	NaN	39.4	107010	107011	10704	4	16.8	16.2	10702
7	17	NaN	NaN	18.4	NaN	NaN	55.6	107048	107049	107011	5	16.2	16.8	10704
7	17.6	NaN	NaN	18	NaN	NaN	72.6	107050	107051	107048	6	17	16.2	107011
7	20.4	NaN	NaN	21	NaN	NaN	90.2	107052	107053	107050	7	17.6	17	107048
7	NaN	NaN	6.4	NaN	NaN	6.4	110.6	107054	107055	107052	8	20.4	17.6	107050
7	NaN	NaN	5.8	NaN	NaN	5.8	111.2	107056	107057	107053	8	21	17.6	107050
7	23.6	NaN	NaN	19.4	NaN	NaN	90.6	107058	107059	107051	7	18	17	107048
7	NaN	NaN	2.8	NaN	NaN	2.8	114.2	107060	107061	107058	8	23.6	18	107051
7	NaN	NaN	7	NaN	NaN	7	110	107062	107063	107059	8	19.4	18	107051
7	19.2	NaN	NaN	20.8	NaN	NaN	74	107064	107065	107049	6	18.4	16.2	107011
7	NaN	NaN	23.8	NaN	NaN	23.8	93.2	107066	107067	107064	7	19.2	18.4	107049
7	NaN	NaN	22.2	NaN	NaN	22.2	94.8	107070	107071	107065	7	20.8	18.4	107049
7	17.8	NaN	NaN	19.2	NaN	NaN	55.8	107046	107047	107010	5	16.4	16.8	10704
7	19	NaN	NaN	18.6	NaN	NaN	75	107076	107077	107047	6	19.2	16.4	107010
7	NaN	NaN	23	NaN	NaN	23	94	107078	107079	107076	7	19	19.2	107047
7	NaN	NaN	23.4	23.2	NaN	NaN	93.6	107082	107083	107077	7	18.6	19.2	107047
7	NaN	NaN	0.2	NaN	NaN	0.2	116.8	107085	107086	107083	8	23.2	18.6	107077
7	18.8	NaN	NaN	18.4	NaN	NaN	73.6	107074	107075	107046	6	17.8	16.4	107010
7	NaN	NaN	24.6	NaN	NaN	24.6	92.4	107087	107088	107074	7	18.8	17.8	107046
7	NaN	NaN	25	NaN	NaN	25	92	107091	107092	107075	7	18.4	17.8	107046
8	15.2	NaN	NaN	16.4	NaN	NaN	10.4	10802	10803	10801	2	NaN	NaN	108000
8	NaN	NaN	8.2	17.8	NaN	NaN	26.8	10806	10807	10803	3	16.4	NaN	10801
8	16.2	NaN	NaN	17.4	NaN	NaN	25.6	10804	10805	10802	3	15.2	NaN	10801
8	20.4	NaN	NaN	21.2	NaN	NaN	44.6	108013	108014	10807	4	17.8	16.4	10803
8	17.8	NaN	NaN	17.2	NaN	NaN	65.8	108017	108018	108014	5	21.2	17.8	10807
8	21	NaN	NaN	18.6	NaN	NaN	83.6	108019	108020	108017	6	17.8	21.2	108014
8	NaN	NaN	12.4	NaN	NaN	12.4	104.6	108021	108022	108019	7	21	17.8	108017
8	18	NaN	NaN	18.8	NaN	NaN	41.8	10809	108010	10804	4	16.2	15.2	10802
8	NaN	NaN	2.8	NaN	NaN	4.2	59.8	108024	108025	10809	5	18	16.2	10804
8	NaN	NaN	9.4	17.2	NaN	NaN	60.6	108026	108027	108010	5	18.8	16.2	10804
8	18.6	NaN	NaN	18.6	NaN	NaN	77.8	108031	108032	108027	6	17.2	18.8	108010
8	NaN	NaN	20.6	NaN	NaN	20.6	96.4	108033	108034	108031	7	18.6	17.2	108027
8	NaN	NaN	20.6	NaN	NaN	20.6	96.4	108037	108038	108032	7	18.6	17.2	108027
8	20.4	NaN	NaN	20.2	NaN	NaN	43	108011	108012	10805	4	17.4	15.2	10802
8	NaN	NaN	19.6	20	NaN	NaN	63.4	108041	108042	108011	5	20.4	17.4	10805
8	NaN	NaN	33.6	NaN	NaN	33.6	83.4	108044	108045	108042	6	20	20.4	108011
8	NaN	NaN	16.4	15.4	NaN	NaN	63.2	108048	108049	108012	5	20.2	17.4	10805
8	28.8	NaN	NaN	NaN	NaN	9.6	78.6	108051	108052	108049	6	15.4	20.2	108012
8	NaN	NaN	9.6	NaN	NaN	9.6	107.4	108053	108054	108051	7	28.8	15.4	108049
8	14.4	NaN	NaN	15.6	NaN	NaN	65	108015	108016	108013	5	20.4	17.8	10807
8	16.6	NaN	NaN	16.8	NaN	NaN	79.4	108056	108057	108015	6	14.4	20.4	108013
8	20.8	NaN	NaN	NaN	NaN	21	96	108058	108059	108056	7	16.6	14.4	108015
8	NaN	NaN	0.2	NaN	NaN	0.2	116.8	108061	108062	108058	8	20.8	16.6	108056
8	NaN	NaN	20.8	NaN	NaN	20.8	96.2	108063	108064	108057	7	16.8	14.4	108015
8	22.6	NaN	NaN	17.2	NaN	NaN	80.6	108067	108068	108016	6	15.6	20.4	108013
8	NaN	NaN	13.8	NaN	NaN	13.8	103.2	108069	108070	108067	7	22.6	15.6	108016
8	NaN	NaN	19.2	NaN	NaN	19.2	97.8	108073	108074	108068	7	17.2	15.6	108016
8	18.6	NaN	NaN	18.6	NaN	NaN	83	108077	108078	108018	6	17.2	21.2	108014
8	NaN	NaN	15.4	NaN	NaN	8.4	101.6	108079	108080	108077	7	18.6	17.2	108018
8	NaN	NaN	15.4	NaN	NaN	15.4	101.6	108083	108084	108078	7	18.6	17.2	108018
8	NaN	NaN	14.8	NaN	NaN	14.8	102.2	108086	108087	108020	7	18.6	17.8	108017
9	15	NaN	NaN	15	NaN	NaN	7.8	10902	10903	10901	2	NaN	NaN	109000
9	15.4	NaN	NaN	16.4	NaN	NaN	22.8	10906	10907	10903	3	15	NaN	10901
9	15	NaN	NaN	16.6	NaN	NaN	38.2	10908	10909	10906	4	15.4	15	10903
9	19.2	NaN	NaN	21.4	NaN	NaN	54.8	109012	109013	10909	5	16.6	15.4	10906
9	20.8	NaN	NaN	21.2	NaN	NaN	74	109014	109015	109012	6	19.2	16.6	10909
9	NaN	NaN	22.2	NaN	NaN	22.2	94.8	109016	109017	109014	7	20.8	19.2	109012
9	16.8	NaN	NaN	17.6	NaN	NaN	39.2	109020	109021	10907	4	16.4	15	10903
9	17.8	NaN	NaN	18.2	NaN	NaN	56	109022	109023	109020	5	16.8	16.4	10907
9	34.6	NaN	NaN	37.8	NaN	NaN	73.8	109024	109025	109022	6	17.8	16.8	109020
9	NaN	NaN	8.6	NaN	NaN	8.6	108.4	109026	109027	109024	7	34.6	17.8	109022
9	15.8	NaN	NaN	14	NaN	NaN	22.8	10904	10905	10902	3	15	NaN	10901
9	19.4	NaN	NaN	21	NaN	NaN	38.6	109028	109029	10904	4	15.8	15	10902
9	NaN	NaN	59	NaN	NaN	59	58	109030	109031	109028	5	19.4	15.8	10904
9	16.2	NaN	NaN	16	NaN	NaN	36.8	109033	109034	10905	4	14	15	10902
9	18.2	NaN	NaN	19	NaN	NaN	53	109035	109036	109033	5	16.2	14	10905
9	16.2	NaN	NaN	19.4	NaN	NaN	71.2	109037	109038	109035	6	18.2	16.2	109033
9	NaN	NaN	29.6	23.6	NaN	NaN	87.4	109039	109040	109037	7	16.2	18.2	109035
9	14.8	NaN	NaN	18.8	NaN	NaN	72	109042	109043	109036	6	19	16.2	109033
9	NaN	NaN	30.2	22.4	NaN	NaN	86.8	109044	109045	109042	7	14.8	19	109036
9	19	NaN	NaN	17.2	NaN	NaN	53.2	109010	109011	10908	5	15	15.4	10906
9	NaN	NaN	1.2	NaN	NaN	5.8	72.2	109047	109048	109010	6	19	15	10908
9	19	NaN	NaN	16	NaN	NaN	70.4	109051	109052	109011	6	17.2	15	10908
9	NaN	NaN	27.6	NaN	NaN	27.6	89.4	109053	109054	109051	7	19	17.2	109011
9	20	NaN	NaN	21	NaN	NaN	76.2	109057	109058	109013	6	21.4	16.6	10909
9	NaN	NaN	1.8	NaN	NaN	3.2	96.2	109059	109060	109057	7	20	21.4	109013
9	NaN	NaN	19.8	NaN	NaN	19.8	97.2	109063	109064	109058	7	21	21.4	109013
9	NaN	NaN	21.8	NaN	NaN	21.8	95.2	109067	109068	109015	7	21.2	19.2	109012
9	18.6	NaN	NaN	20	NaN	NaN	56.8	109071	109072	109021	5	17.6	16.4	10907
9	21	NaN	NaN	20.6	NaN	NaN	75.4	109073	109074	109071	6	18.6	17.6	109021
9	NaN	NaN	20.6	NaN	NaN	20.6	96.4	109075	109076	109073	7	21	18.6	109071
9	30.4	NaN	NaN	33.2	NaN	NaN	74.2	109079	109080	109023	6	18.2	16.8	109020
9	NaN	NaN	12.4	NaN	NaN	12.4	104.6	109081	109082	109079	7	30.4	18.2	109023
9	NaN	NaN	5.4	NaN	NaN	5.4	111.6	109083	109084	109025	7	37.8	17.8	109022
9	52.4	NaN	NaN	19.2	NaN	NaN	59.6	109085	109086	109029	5	21	15.8	10904
9	NaN	NaN	5	NaN	NaN	5	112	109087	109088	109085	6	52.4	21	109029
9	17.4	NaN	NaN	17.8	NaN	NaN	52.8	109090	109091	109034	5	16	14	10905
9	21.8	NaN	NaN	22.2	NaN	NaN	70.2	109092	109093	109090	6	17.4	16	109034
9	NaN	NaN	25	NaN	NaN	25	92	109094	109095	109092	7	21.8	17.4	109090
9	NaN	NaN	26.4	23.6	NaN	NaN	90.6	109097	109098	109038	7	19.4	18.2	109035
9	NaN	NaN	6	NaN	NaN	6	111	1090100	1090101	109040	8	23.6	16.2	109037
9	NaN	NaN	26.2	NaN	NaN	26.2	90.8	1090102	1090103	109043	7	18.8	19	109036
9	NaN	NaN	7.8	NaN	NaN	7.8	109.2	1090105	1090106	109045	8	22.4	14.8	109042
9	NaN	NaN	30.6	NaN	NaN	30.6	86.4	1090107	1090108	109052	7	16	17.2	109011
9	16	NaN	NaN	18.8	NaN	NaN	76.8	1090110	1090111	109072	6	20	17.6	109021
9	NaN	NaN	24.2	NaN	NaN	24.2	92.8	1090112	1090113	1090110	7	16	20	109072
9	NaN	NaN	21	NaN	NaN	21	96	1090115	1090116	109074	7	20.6	18.6	109071
9	NaN	NaN	9.6	NaN	NaN	9.6	107.4	1090118	1090119	109080	7	33.2	18.2	109023
9	NaN	NaN	38.2	NaN	NaN	38.2	78.8	1090120	1090121	109086	6	19.2	21	109029
9	21	NaN	NaN	21.2	NaN	NaN	70.6	1090124	1090125	109091	6	17.8	16	109034
9	NaN	NaN	25.4	NaN	NaN	25.4	91.6	1090126	1090127	1090124	7	21	17.8	109091
9	NaN	NaN	24.6	NaN	NaN	24.6	92.4	1090130	1090131	109093	7	22.2	17.4	109090
9	NaN	NaN	2.8	NaN	NaN	2.8	114.2	1090134	1090135	109098	8	23.6	19.4	109038
9	NaN	NaN	21.4	NaN	NaN	21.4	95.6	1090138	1090139	1090111	7	18.8	20	109072
9	NaN	NaN	25.2	NaN	NaN	25.2	91.8	1090144	1090145	1090125	7	21.2	17.8	109091
10	18	NaN	NaN	19.6	NaN	NaN	12.8	101002	101003	101001	2	NaN	NaN	1010000
10	20.4	NaN	NaN	23	NaN	NaN	32.4	101006	101007	101003	3	19.6	NaN	101001
10	24.8	NaN	NaN	21.6	NaN	NaN	52.8	101008	101009	101006	4	20.4	19.6	101003
10	24.2	NaN	NaN	21.2	NaN	NaN	77.6	1010010	1010011	101008	5	24.8	20.4	101006
10	NaN	NaN	15.2	NaN	NaN	15.2	101.8	1010012	1010013	1010010	6	24.2	24.8	101008
10	23.8	NaN	NaN	21.6	NaN	NaN	30.8	101005	101004	101002	3	18	NaN	101001
10	20.8	NaN	NaN	21	NaN	NaN	54.6	1010016	1010017	101005	4	23.8	18	101002
10	26.4	NaN	NaN	25.6	NaN	NaN	75.6	1010020	1010021	1010017	5	21	23.8	101005
10	NaN	NaN	15	NaN	NaN	15	102	1010022	1010023	1010020	6	26.4	21	1010017
10	19.8	NaN	NaN	19.4	NaN	NaN	52.4	1010025	1010026	101004	4	21.6	18	101002
10	NaN	NaN	44.8	25.2	NaN	NaN	72.2	1010027	1010028	1010025	5	19.8	21.6	101004
10	18.4	NaN	NaN	20.2	NaN	NaN	55.4	1010030	1010031	101007	4	23	19.6	101003
10	NaN	NaN	43.2	32.2	NaN	NaN	73.8	1010032	1010033	1010030	5	18.4	23	101007
10	26.8	NaN	NaN	21	NaN	NaN	75.4	1010018	1010019	1010016	5	20.8	23.8	101005
10	NaN	NaN	14.8	NaN	NaN	14.8	102.2	1010035	1010036	1010018	6	26.8	20.8	1010016
10	NaN	NaN	20.6	NaN	NaN	20.6	96.4	1010038	1010039	1010019	6	21	20.8	1010016
10	25.8	NaN	NaN	36.6	NaN	NaN	74.4	1010041	1010042	101009	5	21.6	20.4	101006
10	NaN	NaN	16.8	NaN	NaN	16.8	100.2	1010043	1010044	1010041	6	25.8	21.6	101009
10	NaN	NaN	18.2	NaN	NaN	18.2	98.8	1010047	1010048	1010011	6	21.2	24.8	101008
10	NaN	NaN	15.8	NaN	NaN	15.8	101.2	1010051	1010052	1010021	6	25.6	21	1010017
10	23.4	NaN	NaN	38.4	NaN	NaN	71.8	1010054	1010055	1010026	5	19.4	21.6	101004
10	NaN	NaN	21.8	NaN	NaN	21.8	95.2	1010056	1010057	1010054	6	23.4	19.4	1010026
10	NaN	NaN	6.8	NaN	NaN	6.8	110.2	1010060	1010061	1010055	6	38.4	19.4	1010026
10	NaN	NaN	19.6	NaN	NaN	19.6	97.4	1010062	1010063	1010028	6	25.2	19.8	1010025
10	29.6	NaN	NaN	24.2	NaN	NaN	75.6	1010066	1010067	1010031	5	20.2	23	101007
10	NaN	NaN	11.8	NaN	NaN	11.8	105.2	1010068	1010069	1010066	6	29.6	20.2	1010031
10	NaN	NaN	17.2	NaN	NaN	17.2	99.8	1010070	1010071	1010067	6	24.2	20.2	1010031
10	NaN	NaN	11	NaN	NaN	11	106	1010073	1010074	1010033	6	32.2	18.4	1010030
10	NaN	NaN	6	NaN	NaN	6	111	1010076	1010077	1010042	6	36.6	21.6	101009
11	18.4	NaN	NaN	19.4	NaN	NaN	4.2	101102	101103	101101	2	NaN	NaN	1011000
11	18.2	NaN	NaN	NaN	NaN	3.8	22.6	101104	101105	101102	3	18.4	NaN	101101
11	20.6	NaN	NaN	22	NaN	NaN	40.8	101106	101107	101104	4	18.2	18.4	101102
11	21.6	NaN	NaN	21.8	NaN	NaN	61.4	101108	101109	101106	5	20.6	18.2	101104
11	NaN	NaN	34	29.4	NaN	NaN	83	1011010	1011011	101108	6	21.6	20.6	101106
11	NaN	NaN	3.2	NaN	NaN	10.6	23.6	1011015	1011016	101103	3	19.4	NaN	101101
11	18.8	NaN	NaN	19.2	NaN	NaN	62.8	1011020	1011021	101107	5	22	18.2	101104
11	NaN	NaN	35.4	NaN	NaN	35.4	81.6	1011022	1011023	1011020	6	18.8	22	101107
11	NaN	NaN	33.8	NaN	NaN	33.8	83.2	1011025	1011026	101109	6	21.8	20.6	101106
11	NaN	NaN	4.6	NaN	NaN	4.6	112.4	1011028	1011029	1011011	7	29.4	21.6	101108
11	NaN	NaN	35	NaN	NaN	35	82	1011030	1011031	1011021	6	19.2	22	101107
12	18.2	NaN	NaN	20	NaN	NaN	13	101202	101201	101203	2	NaN	NaN	1012000
12	26.6	NaN	NaN	29.6	NaN	NaN	33	101206	101207	101201	3	20	NaN	101203
12	NaN	NaN	57.4	24.4	NaN	NaN	59.6	101208	101209	101206	4	26.6	20	101201
12	26.6	NaN	NaN	31	NaN	NaN	31.2	101204	101205	101202	3	18.2	NaN	101203
12	26.6	NaN	NaN	23.2	NaN	NaN	57.8	1012011	1012012	101204	4	26.6	18.2	101202
12	NaN	NaN	24.2	NaN	NaN	5	84.4	1012013	1012014	1012011	5	26.6	26.6	101204
12	NaN	NaN	17.6	29.6	NaN	NaN	62.2	1012017	1012018	101205	4	31	18.2	101202
12	NaN	NaN	25.2	NaN	NaN	25.2	91.8	1012020	1012021	1012018	5	29.6	31	101205
12	NaN	NaN	14	NaN	NaN	35.8	62.6	1012024	1012025	101207	4	29.6	20	101201
12	NaN	NaN	33	NaN	NaN	33	84	1012028	1012029	101209	5	24.4	26.6	101206
12	24.8	NaN	NaN	NaN	NaN	36	81	1012032	1012033	1012012	5	23.2	26.6	101204
12	NaN	NaN	11.2	NaN	NaN	11.2	105.8	1012034	1012035	1012032	6	24.8	23.2	1012012
13	14	NaN	NaN	17	NaN	NaN	2.8	101302	101303	101301	2	NaN	NaN	1013000
13	NaN	NaN	6.4	16.6	NaN	NaN	16.8	101305	101304	101302	3	14	NaN	101301
13	NaN	NaN	13.6	18.2	NaN	NaN	33.4	101307	101308	101304	4	16.6	14	101302
13	22.4	NaN	NaN	NaN	NaN	65.4	51.6	1013010	1013011	101308	5	18.2	16.6	101304
13	NaN	NaN	43	NaN	NaN	43	74	1013012	1013013	1013010	6	22.4	18.2	101308
13	NaN	NaN	97.2	16.2	NaN	NaN	19.8	1013015	1013016	101303	3	17	NaN	101301
13	15.2	NaN	NaN	15.6	NaN	NaN	36	1013018	1013019	1013016	4	16.2	17	101303
13	NaN	NaN	0.8	21	NaN	NaN	51.2	1013020	1013021	1013018	5	15.2	16.2	1013016
13	33	NaN	NaN	20	NaN	NaN	72.2	1013022	1013023	1013021	6	21	15.2	1013018
13	NaN	NaN	11.8	NaN	NaN	11.8	105.2	1013024	1013025	1013022	7	33	21	1013021
13	20.4	NaN	NaN	18.6	NaN	NaN	51.6	1013026	1013027	1013019	5	15.6	16.2	1013016
13	NaN	NaN	3.4	NaN	NaN	8.6	72	1013028	1013029	1013026	6	20.4	15.6	1013019
13	22.2	NaN	NaN	23	NaN	NaN	70.2	1013032	1013033	1013027	6	18.6	15.6	1013019
13	NaN	NaN	24.6	NaN	NaN	24.6	92.4	1013035	1013034	1013032	7	22.2	18.6	1013027
13	NaN	NaN	24.8	NaN	NaN	24.8	92.2	1013039	1013040	1013023	7	20	21	1013021
13	NaN	NaN	23.8	NaN	NaN	23.8	93.2	1013043	1013044	1013033	7	23	18.6	1013027
14	21.6	NaN	NaN	18.4	NaN	NaN	6	101402	101403	101401	2	NaN	NaN	1014000
14	18	NaN	NaN	20	NaN	NaN	27.6	101404	101405	101402	3	21.6	NaN	101401
14	20.6	NaN	NaN	23.4	NaN	NaN	47.6	101408	101409	101405	4	20	21.6	101402
14	20.2	NaN	NaN	21.2	NaN	NaN	68.2	1014010	1014011	101408	5	20.6	20	101405
14	NaN	NaN	28.6	NaN	NaN	28.6	88.4	1014012	1014013	1014010	6	20.2	20.6	101408
14	20.2	NaN	NaN	19	NaN	NaN	24.4	1014015	1014016	101403	3	18.4	NaN	101401
14	18.6	NaN	NaN	20.4	NaN	NaN	44.6	1014017	1014018	1014015	4	20.2	18.4	101403
14	19	NaN	NaN	NaN	NaN	16.2	63.2	1014019	1014020	1014017	5	18.6	20.2	1014015
14	29.8	NaN	NaN	34.6	NaN	NaN	82.2	1014021	1014022	1014019	6	19	18.6	1014017
14	NaN	NaN	5	NaN	NaN	5	112	1014023	1014024	1014021	7	29.8	19	1014019
14	19	NaN	NaN	17.6	NaN	NaN	45.6	101406	101407	101404	4	18	21.6	101402
14	21	NaN	NaN	19.2	NaN	NaN	64.6	1014025	1014026	101406	5	19	18	101404
14	NaN	NaN	31.4	NaN	NaN	31.4	85.6	1014027	1014028	1014025	6	21	19	101406
14	19.8	NaN	NaN	20.8	NaN	NaN	63.2	1014030	1014031	101407	5	17.6	18	101404
14	NaN	NaN	34	NaN	NaN	34	83	1014032	1014033	1014030	6	19.8	17.6	101407
14	20.4	NaN	NaN	22	NaN	NaN	71	1014035	1014036	101409	5	23.4	20	101405
14	NaN	NaN	25.6	NaN	NaN	25.6	91.4	1014037	1014038	1014035	6	20.4	23.4	101409
14	NaN	NaN	27.6	NaN	NaN	27.6	89.4	1014040	1014041	1014011	6	21.2	20.6	101408
14	20.4	NaN	NaN	20.4	NaN	NaN	43.4	1014044	1014045	1014016	4	19	18.4	101403
14	20.4	NaN	NaN	20.6	NaN	NaN	63.8	1014046	1014047	1014044	5	20.4	19	1014016
14	NaN	NaN	32.8	NaN	NaN	32.8	84.2	1014048	1014049	1014046	6	20.4	20.4	1014044
14	13.8	NaN	NaN	14.2	NaN	NaN	65	1014052	1014051	1014018	5	20.4	20.2	1014015
14	NaN	NaN	1.8	NaN	NaN	7	78.8	1014053	1014054	1014052	6	13.8	20.4	1014018
14	NaN	NaN	1	NaN	NaN	1	79.2	1014057	1014058	1014051	6	14.2	20.4	1014018
14	NaN	NaN	0.2	NaN	NaN	0.2	116.8	1014060	1014061	1014022	7	34.6	19	1014019
14	27.6	NaN	NaN	27.8	NaN	NaN	83.8	1014062	1014063	1014026	6	19.2	19	101406
14	NaN	NaN	5.6	NaN	NaN	5.6	111.4	1014064	1014065	1014062	7	27.6	19.2	1014026
14	NaN	NaN	5.4	NaN	NaN	5.4	111.6	1014066	1014067	1014063	7	27.8	19.2	1014026
14	NaN	NaN	33	25.8	NaN	NaN	84	1014069	1014070	1014031	6	20.8	17.6	101407
14	NaN	NaN	7.2	NaN	NaN	7.2	109.8	1014072	1014073	1014070	7	25.8	20.8	1014031
14	NaN	NaN	19.4	NaN	NaN	5.4	93	1014075	1014076	1014036	6	22	23.4	101409
14	19.8	NaN	NaN	18.2	NaN	NaN	63.8	1014081	1014082	1014045	5	20.4	19	1014016
14	NaN	NaN	2.6	NaN	NaN	2.8	83.6	1014083	1014084	1014081	6	19.8	20.4	1014045
14	NaN	NaN	35	NaN	NaN	35	82	1014087	1014088	1014082	6	18.2	20.4	1014045
14	NaN	NaN	32.6	NaN	NaN	32.6	84.4	1014092	1014093	1014047	6	20.6	20.4	1014044
15	15	NaN	NaN	NaN	NaN	11.4	6	101502	101503	101501	2	NaN	NaN	1015000
15	17.6	NaN	NaN	16.6	NaN	NaN	21	101504	101505	101502	3	15	NaN	101501
15	17.2	NaN	NaN	15.8	NaN	NaN	38.6	101506	101507	101504	4	17.6	15	101502
15	17	NaN	NaN	16.4	NaN	NaN	55.8	101508	101509	101506	5	17.2	17.6	101504
15	NaN	NaN	2.4	16.2	NaN	NaN	72.8	1015010	1015011	101508	6	17	17.2	101506
15	15.6	NaN	NaN	NaN	NaN	9	37.6	1015014	1015015	101505	4	16.6	15	101502
15	NaN	NaN	12.8	NaN	NaN	32.8	53.2	1015016	1015017	1015014	5	15.6	16.6	101505
15	18	NaN	NaN	17.6	NaN	NaN	54.4	1015019	1015020	101507	5	15.8	17.6	101504
15	NaN	NaN	10	NaN	NaN	2.8	72.4	1015021	1015022	1015019	6	18	15.8	101507
15	23.6	NaN	NaN	16	NaN	NaN	72.2	1015024	1015025	101509	6	16.4	17.2	101506
15	NaN	NaN	6.8	NaN	NaN	6.2	95.8	1015026	1015027	1015024	7	23.6	16.4	101509
15	NaN	NaN	2	NaN	NaN	5.6	89	1015030	1015031	1015011	7	16.2	17	101508
15	14.4	NaN	NaN	16	NaN	NaN	72	1015036	1015037	1015020	6	17.6	15.8	101507
15	NaN	NaN	30.6	24.8	NaN	NaN	86.4	1015038	1015039	1015036	7	14.4	17.6	1015020
15	NaN	NaN	5.8	NaN	NaN	5.8	111.2	1015042	1015043	1015039	8	24.8	14.4	1015036
15	NaN	NaN	0.8	NaN	NaN	3.4	88.2	1015045	1015046	1015025	7	16	16.4	101509
15	NaN	NaN	29	NaN	NaN	10.4	88	1015049	1015050	1015037	7	16	17.6	1015020
16	15.6	NaN	NaN	17.8	NaN	NaN	7.4	101602	101603	101601	2	NaN	NaN	1016000
16	16.6	NaN	NaN	15.4	NaN	NaN	23	101604	101605	101602	3	15.6	NaN	101601
16	16	NaN	NaN	NaN	NaN	3	39.6	101608	101609	101604	4	16.6	15.6	101602
16	16.4	NaN	NaN	15	NaN	NaN	55.6	1016010	1016011	101608	5	16	16.6	101604
16	18.8	NaN	NaN	20.8	NaN	NaN	72	1016012	1016013	1016010	6	16.4	16	101608
16	NaN	NaN	24.2	NaN	NaN	24.2	92.8	1016016	1016017	1016013	7	20.8	16.4	1016010
16	14.8	NaN	NaN	14.8	NaN	NaN	38.4	1016019	1016020	101605	4	15.4	15.6	101602
16	18	NaN	NaN	17.8	NaN	NaN	53.2	1016021	1016022	1016019	5	14.8	15.4	101605
16	15.2	NaN	NaN	16.8	NaN	NaN	71.2	1016023	1016024	1016021	6	18	14.8	1016019
16	NaN	NaN	30.6	24.4	NaN	NaN	86.4	1016025	1016026	1016023	7	15.2	18	1016021
16	NaN	NaN	3.8	15.2	NaN	NaN	25.2	101606	101607	101603	3	17.8	NaN	101601
16	NaN	NaN	3.6	NaN	NaN	10	40.4	1016029	1016030	101607	4	15.2	17.8	101603
16	22	NaN	NaN	18.2	NaN	NaN	70.6	1016034	1016035	1016011	6	15	16	101608
16	NaN	NaN	6.4	NaN	NaN	3.8	92.6	1016036	1016037	1016034	7	22	15	1016011
16	NaN	NaN	13.4	NaN	NaN	28.2	88.8	1016040	1016041	1016035	7	18.2	15	1016011
16	NaN	NaN	26.2	NaN	NaN	26.2	90.8	1016014	1016015	1016012	7	18.8	16.4	1016010
16	19.6	NaN	NaN	14.4	NaN	NaN	71	1016050	1016051	1016022	6	17.8	14.8	1016019
16	NaN	NaN	26.4	NaN	NaN	26.4	90.6	1016052	1016053	1016050	7	19.6	17.8	1016022
16	NaN	NaN	29	NaN	NaN	29	88	1016056	1016057	1016024	7	16.8	18	1016021
16	NaN	NaN	6.2	NaN	NaN	6.2	110.8	1016059	1016060	1016026	8	24.4	15.2	1016023
16	21	NaN	NaN	19.6	NaN	NaN	53.2	1016048	1016049	1016020	5	14.8	15.4	101605
16	19	NaN	NaN	18.4	NaN	NaN	74.2	1016061	1016062	1016048	6	21	14.8	1016020
16	NaN	NaN	12	NaN	NaN	23.8	93.2	1016063	1016064	1016061	7	19	21	1016048
16	19.2	NaN	NaN	18.4	NaN	NaN	72.8	1016066	1016067	1016049	6	19.6	14.8	1016020
16	NaN	NaN	25.8	NaN	NaN	25.8	91.2	1016070	1016071	1016067	7	18.4	19.6	1016049
16	NaN	NaN	31.6	28	NaN	NaN	85.4	1016073	1016074	1016051	7	14.4	17.8	1016022
16	NaN	NaN	3.6	NaN	NaN	3.6	113.4	1016076	1016077	1016074	8	28	14.4	1016051
16	NaN	NaN	24.4	NaN	NaN	24.4	92.6	1016079	1016080	1016062	7	18.4	21	1016048
16	NaN	NaN	25	NaN	NaN	25	92	1016068	1016069	1016066	7	19.2	19.6	1016049
